**Leverage drug perturbation to reveal genetic regulators of hepatic gene expression in  
African Americans**

Yizhen Zhong<sup>1</sup>, Tanima De<sup>1</sup>, Juan Avitia<sup>1</sup>, Cristina Alarcon<sup>1</sup>, Minoli A. Perera<sup>1\*</sup>

<sup>1</sup>Department of Pharmacology, Northwestern University Feinberg School of Medicine, Chicago,  
IL 60611, USA

\*Send correspondence to:

Minoli A. Perera, PharmD, PhD <[minoli.perera@northwestern.edu](mailto:minoli.perera@northwestern.edu)>:

## Abstract

**Background:** Expression quantitative loci (eQTL) studies have paved the way in identifying genetic variation impacting gene expression levels. African Americans (AAs) are disproportionately underrepresented in eQTL studies, resulting in a lack of power to identify population-specific regulatory variations especially related to drug response. Specific drugs are known to affect the biosynthesis of drug metabolism enzymes as well as other genes. We used drug perturbation in cultured primary hepatocytes derived from AAs to determine the effect of drug treatment on eQTL mapping and to identify the drug response eQTLs (reQTLs) that show altered effect size following drug treatment. **Methods:** Whole-genome genotyping (Illumina MEGA array) and RNA-sequencing were performed on 60 primary hepatocyte cultures after treatment with 6 drugs (Rifampin, Phenytoin, Carbamazepine, Dexamethasone, Phenobarbital, and Omeprazole) and at baseline (no treatment). eQTLs were mapped by treatment and jointly using Meta Tissue. **Results:** We found varying transcriptional changes across different drug treatments and identified Nrf2 as a potential general transcriptional regulator. We jointly mapped eQTL with gene expression data for across all drug treatments and baseline which increased our power to detect eQTLs by 2.7-fold. We also identified 2,988 reQTLs (eQTLs with altered effect size after drug treatment), which were more likely to overlap transcription factor binding sites and uncovered a novel reQTL, rs61017966 that increases *CYP3A5* gene expression, a major drug metabolizing enzyme responsible for both drug response and adverse events across several drug classes. **Conclusions:** Our results provide novel insights into the genetic regulation of gene expression in hepatocytes through drug perturbation and provide insight into SNPs that effect the liver's ability to respond to transcription upregulation.

## Introduction

Mapping expression quantitative trait loci (eQTL) has revealed important regulatory variants of gene expression and has helped implicate the biological mechanism underlying GWAS associations.(Cookson et al., 2009) These regulatory effects are largely context-specific and can change

with stimulation. As an example, genetic regulation of the transcriptional response to bacterial infection in immune cells (Barreiro et al., 2012, Nédélec et al., 2016, Kim-Hellmuth et al., 2017), statins treatment in LCLs (Mangravite et al., 2013), and doxorubicin treatment in iPSC-derived cardiomyocytes (Knowles et al., 2018) have been studied and provide insights into the interindividual variability to stimulus response and disease susceptibility. However, the genetic regulation of liver enzyme after drug exposure is not clearly understood, especially in populations that are largely underrepresented in current genetic studies.

The maintenance of the proper drug concentration is critical to drug efficacy and to avoiding adverse events. Proper concentrations of drug within the body are driven by the conversion of medications to metabolites through Phase I and Phase II enzymes. Hepatic enzymes are responsible for much of this conversion. This process involves two classes of drug metabolizing enzymes (DMEs): Phase I DME reactions which include oxidation, reduction, and hydrolysis through the cytochrome P450 (CYP450) proteins, and Phase II DME reactions which include glucuronidation, sulfation, and acetylation and occur through conjugation enzymes such as uridine 5'-diphosphoglucuronosyltransferases (UGTs), sulfotransferases (SULTs), N-acetyltransferases (NATs), and glutathione S-transferases (GSTs). (Jancova et al., 2010) There are more than 50 CYP enzymes found in human tissues with the CYP1, 2, and 3 families metabolize 70%-80% of drugs currently in clinical use. (Zanger and Schwab, 2013). The expression level of drug metabolism enzymes and their regulatory proteins vary greatly between individuals and populations. (Zanger and Schwab, 2013, Zhang et al., 2021) Differences in the activity and expression of these important genes have already been associated to several severe adverse drug events (ADE) such as opioid toxicity and adverse cardiovascular outcomes in individuals taking the antiplatelet drugs, just to name a few.(de Leon et al., 2003, Biswas et al., 2022) Importantly, most studies of these genes have focused on coding variants and have been conducted in mainly European and East Asian populations. Knowledge of regulatory genetic variants that result in variability to drug metabolism enzymes is an unexplored area in understudied populations like African Americans. (Relling and Klein, 2011)(Perera et al., 2013)

The expression of DMEs can be affected by drug perturbation. It is well known that specific drugs upregulate the transcription of DMEs leading to greater enzyme activity in the liver. During drug enzyme induction, drug molecules bind and activate several nuclear receptors such as the pregnane X receptor (PXR), Constitutive androstane receptor (CAR), Glucocorticoid receptor (GR), and Aryl hydrocarbon receptor (AhR) resulting in increased transcription. (Prakash et al., 2015) The genetic basis underlying interindividual variability in transcriptional response upon drug enzyme induction is largely unknown and is important to inform on the ability of individuals to respond to drug exposure with clinical relevance in multi-drug dosing. It should be noted that African Americans suffer from a higher rate of ADEs and death due to ADE than other populations. (Shepherd et al., 2012)

Lastly paired transcriptomic and genomics data in under-represented populations is scarce, limiting the ability to conduct well-powered eQTL mapping studies. Approximately 13% of GTEx subject self-identify as African American, however, there are only 15 African ancestry subjects with both genotype and gene expression data in liver – leaving discovery of population-specific eQTLs woefully underpowered. Moreover, as we and others have shown, population specific regulatory variation may uncover the biological underpinning of GWAS associated loci. (Zhong et al., 2020, Gay et al., 2020)

Here we investigated the transcription and genetic regulation changes in response to multiple drug perturbations in hepatocytes, a highly clinically relevant cell type, that are derived from African American donors. Our analysis addresses the three questions 1) what are the commonalities and specificity of the transcriptional response across different drug inducer exposures. 2) what are the potential genetic regulators of drug-induced transcriptional changes, and 3) what are the regulatory variants underlying response to drug perturbation. Together, we comprehensively characterize the genetic regulation in hepatocytes after drug perturbation and leveraging gene induction to identify novel genetic variants that affect drug response in African Americans.

## Results

### Drug metabolizing enzymes are differentially expressed (DE) after treatment with enzyme inducers

To investigate the perturbation effect of drugs on the transcriptome, we compared the expression profiles of drug-treated conditions with the baseline gene expression (**Figure 1B**). DMEs were among the most differentially expressed genes (**Figure 1B**), including phase1 DME genes *CYP3A4* and *CYP2B6*, phase 2 DME genes *UGT1A4* and *UGT1A5* and the transporter gene, *SLC5A12*. The average number of up-regulated genes was 332 and the average number of down-regulated genes was 289 across 6 drug treatment conditions (FDR<0.01, log(FC)>=0.5). Phenobarbital (458 up-regulated genes and 832 down-regulated genes) and Omeprazole treatment (597 up-regulated gene and 673 down-regulated gene) had the largest number of DE genes, suggesting these two drugs induced a stronger transcriptional response compared to other treatments. Carbamazepine treatment (80 up-regulated genes and 20 down-regulated genes) had the least number of DE genes. We observed the same pattern when using a less stringent threshold to identify DE genes (FDR<0.01 with no log(FC) threshold, **Sup Figure 1**).

We further sought to identify the commonalities across different drug treatments which may implicate the common mechanism of regulation. Using a threshold of FDR<0.01, we identified 200 commonly up-regulated DE genes and 196 commonly down-regulated genes across all drug treatments. Commonly upregulated genes include: *CYP3A5*, *CYP2B6*, *UGT1A1*, *UGT1A4* and *UGT1A5* (Supplementary file1). Gene ontology (GO) analysis showed commonly up-regulated genes were strongly enriched in metabolic process, xenobiotic stimulus and drug metabolic process (**Figure 1D**). Commonly up-regulated genes were also enriched for genes with Nrf2 transcription factor binding sites (TFBS) (**Figure 1E**). The enrichment remains when using a less stringent threshold to identify DE genes (FDR<0.05). Nrf2 is the key regulatory of anti-oxidative response and its role in the coordinated regulation of drug metabolism is gaining attention(Shen and Kong, 2009a). Nrf2 is also upregulated in most drug treatment conditions with the exception of Dexamethasone (Log fold change: Omeprazole=0.44, FDR=4.04e-31, Phenobarbital=0.41, FDR=3.46e-28 Dexamethasone=-0.03, FDR=0.39, Carbamazepine=0.16, FDR=6.77e-6, Phenytoin=0.27, FDR=3.05e-14, Rifampicin=0.53,

FDR=3.92e-42). Commonly down-regulated genes have fewer specific functions than commonly up-regulated genes with the top enriched GO terms being nucleotide biosynthetic process and developmental process (Supplementary File 2, Sup Figure 2).

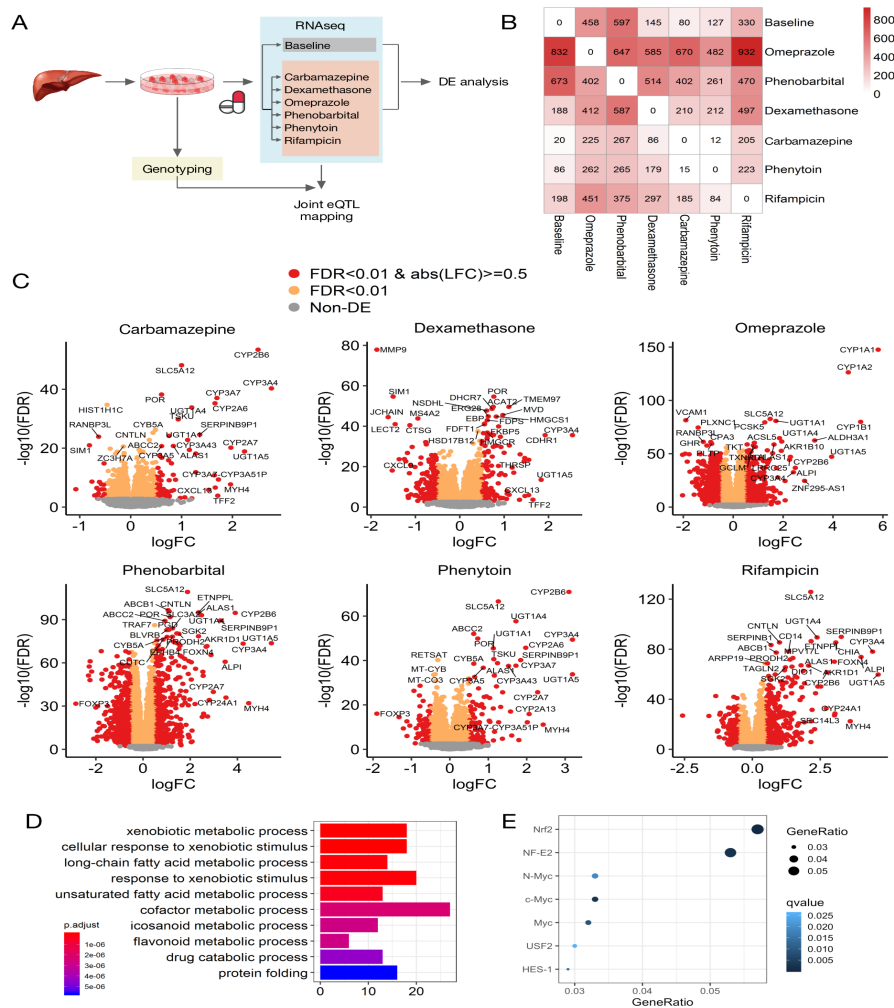

**Figure 1: Transcriptional response to drug treatments**

**A)** 60 livers from African American donors were obtained and cultured primary hepatocytes extracted. Genome-wide genotyping and RNA sequencing at baseline (no treatment) and after treatment with 6 drugs known to induce drug metabolizing enzymes were obtained to measure gene expression. The transcriptional change with drug treatments were assessed with differential gene expression analysis and the genetic regulation change by jointly mapping eQTLs across all conditions. **B)** Number of DE genes with  $FDR < 0.01$  and  $abs[Log(FC)] \geq 0.5$ . The values above the diagonal show the number of up-regulated genes and the values below the diagonal show the number of down-regulated genes. **C)** Volcano plots show the DE genes of each drug treatment comparing with baseline. Drug metabolizing enzymes including *CYP2B6*, *CYP3A4*, *UGT1A5* and *UGT1A4* were some of the top DE genes. **D)** Pathways represented by commonly upregulated genes (genes that were significantly upregulated in all conditions at  $FDR < 0.01$ ) The x-axis shows the number of genes in each ontology category with the color scale representing the adjusted p-value of the enrichment. **E)** Enrichment of transcriptional binding sites in commonly upregulated genes. The x-axis shows the GeneRatio for each significant transcriptional binding factor (number of commonly upregulated genes in each category divided by the total number of genes in each category).

### **Inter-individual variability is the major source of transcriptome variability**

We used a linear mixed model to investigate the sources of variation in gene expressions (**Fig 2A**). The largest variance was attributed to inter-individual differences (mean  $\pm$  sd = 0.612 $\pm$ 0.162) which may be due to genetics, epigenetics, physiological conditions, pathological factors and environmental influences. Genes with large inter-individual variance were enriched in immune response pathways. The inter-treatment difference (labeled drug in **Figure 2A**) was the second largest tested factor contributing to the transcriptome variability (mean  $\pm$  sd = 0.041 $\pm$ 0.041, **Figure 2B**). Genes with high inter-treatment differences include *CYP1B1*, *CYP1A1* and *CYP1A2* which were significantly upregulated only with Omeprazole treatment (**Figure 1C**). These genes belong to the "Ahr gene battery" and are induced through the activation of the Ahr nuclear receptor. This may suggest the drug-specific transcriptional response is mostly due to the selective binding to nuclear receptors.

Genes with large proportions of variability explained by other factors can also provide interesting insights. Genes with large contribution from sex were sex chromosome-linked such as *EIF1AY*, *UTY* and *KDM5D* as expected. The majority of the variability in *ZNF518B* (71.0%), *TSPYL5* (69.6%), *ZIC1* (65.2%) were explained by age. Notably, these genes were previously found to be associated with age in other tissue types (Martella et al., 2014, Mimura, 2019, Bacos et al., 2016). This suggests that this age-dependent expression pattern remains in African American hepatocytes and our method was robust in identifying contributing factors of gene expression.



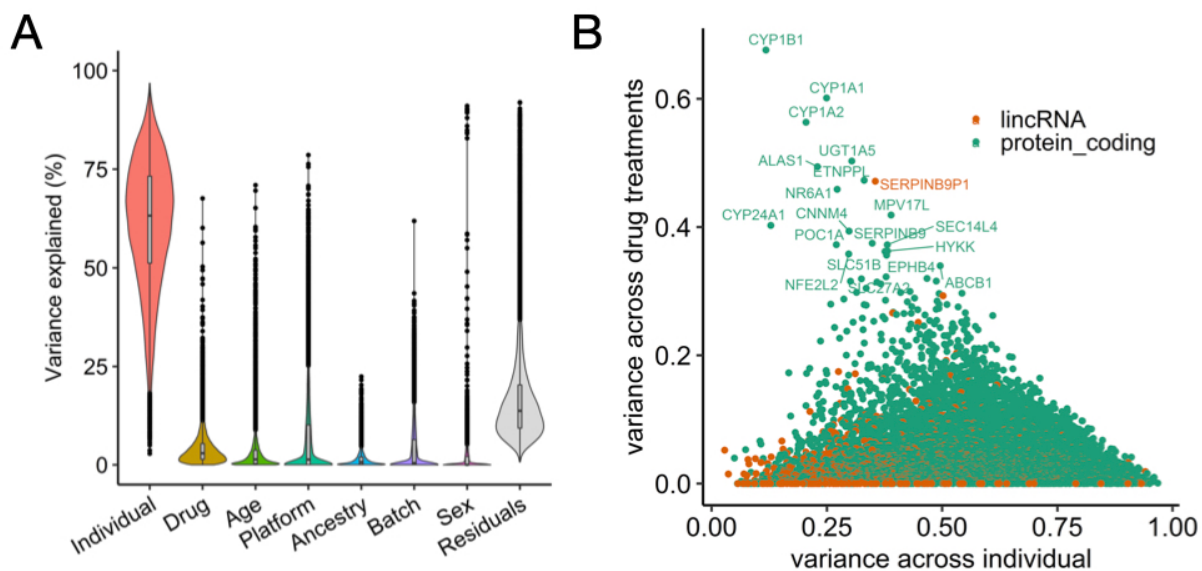

## Figure 2: Factors contributing to the variability in cross-drug gene expression

We used a linear mixed model to partition variability in expression data across multiple drug treatment conditions. **A)** Distribution of the percentage of variability explained by each factor. The most variability is attributed to inter-individual variability and then inter-condition variability (labeled “Drug”). **B)** Comparison of inter-individual variability with inter-condition variability of each gene. *CYP1B1*, *CYP1A1* and *CYP1A2* have high inter-condition variability.

## Joint-mapping of eQTLs across drug treatments increases detection power

We first performed eQTL mapping separately in each drug treatment condition (TBT, Treatment-By-Treatment). We consistently detected more eGenes with drug treatment as compared with baseline. The enrichment of TBT eQTLs in functional annotations did not differ between drug treatments and baseline (**Sup Figure 3**).

To leverage the repeated measurements of gene expression of each primary hepatocyte cell culture in different conditions, we used a linear mixed model to jointly map eQTLs while accounting for the correlation of expression in different drug treatment conditions implemented in Meta-Tissue (Sul et al., 2013). Meta-Tissue estimates the intercept and coefficient of genotype on gene expression for each condition and performs meta-analysis after uncorrelation of coefficient estimates. Meta-Tissue also estimates the posterior probability that the effect is present in each condition (represented as an m-value).

With the Meta-Tissue fixed effect (FE) and random effect (RE) meta-analysis of uncorrelated coefficients, we increased the number of identified eGenes (Meta-Tissue eGene) and eQTLs (Meta-Tissue eQTLs) compared with that of baseline TBT eQTL analysis (**Table 1**). The number of unique eGenes (n=665) combined across all TBT conditions was still less than that of Meta-Tissue FE model (n=818) or RE model (734). The fixed effect model assumes the eQTL effect is the same across different conditions, while the random effect model allows the eQTL effects to vary from condition to condition. 694 eQTLs are unique to the RE analysis and 6,042 eQTLs are unique to the FE analysis, suggesting eQTLs have both fixed effect or random effect across drug treatment conditions.

**Table 1: eGene and eQTL discovery with different mapping methods.**

|            | <b>TBT baseline<br/>(eGenes/eQTLs)</b> | <b>TBT all<br/>conditions<br/>(eGenes/eQTLs)</b> | <b>Meta-Tissue fixed<br/>effect<br/>(eGenes/eQTLs)</b> | <b>Meta-Tissue<br/>random effect<br/>(eGenes/eQTLs)</b> |
|------------|----------------------------------------|--------------------------------------------------|--------------------------------------------------------|---------------------------------------------------------|
| FDR < 0.05 | 299/24,799                             | 665/48,027                                       | 818/53,487                                             | 734/48,134                                              |

The number of eGenes (genes with at least one significant eQTL) and eQTLs identified with each method using an adjusted p-value threshold of less than 0.05. **TBT baseline:** Significant eGenes and eQTLs in hepatocytes after multi-testing correction on nominal p-values calculated from the Meta-Tissue linear regression in the baseline condition only. **TBT all conditions:** We applied multi-testing correction on nominal p values calculated from the Meta-Tissue linear regression in each condition separately (6 drug treatment conditions and baseline) and identified the intersection of unique eGenes and eQTLs that are significant in any conditions. **Meta-Tissue fixed effect:** Significant eGenes and eQTLs in the fixed effect model. **Meta-Tissue random effect:** Significant eGenes and eQTLs in the random effect model.

The Meta-Tissue FE eGenes are significantly enriched in the glutathione derivative metabolic process (q value = 0.00358) and xenobiotic catabolic process (q value = 0.03) within the biological process ontologies while the baseline eGenes were not (**Figure 3B**). This demonstrates that drug treatment with enzyme inducers uncovered important genetic regulation of drug metabolism that was undetectable at baseline. We also increased the replication with eGenes found in GTEx liver (n=153). The number of overlapping eGenes between Meta-Tissue FE model and GTEx liver was 501 compared with 220 of baseline eGenes mapped through a TBT approach (**Figure 3A**).

### Genetic regulation change upon drug response

We examined the heterogeneity of eQTLs effects across conditions with  $I^2$  statistics which estimates the percentage of variation in eQTL effect size explained by heterogeneity. We found TBT eQTLs had more extreme  $I^2$  than the meta-tissue FE model and the meta-tissue RE model eQTLs (**Sup Figure 4**), suggesting that the TBT model might be more powerful in identifying drug-specific eQTLs than meta-analysis based methods. Therefore, we combined the Meta-Tissue FE eQTLs and TBT eQTLs (n=59169) to identify if any of these eQTLs were drug response specific (reQTL). Note that heterogeneity measured by  $I^2$  captures the variance across all conditions instead of the difference between drug treatment and baseline .

We defined reQTLs as eQTLs with altered effect size after drug treatment. We used the Z-score method (Kim-Hellmuth et al., 2017) to test if the eQTL effect size after drug treatment was significantly different from the effect size at baseline while accounting for the correlation of beta estimates from linear mixed model. The magnitude of changes in the eQTL effect size is measured as a z score. We computed the significance of z score by comparing it with null z scores calculated from random permutations. We identified 2,988 reQTLs for 194 genes using q value < 0.05 across 6 drug treatment conditions [Supplementary File 3]. The remaining Meta-Tissue FE eQTLs and TBT eQTLs were classified as non-reQTL.

The z scores were mostly correlated between drug treatment conditions for reQTLs, suggesting the shared genetic regulation changes across drug treatments (**Sup Figure 5** ). Interestingly, the highest

correlation of z scores was for Carbamazepine and Phenytoin (Pearson correlation=0.880, p-value<2.2e-16) which is consistent with the high similarity of their transcriptome profiles. In particular, the highest z scores were found for *UGT1A5*, *UGT1A4* and *CYP3A5* eQTLs across all drug treatment conditions (**Figure 3D**). We also identified reQTLs that were specific to one drug treatment (N = 2,541). For example, regulatory variants for *VRK3* were only seen after omeprazole treatment (**Figure 3D; Sup Figure 6**). *VRK3* belongs to the vaccinia-related kinases family and affects cell cycle progression as a serine/threonine kinase (Lee et al., 2017). Omeprazole has also been shown to restrict cell proliferation and induce cell cycle arrest (Hou et al., 2018, Paz et al., 2020). This suggests genetic regulation of *VRK3* might play a role in the response to Omeprazole treatment by regulating the cell cycle.

The enrichment of reQTL and non-reQTL in TFBS showed that while both groups were enriched for several TFBS, reQTLs have a larger OR for overlap with GABPA (also known as Nrf2), REST, ERG1, ZBTB33, RXRA and HNF4A binding peaks as compared to non-reQTLs (**Figure 3C**). As described previously, Nrf2 was enriched in commonly up-regulated genes across 6 drug treatments as previously stated. The enrichment of reQTLs in Nrf2 binding peaks further highlights the role of Nrf2 in modulating drug response. These results suggest the importance of these TFBS in the appropriate transcriptional response to drug exposure, such as upregulating drug clearance mechanisms to prevent toxicity. This response may be blunted or enhanced by reQTLs.

We compared the population differentiation in allele frequency between reQTLs and non-reQTLs. We used Wright's fixation index (*F<sub>st</sub>*) to measure the extent of variation in allele frequency between Africans and Europeans. The reQTLs have higher *F<sub>st</sub>* than non-reQTLs (**Sup Figure 7**, Wilcoxon rank sum one-sided test p=3.62e-10, median *F<sub>st</sub>* of reQTL = 0.118; median *F<sub>st</sub>* of non-reQTL: 0.111). This finding suggests allele frequency differences in regulatory variants link to transcriptional response may underly population differences in drug response or ADEs, though functional assays are needed validate these findings.

We then investigated the mechanism underlying the reQTLs with drug treatment. For each eGene, we compared the log fold change with the largest absolute z score among its eQTLs for each drug

treatment (**Figure 3D**). There was an independent relationship between the differential expression of each gene after drug treatment and the change of eQTL effect size. For example, *PLEKHA7* is an adherens junction protein and has been associated with blood pressure in previous GWAS (Lin et al., 2011). Here we found *PLEKHA7* was not differently expressed with drug treatments (LFC; Omeprazole=-0.31, Phenobarbital= -0.10, Dexamethasone=-0.05, Carbamazepine=-0.06, Phenytoin=-0.07, Rifampicin=-0.06), but had large difference in eQTL beta estimates (maximum z score: Omeprazole=-3.04, Phenobarbital= 2.37, Dexamethasone=4.02, Carbamazepin=3.14, Phenytoin=1.67, Rifampicin=2.67) as shown in **Sup Fig 8**. We also identified lfc QTL where we tested the association between genotype with gene expression log fold change. There is a low correlation between lfc eQTL z score and reQTL z score, which further suggests the independence between gene expression change and regulatory effect change (**Sup Fig 9**).

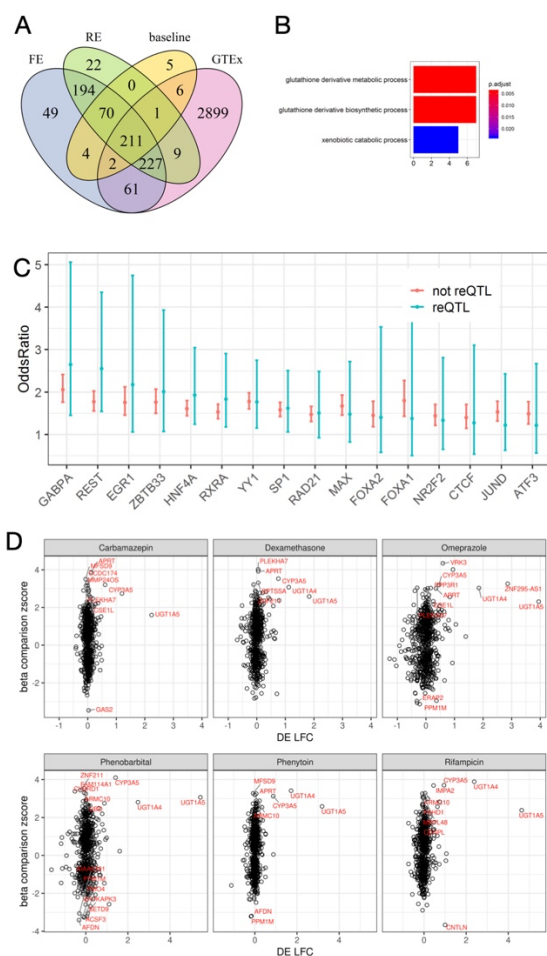

**Figure 3 Identification of reQTLs.**

**A)** The Venn Diagram comparing the eGenes identified in the Meta-Tissue FE model, Meta-Tissue RE model, baseline TBT and the GTEx liver dataset. Using Meta-Tissue increased the replication in GTEx liver as compared with TBT baseline results. **B)** Enrichment analysis of Meta-Tissue FE eGenes. The x axis is the number of eGenes in each category with the color of each bar representing the adjusted enrichment p-value. The baseline eGenes were not enriched in metabolic processes while the FE eGenes showed enrichment in glutathione derivative metabolic process. **C)** Enrichment of reQTLs and non-reQTLs within TFBS annotations. reQTLs show larger OR for overlap with GABPA, REST, ERG1 ZBTB33, RXRA and HNF4A binding peaks than non-reQTLs. **D)** Comparison of log fold change of eGenes expression (DE LFC) and the highest absolute z score among eQTLs for each eGene. This analysis showed independence between the differential gene expression and the effect size of eQTLs for those genes that are differentially expressed between treatment and baseline.

### **Analysis of *CYP3A5* expression regulation through rs61017966.**

Among the eGenes with reQTLs, we found one DME, *CYP3A5*, which had 59 reQTLs. *CYP3A5* is labeled as a Very Important Pharmacogene (VIP gene) within PharmGKB(Gong et al., 2021), and metabolizes ~37% of commonly used drugs together with other *CYP3A* family genes. *CYP3A5* genotypes have been linked to interindividual variability in response to the lipid-lowering drugs, statins, and diseases such as blood pressure/hypertension (Lamba et al., 2012). *CYP3A5* expression is highly differentiated across populations with low expression in Europeans (due to the presence of a splice variant in *CYP3A5* in this populations) but significantly higher expression in African populations.

When comparing the m-values of all *cis* SNPs of *CYP3A5*, we found that reQTLs were not statistically significant in baseline, suggesting that drug perturbation enhances the discovery of these regulatory variants. One of the drug-specific eQTLs, rs61017966 (Indel: CCA>A), showed that the A allele was positively associated with *CYP3A5* expression (**Fig 4A**) in all treatments. Previous eQTL mapping efforts, both in GTEx and in our baseline data, show no significant eQTLs for this gene. The effect size of rs61017966 for *CYP3A5* increased from 0.38 in baseline to 0.77-0.96 with drug treatments, with the largest effect size (0.96) seen with phenobarbital treatment (**Fig 4B**). rs61017966 is 15kb upstream of *CYP3A5* and is located in a strong enhancer region (based on ENCODE ChromHMM prediction) (**Fig 4C**). This SNP is positioned under multiple active histone marker peaks (H3K27ac, H3K9ac, H3K4me1 and H3K4me3) mapped in ENCODE liver ChIP-seq data. Moreover, this SNP overlaps many ChIP-seq peaks for TFBS, such as JUND, ERG1 and SP1. This SNP is also highly differentiated across human populations with the allele frequency of the alternative allele at 69% in Africans and 7% in Europeans. Based on these results, this SNP may be a key regulator of *CYP3A5* gene expression, though further functional validation and fine mapping is needed.

Notably, *CYP3A5* activity is known to be regulated by a splicing variant, rs776746 (C/T), which is also highly differentiated between Africans and Europeans (T: 82% in AFR and 6% in EUR). We found moderate LD between rs776747 and rs61017966 in African ancestry populations ( $R^2$ : AA hepatocyte: 0.59718, ASW: 0.608969, YRI: 0.508190.). We fitted a baseline model of *CYP3A5* expression with



rs776746 and a full model of *CYP3A5* expression with rs776746 and rs61017966 together. We performed likelihood ratio test showing that the addition of rs61017966 significantly increased the model goodness-of-fit in the phenytoin and rifampicin treatment conditions (Baseline:  $p=0.866$ , Omeprazole:  $p=0.192$ , Phenobarbital:  $p=0.083$ , Dexamethasone:  $p=0.053$ , Carbamazepine:  $p=0.536$ , Phenytoin:  $p=0.045$ , Rifampicin:  $p=0.027$ ). The finding of significance in two drug treatment conditions as oppose to all, may be due to the different degrees of upregulation of *CYP3A5* by the different drug treatments. Given the small sample size of our cohort, the larger the transcriptional difference the more power we have to detect the association. Therefore, rs61017966 may confer a non-coding regulatory effect in addition to the effect of the splicing variant on *CYP3A5* gene expression.

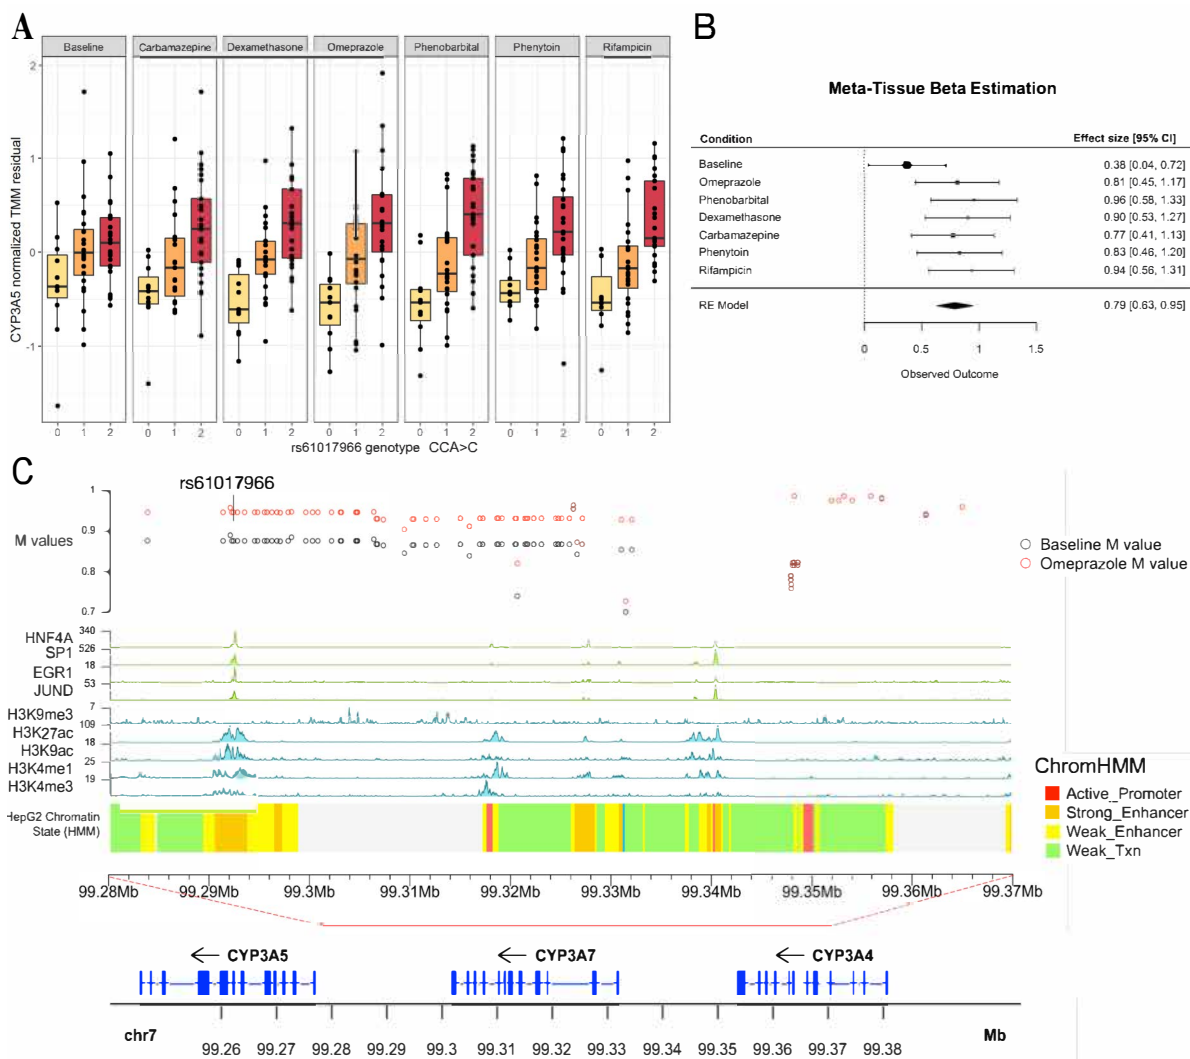

**Figure 4: Regulation of *CYP3A5* gene expression through the reQTL, rs61017966**

A) Boxplots of rs61017966 genotype and *CYP3A5* gene expression in all drug treatment and baseline. The y-axis is the normalized TMM value after regressing covariates B) Forrest plot of rs61017966 effect size and standard error estimates from Meta-Tissue linear mixed model in each drug condition. C) Genomic context of rs61017966 (annotation shown are from just upstream of the *CYP3A5* TSS to within *CYP3A4*). rs61017966 has different m-values between baseline (black points in the top panel) and after Omeprazole treatment (red points in the top panel). rs61017966 overlaps with TF binding sites (green tracks) and active histone markers (blue tracks). This SNP is 15kb upstream of *CYP3A5* and locates in the strong enhancer region based on ENCODE ChromHMM prediction.

## Discussion

Understanding how genetic variation affects genes that are important for drug response promises to help deliver safe and effective drug treatment and therapeutics. Unfortunately, the variation resulting from drug exposure and the underlying genetic regulatory mechanisms are less understood. Furthermore, minority populations such as African Americans are largely underrepresented in current genetic studies even though they have repeatedly shown differences in drug response to a wide variety of medications. (Mehanna et al., 2017, Gong et al., 2016, Liu et al., 2021, Kranzler et al., 2021, Samedy-Bates et al., 2019) Studies also showed African Americans are disproportionately underrepresented in clinical trials which raises concern on the safety and efficacy of new therapies. (2018) Here, we present the first comprehensive evaluation of transcriptional response and its genetic regulation across 6 drug treatments in hepatocytes derived exclusively from African American donors.

We evaluated expression profiles with drug exposure and found varying transcriptional changes with different drugs. We found commonly upregulated genes are enriched in Nrf2 binding and eQTLs discovered with both TBT and joint modelling were more likely to overlap with Nrf2 binding sites. Nrf2 plays a central role in regulating the response to antioxidative stress which is a common effect of drug treatment (Deavall et al., 2012) and there is also evidence of the crosstalk between Nrf2 and drug-activated nuclear receptors (Gong et al., 2006, Klotz and Steinbrenner, 2017, Shen and Kong, 2009a). Animal studies have shown that Nrf2 may regulate Phase I and II enzymes. (Shen and Kong, 2009b, Aleksunes and Klaassen, 2012) Here, we further strengthen the role of Nrf2 as the master regulator of gene expression in human. Meanwhile, we found a distinct expression profile of Omeprazole treatment through the activation of its unique nuclear receptor. The mechanism of the crosstalk and coordination of shared and drug-specific transcriptional responses warrants future investigation.

We showed that inter-individual variability explains the most variance in the drug-induced transcriptome data. However, we found limited genetic regulation for most DMEs which were differentially expressed. For example, we did not find eQTLs for *CYP2B6* or *CYP3A4* which are

important DMEs. This suggests other factors besides genetics may play an important role in the dynamic response to drug treatment and are left to be discovered or we lack the power to detect these smaller signals. There is a growing interest in using multi-omics approaches to decipher the variability in phenotypic traits.(Hasin et al., 2017) This might also apply to molecular traits, gene expression in our case, where the integration of genetics and epigenetics could better explain and predict inter-individual variation in transcriptional response.

In our analysis, we identified significantly more eQTLs with joint modeling across multiple drug treatment conditions. This is important as tissues from minority populations, in our case African Americans, are rare in biomedical research, leading to much smaller cohort sizes than seen with other populations. Hence the ability to increase the power to detect associations in minority populations is crucial to bring equity to precision medicine. We demonstrated that we can increase the ability to detect eQTLs by introducing additional variation into the transcriptome, leveraging drug perturbation thus maximizing the information we can gather from a relatively small cohort. This learned lesson encourages inclusion of minority population samples with a relatively small sample size. Many times, non-European samples are removed from large scale multi-omic studies due to limited power, further limiting the transferability of many genomic discoveries.

Drug treatment also reveals novel regulators of important DMEs, such as *CYP3A5* and *UGT1A4*, which do not have any eQTLs identified in the baseline condition or within GTEx liver. In general, we found these eQTLs have increased effect sizes after drug treatments. This first suggests that using eQTLs mapped in the baseline condition may miss important regulatory variation. Second, the increased effect size indicates an enlarged difference in gene expression among individuals with different genotypes after drug exposure. In other words, individuals carrying a certain genotype have greater induced gene expression compared to individuals with the alternative genotype. Given the common occurrence of multiple medications to treat co-morbid conditions, drug exposures may amplify the regulatory effect of some genetic variants. We showed that reQTLs showed higher ORs for overlap with several TFBS, such as GABPA and REST, as compared to non-reQTLs. This suggests one of the potential mechanisms

underlying differential gene induction is through recruitment of transcription factor binding. More analysis and types of molecular profiling are needed to examine other potential mechanisms such as histone modification, enhancer activity and DNA methylation (Pai et al., 2015).

In our analysis, we identified a putative regulatory variant of *CYP3A5*. The CYP3A enzymes are thought to metabolize approximate 50% of drugs on the market. The amount of CYP3A5 protein varies in human liver, and the low or absent levels of this enzyme in most European ancestry populations. Because of the overall lack of *CYP3A5* expression in European populations, the impact of CYP3A5 has not been comprehensively studied. CYP3A5 is the main metabolizing enzyme of tacrolimus, which is the drug used to suppress the immune system after solid organ transplantation. Because of the drug's narrow therapeutic index and high between-patient variability, it is important to individualize initial tacrolimus dose based on CYP3A5 genotypes. The current known *CYP3A5* variants, *CYP3A5\*3* (a splice variant which results in a non-functional enzyme) has been shown to explain only 45% of the variability of tacrolimus dose (Birdwell et al., 2015). African Americans require a higher dose of tacrolimus mostly due to the lower frequency of the *CYP3A5\*3* allele in African populations. (Liu et al., 2019). We found a novel variant, rs61017966, located within an enhancer region which also overlaps with active histone markers and various TFBS. Adding rs61017966 to the known splice variant explain significantly more variability in *CYP3A5* expression, suggesting that this variant might improve genotype-guided tacrolimus dosing, but may have broader implication as few studies have explored how increase expression of CYP3A5 may impact drug dosing and adverse events. This is especially relevant to African Ancestry populations that express more CYP3A5 enzyme.(Lamba et al., 2002)

Our study has some limitations. First, we did not provide experimental validation of the regulatory effect of identified reQTLs. More functional analysis is needed to confirm the causal effect of rs61017966 within a relevant cellular or animal model. Second, we were restricted to a limited sample size of hepatocytes due to the rarity of livers from African American donors. It should be noted that this study quadrupled the amount of matched genotype and gene expression data available in African ancestry individuals as compared to large databases such as GTEx (15AA in GTEx). Regulatory variants of other

important DMEs might be revealed with larger sample size. Finally, we used cultured primary hepatocytes. This *in vitro* model may not represent gene expression of hepatocytes *in vivo*.

In summary, our study comprehensively characterized the biological response to drug treatment at transcriptional and genetic regulatory levels across different enzyme inducers in African Americans. Leveraging drug treatments provides an advantage to identify novel regulatory variants of important DMEs. We uncovered putative regulatory variants that might improve drug dosing with population differentiated response. Our work enhances the understanding of genetic regulation of gene expression and contributes to increasing equality in personalized genomic medicine.

## Methods

### Drug treatment of primary hepatocyte cultures:

The procurement of 62 hepatocyte cultures was described in Zhong *et al* (Zhong et al., 2020). Hepatocyte suspensions ( $0.6 \times 10^6$  cells in 0.5 mL of CP medium) were added to collagen-coated wells of a 24-well plate followed by incubation at 37° C for 4-5 hours to allow cells to adhere. The CP medium was replaced with 0.5 mL of 0.25 mg/mL matrigel solution in HI medium, and plates were incubated overnight at 37° C. The following day, matrigel-medium was replaced with 0.5 mL of induction drug in HI medium with antibiotics and the step was repeated for the next two consecutive days after every 24 hours. We performed the induction experiments using the following six drugs: Omeprazole (50  $\mu$ M), Phenobarbital sodium (1 mM), Dexamethasone (50  $\mu$ M), Carbamazepine (50  $\mu$ M), Phenytoin (75  $\mu$ M), Rifampicin (25  $\mu$ M). Baseline hepatocytes were treated with DMSO.

### Differential gene expression (DGE) analysis:

Gene expression and genotyping data were prepared as described in Zhong *et al* (Zhong et al., 2020). Here we used expression data for baseline and six unique drug treatments. We calculated transcript per million (TPM) by first normalizing the counts by gene length (HGCR38) and then normalizing by read depth (Wagner et al., 2012). Samples were clustered through PCA to determine outliers and 2 samples were removed after this QC step. Gene expression values were filtered to retain genes with > 0.1 TPM in at least 10% of samples and  $\geq 6$  read counts in at least 10% of samples across seven conditions.

We retained only protein coding genes and long non-coding RNAs, resulting in a total of 15,579 genes that were used in the subsequent analyses.

We used weighted trimmed mean of M-values algorithm (TMM) implemented in edgeR (Robinson et al., 2010) to estimate the RNA sequencing library size. Then we calculated the counts per million (CPM) and performed log transformation with voom function implemented in Limma which accounts for estimated library sizes (Smyth et al., 2011). The estimated mean-variance trend was incorporated as precision weights in the model fitting by lmFit in Limma. To identify differentially expressed (DE) genes, we used a paired sample design to compare the expression before and after drug treatments for each individual. We used the empirical Bayes method implemented in Limma to test for DE between all pairs of conditions, with significance prespecified as by  $FDR < 0.01$  and log fold change  $\leq 0.5$ .

#### **Gene set enrichment analysis:**

Enrichment of DE genes in biological process ontologies was performed using clusterProfiler (Yu et al., 2012) using all expressed genes in all conditions ( $N = 15,579$ ) as background. We used the FDR method for multiple test correction. We used gProfileR (Raudvere et al., 2019) to test whether regions surrounding the DE genes are enriched for specific TF binding.

#### **Variance partition analysis:**

We combined all 7 gene expression datasets and utilized a linear mixed model to partition the variation in gene expression to various contributing factors using the normalized gene expression data after voom transformation. We modeled the effects of the condition, individual, sex, and potential confounding factors (batch and sequencing platform) as random effects and age and ancestry as fixed effects. This analysis was performed using the VariancePartition R package (Hoffman and Schadt, 2016).

#### **Cross-treatment eQTL analysis:**

We used Meta-Tissue developed by Sul *et al.* to jointly estimate eQTLs across conditions by integrating the mixed model and meta-analysis (Sul et al., 2013). Because of our experimental design, expression data was measured for the same hepatocyte culture under different conditions. Therefore,

expression measurements are correlated across conditions which violates the assumption of independence of studies in meta-analysis. Meta-Tissue removes this correlation between estimates of effect size before meta-analysis. First, Meta-Tissue estimates the effect size of each SNP in each condition using a linear mixed method to account for the sample sharing.

$$Y_g = \mathbf{1}\alpha + X_i\beta + \mathbf{u} + \mathbf{e}$$

Here  $Y_g$  is the expression vector of dimension  $NT \times 1$  where  $N$  is the number of samples and  $T$  is the number of conditions,  $\alpha \in R^T$  is the intercept vector,  $X_i$  is the genotype for variant  $i$ ,  $\beta \in R^T$  is the coefficient vector,  $\mathbf{u} \sim \mathcal{N}(0, \sigma_v^2 \mathbf{D})$  is the random effect of dimension  $NT \times NT$  where  $\mathbf{D}$  corresponds to the sample sharing and  $\mathbf{e} \sim \mathcal{N}(0, \sigma_e^2 \mathbf{I})$  is the random error of dimension  $NT \times NT$ . Meta-Tissue uses the generalized least square to estimate  $\beta$  and  $\text{var}(\beta)$ . Next, the  $\Omega = \text{var}(\hat{\beta})$  is replaced by  $\text{var}_{new}(\hat{\beta}) = \text{diag}(\Omega^{-1}\mathbf{e})^{-1}$  to “uncorrelated” the  $\hat{\beta}$  where  $\mathbf{e}$  is a vector of ones. Third, the “uncorrelated”  $\hat{\beta}$  are used in the regular meta-analysis.

Meta-Tissue uses Metasoft (Han and Eskin, 2011) for meta-analysis which can perform with both fixed effect (FE) and random effects (RE) models. Fixed effect model assumes that there is one true effect size that underlies all the studies in the analysis. Random effect model assumes the effect sizes can vary by studies. We performed both analysis since we hypothesized eQTLs may have either fixed or random effect. Metasoft provides betas and standard error estimates. Meta-Tissue estimates the heterogeneity with  $I^2$ , where  $I^2 = 100\% \times (Q - \text{df}) / Q$  where  $Q$  is the chi-squared statistics and  $\text{df}$  is the degrees of freedom. Finally, Meta-Tissue computes an  $m$ -value which estimates the posterior probability of an eQTL being present in each condition by taking information across conditions to explicitly reveal the sharing pattern of eQTLs.

For each treatment condition, we filtered gene expression to retain genes with  $> 0.1$  TPM in at least 20% of samples and  $\geq 6$  reads in at least 20% of samples. We normalized expression values across samples by TMM implemented in edgeR. After TMM normalization, we performed the inverse normal transformation for each gene expression profile. We estimated probabilistic estimation of expression



residuals (PEER) variables on normalized expression in order to remove any potential confounding factors. (Stegle et al., 2012)

We performed eQTL mapping on 60 hepatocyte cultures that passed both genotype and RNA-sequencing QCs. The genotype data was processed as described in Zhong et al. with 7,180,502 SNPs in total. (Zhong et al., 2020) There were 415 expression profiles across all conditions including baseline. Five gene expression profiles were not included in the analysis due to insufficient hepatocytes to conduct all drug treatments or inadequate/poor quality mRNA to conduct sequencing. We used 17,949 genes that were expressed in any conditions. We first regressed the top 10 PEER variables from the gene expression profiles leaving the expression residual. The number of PEER variables was chosen to optimize the number of detected eGenes in the baseline condition as described in Zhong et al. (Zhong et al., 2020) We then used Meta-Tissue linear mixed model to obtain the estimates of effects and standard error for each gene residual-cis SNP pair (restricted to SNP with 1Mb for the gene start position). We included additional covariates: sex, platform, batch and the first principal component calculated from genotype data to correct for potential known confounding effects following Zhong et al.

#### **Treatment-by-treatment eQTL analysis:**

We also performed treatment-by-treatment (TBT) analysis - which was conducted to find eQTLs in each condition separately. The p values were calculated from fitting multivariate linear regression of gene residual  $\sim$  genotype + sex + platform + batch + PC1. We used a hierarchical correction method to adjust the nominal p values and to call the eGenes and eQTLs as described in Zhong *et al.* Firstly, p values of all cis SNPs are adjusted for multiple testing for each gene using Benjamini and Yekutieli (BY) method as the locally adjusted p values. Secondly, the minimum BY-adjusted p values for all genes are corrected using Benjamini and Hochberg method (BH) as the globally adjusted p values (BY-BH p values). Lastly, for a chosen threshold (here we use, 0.05), we found the largest BY-BH p values under that threshold and the corresponding BY-adjusted p value. This BY-adjusted p-value is used as the threshold to call significant eQTLs. These results were compared to those found in the Cross-treatment eQTL analysis.

### Identification of response QTLs (reQTLs):

We used a beta-comparison approach to identify reQTLs which are eQTLs with altered effect size after drug treatment. We used the beta estimates ( $\beta$ ), standard deviation of beta estimates ( $\text{var}(\beta)$ ) and correlation of beta estimates ( $\text{cor}(\beta)$ ) that were computed in the Meta-Tissue linear mixed model to compare the beta estimates in drug treatment conditions with the baseline condition. We compared the beta estimates in two conditions using a z test similar to Kim-Hellmuth et al. Here  $\beta_2$ ,  $\text{sd}_2$  are the estimates with drug treatment;  $\beta_1$ ,  $\text{sd}_1$  are the estimates in the baseline condition; and  $\text{cor}_{12}$  is the correlation of  $\beta_1$  and  $\beta_2$  estimates from  $\text{var}(\beta)$  of Meta-Tissue. We then calculated the Z statistics as:

$$Z \text{ statistics} = \frac{(\beta_2 - \beta_1)}{\sqrt{\text{sd}_1^2 + \text{sd}_2^2 - 2 * \text{cor}_{12} * \sqrt{(\text{sd}_1^2 * \text{sd}_2^2)}}}$$

We calculated the Z statistics for all eQTLs mapped in the Meta-Tissue fix effect model, random effect model and TBT analysis. To identify significant reQTLs, we randomly permute the expression across different conditions for each individual. This method maintains the relationship between genotype and expression. However, the effect size of the genotype is now randomly assigned with respect to each condition. We then compute the null z statistics after each permutation. We repeat the permutation 100 times and for each eQTL association test and calculate the empirical p value based on the null z statistics distribution using the qvalue R package (Dabney et al., 2010). We then calculate the q value across all empirical p values and used q value < 0.05 as the cutoff to select significant reQTLs. We performed the multiple-testing correction separately for each drug treatment condition.

### Mapping (log fold change QTL) lfc\_eQTL:

Here we used the log(CPM) values calculated with limma voom. We first adjusted the effects of batch and the sequencing platform in the data. We estimated any remaining confounding factors with SVA and regressed out these surrogate variables from the log(CPM) values. (Leek et al., 2012) We then calculated the difference of log(CPM) between drug each treatment and baseline representing the log fold-change (lfc) of gene expression and performed inverse normal transformation. We used normalized

lfc as the gene expression phenotype in eQTL analysis. We used Matrix eQTL to map lfc\_eQTL after adjusting for the first genotype PCs and sex as covariates. We used hierarchical multiple test correction as described previously in the TBT eQTL analysis.

### **Enrichment of eQTLs in transcription factor binding sites (TFBS):**

Using ENCODE transcription factor ChIP-Seq data from human liver tissue, we identified the number of eQTLs that overlap with the ChIP-Seq narrow peaks (representing transcription factor binding). We randomly sampled 1000 sets of null SNPs that were matched for LD score, minor allele frequency and distance to the nearest gene for each of the eQTL. We then calculated the average overlap between these null SNPs and ChIP-Seq narrow peaks across 1000 different null sets. We used the Fisher exact test to compute the odds ratio and p-value comparing the overlap of eQTLs with the overlap of null SNPs.

### **Fixation index (Fst) analysis:**

We calculated the Fst for eQTLs using 1000 Genomes Yoruba people of Ibadan, Nigeria (YRI) and Utah Residents (CEPH) with Northern and Western European Ancestry (CEU) populations with the GCTA software (Yang et al., 2011). Fst measures the population differences in of SNP allele frequency, with higher values denoting large differences in frequency. We compared the Fst of reQTLs to the Fst of non-reQTLs with Wilcoxon rank sum test.

### **Acknowledgements**

We would like to thank Drs. Alfred L. George, Jr, Eric Gamazon and Barbara Stranger for many useful discussions and comments. This work was supported by the National Institute of Health (NIH)/National Institute on Minority Health and Health Disparities (NIMHD) grant R01 MD009217 and U54 MD010723.

### **Competing Interest**

There are no competing interest for the any author.

### **Author Contributions**

M.A.P. and Y.Z. conceived this study and wrote the paper. Y.Z. performed the analysis. T.D., M.A.P, J.A. and C.A. curated the data.

### **Declaration of Interests**

The authors declare that they have no competing interest.

## References:

2018. Diversifying clinical trials. *Nature Medicine*, 24, 1779-1779.
- ALEKSUNES, L. M. & KLAASSEN, C. D. 2012. Coordinated regulation of hepatic phase I and II drug-metabolizing genes and transporters using AhR-, CAR-, PXR-, PPARalpha-, and Nrf2-null mice. *Drug Metab Dispos*, 40, 1366-79.
- BACOS, K., GILLBERG, L., VOLKOV, P., OLSSON, A. H., HANSEN, T., PEDERSEN, O., GJESING, A. P., EIBERG, H., TUOMI, T. & ALMGREN, P. 2016. Blood-based biomarkers of age-associated epigenetic changes in human islets associate with insulin secretion and diabetes. *Nature communications*, 7, 1-13.
- BARREIRO, L. B., TAILLEUX, L., PAI, A. A., GICQUEL, B., MARIONI, J. C. & GILAD, Y. 2012. Deciphering the genetic architecture of variation in the immune response to Mycobacterium tuberculosis infection. *Proceedings of the National Academy of Sciences*, 109, 1204-1209.
- BIRDWELL, K. A., DECKER, B., BARBARINO, J. M., PETERSON, J. F., STEIN, C. M., SADEE, W., WANG, D., VINKS, A. A., HE, Y. & SWEN, J. J. 2015. Clinical Pharmacogenetics Implementation Consortium (CPIC) guidelines for CYP3A5 genotype and tacrolimus dosing. *Clinical Pharmacology & Therapeutics*, 98, 19-24.
- BISWAS, M., SUKASEM, C., KHATUN KALI, M. S. & IBRAHIM, B. 2022. Effects of the CYP2C19 LoF allele on major adverse cardiovascular events associated with clopidogrel in acute coronary syndrome patients undergoing percutaneous coronary intervention: a meta-analysis. *Pharmacogenomics*, 23, 207-220.
- COOKSON, W., LIANG, L., ABECASIS, G., MOFFATT, M. & LATHROP, M. 2009. Mapping complex disease traits with global gene expression. *Nature Reviews Genetics*, 10, 184-194.
- DABNEY, A., STOREY, J. D. & WARNES, G. 2010. qvalue: Q-value estimation for false discovery rate control. *R package version*, 1.
- DE LEON, J., DINSMORE, L. & WEDLUND, P. 2003. Adverse drug reactions to oxycodone and hydrocodone in CYP2D6 ultrarapid metabolizers. *J Clin Psychopharmacol*, 23, 420-1.
- DEAVALL, D. G., MARTIN, E. A., HORNER, J. M. & ROBERTS, R. 2012. Drug-induced oxidative stress and toxicity. *Journal of toxicology*, 2012.
- GAY, N. R., GLOUDEMANS, M., ANTONIO, M. L., ABELL, N. S., BALLIU, B., PARK, Y., MARTIN, A. R., MUSHAROFF, S., RAO, A. S., AGUET, F., BARBEIRA, A. N., BONAZZOLA, R., HORMOZDIARI, F., CONSORTIUM, G. T., ARDLIE, K. G., BROWN, C. D., IM, H. K., LAPPALAINEN, T., WEN, X. & MONTGOMERY, S. B. 2020. Impact of admixture and ancestry on eQTL analysis and GWAS colocalization in GTEx. *Genome Biol*, 21, 233.
- GONG, H., SINGH, S. V., SINGH, S. P., MU, Y., LEE, J. H., SAINI, S. P., TOMA, D., REN, S., KAGAN, V. E. & DAY, B. W. 2006. Orphan nuclear receptor pregnane X receptor sensitizes oxidative stress responses in transgenic mice and cancerous cells. *Molecular endocrinology*, 20, 279-290.
- GONG, L., WHIRL-CARRILLO, M. & KLEIN, T. E. 2021. PharmGKB, an Integrated Resource of Pharmacogenomic Knowledge. *Curr Protoc*, 1, e226.
- GONG, Y., WANG, Z., BEITELSHEES, A. L., MCDONOUGH, C. W., LANGAEE, T. Y., HALL, K., SCHMIDT, S. O., CURRY, R. W., JR., GUMS, J. G., BAILEY, K. R., BOERWINKLE, E., CHAPMAN, A. B., TURNER, S. T., COOPER-DEHOFF, R. M. & JOHNSON, J. A. 2016. Pharmacogenomic Genome-Wide Meta-Analysis of Blood Pressure Response to beta-Blockers in Hypertensive African Americans. *Hypertension*, 67, 556-63.
- HAN, B. & ESKIN, E. 2011. Random-effects model aimed at discovering associations in meta-analysis of genome-wide association studies. *Am J Hum Genet*, 88, 586-98.
- HASIN, Y., SELDIN, M. & LUSIS, A. 2017. Multi-omics approaches to disease. *Genome biology*, 18, 1-15.

- HOFFMAN, G. E. & SCHADT, E. E. 2016. variancePartition: interpreting drivers of variation in complex gene expression studies. *BMC bioinformatics*, 17, 483.
- HOU, Y., HU, Q., HUANG, J. & XIONG, H. 2018. Omeprazole inhibits cell proliferation and induces G0/G1 cell cycle arrest through up-regulating miR-203a-3p expression in Barrett's esophagus cells. *Frontiers in Pharmacology*, 8, 968.
- JANCOVA, P., ANZENBACHER, P. & ANZENBACHEROVA, E. 2010. Phase II drug metabolizing enzymes. *Biomed Pap Med Fac Univ Palacky Olomouc Czech Repub*, 154, 103-16.
- KIM-HELLMUTH, S., BECHHEIM, M., PÜTZ, B., MOHAMMADI, P., NÉDÉLEC, Y., GIANGRECO, N., BECKER, J., KAISER, V., FRICKER, N. & BEIER, E. 2017. Genetic regulatory effects modified by immune activation contribute to autoimmune disease associations. *Nature communications*, 8, 1-10.
- KLOTZ, L.-O. & STEINBRENNER, H. 2017. Cellular adaptation to xenobiotics: Interplay between xenosensors, reactive oxygen species and FOXO transcription factors. *Redox biology*, 13, 646-654.
- KNOWLES, D. A., BURROWS, C. K., BLISCHAK, J. D., PATTERSON, K. M., SERIE, D. J., NORTON, N., OBER, C., PRITCHARD, J. K. & GILAD, Y. 2018. Determining the genetic basis of anthracycline-cardiotoxicity by molecular response QTL mapping in induced cardiomyocytes. *Elife*, 7, e33480.
- KRANZLER, H. R., LYNCH, K. G., CRIST, R. C., HARTWELL, E., LE MOIGNE, A., LAFFONT, C. M. & ANDORN, A. C. 2021. A Delta-Opioid Receptor Gene Polymorphism Moderates the Therapeutic Response to Extended-Release Buprenorphine in Opioid Use Disorder. *Int J Neuropsychopharmacol*, 24, 89-96.
- LAMBA, J., HEBERT, J. M., SCHUETZ, E. G., KLEIN, T. E. & ALTMAN, R. B. 2012. PharmGKB summary: very important pharmacogene information for CYP3A5. *Pharmacogenetics and genomics*, 22, 555.
- LAMBA, J. K., LIN, Y. S., SCHUETZ, E. G. & THUMMEL, K. E. 2002. Genetic contribution to variable human CYP3A-mediated metabolism. *Adv Drug Deliv Rev*, 54, 1271-94.
- LEE, N., KIM, D.-K., HAN, S. H., RYU, H. G., PARK, S. J., KIM, K.-T. & CHOI, K. Y. 2017. Comparative Interactomes of VRK1 and VRK3 with their distinct roles in the cell cycle of liver cancer. *Molecules and cells*, 40, 621.
- LEEK, J. T., JOHNSON, W. E., PARKER, H. S., JAFFE, A. E. & STOREY, J. D. 2012. The sva package for removing batch effects and other unwanted variation in high-throughput experiments. *Bioinformatics*, 28, 882-3.
- LIN, Y., LAI, X., CHEN, B., XU, Y., HUANG, B., CHEN, Z., ZHU, S., YAO, J., JIANG, Q. & HUANG, H. 2011. Genetic variations in CYP17A1, CACNB2 and PLEKHA7 are associated with blood pressure and/or hypertension in She ethnic minority of China. *Atherosclerosis*, 219, 709-714.
- LIU, J., LU, Y. F., CORTON, J. C. & KLAASSEN, C. D. 2021. Expression of cytochrome P450 isozyme transcripts and activities in human livers. *Xenobiotica*, 51, 279-286.
- LIU, Y., ZHANG, C., LI, L., OU, B., YUAN, L., ZHANG, T., FAN, J. & PENG, Z. 2019. Genome-Wide Association Study of Tacrolimus Pharmacokinetics Identifies Novel Single Nucleotide Polymorphisms in the Convalescence and Stabilization Periods of Post-transplant Liver Function. *Frontiers in Genetics*, 10, 528.
- MANGRAVITE, L. M., ENGELHARDT, B. E., MEDINA, M. W., SMITH, J. D., BROWN, C. D., CHASMAN, D. I., MECHAM, B. H., HOWIE, B., SHIM, H. & NAIDOO, D. 2013. A statin-dependent QTL for GATM expression is associated with statin-induced myopathy. *Nature*, 502, 377-380.
- MARTELLA, E., BELLOTTI, C., DOZZA, B., PERRONE, S., DONATI, D. & LUCARELLI, E. 2014. Secreted adiponectin as a marker to evaluate in vitro the adipogenic differentiation of human mesenchymal stromal cells. *Cytotherapy*, 16, 1476-1485.
- MEHANNA, M., GONG, Y., MCDONOUGH, C. W., BEITELSHEES, A. L., GUMS, J. G., CHAPMAN, A. B., SCHWARTZ, G. L., JOHNSON, J. A., TURNER, S. T. & COOPER-DEHOFF, R. M. 2017. Blood pressure response to metoprolol and chlorthalidone in European and African Americans with hypertension. *J Clin Hypertens (Greenwich)*, 19, 1301-1308.
- MIMURA, I. 2019. Kidney aging: an irresistible slope. *Kidney international*, 95, 492-494.

- NÉDÉLEC, Y., SANZ, J., BAHARIAN, G., SZPIECH, Z. A., PACIS, A., DUMAINE, A., GRENIER, J.-C., FREIMAN, A., SAMS, A. J. & HEBERT, S. 2016. Genetic ancestry and natural selection drive population differences in immune responses to pathogens. *Cell*, 167, 657-669. e21.
- PAI, A. A., PRITCHARD, J. K. & GILAD, Y. 2015. The genetic and mechanistic basis for variation in gene regulation. *PLoS Genet*, 11, e1004857.
- PAZ, M. F. C. J., DE ALENCAR, M. V. O. B., DE LIMA, R. M. P., SOBRAL, A. L. P., DO NASCIMENTO, G. T. M., DOS REIS, C. A., COELHO, M. D. P. S. D. S., DO NASCIMENTO, M. L. L. B., GOMES JÚNIOR, A. L. & MACHADO, K. D. C. 2020. Pharmacological Effects and Toxicogenetic Impacts of Omeprazole: Genomic Instability and Cancer. *Oxidative Medicine and Cellular Longevity*, 2020.
- PERERA, M. A., CAVALLARI, L. H., LIMDI, N. A., GAMAZON, E. R., KONKASHBAEV, A., DANESHJOU, R., PLUZHNIKOV, A., CRAWFORD, D. C., WANG, J. & LIU, N. 2013. Genetic variants associated with warfarin dose in African-American individuals: a genome-wide association study. *The Lancet*, 382, 790-796.
- PRAKASH, C., ZUNIGA, B., SONG, C. S., JIANG, S., CROPPER, J., PARK, S. & CHATTERJEE, B. 2015. Nuclear receptors in drug metabolism, drug response and drug interactions. *Nuclear receptor research*, 2.
- RAUDVERE, U., KOLBERG, L., KUZMIN, I., ARAK, T., ADLER, P., PETERSON, H. & VILO, J. 2019. g: Profiler: a web server for functional enrichment analysis and conversions of gene lists (2019 update). *Nucleic acids research*, 47, W191-W198.
- RELLING, M. & KLEIN, T. 2011. CPIC: clinical pharmacogenetics implementation consortium of the pharmacogenomics research network. *Clinical Pharmacology & Therapeutics*, 89, 464-467.
- ROBINSON, M. D., MCCARTHY, D. J. & SMYTH, G. K. 2010. edgeR: a Bioconductor package for differential expression analysis of digital gene expression data. *Bioinformatics*, 26, 139-140.
- SAMEDY-BATES, L. A., OH, S. S., NUCKTON, T. J., ELHAWARY, J. R., WHITE, M., ELLIOT, T., ZEIGER, A. M., ENG, C., SALAZAR, S., LENOIR, M. A., MEADE, K., FARBER, H. J., SEREBRISKY, D., BRIGINO-BUENAVENTURA, E., RODRIGUEZ-CINTRON, W., BIBBINS-DOMINGO, K., KUMAR, R., THYNE, S., BORRELL, L. N., RODRIGUEZ-SANTANA, J. R., PINO-YANES, M. & BURCHARD, E. G. 2019. Racial/Ethnic-Specific Differences in the Effects of Inhaled Corticosteroid Use on Bronchodilator Response in Patients With Asthma. *Clin Pharmacol Ther*, 106, 1133-1140.
- SHEN, G. & KONG, A. N. 2009a. Nrf2 plays an important role in coordinated regulation of Phase II drug metabolism enzymes and Phase III drug transporters. *Biopharmaceutics & drug disposition*, 30, 345-355.
- SHEN, G. & KONG, A. N. 2009b. Nrf2 plays an important role in coordinated regulation of Phase II drug metabolism enzymes and Phase III drug transporters. *Biopharm Drug Dispos*, 30, 345-55.
- SHEPHERD, G., MOHORN, P., YACOUB, K. & MAY, D. W. 2012. Adverse drug reaction deaths reported in United States vital statistics, 1999-2006. *Ann Pharmacother*, 46, 169-75.
- SMYTH, G., RITCHIE, M. & THORNE, N. 2011. Linear models for microarray data user's guide. *Bioinformatics*, 20, 3705-3706.
- STEGLE, O., PARTS, L., PIIPARI, M., WINN, J. & DURBIN, R. 2012. Using probabilistic estimation of expression residuals (PEER) to obtain increased power and interpretability of gene expression analyses. *Nat Protoc*, 7, 500-7.
- SUL, J. H., HAN, B., YE, C., CHOI, T. & ESKIN, E. 2013. Effectively identifying eQTLs from multiple tissues by combining mixed model and meta-analytic approaches. *PLoS Genet*, 9, e1003491.
- WAGNER, G. P., KIN, K. & LYNCH, V. J. 2012. Measurement of mRNA abundance using RNA-seq data: RPKM measure is inconsistent among samples. *Theory in biosciences*, 131, 281-285.
- YANG, J., LEE, S. H., GODDARD, M. E. & VISSCHER, P. M. 2011. GCTA: a tool for genome-wide complex trait analysis. *The American Journal of Human Genetics*, 88, 76-82.
- YU, G., WANG, L.-G., HAN, Y. & HE, Q.-Y. 2012. clusterProfiler: an R package for comparing biological themes among gene clusters. *Omics: a journal of integrative biology*, 16, 284-287.



- ZANGER, U. M. & SCHWAB, M. 2013. Cytochrome P450 enzymes in drug metabolism: regulation of gene expression, enzyme activities, and impact of genetic variation. *Pharmacology & therapeutics*, 138, 103-141.
- ZHANG, H. F., ZHU, L. L., YANG, X. B., GAO, N., FANG, Y., WEN, Q. & QIAO, H. L. 2021. Variation in the expression of cytochrome P450-related miRNAs and transcriptional factors in human livers: Correlation with cytochrome P450 gene phenotypes. *Toxicol Appl Pharmacol*, 412, 115389.
- ZHONG, Y., DE, T., ALARCON, C., PARK, C. S., LEC, B. & PERERA, M. A. 2020. Discovery of novel hepatocyte eQTLs in African Americans. *PLoS genetics*, 16, e1008662.



| Gene.stable.ID  | Chromosome.scaffold.name | Gene.start..bp. | Gene.end..bp. | Gene.type      | HGNC.symbol | length | Omeprazole-Baseline_lfc | Omeprazole-Baseline_p | Omeprazole-Baseline_FDR |
|-----------------|--------------------------|-----------------|---------------|----------------|-------------|--------|-------------------------|-----------------------|-------------------------|
| ENSG00000004455 | 1                        | 33007940        | 33080996      | protein_coding | AK2         | 73056  | 0.1676122879403391      | 9.3929129689118e-18   | 1.95169374123176e-17    |
|                 |                          |                 |               |                |             |        | 0.2734398449179712      | 4.1208985773302e-40   | 1.16340395955488e-38    |
|                 |                          |                 |               |                |             |        | 0.0969634847242125      | 1.3638458163027e-07   | 1.92632402286308e-06    |
|                 |                          |                 |               |                |             |        | 0.0751646352263267      | 4.18299393948564e-05  | 0.000572141023557917    |
|                 |                          |                 |               |                |             |        | 0.1204673556707241      | 3.1126005001599e-10   | 4.19468589716615e-09    |
|                 |                          |                 |               |                |             |        | 0.0973385800965145      | 1.23558227935807e-07  | 9.35786890137062e-07    |
| ENSG00000004478 | 12                       | 2794953         | 2805423       | protein_coding | FKBP4       | 10470  | 0.3738289273736135      | 4.3577143738173e-44   | 9.40932035810777e-42    |
|                 |                          |                 |               |                |             |        | 0.3450807412790775      | 4.5199127782827e-39   | 2.38585876733951e-37    |
|                 |                          |                 |               |                |             |        | 0.1325861860530062      | 2.4986985291266e-08   | 4.30232874463615e-07    |
|                 |                          |                 |               |                |             |        | 0.1095248176560633      | 3.95960695865888e-06  | 8.35039299550075e-05    |
|                 |                          |                 |               |                |             |        | 0.1389606322383037      | 6.1336298382306e-09   | 1.60281867466188e-07    |
|                 |                          |                 |               |                |             |        | 0.2376196120157461      | 1.06308095158184e-21  | 4.65217363614987e-20    |
| ENSG00000004864 | 7                        | 96120220        | 96322147      | protein_coding | SLC25A13    | 201927 | 0.1101045534845775      | 3.9727998828515e-06   |                         |
|                 |                          |                 |               |                |             |        | 1.48322852244654e-05    | 0.4408691629479932    | 5.111350024406e-54      |
|                 |                          |                 |               |                |             |        | 3.52441191018217e-52    | 0.1328529524888044    | 2.7050521184712e-08     |
|                 |                          |                 |               |                |             |        | 6.894321315582e-07      | 0.1570589133790581    | 5.7186140665254e-10     |
|                 |                          |                 |               |                |             |        | 1.8982968104062e-08     | 0.17527412246849      | 1.64854777930248e-12    |
|                 |                          |                 |               |                |             |        | 8.2847502754043e-11     | 0.3049204836393391    | 9.8565276975257e-31     |
|                 |                          |                 |               |                |             |        | 1.98297977563945e-29    |                       |                         |
| ENSG00000005022 | X                        | 119468400       | 119471319     | protein_coding | SLC25A5     | 2919   | 0.0995561723171887      | 2.21339029957173e-06  |                         |
|                 |                          |                 |               |                |             |        | 6.37972386253988e-06    | 0.4837845874505832    | 0.4964931705938e-74     |
|                 |                          |                 |               |                |             |        | 1.33047861293617e-71    | 0.0794547280090194    | 0.000135557100004385    |
|                 |                          |                 |               |                |             |        | 0.000843509624362648    | 0.1642884798796762    | 5.8617288105779e-14     |
|                 |                          |                 |               |                |             |        | 8.05799746279986e-12    | 0.2420497502828038    | 0.05698063189818e-27    |
|                 |                          |                 |               |                |             |        | 3.58627717898119e-24    | 0.3192595821681145    | 5.7284442354964e-42     |
|                 |                          |                 |               |                |             |        | 1.15759124365973e-39    |                       |                         |
| ENSG00000005486 | 7                        | 75842602        | 75888926      | protein_coding | RHBDD2      | 46324  | 0.2149604420125182      | 9.845747596422e-20    | 3.63823866826806e-19    |
|                 |                          |                 |               |                |             |        | 0.21592488847886        | 2.05398312109947e-20  | 2.07920747521824e-19    |
|                 |                          |                 |               |                |             |        | 0.1713561259827844      | 4.96054143255385e-14  | 2.5887565671769e-12     |
|                 |                          |                 |               |                |             |        | 0.0902721871041834      | 4.86905184985879e-05  | 0.000650885715873647    |
|                 |                          |                 |               |                |             |        | 0.1662903717607293      | 7.9476600177697e-13   | 2.25261598223634e-11    |
|                 |                          |                 |               |                |             |        | 0.16842719857102        | 1.25544491754005e-13  | 2.21752566557328e-12    |
| ENSG00000007923 | 1                        | 6634168         | 6701924       | protein_coding | DNAJC11     | 67756  | 0.1927491561409974      | 1.1761725223604e-37   | 2.96983144317524e-35    |
|                 |                          |                 |               |                |             |        | 0.1720230845469164      | 3.951324922517e-31    | 1.02656325482443e-29    |
|                 |                          |                 |               |                |             |        | 0.0730899599257979      | 5.8762505656478e-08   | 1.42117612517814e-06    |
|                 |                          |                 |               |                |             |        | 0.0474832743990277      | 0.000486154800030612  | 0.00406975047269044     |
|                 |                          |                 |               |                |             |        | 0.1022495533947083      | 6.3107672577725e-13   | 2.1757132427263e-11     |
|                 |                          |                 |               |                |             |        | 0.0590262786471927      | 1.45620827965021e-05  | 7.40171901751081e-05    |

|                      |                      |                      |                      |                |         |
|----------------------|----------------------|----------------------|----------------------|----------------|---------|
| ENSG00000015475      | 22                   | 17734138             | 17774770             | protein_coding | BID     |
| 40632                | 0.2326920944374887   | 9.6572594297006e-14  | 5.10481466332911e-13 |                |         |
| 0.4822036046115651   | 4.6100487202589e-44  | 9.85324454601354e-43 |                      |                |         |
| 0.1421742271436392   | 6.7437355662248e-06  | 2.77575387332589e-05 |                      |                |         |
| 0.1528943455199855   | 5.32286074612491e-07 | 1.6298792745778e-05  |                      |                |         |
| 0.1106290174285010   | 0.000271309967036835 | 0.00157011068962364  |                      |                |         |
| 0.3874435206111145   | 5.08914941602968e-32 | 5.46785232774665e-30 |                      |                |         |
| ENSG00000021461      | 7                    | 99828013             | 99866102             | protein_coding | CYP3A43 |
| 38089                | 0.5138643418543391   | 4.9927553212523e-06  | 4.42120263391613e-06 |                |         |
| 1.59464517838854     | 2.4465681037867e-41  | 1.29203676233536e-39 |                      |                |         |
| 0.9319103420436571   | 7.74874344749867e-17 | 1.61205172595158e-15 |                      |                |         |
| 1.11971145900383     | 1.61663149333402e-23 | 1.57409387716567e-20 |                      |                |         |
| 1.52450142793536     | 2.88746348815431e-38 | 2.99891957879707e-35 |                      |                |         |
| 1.81386264046515     | 2.82829449100245e-50 | 9.17958330735984e-48 |                      |                |         |
| ENSG00000023330      | 3                    | 52198086             | 52214327             | protein_coding | ALAS1   |
| 16241                | 1.63433938941389     | 2.03472681205645e-59 | 1.86464758853103e-56 |                |         |
| 2.37309891300395     | 7.17307790683018e-95 | 1.86248967850846e-91 |                      |                |         |
| 0.7461211296948677   | 5.2705788662895e-18  | 7.4217743554299e-16  |                      |                |         |
| 0.8390894470326461   | 1.77021011084901e-21 | 1.53211685093982e-18 |                      |                |         |
| 1.23919600564185     | 1.58648539901314e-39 | 2.05965466926881e-36 |                      |                |         |
| 1.7941901255082      | 7.58538921406728e-68 | 6.95133991564437e-65 |                      |                |         |
| ENSG00000023839      | 10                   | 99782732             | 99852192             | protein_coding | ABCC2   |
| 69460                | 0.3597782095425656   | 6.05824763581213e-23 | 9.63075917533848e-22 |                |         |
| 0.9291272317107857   | 7.45175818359265e-90 | 1.1609094074219e-86  |                      |                |         |
| 0.3105901246524373   | 6.362016228722e-18   | 3.90678517811903e-16 |                      |                |         |
| 0.3653207672504951   | 1.61124402189697e-23 | 1.57409387716567e-20 |                      |                |         |
| 0.6203135847177179   | 7.78466796194043e-53 | 3.81088355447675e-49 |                      |                |         |
| 0.6093406061488123   | 3.39379653704958e-52 | 1.28955990855355e-49 |                      |                |         |
| ENSG00000023909      | 1                    | 93885205             | 93909456             | protein_coding | GCLM    |
| 24251                | 0.8061372284410411   | 1.6565355527856e-58  | 1.43373152093594e-55 |                |         |
| 0.6324987154402933   | 5.996469627748e-41   | 1.86308637983617e-39 |                      |                |         |
| 0.2763435907860397   | 1.2668102587714e-11  | 2.11587107699582e-09 |                      |                |         |
| 0.2030783628224931   | 3.5372844759465e-06  | 3.43481033958909e-05 |                      |                |         |
| 0.3667941815212414   | 3.889104399364e-17   | 5.46998685950153e-15 |                      |                |         |
| 0.2135520445833633   | 3.49866231875845e-07 | 2.4452965573772e-06  |                      |                |         |
| ENSG00000044459      | 9                    | 17134982             | 17503923             | protein_coding | CNTLN   |
| 368941               | 0.2949839460490811   | 1.51072915357924e-13 |                      |                |         |
| 9.42557047801803e-13 | 1.10569975062811     | 1.92939297881897e-96 |                      |                |         |
| 1.00193377390069e-92 | 0.2612978279709143   | 5.411590083431e-11   |                      |                |         |
| 1.11675538848132e-09 | 0.4376761518918115   | 7.1030588753324e-26  |                      |                |         |
| 8.08735049289821e-23 | 0.5025379458382543   | 5.9088045373296e-32  |                      |                |         |
| 2.43227506907417e-29 | 1.00120189725381     | 3.98891837162092e-86 |                      |                |         |
| 1.03572265519137e-82 |                      |                      |                      |                |         |
| ENSG00000058600      | 16                   | 22297375             | 22335103             | protein_coding | POLR3E  |
| 37728                | 0.2847384415413085   | 9.3016067533627e-32  | 2.45055631726959e-30 |                |         |
| 0.2716590545807961   | 1.08749486235492e-29 | 2.27410502827212e-28 |                      |                |         |
| 0.0854767379315655   | 0.000108758686181555 | 0.000701984442711925 |                      |                |         |
| 0.1200357952052728   | 3.6246182567088e-08  | 3.64926590426125e-06 |                      |                |         |
| 0.0699360874344110   | 0.00164067721114153  | 0.00726345844625571  |                      |                |         |
| 0.1037060359070513   | 0.00636913522913e-06 | 1.74177109549032e-05 |                      |                |         |
| ENSG00000060762      | 6                    | 166364919            | 166383013            | protein_coding | MPC1    |
| 18094                | 0.1644377194329711   | 1.14424228998838e-06 | 3.41824556773328e-06 |                |         |
| 0.4617966902382741   | 1.24217118830412e-35 | 4.18869803952163e-34 |                      |                |         |
| 0.2446421445101639   | 9.51103894842097e-13 | 4.02642597221332e-11 |                      |                |         |

|                 |                      |                      |                      |                           |
|-----------------|----------------------|----------------------|----------------------|---------------------------|
|                 | 0.1198710169162260   | .000352793342808358  |                      | 0.00317041755860019       |
|                 | 0.1636604817796311   | .41749276051737e-06  |                      | 1.62615020000737e-05      |
|                 | 0.4156611098601992   | .31388582833932e-30  |                      | 2.1457159118868e-28       |
| ENSG00000065054 | 16                   | 2025356              | 2039026              | protein_coding SLC9A3R2   |
|                 | 13670                | 0.5175415713987878   | .61630082563268e-33  | 3.8908217554357e-31       |
|                 | 0.3333384153480434   | .85318708795208e-16  |                      | 3.47143258233266e-15      |
|                 | 0.2222104661714012   | .5473988250452e-08   |                      | 4.37069672856599e-07      |
|                 | 0.2519838025112644   | .0722398311983e-10   |                      | 4.20141882981711e-08      |
|                 | 0.2141295347623611   | .00443647800919e-07  |                      | 1.57267496391007e-06      |
|                 | 0.1297432363036060   | .000976336659079457  |                      | 0.00325494303697814       |
| ENSG00000065057 | 16                   | 2039815              | 2047866              | protein_coding NTHL1 8051 |
|                 | 0.3047400147813531   | .54292642241284e-08  |                      | 5.75466859822113e-08      |
|                 | 0.5807906717825759   | .95500251532457e-25  |                      | 1.44403151011398e-23      |
|                 | 0.2164848011899434   | .54104330362015e-05  |                      | 0.000329193996018211      |
|                 | 0.28574484018114     | 1.0513759666791e-07  |                      | 4.42600769020917e-06      |
|                 | 0.2541236462332842   | .26664719505507e-06  |                      | 2.4711054339932e-05       |
|                 | 0.22782636304394     | 1.84637242429504e-05 |                      | 9.23126957576778e-05      |
| ENSG00000065833 | 6                    | 83210389             | 83431071             | protein_coding ME1        |
|                 | 220682               | 0.5365939395106741   | .70000472873793e-29  |                           |
|                 | 5.55227959517992e-28 | 0.6293809819934777   | .44623020635025e-38  |                           |
|                 | 3.01544406188472e-36 | 0.3463580305309331   | .60304628642901e-14  |                           |
|                 | 9.14793336859983e-13 | 0.25444646365071     | 1.07528041215143e-08 |                           |
|                 | 6.83746675139066e-07 | 0.1977060862803278   | .15950236443832e-06  |                           |
|                 | 7.5217093097979e-05  | 0.7517430981768861   | .01905826191036e-49  |                           |
|                 | 3.23998135965337e-47 |                      |                      |                           |
| ENSG00000069345 | 16                   | 46955362             | 46973788             | protein_coding DNAJA2     |
|                 | 18426                | 0.2653057188442933   | .62278791913802e-39  | 3.48391438223773e-37      |
|                 | 0.2221337173511291   | .06450787581582e-29  |                      | 2.22902798351272e-28      |
|                 | 0.1242010323885711   | .5714264712921e-11   |                      | 5.26777852583356e-10      |
|                 | 0.0792705593772434   | 1.29103194778839e-05 | 0.000221611603297693 |                           |
|                 | 0.1004467741511554   | .75568450938211e-08  |                      | 8.04438751049553e-07      |
|                 | 0.1690772147705113   | .4687112396376e-19   |                      | 1.13527421013265e-17      |
| ENSG00000074410 | 15                   | 63321378             | 63382161             | protein_coding CA12       |
|                 | 60783                | 1.10078704977037     | 2.80537301688933e-31 | 1.09536105839897e-29      |
|                 | 1.7737938310828      | 1.75571480690453e-63 |                      | 4.79864578539749e-61      |
|                 | 0.4234870520722871   | .20215372788799e-06  |                      | 1.36404609808937e-05      |
|                 | 0.5505138263478084   | .97328548255172e-10  |                      | 5.03109185277099e-08      |
|                 | 0.9513979987797721   | .43127380071322e-24  |                      | 5.06768512302527e-22      |
|                 | 1.5709668101864      | 7.0070926995442e-54  |                      | 3.03231936572775e-51      |
| ENSG00000075240 | 22                   | 46576012             | 46679790             | protein_coding GRAMD4     |
|                 | 103778               | 0.3178356691745611   | .8997295505153e-20   |                           |
|                 | 2.35636040346162e-19 | 0.43078832152649     | 1.98487999624749e-33 |                           |
|                 | 5.71579398549715e-32 | 0.2691167541713251   | .18450873097842e-15  |                           |
|                 | 8.0582801396999e-14  | 0.1712864506449881   | .96204616214034e-07  |                           |
|                 | 7.33014799999623e-06 | 0.1459209408754999   | .21960680020576e-06  |                           |
|                 | 8.34586021733908e-05 | 0.2395992825504116   | .72748170105721e-13  |                           |
|                 | 1.09174413979969e-11 |                      |                      |                           |
| ENSG00000079999 | 19                   | 10486120             | 10503741             | protein_coding KEAP1      |
|                 | 17621                | 0.3581860079261012   | .3284258258774e-37   | 1.73562420771981e-35      |
|                 | 0.2960547589626951   | .07855337793332e-27  |                      | 1.94702005502007e-26      |
|                 | 0.13526416347358     | 9.59918154459435e-08 |                      | 1.42153659014482e-06      |
|                 | 0.1093069813076671   | .56419098233441e-05  |                      | 0.000257595468433274      |
|                 | 0.1180063844805993   | .60878886794509e-06  |                      | 3.7012061733849e-05       |
|                 | 0.27275174968364     | 2.06010219989934e-24 |                      | 1.22031681263239e-22      |

|                      |                      |                      |                      |                |          |
|----------------------|----------------------|----------------------|----------------------|----------------|----------|
| ENSG00000080824      | 14                   | 102080738            | 102139699            | protein_coding | HSP90AA1 |
| 58961                | 0.28118042107981     | 1.74607539600275e-26 | 4.13405905688858e-25 |                |          |
| 0.1987099703850395   | .71905074545289e-15  | 3.74926009278464e-14 |                      |                |          |
| 0.0840989680995499   | 0.000579904705819743 | 0.00290399723946184  |                      |                |          |
| 0.1050499139502412   | .05858651636621e-05  | 0.000321672210014737 |                      |                |          |
| 0.1714226697949061   | .21155728768742e-11  | 4.91532577731312e-10 |                      |                |          |
| 0.2194070685744578   | .20824643069955e-18  | 2.32925812648212e-16 |                      |                |          |
| ENSG00000085563      | 7                    | 87503633             | 87713323             | protein_coding | ABCB1    |
| 209690               | 0.30039007609087     | 3.15943327168772e-15 |                      |                |          |
| 2.3039235838842e-14  | 1.06510033550032     | 2.72757250380914e-97 |                      |                |          |
| 2.12464260184213e-93 | 0.17111114565408     | 3.42281359510773e-06 |                      |                |          |
| 3.43804081226198e-05 | 0.2595648075090365   | .79049579214995e-12  |                      |                |          |
| 1.03689809133223e-09 | 0.3739838512491121   | .13429320940624e-21  |                      |                |          |
| 2.76111779833434e-19 | 0.8800545948549215   | .36490965116489e-78  |                      |                |          |
| 8.35799274554978e-75 |                      |                      |                      |                |          |
| ENSG00000086696      | 16                   | 82035004             | 82098534             | protein_coding | HSD17B2  |
| 63530                | 0.5988134235296781   | .69049646190423e-29  | 5.53282444958109e-28 |                |          |
| 0.6171788758826915   | .84412709994524e-31  | 1.35484607276855e-29 |                      |                |          |
| 0.1629724489842120   | .000823529749678892  | 0.00392227758185492  |                      |                |          |
| 0.1779524974871640   | .000283030881148337  | 0.00268207913467758  |                      |                |          |
| 0.2016412752622694   | .41678881619869e-05  | 0.000328758494828282 |                      |                |          |
| 0.5700925758193731   | .82810798821965e-27  | 1.36983226097669e-25 |                      |                |          |
| ENSG00000087842      | X                    | 15384799             | 15493564             | protein_coding | PIR      |
| 108765               | 0.7567956472559581   | .2370943057589e-33   |                      |                |          |
| 6.06059502811884e-32 | 0.8737936530896724   | .98165295606785e-42  |                      |                |          |
| 2.76189222073242e-40 | 0.27425503610183     | 1.6385678613278e-06  |                      |                |          |
| 1.78014286691952e-05 | 0.3103691211508617   | .5061972872151e-08   |                      |                |          |
| 3.31272089341428e-06 | 0.3235313667506372   | .47758504677553e-08  |                      |                |          |
| 4.55168601930613e-07 | 0.3958823905641431   | .0032356648609e-11   |                      |                |          |
| 1.37825471101128e-10 |                      |                      |                      |                |          |
| ENSG00000090013      | 19                   | 40447789             | 40465840             | protein_coding | BLVRB    |
| 18051                | 0.7114608750272351   | .04300166870288e-52  | 5.60307689542146e-50 |                |          |
| 1.00684146606792     | 1.77116953970353e-83 | 1.97093216136009e-80 |                      |                |          |
| 0.3221924104304223   | .17556886392426e-15  | 2.01106452565349e-13 |                      |                |          |
| 0.3088896477970234   | .34992450795012e-14  | 1.27863158319538e-11 |                      |                |          |
| 0.37625212373907     | 2.28409970744693e-19 | 4.04363515253588e-17 |                      |                |          |
| 0.3246938326072282   | .04086619112938e-15  | 4.43705015318506e-14 |                      |                |          |
| ENSG00000090273      | 1                    | 26900238             | 26946862             | protein_coding | NUDC     |
| 46624                | 0.2123048725844183   | .5658530302573e-15   | 2.58383369108737e-14 |                |          |
| 0.2297781148023672   | .60834457714895e-17  | 2.04300654436418e-16 |                      |                |          |
| 0.1230201430796552   | .47497979219147e-06  | 2.58776578406382e-05 |                      |                |          |
| 0.0944056498713257   | 0.000294168826598265 | 0.00275909461142346  |                      |                |          |
| 0.1065793099466684   | .92482959424736e-05  | 0.000361393877761562 |                      |                |          |
| 0.1440407816802734   | .1835163804815e-08   | 3.42845879492485e-07 |                      |                |          |
| ENSG00000095539      | 10                   | 100969518            | 100985871            | protein_coding | SEMA4G   |
| 16353                | 0.2364274279747441   | .7519268762478e-07   | 5.78645962788047e-07 |                |          |
| 0.44222083095506     | 7.88344606787902e-21 | 8.27045160212035e-20 |                      |                |          |
| 0.19237342583377     | 1.72779592074035e-05 | 0.000141224200677932 |                      |                |          |
| 0.1594461138610810   | .000371981634025982  | 0.00331148678656616  |                      |                |          |
| 0.2733888256162772   | .29517751938585e-09  | 5.56955927951903e-08 |                      |                |          |
| 0.5059601389480663   | .66861580307077e-26  | 2.49578015703229e-24 |                      |                |          |
| ENSG00000096384      | 6                    | 44246166             | 44253888             | protein_coding | HSP90AB1 |
| 7722                 | 0.3929687393933981   | .3964142000507e-53   | 9.06447367607908e-51 |                |          |
| 0.2099333510891843   | .22525414391474e-20  | 3.21473028202481e-19 |                      |                |          |

|                 |                      |                      |                      |                      |           |
|-----------------|----------------------|----------------------|----------------------|----------------------|-----------|
|                 | 0.1010650306896113   | .12814770859028e-06  | 3.16656355764314e-05 |                      |           |
|                 | 0.11204769023303     | 2.93241489136616e-07 | 1.00184411387266e-05 |                      |           |
|                 | 0.1625199792294693   | .80279866055689e-13  | 2.25261598223634e-11 |                      |           |
|                 | 0.2583024346291941   | .3781192839691e-28   | 1.13596403835738e-26 |                      |           |
| ENSG00000099817 | 19                   | 1086579              | 1095380              | protein_coding       | POLR2E    |
|                 | 8801                 | 0.1528491535929317   | .48334778234998e-16  | 5.84083542591334e-15 |           |
|                 | 0.2253630877105437   | .03828939562224e-30  | 1.49794413243714e-28 |                      |           |
|                 | 0.0881020295766621   | 1.52080171888167e-06 | 1.66597888749611e-05 |                      |           |
|                 | 0.1056921527653831   | .17108300600757e-08  | 7.38635714598863e-07 |                      |           |
|                 | 0.10240406491112     | 3.63151083949842e-08 | 6.3639265881379e-07  |                      |           |
|                 | 0.0695018710933990   | .000135656353484662  | 0.00055469562491799  |                      |           |
| ENSG00000100116 | 22                   | 37807905             | 37817176             | protein_coding       | GCAT 9271 |
|                 | 0.2814939909369045   | .1461255898394e-08   | 1.8020114759296e-07  |                      |           |
|                 | 0.9112063522882619   | .32658998737192e-53  | 1.14408618435643e-50 |                      |           |
|                 | 0.2204941317352191   | .57787320626014e-05  | 0.000130199611654273 |                      |           |
|                 | 0.1938014076625640   | .000152973390725848  | 0.0016444181595384   |                      |           |
|                 | 0.3216232420197917   | .13027529246302e-10  | 1.96606298727932e-08 |                      |           |
|                 | 0.3711792994681591   | .16302996985772e-12  | 1.79572288408458e-11 |                      |           |
| ENSG00000100242 | 22                   | 38734725             | 38794143             | protein_coding       | SUN2      |
|                 | 59418                | 0.2217866885924714   | .95791085458588e-21  | 6.4689525296142e-20  |           |
|                 | 0.2894819356286842   | .67418933838345e-32  | 6.90898767871903e-31 |                      |           |
|                 | 0.1915846356241721   | .18803755164186e-16  | 9.49150616257878e-15 |                      |           |
|                 | 0.0746544529413624   | 0.000823113738055366 | 0.00617394748443166  |                      |           |
|                 | 0.1035495088642554   | .5331672566952e-06   | 4.53578758458925e-05 |                      |           |
|                 | 0.16041644284602     | 2.03597678269433e-12 | 3.04985406707644e-11 |                      |           |
| ENSG00000100292 | 22                   | 35380361             | 35394214             | protein_coding       | HMOX1     |
|                 | 13853                | 0.6644434266754214   | .80457849599441e-24  | 8.64324808188186e-23 |           |
|                 | 0.7353257466296792   | .25789183451853e-28  | 4.31074716788777e-27 |                      |           |
|                 | 0.2334240231812930   | .000149568699392386  | 0.000917374318044872 |                      |           |
|                 | 0.1981950988292690   | .00131251651681252   | 0.00890967094353908  |                      |           |
|                 | 0.2183000845703430   | .000432613727582094  | 0.0023408432963123   |                      |           |
|                 | 0.3091034035869866   | .28938275114732e-07  | 4.19984114359726e-06 |                      |           |
| ENSG00000100325 | 22                   | 29788608             | 29838304             | protein_coding       | ASCC2     |
|                 | 49696                | 0.1153256538800046   | .06956061101518e-15  | 4.28833037455807e-14 |           |
|                 | 0.19871817250306     | 4.07386889845156e-36 | 1.43590053323477e-34 |                      |           |
|                 | 0.0679129031090868   | 2.11849087615972e-06 | 2.24822679561936e-05 |                      |           |
|                 | 0.0482923876368053   | 0.000720195659965786 | 0.0055626813022345   |                      |           |
|                 | 0.0662236121738093   | 4.52863516944884e-06 | 4.53416499388454e-05 |                      |           |
|                 | 0.0691788106282134   | 1.39451539953751e-06 | 8.68311567122096e-06 |                      |           |
| ENSG00000100418 | 22                   | 41598028             | 41621096             | protein_coding       | DESI1     |
|                 | 23068                | 0.0823898144148298   | 1.45711459745828e-07 |                      |           |
|                 | 4.83810492621539e-07 | 0.2542836903098532   | .70254725283501e-46  |                      |           |
|                 | 2.10514918259583e-44 | 0.1016564418041431   | .08198125828984e-10  |                      |           |
|                 | 3.07594635454333e-09 | 0.0796785918446341   | 3.55826211038873e-07 |                      |           |
|                 | 1.17694618721329e-05 | 0.0816191479541866   | 2.14636386527445e-07 |                      |           |
|                 | 3.08387172927688e-06 | 0.1190650731470737   | .15074196129432e-14  |                      |           |
|                 | 1.30141832961453e-12 |                      |                      |                      |           |
| ENSG00000100439 | 14                   | 22598237             | 22613215             | protein_coding       | ABHD4     |
|                 | 14978                | 0.42953086848989     | 4.50500240307694e-37 | 3.21942350630898e-35 |           |
|                 | 0.47821127132763     | 1.15236539712853e-43 | 7.29784574059567e-42 |                      |           |
|                 | 0.1754351138197331   | .04742834263349e-08  | 1.98514430047289e-07 |                      |           |
|                 | 0.1891513101516019   | .26116386997319e-10  | 8.53725869410132e-08 |                      |           |
|                 | 0.2234696830007539   | .84402697433367e-13  | 5.27010639976441e-11 |                      |           |
|                 | 0.3119874149141672   | .04893907977269e-22  | 9.64363200114162e-21 |                      |           |

|                    |                      |                      |                      |                |          |
|--------------------|----------------------|----------------------|----------------------|----------------|----------|
| ENSG00000100591    | 14                   | 77457870             | 77469474             | protein_coding | AHSA1    |
| 11604              | 0.2786117329785019   | .92111581738932e-35  | 5.52003797568244e-33 |                |          |
| 0.1657654316451715 | .93438223608363e-15  | 3.8796366284493e-14  |                      |                |          |
| 0.1317717917495642 | .56122210476795e-10  | 6.71738706568686e-09 |                      |                |          |
| 0.0657620742065586 | 0.00134582155753817  | 0.00906263588249948  |                      |                |          |
| 0.1048398665998184 | .77338687111788e-07  | 6.17646130109181e-06 |                      |                |          |
| 0.1317776614846012 | .59909958373404e-10  | 2.93415742137627e-09 |                      |                |          |
| ENSG00000101049    | 20                   | 43558968             | 43588237             | protein_coding | SGK2     |
| 29269              | 0.6535021458431516   | .26036831095759e-26  | 1.37949473714863e-24 |                |          |
| 1.43222596373988   | 3.67746269641587e-81 | 3.81941275649753e-78 |                      |                |          |
| 0.6113579995962421 | .90605209033264e-23  | 3.95925140203896e-21 |                      |                |          |
| 0.4386043341391071 | .9202182618605e-13   | 4.90411152484011e-11 |                      |                |          |
| 0.5946022233367864 | .53936274751709e-22  | 1.12251955942173e-19 |                      |                |          |
| 1.21802682975977   | 3.06638672499783e-66 | 2.38856193943706e-63 |                      |                |          |
| ENSG00000101084    | 20                   | 36605734             | 36612557             | protein_coding | C20orf24 |
| 6823               | 0.3677013697883352   | .35086486188306e-15  | 1.7423465120493e-14  |                |          |
| 0.4871232727236771 | .88313093030179e-24  | 2.67188495110852e-23 |                      |                |          |
| 0.1964643092412531 | .1877302411778e-05   | 0.000101780249875187 |                      |                |          |
| 0.1925138465911111 | .91595222423637e-05  | 0.000303648216697643 |                      |                |          |
| 0.1667419021328060 | .000217150138310575  | 0.00129665849165981  |                      |                |          |
| 0.1630447293589270 | .000265889136260416  | 0.00101377553935414  |                      |                |          |
| ENSG00000103197    | 16                   | 2047465              | 2088720              | protein_coding | TSC2     |
| 41255              | 0.0584554028811590   | .000514865096246605  | 0.00108569075993853  |                |          |
| 0.1240899590867557 | .26095190552164e-13  | 3.9524238202698e-12  |                      |                |          |
| 0.0662184690592742 | 8.03047167408453e-05 | 0.000537169249508642 |                      |                |          |
| 0.0826513844077531 | .10825771151192e-06  | 2.93631749789867e-05 |                      |                |          |
| 0.10648987441123   | 6.26664506512967e-10 | 1.74335827624384e-08 |                      |                |          |
| 0.0672037896278335 | 6.33559252680597e-05 | 0.000281122745585617 |                      |                |          |
| ENSG00000103423    | 16                   | 4425805              | 4456775              | protein_coding | DNAJA3   |
| 30970              | 0.2543565270259011   | .08839737571791e-37  | 8.65109322260683e-36 |                |          |
| 0.3134673734381991 | .90452702420489e-51  | 2.046250104144e-49   |                      |                |          |
| 0.1474549520946319 | .47927847466204e-16  | 6.50562464126696e-14 |                      |                |          |
| 0.0852652971740673 | 1.92897537350261e-06 | 4.5810224609447e-05  |                      |                |          |
| 0.1725639136916014 | .18389038765723e-20  | 8.25073776573569e-18 |                      |                |          |
| 0.0578826265667498 | 0.00106344623083022  | 0.00351228086285859  |                      |                |          |
| ENSG00000104131    | 15                   | 44537057             | 44563029             | protein_coding | EIF3J    |
| 25972              | 0.2860263068405891   | .23314561904276e-32  | 5.42688576244836e-31 |                |          |
| 0.3267086546927634 | .03060015890009e-40  | 1.90859330928585e-38 |                      |                |          |
| 0.1192605293389626 | .75976737341747e-08  | 1.04371076224451e-06 |                      |                |          |
| 0.12556532585533   | 1.6456138798376e-08  | 9.82261250344446e-07 |                      |                |          |
| 0.1187269790063099 | .99062342636733e-08  | 1.56583422896757e-06 |                      |                |          |
| 0.1693832760812575 | .57187734053816e-14  | 1.02848669535834e-12 |                      |                |          |
| ENSG00000104419    | 8                    | 133237171            | 133302022            | protein_coding | NDRG1    |
| 64851              | 0.9000629750912342   | .66904550524181e-31  | 1.04475024940106e-29 |                |          |
| 0.1988348283112720 | .00482751901308241   | 0.00880757919016405  |                      |                |          |
| 0.4249436504560872 | .91197118702949e-09  | 6.21446563325102e-08 |                      |                |          |
| 0.2243907987853260 | .00149421795136491   | 0.00981797615534119  |                      |                |          |
| 0.2741235837031660 | .000119601604778923  | 0.000780919279484843 |                      |                |          |
| 0.2725706166398410 | .00011919188840461   | 0.000467085261022104 |                      |                |          |
| ENSG00000104687    | 8                    | 30678061             | 30727926             | protein_coding | GSR      |
| 49865              | 0.29991342717856     | 1.59750075730028e-37 | 1.20819093357468e-35 |                |          |
| 0.3464882334841161 | .28736083419649e-46  | 1.01806063126635e-44 |                      |                |          |
| 0.1301628581989639 | .72552167514826e-10  | 2.28912706874694e-08 |                      |                |          |
| 0.0723260956528442 | 0.000577702358861251 | 0.0046704852354434   |                      |                |          |



|                 |                    |                      |                      |                        |
|-----------------|--------------------|----------------------|----------------------|------------------------|
|                 | 0.18461329517965   | 4.81046070702365e-17 | 5.94779105989852e-15 |                        |
|                 | 0.1089438601908232 | .52225630184982e-07  | 1.79836297146537e-06 |                        |
| ENSG00000104953 | 19                 | 2977446              | 2995184              | protein_coding TLE6    |
|                 | 17738              | 1.03289888409969     | 1.80622264235978e-16 | 1.49121052174472e-15   |
|                 | 1.81911262916619   | 4.20609082515025e-41 | 2.1413950642162e-39  |                        |
|                 | 0.45937895144699   | 0.000141179475954865 | 0.000873138172251228 |                        |
|                 | 0.7562251655849897 | 7.79236745261097e-10 | 7.40227393562355e-08 |                        |
|                 | 0.7284087155871493 | 4.4182416241325e-09  | 7.9202627217483e-08  |                        |
|                 | 1.38550561179542   | 6.59271666505318e-27 | 4.66854240567561e-25 |                        |
| ENSG00000105220 | 19                 | 34359480             | 34402156             | protein_coding GPI     |
|                 | 42676              | 0.1843154296412383   | .8209020302269e-12   | 2.0784159472383e-11    |
|                 | 0.2347370719001424 | .30339344831853e-18  | 3.60056748288692e-17 |                        |
|                 | 0.0811540200685563 | 0.0015999704891335   | 0.00681968269499613  |                        |
|                 | 0.1179112138681445 | .91248562743909e-06  | 0.000117638076104564 |                        |
|                 | 0.0975758222976868 | 0.000179684232050455 | 0.00110078672871177  |                        |
|                 | 0.1295154099402796 | .1461521596247e-07   | 4.10771791054454e-06 |                        |
| ENSG00000105398 | 19                 | 47870466             | 47886397             | protein_coding SULT2A1 |
|                 | 15931              | 0.4880253972503431   | .59255420494192e-09  | 6.60729745906529e-09   |
|                 | 0.8215969289658552 | .22618680170243e-22  | 2.63940366694994e-21 |                        |
|                 | 0.67310287607423   | 2.81644686031041e-16 | 2.15085419788117e-14 |                        |
|                 | 0.3060134142987    | 0.000121297139561348 | 0.00136834767358887  |                        |
|                 | 0.3298597150655243 | .87177517688338e-05  | 0.000293806066637438 |                        |
|                 | 0.9910310760954651 | .51949795229743e-30  | 1.42603967462901e-28 |                        |
| ENSG00000105699 | 19                 | 35248330             | 35267964             | protein_coding LSR     |
|                 | 19634              | 0.1817407077892991   | .56750838751793e-11  | 7.95187664250792e-11   |
|                 | 0.3680319532847142 | .52488483951162e-36  | 9.02183048503476e-35 |                        |
|                 | 0.2077850156280491 | .69703616333213e-14  | 9.61386414129134e-13 |                        |
|                 | 0.1713426025170961 | .80023497377625e-10  | 2.1087113275534e-08  |                        |
|                 | 0.1552194708315147 | .55060965970686e-09  | 1.59175842880343e-07 |                        |
|                 | 0.2919488208597372 | .31526198265717e-25  | 1.46623847267545e-23 |                        |
| ENSG00000106258 | 7                  | 99648194             | 99679998             | protein_coding CYP3A5  |
|                 | 31804              | 0.4561630086121322   | .6297404173911e-13   | 1.60598690562665e-12   |
|                 | 1.41151319378472   | 1.35808274537606e-74 | 9.19894395226677e-72 |                        |
|                 | 0.7552581674103231 | .52607833927338e-30  | 5.94369361188498e-28 |                        |
|                 | 0.6091320246504671 | .9898388130182e-21   | 1.63156309831634e-18 |                        |
|                 | 0.8696825349815041 | .87005558339023e-37  | 1.82084974585228e-34 |                        |
|                 | 0.9483540947577222 | .16654653188767e-43  | 5.03770573436985e-41 |                        |
| ENSG00000106305 | 7                  | 6009245              | 6023834              | protein_coding AIMP2   |
|                 | 14589              | 0.3148179935458496   | .00797057344206e-16  | 4.72718048301282e-15   |
|                 | 0.5755910478014694 | .45386583636566e-42  | 2.48698121378999e-40 |                        |
|                 | 0.2212454227784635 | .33946453830931e-09  | 1.08311872450939e-07 |                        |
|                 | 0.1705333438716946 | .19949589688158e-06  | 0.000122565922052688 |                        |
|                 | 0.2255597119649993 | .74575686722329e-09  | 8.53145412784674e-08 |                        |
|                 | 0.1849007140032779 | .26469937876848e-07  | 5.97164880520621e-06 |                        |
| ENSG00000106853 | 9                  | 111549722            | 111599855            | protein_coding PTGR1   |
|                 | 50133              | 0.5307251511413561   | .41802899020811e-34  | 7.75139425910603e-33   |
|                 | 0.6620776239135023 | .3083468601615e-48   | 2.89554695137393e-46 |                        |
|                 | 0.1627574562401583 | .18463875102426e-05  | 0.000242370006357992 |                        |
|                 | 0.1551769154063037 | .75614332521643e-05  | 0.000950692028824129 |                        |
|                 | 0.2936702875098324 | .23383264194326e-13  | 2.47003872795503e-11 |                        |
|                 | 0.2801505277117192 | .48591427648614e-12  | 3.69895496784887e-11 |                        |
| ENSG00000108671 | 17                 | 32444261             | 32483318             | protein_coding PSMD11  |
|                 | 39057              | 0.3143298968046761   | .60230006694105e-52  | 8.05233314286279e-50   |
|                 | 0.2784169076292735 | .35591489531205e-44  | 3.47665825641943e-42 |                        |

|                 |                    |                      |                      |                      |            |
|-----------------|--------------------|----------------------|----------------------|----------------------|------------|
|                 | 0.0869622346874177 | 8.1625827588656e-07  | 9.60459794564707e-06 |                      |            |
|                 | 0.0591728699503919 | 0.000752065440261808 | 0.00573772159345676  |                      |            |
|                 | 0.1008070082720231 | .77012878296915e-08  | 3.37406432117729e-07 |                      |            |
|                 | 0.2047813393460481 | .65933431324122e-27  | 1.25489171194102e-25 |                      |            |
| ENSG00000109084 | 17                 | 28319095             | 28328685             | protein_coding       | TMEM97     |
|                 | 9590               | 0.1790789702606230   | .00504242280024323   | 0.00908160749190628  |            |
|                 | 0.8987569947063111 | .34245721332744e-36  | 4.89792527551011e-35 |                      |            |
|                 | 1.10644585206117   | 2.66820078149638e-50 | 8.31357999498642e-47 |                      |            |
|                 | 0.33700580805025   | 1.90055414905858e-07 | 7.11748391542876e-06 |                      |            |
|                 | 0.3592293384168883 | .51954004902578e-08  | 6.18859079275086e-07 |                      |            |
|                 | 0.7319092498192351 | .169558679793e-26    | 8.1341761930782e-25  |                      |            |
| ENSG00000109814 | 4                  | 39498755             | 39528311             | protein_coding       | UGDH       |
|                 | 29556              | 0.63482373058091     | 1.960824799607e-46   | 4.69964454662729e-44 |            |
|                 | 0.7539565179901972 | .89808476317575e-59  | 5.78836699045064e-57 |                      |            |
|                 | 0.2829528810331247 | .47218747875204e-13  | 3.21572399810713e-11 |                      |            |
|                 | 0.2874201901032164 | .38402164064404e-13  | 1.03482838090293e-10 |                      |            |
|                 | 0.4829261674805532 | .63247840055676e-30  | 1.64045524009095e-27 |                      |            |
|                 | 0.6208524887746522 | .70645730546705e-45  | 6.85003015604018e-43 |                      |            |
| ENSG00000110244 | 11                 | 116820700            | 116823306            | protein_coding       | APOA4 2606 |
|                 | 0.3822964437692466 | .10335491424154e-07  | 1.88397396887198e-06 |                      |            |
|                 | 0.3360634708363    | 1.06677780521272e-05 | 2.80069622976222e-05 |                      |            |
|                 | 0.3477729113347844 | .8404854848249e-06   | 4.63775666470401e-05 |                      |            |
|                 | 0.31360103936026   | 3.88611941816709e-05 | 0.000538149817027778 |                      |            |
|                 | 0.2373973561326790 | .00183803245286874   | 0.00798513875717851  |                      |            |
|                 | 0.2739741797531680 | .000295676398724743  | 0.00111804432420698  |                      |            |
| ENSG00000110958 | 12                 | 56663341             | 56688408             | protein_coding       | PTGES3     |
|                 | 25067              | 0.2953972083625835   | .05108484927402e-48  | 1.43074274303345e-45 |            |
|                 | 0.1702067505852873 | .31913305504056e-20  | 3.30196512544552e-19 |                      |            |
|                 | 0.1364063484575393 | .96516312118813e-14  | 2.08693500895236e-12 |                      |            |
|                 | 0.0768593264028938 | 1.32583550922896e-05 | 0.000225739796702491 |                      |            |
|                 | 0.0715404332155742 | 5.30124361119588e-05 | 0.000386286595972032 |                      |            |
|                 | 0.13362652926143   | 1.17078670999515e-13 | 2.07269160852438e-12 |                      |            |
| ENSG00000111726 | 12                 | 22046174             | 22065674             | protein_coding       | CMAS       |
|                 | 19500              | 0.28480440405634     | 8.24725904018217e-27 | 2.03180296603326e-25 |            |
|                 | 0.3672514022163875 | .3538939219761e-40   | 2.50475415647044e-38 |                      |            |
|                 | 0.1246105191310875 | .19955500142715e-07  | 6.38831761571243e-06 |                      |            |
|                 | 0.1055946053626662 | .10297982799205e-05  | 0.000326969288825232 |                      |            |
|                 | 0.1419613295958631 | .70515903560284e-08  | 3.26347329430671e-07 |                      |            |
|                 | 0.2867926241235522 | .689212093809e-27    | 1.95772127146964e-25 |                      |            |
| ENSG00000112208 | 6                  | 57172326             | 57189833             | protein_coding       | BAG2       |
|                 | 17507              | 0.4652224861018081   | .40192214317467e-39  | 1.43687796503409e-37 |            |
|                 | 0.5314683339895522 | .39882100493461e-48  | 2.12336547931115e-46 |                      |            |
|                 | 0.1805289884486921 | .40399877949928e-08  | 2.58239633834939e-07 |                      |            |
|                 | 0.1436234998296385 | .9519171483906e-06   | 0.000118271578131093 |                      |            |
|                 | 0.20340179859177   | 2.93908643483953e-10 | 8.7049482069135e-09  |                      |            |
|                 | 0.27574216792248   | 3.4961529403819e-17  | 9.23162146749316e-16 |                      |            |
| ENSG00000113013 | 5                  | 138554882            | 138575444            | protein_coding       | HSPA9      |
|                 | 20562              | 0.1845179911107473   | .79358858445248e-21  | 5.02126733705906e-20 |            |
|                 | 0.4057837171332233 | .22426251118499e-69  | 1.35836362300422e-66 |                      |            |
|                 | 0.0625288040625627 | 0.000687265217245673 | 0.00336272136289897  |                      |            |
|                 | 0.1278017303889511 | .5550585908846e-11   | 2.47206712116237e-09 |                      |            |
|                 | 0.2029407925405811 | .71384416364798e-24  | 5.9333284945493e-22  |                      |            |
|                 | 0.0981840364504905 | 1.34428392678159e-07 | 1.01269822511269e-06 |                      |            |



|                      |                      |                      |                      |                |            |
|----------------------|----------------------|----------------------|----------------------|----------------|------------|
| ENSG00000114480      | 3                    | 81489699             | 81762161             | protein_coding | GBE1       |
| 272462               | 0.3337056212291397   | 4.8554263079369e-22  |                      |                |            |
| 1.06499788717018e-20 | 0.21573796227937     | 1.21125437457263e-10 |                      |                |            |
| 5.31104190865946e-10 | 0.2592388219220221   | 5.9094670954827e-14  |                      |                |            |
| 9.11226426031342e-13 | 0.1192565350142920   | 0.000281324321870126 |                      |                |            |
| 0.00267078099354948  | 0.1772038239130661   | 0.0788304798984e-07  |                      |                |            |
| 1.67234826331714e-06 | 0.3100215419614031   | 5.5999577035888e-19  |                      |                |            |
| 5.30636989223165e-18 |                      |                      |                      |                |            |
| ENSG00000114686      | 3                    | 131462212            | 131502983            | protein_coding | MRPL3      |
| 40771                | 0.3023788438128214   | 8.1460303914818e-41  | 5.76974621129919e-39 |                |            |
| 0.2551185795655221   | 4.0686253941765e-31  | 3.4086332039794e-30  |                      |                |            |
| 0.0831045890367408   | 3.18140566198775e-05 | 0.000242243982444316 |                      |                |            |
| 0.1091187772733616   | 9.2281728091948e-08  | 3.06393665964331e-06 |                      |                |            |
| 0.11936436596288     | 4.84915387551197e-09 | 1.07155983300143e-07 |                      |                |            |
| 0.0768949276157338   | 0.000116535633235382 | 0.000484393978168094 |                      |                |            |
| ENSG00000115053      | 2                    | 231453531            | 231483641            | protein_coding | NCL        |
| 30110                | 0.2863035552426933   | 6.2129356763279e-40  | 4.00114414823768e-38 |                |            |
| 0.1953668723789126   | 7.4083669719408e-22  | 7.72740948532646e-21 |                      |                |            |
| 0.0860777664924068   | 7.33280514877146e-06 | 6.66498082921299e-05 |                      |                |            |
| 0.0765948192257699   | 6.81509995806854e-05 | 0.00085969588863765  |                      |                |            |
| 0.1135087960615456   | 6.65634049496062e-09 | 1.42248461688603e-07 |                      |                |            |
| 0.1394547959244841   | 1.13078180021082e-12 | 1.75462646070561e-11 |                      |                |            |
| ENSG00000115484      | 2                    | 61868089             | 61888804             | protein_coding | CCT4       |
| 20715                | 0.2244562528483831   | 1.59189971222059e-35 | 1.00813843970262e-33 |                |            |
| 0.1701248839017758   | 0.08348469245246e-23 | 9.93943236177718e-22 |                      |                |            |
| 0.0495856408880782   | 0.00219540002072362  | 0.00890912657537206  |                      |                |            |
| 0.0609846182746940   | 0.000186343514941165 | 0.0019289339662913   |                      |                |            |
| 0.1045093933150193   | 8.0639337242017e-10  | 1.10840752054082e-08 |                      |                |            |
| 0.0725403360835859   | 8.66018722026952e-06 | 4.59840002401428e-05 |                      |                |            |
| ENSG00000115541      | 2                    | 197499994            | 197503457            | protein_coding | HSPE1 3463 |
| 0.2045924761935755   | 5.6733583598799e-11  | 2.68441736270061e-10 |                      |                |            |
| 0.2785635856809492   | 5.357461308476e-18   | 2.15753080133668e-17 |                      |                |            |
| 0.1073452082137720   | 0.000419321017320115 | 0.00220952397531619  |                      |                |            |
| 0.1394111946701675   | 7.4560242359501e-06  | 0.00011549772923508  |                      |                |            |
| 0.1657496127687739   | 9.25685031031158e-08 | 1.46408599984106e-06 |                      |                |            |
| 0.1594532904076812   | 1.16169240826688e-07 | 1.5685610632692e-06  |                      |                |            |
| ENSG00000115866      | 2                    | 135906677            | 135986100            | protein_coding | DARS       |
| 79423                | 0.1964656380943891   | 4.1069429293895e-18  | 1.44491823732386e-17 |                |            |
| 0.1623375336031511   | 1.47511998184294e-13 | 8.53673632880056e-13 |                      |                |            |
| 0.0753862823845370   | 0.000387639368427439 | 0.00207170968121134  |                      |                |            |
| 0.1154182971942328   | 8.9125812725506e-08  | 3.84769195456963e-06 |                      |                |            |
| 0.1199111572772273   | 3.2704087727499e-08  | 5.87664056996225e-07 |                      |                |            |
| 0.1403832101582769   | 6.1417785946697e-11  | 1.14773392239568e-09 |                      |                |            |
| ENSG00000116120      | 2                    | 222570536            | 222656337            | protein_coding | FARSB      |
| 85801                | 0.3623174321582357   | 6.8408280015442e-31  | 2.84347567562009e-29 |                |            |
| 0.3223421789411081   | 3.33351759905789e-25 | 2.05691788868543e-24 |                      |                |            |
| 0.0934250228115276   | 0.00111335576957114  | 0.00505562618453061  |                      |                |            |
| 0.0971079596638127   | 0.000747914838844173 | 0.00570885118782624  |                      |                |            |
| 0.1995693924709091   | 5.909814400447e-11   | 6.30684474668103e-10 |                      |                |            |
| 0.1115060070291750   | 0.000105810725916912 | 0.00044419975722435  |                      |                |            |
| ENSG00000117155      | 1                    | 84643707             | 84690803             | protein_coding | SSX2IP     |
| 47096                | 0.1681513764704332   | 6.7902716335425e-08  | 9.75153368642428e-08 |                |            |
| 0.5134548148522738   | 1.9426069775922e-50  | 8.02882939687993e-48 |                      |                |            |
| 0.1841772446884431   | 1.09626312753365e-09 | 2.55668911135429e-08 |                      |                |            |

|                 |                      |                      |                      |                       |
|-----------------|----------------------|----------------------|----------------------|-----------------------|
|                 | 0.13884132130362     | 3.7939414705157e-06  | 8.07456477720821e-05 |                       |
|                 | 0.2434227146101824   | .21823004280314e-15  | 3.73385260436535e-13 |                       |
|                 | 0.2080638767631518   | .24956679446282e-12  | 1.1475000097405e-10  |                       |
| ENSG00000117450 | 1                    | 45511036             | 45523047             | protein_coding PRDX1  |
|                 | 12011                | 0.1990766511252481   | .37274943495591e-21  | 1.89424831241613e-20  |
|                 | 0.24778123759079     | 1.05113003370888e-30 | 2.38016784813236e-29 |                       |
|                 | 0.0826395522996412   | .7468253611955e-05   | 0.000212793596728318 |                       |
|                 | 0.0762175366513667   | 0.000115024473518802 | 0.00130896002406823  |                       |
|                 | 0.1663753900614986   | .34420713910854e-16  | 6.63331563893771e-14 |                       |
|                 | 0.3203531550644766   | .11006769323841e-46  | 1.69979901058859e-43 |                       |
| ENSG00000119929 | 10                   | 99702558             | 99756134             | protein_coding CUTC   |
|                 | 53576                | 0.5158903297002461   | .24479941361449e-37  | 9.79430811348493e-36  |
|                 | 0.8550187816468447   | .40799661218219e-77  | 5.77045896105932e-74 |                       |
|                 | 0.2620341049673321   | .2982088300748e-12   | 5.37893493716365e-11 |                       |
|                 | 0.2338611223737732   | .20753432264992e-10  | 2.52876303033552e-08 |                       |
|                 | 0.2735193425047722   | .43483834973616e-13  | 1.54196531099755e-11 |                       |
|                 | 0.3334459687268778   | .95985977010814e-19  | 2.79730772261552e-17 |                       |
| ENSG00000120438 | 6                    | 159778498            | 159789749            | protein_coding TCP1   |
|                 | 11251                | 0.1597581558945433   | .52152044539355e-23  | 5.75070933110966e-22  |
|                 | 0.1089634173495232   | .49402212873067e-12  | 1.29342112994324e-11 |                       |
|                 | 0.0629726191318589   | 3.20143435196621e-05 | 0.000243174103499498 |                       |
|                 | 0.0581582474266247   | 0.000128376227914595 | 0.00142855232477248  |                       |
|                 | 0.0565926967309816   | 0.000206790820589561 | 0.00124098389598027  |                       |
|                 | 0.0965503171917973   | .39809059408669e-10  | 3.78134666894832e-09 |                       |
| ENSG00000121060 | 17                   | 56887909             | 56914038             | protein_coding TRIM25 |
|                 | 26129                | 0.2999985120010431   | .16773987997966e-21  | 1.61852487457324e-20  |
|                 | 0.5894772456104769   | .26429301168348e-61  | 2.0917162438988e-58  |                       |
|                 | 0.1051277729155540   | .000372977738654683  | 0.00200258268871957  |                       |
|                 | 0.2099789335769795   | .07323007794083e-12  | 9.19021527723724e-10 |                       |
|                 | 0.2824811553205591   | .81898162344214e-19  | 3.30182298365282e-17 |                       |
|                 | 0.3508379051203853   | .87860016505583e-28  | 3.05175312986893e-26 |                       |
| ENSG00000122787 | 7                    | 138002324            | 138117986            | protein_coding AKR1D1 |
|                 | 115662               | 0.85380087317783     | 2.94877863175081e-17 |                       |
|                 | 2.62508698880262e-16 | 2.34986097740146     | 3.45461170320131e-79 |                       |
|                 | 3.16584680730431e-76 | 0.5245439737664178   | 1.7953075988746e-08  |                       |
|                 | 1.23477625686324e-06 | 0.8026898150980451   | 1.40380137566239e-15 |                       |
|                 | 4.85996036254321e-13 | 0.8366443940479      | 1.46355952594213e-16 |                       |
|                 | 1.68894769293722e-14 | 2.0695465353293      | 1.20770407476823e-67 |                       |
|                 | 1.0452678767119e-64  |                      |                      |                       |
| ENSG00000124588 | 6                    | 2987987              | 3028869              | protein_coding NQO2   |
|                 | 40882                | 0.4884457697306951   | .12403005017745e-35  | 7.2062815439154e-34   |
|                 | 0.7366784539833787   | .63338585977909e-65  | 2.16219124199088e-62 |                       |
|                 | 0.1842536027553962   | .24201226026455e-07  | 3.01106112091909e-06 |                       |
|                 | 0.2009507306386542   | .10540800796701e-08  | 1.16726517281559e-06 |                       |
|                 | 0.2282891172587682   | .98184756985627e-10  | 8.79814456264979e-09 |                       |
|                 | 0.4185424047698823   | .72200664142757e-28  | 2.95842558504082e-26 |                       |
| ENSG00000124615 | 6                    | 39899578             | 39934551             | protein_coding MOCS1  |
|                 | 34973                | 0.1046062913925880   | .000276657135978249  | 0.00060838141710922   |
|                 | 0.5022023194926426   | .23385645401591e-51  | 6.56197633088608e-49 |                       |
|                 | 0.1488737331630362   | .56377751868138e-07  | 3.38770907239502e-06 |                       |
|                 | 0.18462331591607     | 2.90501553936245e-10 | 3.10767618024227e-08 |                       |
|                 | 0.1913092335361148   | .44040023916915e-11  | 2.78586854504271e-09 |                       |
|                 | 0.3035248132276131   | .91326058134991e-23  | 1.02781677920173e-21 |                       |

|                    |                      |                      |                      |                |         |
|--------------------|----------------------|----------------------|----------------------|----------------|---------|
| ENSG00000125630    | 2                    | 112541915            | 112577150            | protein_coding | POLR1B  |
| 35235              | 0.2450528589698931   | 38543915206444e-19   | 1.58238684384251e-18 |                |         |
| 0.3420381636474911 | 2.9755227578143e-33  | 3.79260167061892e-32 |                      |                |         |
| 0.1380864148101311 | 0.03892815722089e-07 | 1.52681824283005e-06 |                      |                |         |
| 0.1138183716833141 | 1.12619457330831e-05 | 0.0001989227353466   |                      |                |         |
| 0.1461934784852812 | 5.2589921818589e-08  | 4.62952752001388e-07 |                      |                |         |
| 0.1569316138342161 | 1.87098384571368e-09 | 1.86966371599573e-08 |                      |                |         |
| ENSG00000125912    | 19                   | 3185563              | 3209575              | protein_coding | NCLN    |
| 24012              | 0.56343797978211     | 1.7834716543722e-53  | 1.09196083323189e-50 |                |         |
| 0.4514788177321761 | 4.6151171618602e-38  | 6.2210084771754e-37  |                      |                |         |
| 0.2162991972345469 | 1.4489983255964e-12  | 3.23791805662379e-10 |                      |                |         |
| 0.2040227988055841 | 3.1382100447804e-10  | 1.61165491565066e-08 |                      |                |         |
| 0.1789264457579871 | 6.4105997215962e-08  | 3.15084427940602e-07 |                      |                |         |
| 0.1885070970559912 | 1.7204436034306e-09  | 2.14437763560105e-08 |                      |                |         |
| ENSG00000126067    | 1                    | 35599544             | 35641844             | protein_coding | PSMB2   |
| 42300              | 0.1764103043767075   | 7.1555046410344e-25  | 1.14303672246813e-23 |                |         |
| 0.2443763699259471 | 2.0760028387186e-41  | 6.57804364420967e-40 |                      |                |         |
| 0.0624227332444054 | 9.10945610401924e-05 | 0.000598802601875594 |                      |                |         |
| 0.0518278841653341 | 0.00117688518840569  | 0.0081623582615269   |                      |                |         |
| 0.0783916172817705 | 1.29916381881182e-06 | 1.50369042594869e-05 |                      |                |         |
| 0.0973915312476015 | 1.76807641206941e-09 | 1.77823514678046e-08 |                      |                |         |
| ENSG00000126953    | X                    | 101345661            | 101349196            | protein_coding | TIMM8A  |
| 3535               | 0.2820932059622784   | 3.3297968935958e-12  | 2.3455000201714e-11  |                |         |
| 0.44982834755085   | 3.84272001259862e-26 | 6.14637937128068e-25 |                      |                |         |
| 0.1649157187849333 | 2.8460949085053e-05  | 0.000248282053653374 |                      |                |         |
| 0.1476729849616    | 0.000207463904275868 | 0.00208521300949274  |                      |                |         |
| 0.2699122782952013 | 6.4790242266265e-11  | 1.33719227865086e-09 |                      |                |         |
| 0.1414313679157870 | 0.00035956257372886  | 0.00132865876093973  |                      |                |         |
| ENSG00000127220    | 19                   | 17292131             | 17310236             | protein_coding | ABHD8   |
| 18105              | 0.2701809598898142   | 3.6698070517379e-09  | 9.62547439464955e-09 |                |         |
| 0.7385284928667932 | 5.0997475033826e-47  | 2.10049346633866e-45 |                      |                |         |
| 0.2535772947584881 | 6.5850696379954e-08  | 3.00790221059755e-07 |                      |                |         |
| 0.2313534464954812 | 6.8221741719706e-07  | 9.47534356973084e-06 |                      |                |         |
| 0.1779732218712267 | 2.2533671061262e-05  | 0.000503639913264582 |                      |                |         |
| 0.2348592765572871 | 6.1607346145814e-07  | 1.19946681543861e-06 |                      |                |         |
| ENSG00000127948    | 7                    | 75899200             | 75986855             | protein_coding | POR     |
| 87655              | 0.5951757874145617   | 3.1948595003377e-38  | 5.93907664664459e-36 |                |         |
| 1.14983654653915   | 1.72531835035559e-92 | 3.35984182252371e-89 |                      |                |         |
| 0.7671542258683512 | 2.0047658944417e-55  | 1.18096013760054e-51 |                      |                |         |
| 0.6064429692715185 | 8.5504836878522e-39  | 2.28039496343262e-35 |                      |                |         |
| 0.7272095233706861 | 3.4584844722639e-50  | 4.19339459186798e-47 |                      |                |         |
| 0.6726243437746157 | 1.3361432795191e-46  | 1.94972943184496e-43 |                      |                |         |
| ENSG00000128242    | 22                   | 30554635             | 30574587             | protein_coding | GAL3ST1 |
| 19952              | 0.5871985472301438   | 7.9738662346076e-16  | 6.80508868951813e-15 |                |         |
| 1.10894013891448   | 6.00324949566966e-44 | 3.86465387987759e-42 |                      |                |         |
| 0.2394425490873150 | 0.000649305146235255 | 0.00319909072523689  |                      |                |         |
| 0.3494722057064718 | 8.5478768650247e-07  | 2.4546038677584e-05  |                      |                |         |
| 0.4222603864570254 | 1.6748242103401e-09  | 9.38225558342324e-08 |                      |                |         |
| 0.8322118737925183 | 5.3331934817018e-28  | 2.8374011404713e-26  |                      |                |         |
| ENSG00000128989    | 15                   | 52547045             | 52569883             | protein_coding | ARPP19  |
| 22838              | 0.2251000214545473   | 8.9350271243666e-23  | 6.31842487052612e-22 |                |         |
| 0.4616740009706866 | 4.1737933032851e-68  | 2.325031455516e-65   |                      |                |         |
| 0.1375962083379932 | 2.9399853263349e-10  | 6.09866947779814e-09 |                      |                |         |
| 0.1170022505154066 | 4.0452643545098e-08  | 2.87539243048677e-06 |                      |                |         |

|                 |                      |                      |                      |                          |
|-----------------|----------------------|----------------------|----------------------|--------------------------|
|                 | 0.1860485100530338   | .98355803501412e-17  | 1.06026401990519e-14 |                          |
|                 | 0.4667941781288832   | .02127917048593e-69  | 2.09930054646668e-66 |                          |
| ENSG00000130348 | 6                    | 106629578            | 106668417            | protein_coding QRSL1     |
|                 | 38839                | 0.1434087434979694   | .35231254644418e-13  | 2.60235852886066e-12     |
|                 | 0.29996501553476     | 4.9546102779084e-43  | 2.98022677681602e-41 |                          |
|                 | 0.11073451443539     | 1.2111669889102e-08  | 2.26515852583817e-07 |                          |
|                 | 0.0822988875836437   | 2.07250765188216e-05 | 0.000323199166252974 |                          |
|                 | 0.1132910764229287   | .72062777498276e-09  | 1.62320728888605e-07 |                          |
|                 | 0.1255941043560341   | .37664206925864e-10  | 1.59930699455484e-09 |                          |
| ENSG00000130402 | 19                   | 38647649             | 38731583             | protein_coding ACTN4     |
|                 | 83934                | 0.1011718632814446   | .2093261722018e-10   | 2.69232096957227e-09     |
|                 | 0.0776493963084821   | 1.62284096635432e-06 | 4.68536683002852e-06 |                          |
|                 | 0.0597404313057357   | 0.000189408088861833 | 0.00112751516403773  |                          |
|                 | 0.0635224309362705   | 7.95966781108706e-05 | 0.000970294716971247 |                          |
|                 | 0.0891408816104775   | 4.92463649087913e-08 | 8.29415263690875e-07 |                          |
|                 | 0.0727690062778615   | .93549961537153e-06  | 3.24795042177285e-05 |                          |
| ENSG00000130764 | 1                    | 3778558              | 3796504              | protein_coding LRRC47    |
|                 | 17946                | 0.1586551262064887   | .14832846506033e-20  | 8.43280483778178e-19     |
|                 | 0.20587137595654     | 2.33354500397756e-30 | 5.13478779900656e-29 |                          |
|                 | 0.1306920429185251   | .55794684094508e-14  | 8.95618222696807e-13 |                          |
|                 | 0.0709025849782687   | 1.97688911963521e-05 | 0.000311405011069737 |                          |
|                 | 0.0549437466750602   | 0.000937861894227568 | 0.00451512683874267  |                          |
|                 | 0.0536297539127215   | 0.00112380113703045  | 0.00369049281488141  |                          |
| ENSG00000131653 | 16                   | 2155698              | 2178129              | protein_coding TRAF7     |
|                 | 22431                | 0.2881243769416467   | .62041114908278e-42  | 9.89319877429671e-40     |
|                 | 0.49273989594767     | 7.57395107208168e-87 | 1.07267803410873e-83 |                          |
|                 | 0.15111174012673     | 5.93102535418199e-15 | 3.63777338554335e-13 |                          |
|                 | 0.1573193728896397   | .36937017312014e-16  | 2.80018092504972e-13 |                          |
|                 | 0.2022008827159348   | .85052935763676e-24  | 2.55337771967821e-21 |                          |
|                 | 0.3384717911749832   | .35408196774722e-53  | 9.65111657250891e-51 |                          |
| ENSG00000132002 | 19                   | 14514770             | 14529770             | protein_coding DNAJB1    |
|                 | 15000                | 0.2436608481346148   | .00457897120844e-20  | 9.36914619026719e-19     |
|                 | 0.18471935748598     | 1.51549309021764e-12 | 8.0196558602244e-12  |                          |
|                 | 0.0905476626433250   | .000351702142658693  | 0.00190845269260877  |                          |
|                 | 0.0978443185350661   | 0.000123731783509174 | 0.00138378855368947  |                          |
|                 | 0.1893298964350755   | .8279038034823e-13   | 3.27772250377078e-11 |                          |
|                 | 0.1794365853873634   | .82047826375887e-12  | 6.91512254798338e-11 |                          |
| ENSG00000132286 | 11                   | 6481447              | 6484679              | protein_coding TIMM10B   |
|                 | 3232                 | 0.0767893189680304   | 8.11223885672431e-05 |                          |
|                 | 0.000191427702437001 | 0.1560039147318627   | .79006247815652e-15  |                          |
|                 | 5.03156647376453e-14 | 0.18436310560005     | 1.11958037790713e-19 |                          |
|                 | 1.40660828285606e-17 | 0.0921600167186476   | 2.48650474542528e-06 |                          |
|                 | 5.67163359135878e-05 | 0.10483551755081     | 1.08522417230875e-07 |                          |
|                 | 1.68026625867305e-06 | 0.0781636661091358   | 5.68960661730118e-05 |                          |
|                 | 0.000255928393669603 |                      |                      |                          |
| ENSG00000132676 | 1                    | 155687960            | 155739010            | protein_coding DAP3      |
|                 | 51050                | 0.1733342520374069   | .49838177105625e-24  | 1.64052427506968e-22     |
|                 | 0.2001088233028156   | .16451363835449e-30  | 1.31918898313083e-28 |                          |
|                 | 0.0570027720987811   | 0.000411526445040611 | 0.0021754904944987   |                          |
|                 | 0.0545680985111288   | 0.000755791494865406 | 0.00575768982812135  |                          |
|                 | 0.0847599625784561   | 2.56576849006796e-07 | 3.60109074835755e-06 |                          |
|                 | 0.1152578440689433   | .28337436055926e-12  | 4.79846990273477e-11 |                          |
| ENSG00000132768 | 1                    | 43970000             | 43973369             | protein_coding DPH2 3369 |
|                 | 0.3232340764939152   | .03423293781773e-22  | 3.07384238004486e-21 |                          |

|                 |                      |                      |                      |                      |         |
|-----------------|----------------------|----------------------|----------------------|----------------------|---------|
|                 | 0.3518037766569028   | .89436966696323e-26  | 1.38843071183988e-24 |                      |         |
|                 | 0.1227934851624838   | .58732783202562e-05  | 0.000569527374606757 |                      |         |
|                 | 0.1013580335505630   | .00120606722730701   | 0.00831385899744065  |                      |         |
|                 | 0.1669149391204      | 1.53642090027862e-07 | 2.28423484347018e-06 |                      |         |
|                 | 0.0995381774621009   | 0.00141334238717652  | 0.00453241273154035  |                      |         |
| ENSG00000133019 | 1                    | 239386565            | 239915452            | protein_coding       | CHRM3   |
|                 | 528887               | 0.3714158965381290   | .00015573417452967   |                      |         |
|                 | 0.000354601389213349 | 0.5349211674768216   | .45534248717337e-08  |                      |         |
|                 | 2.16551891166977e-07 | 0.3039482512925210   | .00184677968405995   |                      |         |
|                 | 0.00771527342896246  | 0.3388076334812110   | .000558586624838076  |                      |         |
|                 | 0.00454186901271001  | 0.29815450016005     | 0.00240295221929093  |                      |         |
|                 | 0.00998282469982224  | 0.4258483950530111   | .41763867463944e-05  |                      |         |
|                 | 7.22689558645545e-05 |                      |                      |                      |         |
| ENSG00000133488 | 22                   | 30488913             | 30505711             | protein_coding       | SEC14L4 |
|                 | 16798                | 1.22709843239062     | 1.3158459964308e-33  | 6.42619585529639e-32 |         |
|                 | 1.75903045082305     | 1.2994878357376e-57  | 2.22469461461056e-55 |                      |         |
|                 | 0.5285184048715351   | .64221532216231e-08  | 2.98530600979774e-07 |                      |         |
|                 | 0.5278008906367441   | .98148780477385e-08  | 1.10788869333392e-06 |                      |         |
|                 | 0.6462460108998661   | .18367711200862e-11  | 4.82735752041422e-10 |                      |         |
|                 | 1.8791140569142      | 2.14303727318152e-63 | 1.51756262176795e-60 |                      |         |
| ENSG00000134077 | 3                    | 9362842              | 9386791              | protein_coding       | THUMPD3 |
|                 | 23949                | 0.1485597593891063   | .13098041834323e-15  | 2.28466247950207e-14 |         |
|                 | 0.1887562248005191   | .20470386653136e-22  | 1.45263788983684e-21 |                      |         |
|                 | 0.0666211774350209   | 0.000238538315475399 | 0.00137128723866835  |                      |         |
|                 | 0.0692391766334364   | 0.000145452692939176 | 0.00157799965410823  |                      |         |
|                 | 0.1103312618967142   | .82286740499337e-09  | 6.66325019733207e-08 |                      |         |
|                 | 0.0680281335469139   | 0.000178654590608776 | 0.000709653204256533 |                      |         |
| ENSG00000134216 | 1                    | 111290862            | 111320566            | protein_coding       | CHIA    |
|                 | 29704                | 0.7668542340593284   | .4125039264656e-10   | 1.94132727112137e-09 |         |
|                 | 2.673452283333559    | 6.75836307318972e-72 | 3.39640446184589e-69 |                      |         |
|                 | 0.8674238631170851   | .80731484998671e-12  | 7.23808690178484e-11 |                      |         |
|                 | 0.8375530179602541   | .08920870988203e-11  | 1.80518962672895e-09 |                      |         |
|                 | 1.12916293147985     | 3.88538830734721e-19 | 6.65169938902882e-17 |                      |         |
|                 | 3.07552880884444     | 3.89181295163351e-86 | 1.03572265519137e-82 |                      |         |
| ENSG00000134375 | 1                    | 201955491            | 201970661            | protein_coding       | TIMM17A |
|                 | 15170                | 0.2244700310598534   | .97785471090063e-22  | 7.16066468523739e-21 |         |
|                 | 0.2552753422262353   | .67033246427638e-27  | 6.3462940578204e-26  |                      |         |
|                 | 0.1189366519700747   | .70471898285009e-08  | 1.16876160695055e-06 |                      |         |
|                 | 0.1036493852005372   | .81651439230965e-06  | 6.30437898244139e-05 |                      |         |
|                 | 0.1548284890178677   | .67427306531942e-12  | 3.27492662643557e-10 |                      |         |
|                 | 0.2134834215574811   | .94838676250024e-20  | 7.1930328346129e-19  |                      |         |
| ENSG00000134684 | 1                    | 32775237             | 32818153             | protein_coding       | YARS    |
|                 | 42916                | 0.3119546490640632   | .20281297800285e-30  | 7.85300306277035e-29 |         |
|                 | 0.5910111403041672   | .64296994087028e-76  | 1.96070612899134e-73 |                      |         |
|                 | 0.0884354870775557   | 0.000385244737069168 | 0.00205961831118757  |                      |         |
|                 | 0.1808528995703381   | .90488369284077e-12  | 3.7095228813458e-10  |                      |         |
|                 | 0.3064363030007382   | .63191448061381e-29  | 1.51861465531417e-26 |                      |         |
|                 | 0.2963798060818233   | .20100803459753e-28  | 2.58386031974067e-26 |                      |         |
| ENSG00000134824 | 11                   | 61792980             | 61867354             | protein_coding       | FADS2   |
|                 | 74374                | 0.2198677198681363   | .9495253315648e-05   | 9.71878931297552e-05 |         |
|                 | 0.4908539470640461   | .59574027490787e-18  | 1.37881518262838e-17 |                      |         |
|                 | 0.7456274403330491   | .48107384137549e-36  | 1.00320214672994e-33 |                      |         |
|                 | 0.2264397482450582   | .34207851105483e-05  | 0.000355973084133885 |                      |         |

|                 |                      |                      |                      |
|-----------------|----------------------|----------------------|----------------------|
|                 | 0.2432722870766216   | .39734496110078e-06  | 6.14074166044295e-05 |
|                 | 0.6324042969863373   | .01975062086996e-28  | 2.45024452721527e-26 |
| ENSG00000136478 | 17                   | 64147227             | 64263301             |
|                 | protein_coding       | TEX2                 |                      |
|                 | 116074               | 0.1749911175466523   | .37907639332981e-17  |
|                 | 2.98936008697814e-16 | 0.2993279882536731   | .18352486423705e-40  |
|                 | 5.85337582855524e-39 | 0.1333584907937934   | .56494448283423e-11  |
|                 | 1.41386222858995e-09 | 0.0653607541004755   | 0.00101937418506561  |
|                 | 0.00732510628650238  | 0.0917472257955083   | 5.17052886453298e-06 |
|                 | 5.08212423852109e-05 | 0.3316745382908281   | .07013025478106e-47  |
|                 | 3.03119258895165e-45 |                      |                      |
| ENSG00000138074 | 2                    | 27199587             | 27212958             |
|                 | protein_coding       | SLC5A6               |                      |
|                 | 13371                | 0.2530253038466066   | .19044555072313e-22  |
|                 | 8.85591838702623e-21 | 0.2514087338546819   | .78829331900816e-22  |
|                 | 1.10903142994057e-20 | 0.1023707631634753   | .72069913268313e-05  |
|                 | 0.000277343405684548 | 0.0956436981551105   | 0.000122422590909265 |
|                 | 0.00137544767649813  | 0.1028644775904794   | .00173848995413e-05  |
|                 | 0.000302049825266451 | 0.1488662872601323   | .23313453137101e-09  |
|                 | 3.12075606345904e-08 | ENSG00000138109      | 10                   |
|                 | 94938658             | 94989390             | protein_coding       |
|                 | CYP2C9               | 50732                | 0.20331767578905     |
|                 | 0.000523985257670888 | 0.00110417507497021  | 1.04122707242463     |
|                 | 1.10437364056139e-51 | 1.21162232016239e-49 | 0.4809295154757311   |
|                 | 1.93484543466076e-15 | 1.27724394180424e-13 | 0.4936854281254995   |
|                 | 4.2587288005539e-16  | 2.11324183995957e-13 | 0.5340404886859764   |
|                 | 7.5410690010695e-18  | 6.98719164120435e-16 | 0.81472153779313     |
|                 | 3.30422209315889e-36 | 4.8562713197474e-34  | ENSG00000138115      |
|                 | 10                   | 95036772             | 95069497             |
|                 | protein_coding       | CYP2C8               | 32725                |
|                 | 0.7706046738411492   | .34946410567857e-10  | 1.06340212964458e-09 |
|                 | 2.04631396510802     | 3.89105260238862e-49 | 3.67386112076438e-47 |
|                 | 3.67386112076438e-47 | 1.01983065981974     | 1.50704423926128e-16 |
|                 | 1.18576980825513e-14 | 1.15460931154534     | 3.90027425478084e-20 |
|                 | 2.53176552563461e-17 | 1.37200178957462     | 2.03417502426511e-26 |
|                 | 8.56497640622327e-24 | 1.84279411744726     | 1.67155784425814e-42 |
|                 | 3.61683328551355e-40 | ENSG00000138356      | 2                    |
|                 | 200585868            | 200677064            | protein_coding       |
|                 | AOX1                 | 91196                | 0.1851245169099465   |
|                 | 1.6565626626215e-06  | 1.42384570014328e-05 | 0.4208366466774761   |
|                 | 1.01869063459152e-22 | 1.23792366585814e-21 | 0.2363641212153386   |
|                 | 8.5669822233526e-09  | 1.34874370714345e-07 | 0.1563843196815440   |
|                 | 0.00110572962722204  | 0.00126942976142167  | 0.1679185037740723   |
|                 | 0.72233307147252e-05 | 0.000283848394128587 | 0.3980747650811715   |
|                 | 2.9858164237498e-21  | 2.35487459761612e-19 | ENSG00000138413      |
|                 | 2                    | 208236227            | 208266074            |
|                 | protein_coding       | IDH1                 | 29847                |
|                 | 0.3489128920136817   | .15900334002683e-20  | 8.4364684594764e-19  |
|                 | 4.1882140218708e-60  | 0.7389792983052571   | .63990663928441e-62  |
|                 | 4.1882140218708e-60  | 0.4142738338096431   | .7143379627949e-26   |
|                 | 4.85594020406941e-24 | 0.2068667554315181   | .98408720354428e-08  |
|                 | 1.10788869333392e-06 | 0.3138011561752451   | .54172164433626e-16  |
|                 | 1.76606481596431e-14 | 0.6170623553450255   | .92754916352013e-49  |
|                 | 1.79347064861497e-46 | ENSG00000140284      | 15                   |
|                 | 50182196             | 50236395             | protein_coding       |
|                 | SLC27A2              | 54199                | 0.2552858563306051   |
|                 | 1.15569653713157e-05 | 3.04646300371789e-05 | 0.9971154622772941   |
|                 | 1.26057104584569e-49 | 1.21977865361677e-47 | 0.3636597475568025   |
|                 | 8.5075935400624e-10  | 1.43768107217765e-08 | 0.2804789002940421   |
|                 | 5.3829543081988e-06  | 3.79795634179762e-05 | 0.3404114570110488   |
|                 | 1.8144258018618e-09  | 1.7062743501569e-07  | 1.06800470165914     |
|                 | 3.94550548699809e-55 | 1.8626372721801e-52  | ENSG00000140961      |
|                 | 16                   | 83948282             | 83966332             |
|                 | protein_coding       | OSGIN1               | 18050                |
|                 | 0.8025119394743144   | .66930415878682e-46  | 1.05424767376435e-43 |



|                 |                      |                      |                     |                        |
|-----------------|----------------------|----------------------|---------------------|------------------------|
|                 | 0.8808235990299269   | .7044081878261e-53   |                     | 1.18113261842299e-50   |
|                 | 0.22844190549116     | 3.47374041991442e-06 |                     | 3.48021877825381e-05   |
|                 | 0.3617117350350557   | .78002362665692e-13  |                     | 1.68340261221789e-10   |
|                 | 0.3041912343732711   | .37027423727787e-09  |                     | 3.51688671211729e-08   |
|                 | 0.2843346032442381   | .0122907423227e-08   |                     | 9.13700896561142e-08   |
| ENSG00000141179 | 17                   | 55750979             | 55842830            | protein_coding PCTP    |
|                 | 91851                | 0.2241167339854011   | .42863612692214e-11 | 7.2877282977472e-11    |
|                 | 0.6279765722368966   | .80169747048995e-59  |                     | 1.30819314682423e-56   |
|                 | 0.2464980588771071   | .19663652378011e-13  |                     | 5.91822235046677e-12   |
|                 | 0.1902087574756347   | .37768821036373e-09  |                     | 5.01908317158326e-07   |
|                 | 0.2476287609609571   | .52474560155434e-13  |                     | 1.00652592061928e-11   |
|                 | 0.4812203235166393   | .3835738233077e-40   |                     | 6.27532102301317e-38   |
| ENSG00000141401 | 18                   | 11981025             | 12030883            | protein_coding IMPA2   |
|                 | 49858                | 0.8331568838113735   | .129142119539e-26   | 1.13989878859198e-24   |
|                 | 0.88040164821        | 1.77737657898079e-28 |                     | 3.41848762023971e-27   |
|                 | 0.2390035115363720   | .00113152479184011   |                     | 0.00511979161630279    |
|                 | 0.2738547681480560   | .000210747834249833  |                     | 0.00210849092391258    |
|                 | 0.37354399214597     | 5.8311995393465e-07  |                     | 7.36177128229167e-06   |
|                 | 0.4508958815672361   | .5979496379832e-09   |                     | 1.62073290430601e-08   |
| ENSG00000141485 | 17                   | 6684713              | 6713567             | protein_coding SLC13A5 |
|                 | 28854                | 1.52579282925711     | .16376667253744e-17 | 1.07407114878323e-16   |
|                 | 2.20335624773516     | 3.6649410663053e-32  |                     | 9.3753886489278e-31    |
|                 | 0.5562244051256560   | .00111249234857917   |                     | 0.00505562618453061    |
|                 | 0.8007060638293483   | .44677190359527e-06  |                     | 7.47872694792628e-05   |
|                 | 1.26910038878298     | 6.54969070849574e-13 |                     | 3.64420112670197e-11   |
|                 | 2.20031658330881     | 2.83387696588044e-32 |                     | 3.17618483823391e-30   |
| ENSG00000142207 | 21                   | 32311018             | 32393026            | protein_coding URB1    |
|                 | 82008                | 0.3020542489234691   | .43493572764664e-26 | 3.43920980015493e-25   |
|                 | 0.3517611963062356   | .9115512448016e-34   |                     | 2.0587964979496e-32    |
|                 | 0.1115356910108562   | .30589211152343e-05  |                     | 0.000182630875472412   |
|                 | 0.1086543742004784   | .00041289222259e-05  |                     | 0.000551038306347796   |
|                 | 0.1969793360859224   | .68432577164887e-13  |                     | 2.69288233197482e-11   |
|                 | 0.1923899779488969   | .79534889527474e-13  |                     | 1.54299029766921e-11   |
| ENSG00000142655 | 1                    | 10472288             | 10630758            | protein_coding PEX14   |
|                 | 158470               | 0.1721136917490665   | .88815301137292e-09 |                        |
|                 | 2.30023788103282e-08 | 0.3504234148253388   | .25907196689811e-29 |                        |
|                 | 1.61643319311942e-27 | 0.1012894105028630   | .000479679916412643 |                        |
|                 | 0.00247284361938867  | 0.1017938662259340   | .000477615609851168 |                        |
|                 | 0.00401552810894298  | 0.1871933784670223   | .38971308939961e-10 |                        |
|                 | 9.92637974055573e-09 | 0.0848106752486508   | 0.00341021809923986 |                        |
|                 | 0.009838479216307    |                      |                     |                        |
| ENSG00000142657 | 1                    | 10398592             | 10420144            | protein_coding PGD     |
|                 | 21552                | 0.6250652133643246   | .10125906239108e-39 | 5.72599487548136e-37   |
|                 | 1.08681494564858     | 1.37686529597378e-83 |                     | 1.65001418815197e-80   |
|                 | 0.3465728548570113   | .6829853482872e-15   |                     | 2.32296472635491e-13   |
|                 | 0.2783961399356821   | .74550347874888e-10  |                     | 2.07581669430754e-08   |
|                 | 0.3750416074543255   | .2494652193304e-17   |                     | 6.43948178361797e-15   |
|                 | 0.8428996117051131   | .57063285040255e-60  |                     | 1.01953704901755e-57   |
| ENSG00000143653 | 1                    | 246724047            | 246768137           | protein_coding SCCPDH  |
|                 | 44090                | 0.3223235025670184   | .09842574708933e-29 | 1.29511916255385e-27   |
|                 | 0.5910967176626191   | .02289818856345e-70  |                     | 4.97991589988436e-68   |
|                 | 0.1826130773614421   | .48265985147753e-11  |                     | 4.99964455111871e-10   |
|                 | 0.2094838075677512   | .21940287689642e-14  |                     | 7.05634233044273e-12   |

|                 |                    |                       |                       |                      |         |
|-----------------|--------------------|-----------------------|-----------------------|----------------------|---------|
|                 | 0.2948616976255094 | .94071689707511e-25   | 1.87735191559837e-22  |                      |         |
|                 | 0.3584597183591071 | .09673028007797e-34   | 1.44796279943514e-32  |                      |         |
| ENSG00000143819 | 1                  | 225810092             | 225845563             | protein_coding       | EPHX1   |
|                 | 35471              | 0.6938418583540732    | .86714653489714e-25   | 5.91619547909437e-24 |         |
|                 | 1.23989198731284   | 1.6297535142286e-60   | 3.57604647861512e-58  |                      |         |
|                 | 0.2366955941239230 | .000139882618211805   | 0.000867528387389217  |                      |         |
|                 | 0.5686369408359483 | .01465197908873e-18   | 1.42318979340071e-15  |                      |         |
|                 | 0.7463868470528723 | .64544294257908e-28   | 1.83201147104644e-25  |                      |         |
|                 | 0.9309154085715982 | .1237730601031e-40    | 4.03490981748124e-38  |                      |         |
| ENSG00000144224 | 2                  | 135741619             | 135785055             | protein_coding       | UBXN4   |
|                 | 43436              | 0.1593116647280431    | .70455390085605e-21   | 2.34173238284272e-20 |         |
|                 | 0.2057918578753451 | .92951188705166e-32   | 5.06911731675849e-31  |                      |         |
|                 | 0.0519030232477116 | 0.00097678202426363   | 0.00452356930915668   |                      |         |
|                 | 0.0508619334220377 | 0.0012960843872463    | 0.00882118771031462   |                      |         |
|                 | 0.0547181121365163 | 0.000581979046459956  | 0.00301618481862929   |                      |         |
|                 | 0.1477992575300673 | .67614901341584e-19   | 1.19813233221769e-17  |                      |         |
| ENSG00000144381 | 2                  | 197486581             | 197516737             | protein_coding       | HSPD1   |
|                 | 30156              | 0.2828922076750065    | .27504484722368e-36   | 3.46750732805476e-34 |         |
|                 | 0.4113137999535244 | .19720950599152e-62   | 1.05465043377164e-59  |                      |         |
|                 | 0.1507658352209934 | .66882732704248e-13   | 2.08177382067396e-11  |                      |         |
|                 | 0.1917681107386522 | .80396031705151e-19   | 1.56010349211948e-16  |                      |         |
|                 | 0.2180195810768651 | .36568639555498e-23   | 3.86836879206382e-21  |                      |         |
|                 | 0.2174496437826456 | .86377026555809e-24   | 3.86031324791081e-22  |                      |         |
| ENSG00000144867 | 3                  | 133784033             | 133825772             | protein_coding       | SRPRB   |
|                 | 41739              | 0.4695719638392594    | .15814653242872e-49   | 1.40825575714581e-46 |         |
|                 | 0.3676618617094996 | .11081880734791e-34   | 1.83077781153218e-32  |                      |         |
|                 | 0.1027126438549340 | .000179179866059627   | 0.00107363197436267   |                      |         |
|                 | 0.1068960421323450 | .000105196945101863   | 0.00122394563684983   |                      |         |
|                 | 0.1050302706959370 | .000148033107464944   | 0.000934822773083245  |                      |         |
|                 | 0.1197528331698091 | .3475922903521e-05    | 6.89462735349603e-05  |                      |         |
| ENSG00000146731 | 7                  | 56051630              | 56063989              | protein_coding       | CCT6A   |
|                 | 12359              | 0.2066640334649693    | .35204806968098e-26   | 7.64590876684626e-25 |         |
|                 | 0.1300215250857973 | .1762363571742e-12    | 1.62718139455498e-11  |                      |         |
|                 | 0.0857526048446831 | 2.53289855020727e-06  | 2.63946665643338e-05  |                      |         |
|                 | 0.0671344552740383 | 0.000225746183023981  | 0.00222447804258735   |                      |         |
|                 | 0.0909488080313432 | 8.01201077907479e-07  | 9.79741883259075e-06  |                      |         |
|                 | 0.0673709247243330 | .000200290098691162   | 0.000785974671916777  |                      |         |
| ENSG00000147852 | 9                  | 2621834               | 2660053               | protein_coding       | VLDLR   |
|                 | 38219              | 0.7034510698582773    | .2010013179037e-27    | 8.21555181740063e-26 |         |
|                 | 1.04628586907652   | 3.72616628321577e-50  | 3.74515771136894e-48  |                      |         |
|                 | 0.3925449586432211 | .67423562997345e-10   | 4.52828418044382e-09  |                      |         |
|                 | 0.3912357876708012 | .29580448749573e-10   | 2.5984875401449e-08   |                      |         |
|                 | 0.5551823868951212 | .4081198473919e-18    | 3.71446525767509e-16  |                      |         |
|                 | 0.7354907215748681 | .96177360827347e-29   | 1.70740061694371e-27  |                      |         |
| ENSG00000148248 | 9                  | 133361449             | 133376166             | protein_coding       | SURF4   |
|                 | 14717              | 0.2761666247808622    | .98230566634621e-46   | 7.03959696606176e-44 |         |
|                 | 0.15873717236069   | 2.7603748941622e-19   | 2.53560616015053e-18  |                      |         |
|                 | 0.0574767563379410 | .000602758894994522   | 0.00299820588286068   |                      |         |
|                 | 0.0868671292786676 | 3.24925034795566e-07  | 1.0886036810925e-05   |                      |         |
|                 | 0.0555735469631902 | 0.00101506271118222   | 0.00484190507578317   |                      |         |
|                 | 0.1758158325640235 | .04580687323191e-23   | 2.55222809344415e-21  |                      |         |
| ENSG00000148942 | 11                 | 26667019              | 26723427              | protein_coding       | SLC5A12 |
|                 | 56408              | 1.48187598541316      | 2.0916765673127e-83   | 1.08620764140549e-79 |         |
|                 | 1.88625503426145   | 5.91876828821771e-110 | 9.22084911621436e-106 |                      |         |



|                 |                    |                       |                     |                        |
|-----------------|--------------------|-----------------------|---------------------|------------------------|
|                 | 0.4832613619104092 | .77949984010225e-15   |                     | 1.77466508233414e-13   |
|                 | 0.9999710985144226 | .84793456843976e-49   |                     | 5.33419863208615e-45   |
|                 | 1.26076049413952   | 2.51371224541458e-67  |                     | 1.95805615356569e-63   |
|                 | 2.15208214779736   | 1.55540508456004e-126 |                     | 2.42316558123609e-122  |
| ENSG00000149485 | 11                 | 61799625              | 61829318            | protein_coding FADS1   |
|                 | 29693              | 0.4581881365421752    | .92517107011197e-16 | 2.36610800110459e-15   |
|                 | 0.6413592942157613 | .99456147010117e-28   |                     | 7.4439321941036e-27    |
|                 | 0.6428895375960461 | .7514395610382e-28    |                     | 6.20129020941229e-26   |
|                 | 0.2238105883187983 | .50347361903885e-05   |                     | 0.00049394222181906    |
|                 | 0.2753479409840574 | .76708123768299e-07   |                     | 6.17342964271515e-06   |
|                 | 0.3873189926690141 | .98689430290944e-12   |                     | 2.98206419508923e-11   |
| ENSG00000149547 | 11                 | 125569216             | 125584687           | protein_coding EI24    |
|                 | 15471              | 0.1536713250414699    | .0780484400461e-11  | 4.27400775604346e-10   |
|                 | 0.3407552016148963 | .62299949928036e-39   |                     | 1.60805439314213e-37   |
|                 | 0.0908432009989095 | 8.77728415179788e-05  |                     | 0.000580642504462247   |
|                 | 0.0843074903725318 | 0.000285286904900832  |                     | 0.00269689605063718    |
|                 | 0.0742388900559270 | .00144206026373836    |                     | 0.00654408879952808    |
|                 | 0.3415975483670351 | .29046635879388e-39   |                     | 2.31082475904021e-37   |
| ENSG00000149925 | 16                 | 30053090              | 30070457            | protein_coding ALDOA   |
|                 | 17367              | 0.5242397417598375    | .24071242883904e-42 | 7.03836714904167e-40   |
|                 | 0.2137552939808327 | .3646493192469e-10    |                     | 2.983297309127e-09     |
|                 | 0.1615939414913562 | .22864433895124e-06   |                     | 2.35230692117353e-05   |
|                 | 0.1386790231200624 | .94550067075977e-05   |                     | 0.000657388694110635   |
|                 | 0.1534362355243058 | .34462633481421e-06   |                     | 7.65612094641169e-05   |
|                 | 0.1043312366015710 | .00204231777654474    |                     | 0.00628675531333541    |
| ENSG00000151632 | 10                 | 4987400               | 5018031             | protein_coding AKR1C2  |
|                 | 30631              | 0.4467489523019061    | .31717690260977e-20 | 1.65219798436051e-19   |
|                 | 0.8289655344506231 | .27415602222911e-53   |                     | 1.65417305585894e-51   |
|                 | 0.2147362392720962 | .51533142185666e-06   |                     | 2.62600966106531e-05   |
|                 | 0.2432972883231931 | .25161254948465e-07   |                     | 5.1448210840162e-06    |
|                 | 0.5077299035840963 | .6111251067685e-25    |                     | 1.40644295095866e-22   |
|                 | 0.3699067914044023 | .15305168668172e-15   |                     | 6.67410220473024e-14   |
| ENSG00000154174 | 3                  | 100363431             | 100401398           | protein_coding TOMM70  |
|                 | 37967              | 0.1776407781844331    | .5975822088477e-37  | 1.20819093357468e-35   |
|                 | 0.1608021019854223 | .90262756691161e-32   |                     | 9.95074220375057e-31   |
|                 | 0.0628276565310832 | 5.07210128560442e-07  |                     | 6.24650323544911e-06   |
|                 | 0.0583554228938397 | 3.23225528436829e-06  |                     | 7.07237430831089e-05   |
|                 | 0.0695850422723083 | 3.97031009572517e-08  |                     | 6.85550081832355e-07   |
|                 | 0.0555347429642445 | 8.31420899333515e-06  |                     | 4.43130557328663e-05   |
| ENSG00000155189 | 8                  | 6708357               | 6759666             | protein_coding AGPAT5  |
|                 | 51309              | 0.3691440215658662    | .84335554922373e-20 | 3.47424596873384e-19   |
|                 | 0.3983732417346085 | .23293197294578e-23   |                     | 6.55336392335389e-22   |
|                 | 0.2602276103175981 | .85814001647613e-11   |                     | 6.17227362829034e-10   |
|                 | 0.17784597748072   | 3.42736992457682e-06  |                     | 7.44700084448847e-05   |
|                 | 0.1864117754062671 | .29669098137281e-06   |                     | 1.50194414861019e-05   |
|                 | 0.1628323410404281 | .89407126980448e-05   |                     | 9.44852267444254e-05   |
| ENSG00000155380 | 1                  | 112911847             | 112957013           | protein_coding SLC16A1 |
|                 | 45166              | 0.2846850593081669    | .90729505822315e-18 | 9.18724700667015e-17   |
|                 | 0.3731181663233741 | .30878670297683e-27   |                     | 2.33825550982524e-26   |
|                 | 0.1306454685698383 | .90487208589727e-05   |                     | 0.000288997635278829   |
|                 | 0.1619322825371274 | .53927459452531e-07   |                     | 1.44027207552159e-05   |
|                 | 0.1733150627245288 | .20738403689815e-08   |                     | 1.3181735660911e-06    |
|                 | 0.31018311745899   | 1.42435495725015e-20  |                     | 5.33414083629811e-19   |

|                      |    |                      |                      |                |                      |      |
|----------------------|----|----------------------|----------------------|----------------|----------------------|------|
| ENSG00000156113      | 10 | 76869601             | 77638369             | protein_coding | KCNMA1               |      |
| 768768               |    | 0.2317345348106836   | .72644498641366e-05  |                |                      |      |
| 0.000160648913756459 |    | 1.09841921576556     | 1.22669382420574e-57 |                |                      |      |
| 2.12340700970014e-55 |    | 0.4712368289295132   | .5496330137499e-15   |                |                      |      |
| 1.64135259178553e-13 |    | 0.3730264747953742   | .55699784663816e-10  |                |                      |      |
| 2.7919229678556e-08  |    | 0.4068458877805948   | .15359293532339e-12  |                |                      |      |
| 3.44240716366946e-10 |    | 0.8689593740202844   | .72740412268678e-41  |                |                      |      |
| 9.20602860341717e-39 |    |                      |                      |                |                      |      |
| ENSG00000159228      | 21 | 36069941             | 36073166             | protein_coding | CBR1                 | 3225 |
| 0.6129019186022225   |    | .92077489598705e-51  | 2.42736189748901e-48 |                |                      |      |
| 0.6758722087157691   |    | .86213001537606e-58  | 3.49519560355947e-56 |                |                      |      |
| 0.2300816615464619   |    | .36665109348588e-11  | 2.69728387034042e-09 |                |                      |      |
| 0.1940801670268      |    | 4.18156972706518e-08 | 2.04215281435575e-06 |                |                      |      |
| 0.3167092643801156   |    | .26319566208023e-18  | 8.95177295592182e-16 |                |                      |      |
| 0.1750452705792336   |    | .11232738745718e-07  | 4.08686473687534e-06 |                |                      |      |
| ENSG00000160181      | 21 | 42346357             | 42351128             | protein_coding | TFF2                 | 4771 |
| 1.80645839391851     |    | 5.83461248416584e-05 | 0.000140360450727022 |                |                      |      |
| 2.08049486160698     |    | 3.81510686928531e-06 | 1.05719583629662e-05 |                |                      |      |
| 1.64896625825912     |    | 0.000221814178293038 | 0.00128893811399748  |                |                      |      |
| 1.7113416847918      |    | 0.000136562247531694 | 0.00149929757173803  |                |                      |      |
| 1.79481190718911     |    | 6.84252397476344e-05 | 0.000480583048542716 |                |                      |      |
| 2.15838899236003     |    | 1.54774720867841e-06 | 9.5155302936073e-06  |                |                      |      |
| ENSG00000160460      | 19 | 40466241             | 40576464             | protein_coding | SPTBN4               |      |
| 110223               |    | 0.8527619777747133   | .1641055583571e-11   |                |                      |      |
| 1.55451278756371e-10 |    | 1.73490306666217     | 7.68169983855787e-36 |                |                      |      |
| 2.64763720763038e-34 |    | 0.4363749786436570   | .000495180163260428  |                |                      |      |
| 0.00254433105654162  |    | 0.42477305317136     | 0.000733916682638708 |                |                      |      |
| 0.00564069462201699  |    | 0.5211374644982173   | .98094669960992e-05  |                |                      |      |
| 0.000300917848778374 |    | 0.6912455410484644   | .93409129774412e-08  |                |                      |      |
| 3.98900925415442e-07 |    |                      |                      |                |                      |      |
| ENSG00000160796      | 3  | 46979683             | 47009703             | protein_coding | NBEAL2               |      |
| 30020                |    | 0.2052412052207831   | .87573757226725e-06  |                | 5.45697771024303e-06 |      |
| 0.4859967930884762   |    | .49624918301911e-26  | 4.0678939353823e-25  |                |                      |      |
| 0.1465275230639160   |    | .00057408077791926   | 0.00287832689108486  |                |                      |      |
| 0.1582818251714930   |    | .000217180237940416  | 0.00215506428463296  |                |                      |      |
| 0.2031319458921252   |    | .60548744105795e-06  | 2.80905805150462e-05 |                |                      |      |
| 0.4006144264379362   |    | .79725885375609e-19  | 9.23273213615806e-18 |                |                      |      |
| ENSG00000160868      | 7  | 99756960             | 99784265             | protein_coding | CYP3A4               |      |
| 27305                |    | 2.41381326846621     | 2.41915205523491e-33 |                | 1.14902347160075e-31 |      |
| 4.24177714648775     |    | 4.8776528215668e-74  | 2.92265205027651e-71 |                |                      |      |
| 2.5403679261252      |    | 2.52353758577523e-36 | 1.53484408907196e-33 |                |                      |      |
| 2.76660072504546     |    | 4.93210160676956e-41 | 2.56124036439544e-37 |                |                      |      |
| 3.18943852682501     |    | 4.13180312788389e-50 | 1.07282268215505e-46 |                |                      |      |
| 4.43281409279343     |    | 8.64786804135121e-79 | 1.49694595795789e-75 |                |                      |      |
| ENSG00000160870      | 7  | 99705037             | 99735196             | protein_coding | CYP3A7               |      |
| 30159                |    | 0.8956074293203092   | .41304036826534e-13  |                | 1.47944730016551e-12 |      |
| 2.22543360421426     |    | 1.36357581802323e-56 | 2.16766812948816e-54 |                |                      |      |
| 1.35924909326385     |    | 8.39908952443469e-27 | 2.46885690002204e-24 |                |                      |      |
| 1.69488736736011     |    | 9.14795918913676e-38 | 2.85032112415123e-34 |                |                      |      |
| 1.72002467870683     |    | 2.16081198546023e-38 | 2.40452070867749e-35 |                |                      |      |
| 1.75618797154027     |    | 4.05984263746036e-40 | 7.44097511164647e-38 |                |                      |      |
| ENSG00000161996      | 16 | 649311               | 667833               | protein_coding | WDR90                |      |
| 18522                |    | 0.2501982832067162   | .06598410108331e-11  |                | 1.0369190177441e-10  |      |
| 0.5338230600053233   |    | .61095914370538e-39  | 1.60728949999389e-37 |                |                      |      |

|                    |                       |                      |                      |
|--------------------|-----------------------|----------------------|----------------------|
| 0.2354239420448252 | .09153830946162e-10   | 5.61794402122459e-09 |                      |
| 0.22336307758274   | 1.76309914345372e-09  | 1.48472008410084e-07 |                      |
| 0.226206040654976  | 1.30447907216204e-09  | 3.35908751491113e-08 |                      |
| 0.127750900218988  | 0.000447988708716686  | 0.00162118840722352  |                      |
| ENSG00000162496    | 1 12567910 12617731   | protein_coding       | DHRS3                |
| 49821              | 0.1418482665915814    | .80999045678968e-05  | 0.00011703083137018  |
| 0.457759568839164  | 4.36201509296175e-33  | 1.21566785569322e-31 |                      |
| 0.135154040848511  | 9.81558163212556e-05  | 0.000639017744449996 |                      |
| 0.122723506857281  | 0.000420588634060719  | 0.00365236919176809  |                      |
| 0.181145802588721  | 2.88536634732922e-07  | 3.98502857491507e-06 |                      |
| 0.345065391414227  | 3.70576535110215e-21  | 1.51131200012619e-19 |                      |
| ENSG00000162927    | 2 60940222 61018259   | protein_coding       | PUS10                |
| 78037              | 0.1184203914620190    | .000777763793238615  | 0.00159578323914979  |
| 0.493703919318791  | 1.15945109246269e-36  | 4.29051985023188e-35 |                      |
| 0.12449371861929   | 0.000390308540241524  | 0.00208240299603517  |                      |
| 0.133613938350895  | 0.000154086266112094  | 0.00165172940361992  |                      |
| 0.143402950279508  | 5.37067062119861e-05  | 0.000390128223141465 |                      |
| 0.367952090553158  | 5.07899083430957e-23  | 2.56069897112326e-21 |                      |
| ENSG00000163002    | 2 183117513 183161680 | protein_coding       | NUP35                |
| 44167              | 0.1569320226843295    | .30426898156821e-08  | 1.85488678931203e-07 |
| 0.430534055898046  | 3.79488445320004e-41  | 1.95763261246369e-39 |                      |
| 0.123884085635638  | 1.38200981066978e-05  | 0.000116569197836624 |                      |
| 0.150647132669759  | 1.68106640486226e-07  | 6.51475958242517e-06 |                      |
| 0.138098417779924  | 1.67127296416887e-06  | 1.8785542214132e-05  |                      |
| 0.282310645209943  | 4.04244668928281e-21  | 1.62731981840664e-19 |                      |
| ENSG00000163132    | 4 4859666 4863936     | protein_coding       | MSX1 4270            |
| 0.829151802465287  | 1.03928141357953e-14  | 7.19918414502247e-14 |                      |
| 2.04724815657361   | 3.71887608973315e-61  | 8.52005450028718e-59 |                      |
| 0.51873370239469   | 6.75856511248048e-07  | 8.0993604528718e-06  |                      |
| 0.548424365274427  | 1.82358820239773e-07  | 6.89555354494036e-06 |                      |
| 0.770317539397808  | 6.11599902759752e-13  | 3.42737945506985e-11 |                      |
| 1.20289986668459   | 1.82890500213847e-27  | 1.36983226097669e-25 |                      |
| ENSG00000163295    | 2 232456123 232460032 | protein_coding       | ALPI 3909            |
| 2.49040180683059   | 1.66379062502197e-37  | 1.24616318015467e-35 |                      |
| 3.48135984155578   | 1.75220057547734e-61  | 4.13598981293355e-59 |                      |
| 0.805619777213741  | 5.4873774423972e-06   | 5.16855218712854e-05 |                      |
| 1.27828650849294   | 1.45830814663095e-12  | 2.95051722290436e-10 |                      |
| 1.57810363720559   | 9.89495075260775e-18  | 1.37636998013282e-15 |                      |
| 4.00799582553955   | 1.66541626797067e-74  | 2.35868363988319e-71 |                      |
| ENSG00000163710    | 3 142815922 142889203 | protein_coding       | PCOLCE2              |
| 73281              | 0.4151513531899163    | .90597074978074e-24  | 7.11708986091628e-23 |
| 0.364954017575482  | 1.43858727775834e-19  | 1.36076206437141e-18 |                      |
| 0.180570320420934  | 2.87347896606799e-06  | 2.95095114122434e-05 |                      |
| 0.166180102629718  | 1.73934815480128e-05  | 0.000280801087084448 |                      |
| 0.15535077678427   | 6.17546560344284e-05  | 0.000438903187208194 |                      |
| 0.550060299703732  | 5.49895556925898e-38  | 9.01770829615638e-36 |                      |
| ENSG00000163811    | 2 28894643 28948222   | protein_coding       | WDR43                |
| 53579              | 0.3400646767355871    | .50349423345686e-25  | 3.18679410381285e-24 |
| 0.305740499678214  | 1.66313346531706e-21  | 1.8428133894861e-20  |                      |
| 0.115952385876808  | 0.000131645445836446  | 0.00082332573291288  |                      |
| 0.101076312732463  | 0.000882730596390571  | 0.00650831044068562  |                      |
| 0.14124528535145   | 4.32417419465642e-06  | 4.34341133324e-05    |                      |
| 0.156192139991081  | 3.27778902289141e-07  | 2.30021059403718e-06 |                      |

|                    |                      |                      |                      |                |         |
|--------------------|----------------------|----------------------|----------------------|----------------|---------|
| ENSG00000163931    | 3                    | 53224707             | 53256052             | protein_coding | TKT     |
| 31345              | 0.5589017679445621   | 86127322789498e-59   | 1.812298476086e-56   |                |         |
| 0.6261593951320673 | 2.2610270563941e-69  | 1.35836362300422e-66 |                      |                |         |
| 0.24830244570448   | 5.13258809534272e-17 | 4.41771215123449e-15 |                      |                |         |
| 0.2132876333011043 | 9.3933713014252e-13  | 9.44168202315235e-11 |                      |                |         |
| 0.2942027052157783 | 8.8060431869992e-22  | 9.7509572066171e-20  |                      |                |         |
| 0.3614656273825062 | 3.9151314015903e-31  | 2.37308173315526e-29 |                      |                |         |
| ENSG00000163938    | 3                    | 52681156             | 52694492             | protein_coding | GNL3    |
| 13336              | 0.3230607295371752   | 3.986354952422e-26   | 5.56905251570466e-25 |                |         |
| 0.3965108943859811 | 8.2453113189984e-36  | 6.57971539441379e-35 |                      |                |         |
| 0.0965178628768690 | 0.000622080558370723 | 0.00307858736304241  |                      |                |         |
| 0.0971676419022698 | 0.000606492811733139 | 0.00485978916537421  |                      |                |         |
| 0.1663397791851178 | 5.1508985096668e-09  | 1.76405032963045e-07 |                      |                |         |
| 0.1279374020757846 | 5.839015740555e-06   | 3.57513428449671e-05 |                      |                |         |
| ENSG00000164087    | 3                    | 52075253             | 52154690             | protein_coding | POC1A   |
| 79437              | 0.7989293009458185   | 0.7331338123309e-24  | 9.0951840237319e-23  |                |         |
| 1.14530456711875   | 1.67591509274847e-42 | 9.59892692276779e-41 |                      |                |         |
| 0.3265052686222381 | 1.15966388877092e-05 | 9.97592695922813e-05 |                      |                |         |
| 0.4189908197506122 | 6.9738150067854e-08  | 1.42933695234935e-06 |                      |                |         |
| 0.6122542155880512 | 2.29265046228321e-15 | 2.13875458394671e-13 |                      |                |         |
| 0.8232391980388812 | 1.4876575801259e-25  | 1.37195171082288e-23 |                      |                |         |
| ENSG00000164089    | 4                    | 108742040            | 108763054            | protein_coding | ETNPPL  |
| 21014              | 0.5858751374880755   | 8.1345749682951e-12  | 3.10482873990768e-11 |                |         |
| 2.35517573089242   | 9.36394484816713e-96 | 3.64702241973989e-92 |                      |                |         |
| 0.5214134963272995 | 8.8760540547772e-10  | 1.44202464493275e-08 |                      |                |         |
| 0.55365989463226   | 6.67619026131565e-11 | 9.04420592009013e-09 |                      |                |         |
| 0.8276364411356264 | 7.302391569518e-21   | 1.09988650486794e-18 |                      |                |         |
| 2.16391553502728   | 3.87280598998675e-87 | 1.50836111295009e-83 |                      |                |         |
| ENSG00000165841    | 10                   | 94762624             | 94853260             | protein_coding | CYP2C19 |
| 90636              | 0.6262670398279353   | 5.8701664334306e-09  | 1.43692806085476e-08 |                |         |
| 1.4111550333733    | 7.49401924055276e-35 | 2.38751177399942e-33 |                      |                |         |
| 0.3424946397166030 | 0.00100608534978233  | 0.00463859238362207  |                      |                |         |
| 0.5602545183531031 | 1.161592422284e-07   | 4.81288519860701e-06 |                      |                |         |
| 0.7603892534104621 | 1.56900418064811e-12 | 7.96205737143875e-11 |                      |                |         |
| 1.27665232900767   | 8.33540292088618e-30 | 7.42041383454204e-28 |                      |                |         |
| ENSG00000166347    | 18                   | 74250847             | 74292016             | protein_coding | CYB5A   |
| 41169              | 0.51033113096006     | 4.86420003817725e-29 | 1.51558744789527e-27 |                |         |
| 1.02157171730306   | 1.04978757706332e-78 | 8.60770561214179e-76 |                      |                |         |
| 0.3989087958559131 | 1.27318560156389e-19 | 1.57420305450507e-17 |                      |                |         |
| 0.4870551970610386 | 0.09754957929355e-27 | 9.49937248958142e-24 |                      |                |         |
| 0.6227449183971232 | 8.1388152593701e-39  | 3.3721123301979e-36  |                      |                |         |
| 0.4648553552143883 | 2.6976532134847e-25  | 2.04577003780272e-23 |                      |                |         |
| ENSG00000167721    | 17                   | 2322503              | 2337507              | protein_coding | TSR1    |
| 15004              | 0.3575387536553041   | 9.2207721135666e-39  | 1.95712685462258e-37 |                |         |
| 0.2762009262431782 | 6.6061578850294e-26  | 4.29976487231195e-25 |                      |                |         |
| 0.0946113417668384 | 9.31408670889914e-05 | 0.000610194099402606 |                      |                |         |
| 0.0878091691354923 | 0.000299894920592196 | 0.00279429603343649  |                      |                |         |
| 0.0972975216208176 | 8.8059813281277e-05  | 0.000482850623022928 |                      |                |         |
| 0.0946770830992829 | 2.8990535391463e-05  | 0.000395538222215458 |                      |                |         |
| ENSG00000168003    | 11                   | 62856102             | 62888875             | protein_coding | SLC3A2  |
| 32773              | 0.8119445688800488   | 9.4789733563958e-48  | 2.40343607917119e-45 |                |         |
| 1.24417333423208   | 1.31832940491419e-84 | 1.71152114992985e-81 |                      |                |         |
| 0.3206103467258847 | 3.6438982490941e-11  | 2.17703660497654e-09 |                      |                |         |
| 0.3081849428215234 | 2.0276322805412e-10  | 4.30755581117468e-08 |                      |                |         |

|                 |                    |                      |                      |                          |
|-----------------|--------------------|----------------------|----------------------|--------------------------|
|                 | 0.64317782048137   | 2.55296884295245e-33 | 1.89393817163601e-30 |                          |
|                 | 0.1583524785601820 | 0.00100979771708401  | 0.00335214971967862  |                          |
| ENSG00000168710 | 1                  | 109984686            | 110023741            | protein_coding AHCYL1    |
|                 | 39055              | 0.1583188054611445   | 0.04374284669035e-20 | 6.04899690597298e-19     |
|                 | 0.2915753973261247 | 7.27515391179041e-52 | 8.15392969725056e-50 |                          |
|                 | 0.0650199515827108 | 7.26554027462147e-05 | 0.000492558102429625 |                          |
|                 | 0.0671723703638811 | 4.56660212402556e-05 | 0.000616491286743451 |                          |
|                 | 0.0749825249704728 | 6.30480470644587e-06 | 6.06146565047807e-05 |                          |
|                 | 0.2250439757206841 | 1.61045435346751e-35 | 2.28084257933367e-33 |                          |
| ENSG00000169241 | 1                  | 155135344            | 155138857            | protein_coding SLC50A1   |
|                 | 3513               | 0.1989797140725959   | 6.8976743079111e-07  | 2.9159143674772e-06      |
|                 | 0.4541909579595516 | 0.00164921798507e-26 | 9.43488326609378e-25 |                          |
|                 | 0.3619945179774675 | 3.4351460826396e-18  | 5.47675092645686e-16 |                          |
|                 | 0.1628513935559335 | 5.57781209749075e-05 | 0.000727778347293202 |                          |
|                 | 0.1552845323688790 | 0.000128089530939662 | 0.000826639106258906 |                          |
|                 | 0.1217563887148170 | 0.0023784871008112   | 0.00718806024122944  |                          |
| ENSG00000170542 | 6                  | 2887266              | 2903280              | protein_coding SERPINB9  |
|                 | 16014              | 0.6004453666926452   | 5.634085250555e-12   | 1.41614685857587e-11     |
|                 | 1.16979271221604   | 1.20746183580418e-36 | 4.45759429857662e-35 |                          |
|                 | 0.3727815633904828 | 5.8635035601143e-06  | 7.67451246106151e-05 |                          |
|                 | 0.4372521415153    | 2.303266730075e-07   | 8.42314375301372e-06 |                          |
|                 | 0.6167774665710558 | 5.6086855730823e-13  | 4.63089483521892e-11 |                          |
|                 | 1.49234419862872   | 5.84963207852393e-53 | 2.33670302952113e-50 |                          |
| ENSG00000170627 | 12                 | 54455950             | 54473602             | protein_coding GTSF1     |
|                 | 17652              | 1.27763187556138     | 5.45974571042471e-05 | 0.000131749346999236     |
|                 | 1.57946884896268   | 6.65506905744205e-07 | 2.02143343431253e-06 |                          |
|                 | 1.46945731055209   | 3.32468628398283e-06 | 3.34811167538258e-05 |                          |
|                 | 1.53329393073716   | 1.38610846516424e-06 | 3.49049709815658e-05 |                          |
|                 | 1.36687558265872   | 1.75345406293955e-05 | 0.000146629419466104 |                          |
|                 | 1.54774193896802   | 9.83477176234663e-07 | 6.30518145208223e-06 |                          |
| ENSG00000171490 | 16                 | 11833850             | 11851585             | protein_coding RSL1D1    |
|                 | 17735              | 0.2402845639172673   | 9.619434528659e-28   | 1.12428264211654e-26     |
|                 | 0.3057378352428675 | 6.2878318795227e-41  | 2.85637828290256e-39 |                          |
|                 | 0.0776852922367164 | 0.000118056753484248 | 0.000753155676712163 |                          |
|                 | 0.1113043565336245 | 4.8050545835328e-08  | 2.55631121364328e-06 |                          |
|                 | 0.1361918261182455 | 4.9404296750957e-11  | 1.93209244674563e-09 |                          |
|                 | 0.1432905534086853 | 9.8592889093178e-12  | 5.77644522714663e-11 |                          |
| ENSG00000171867 | 20                 | 4686236              | 4701590              | protein_coding PRNP      |
|                 | 15354              | 0.1128361750964072   | 1.6208749268914e-07  | 7.05702096136689e-07     |
|                 | 0.2025841172134652 | 9.6620616484723e-19  | 2.71188531937529e-18 |                          |
|                 | 0.0708770552268829 | 0.000938318088299766 | 0.00437666392144373  |                          |
|                 | 0.0935359658121673 | 1.5408181128766e-05  | 0.000254283955301955 |                          |
|                 | 0.0747263202405968 | 0.000553314296094275 | 0.00289264544256802  |                          |
|                 | 0.1258771355110797 | 7.33822748312474e-09 | 6.72483799762355e-08 |                          |
| ENSG00000171903 | 19                 | 15912367             | 15934867             | protein_coding CYP4F11   |
|                 | 22500              | 0.6022382165279428   | 3.8107264397063e-46  | 1.81345459333915e-43     |
|                 | 0.7839474088308082 | 2.0190241085498e-66  | 7.45726905624123e-64 |                          |
|                 | 0.1898617436618623 | 3.0313334723856e-07  | 4.25637009235976e-06 |                          |
|                 | 0.2108046450138031 | 9.0316704311705e-08  | 1.08209632717958e-06 |                          |
|                 | 0.3218497642211778 | 7.6172261261086e-17  | 1.04999135832204e-14 |                          |
|                 | 0.3736619629606568 | 7.3231937627389e-22  | 3.88688010179917e-20 |                          |
| ENSG00000172115 | 7                  | 25120091             | 25125361             | protein_coding CYCS 5270 |
|                 | 0.0911903535476668 | 5.36885461184548e-06 | 1.47593763892608e-05 |                          |
|                 | 0.20162078228677   | 1.021879661857e-21   | 1.15612659782645e-20 |                          |

|                 |                      |                      |                      |                           |
|-----------------|----------------------|----------------------|----------------------|---------------------------|
|                 | 0.13449650862739     | 3.25569617416059e-11 | 1.0414885153439e-09  |                           |
|                 | 0.0877691191145029   | 1.16500771476709e-05 | 0.000204349887904461 |                           |
|                 | 0.1647660385741551   | .94339081244473e-15  | 1.84610277238271e-13 |                           |
|                 | 0.0587095950204528   | 0.00301366376930587  | 0.00884511451808895  |                           |
| ENSG00000172366 | 16                   | 636817               | 648474               | protein_coding MCRIP2     |
|                 | 11657                | 0.2235198870748795   | .83321877696112e-09  | 2.2815896391232e-08       |
|                 | 0.5281837468344562   | .14249303503337e-36  | 7.69076013658636e-35 |                           |
|                 | 0.2556489882263593   | .07446915342343e-11  | 9.91659522591793e-10 |                           |
|                 | 0.2369792717964477   | .46542085701058e-10  | 7.13520193443974e-08 |                           |
|                 | 0.2228977604805187   | .38064491103743e-09  | 1.56439547032724e-07 |                           |
|                 | 0.1161458352041660   | .00201537682304005   | 0.0062124170016108   |                           |
| ENSG00000173320 | 4                    | 183797692            | 184023526            | protein_coding STOX2      |
|                 | 225834               | 0.4249355466127238   | .87639156351271e-15  |                           |
|                 | 6.18449481967641e-14 | 0.8020049552120032   | .42474665050086e-41  |                           |
|                 | 1.28486830163785e-39 | 0.2036402259625250   | .000120623579065653  |                           |
|                 | 0.000766907989890936 | 0.3421638109980032   | .46618996800986e-10  |                           |
|                 | 2.724877554016e-08   | 0.2620095400782081   | .0804609865376e-06   |                           |
|                 | 1.27518952342949e-05 | 0.5434732434291462   | .36240011179765e-22  |                           |
|                 | 1.10191111801484e-20 |                      |                      |                           |
| ENSG00000173456 | 11                   | 119334527            | 119337313            | protein_coding RNF26 2786 |
|                 | 0.14618895827917     | 2.63593277701865e-19 | 2.92487156219185e-18 |                           |
|                 | 0.1755943800172814   | .31465491968437e-26  | 6.86598661836188e-25 |                           |
|                 | 0.0644935674364069   | 3.17268628693767e-05 | 0.000241698189067002 |                           |
|                 | 0.0892138416975499   | 1.41920975048985e-08 | 8.63666746206303e-07 |                           |
|                 | 0.12024178963038     | 7.12750188381432e-14 | 5.07029003871887e-12 |                           |
|                 | 0.10873867263764     | 6.56323451531264e-12 | 9.2594522366734e-11  |                           |
| ENSG00000173548 | 15                   | 75647906             | 75662301             | protein_coding SNX33      |
|                 | 14395                | 0.1175954778223542   | .0089960543307e-06   | 5.82182840967595e-06      |
|                 | 0.2527961766842842   | .4075061722533e-22   | 2.85220826293036e-21 |                           |
|                 | 0.1899374675306154   | .96847174777517e-14  | 2.5887565671769e-12  |                           |
|                 | 0.0784584132234309   | 0.00138396454669416  | 0.0092416560964202   |                           |
|                 | 0.0830868133089675   | 0.000754680848302524 | 0.00376109179005279  |                           |
|                 | 0.3036098660519883   | .29254452571034e-30  | 3.01732653917891e-28 |                           |
| ENSG00000173726 | 1                    | 235109336            | 235128936            | protein_coding TOMM20     |
|                 | 19600                | 0.1697742222918219   | .49721757944252e-29  | 2.86184047717863e-27      |
|                 | 0.1752148552409843   | .03554033646804e-30  | 6.62334494423467e-29 |                           |
|                 | 0.0438445416650275   | 0.00175930454663601  | 0.00740877650606566  |                           |
|                 | 0.1242737499244572   | .81411319870221e-17  | 1.21780748673838e-14 |                           |
|                 | 0.0894201022884697   | 5.7656495029594e-10  | 1.61552254688138e-08 |                           |
|                 | 0.0696336845890908   | 8.76378005583651e-07 | 5.68405201872927e-06 |                           |
| ENSG00000173898 | 11                   | 66685248             | 66729226             | protein_coding SPTBN2     |
|                 | 43978                | 0.5314071830500232   | .32455178188107e-40  | 2.62421682680618e-38      |
|                 | 0.64927697877358     | 3.3661425106002e-54  | 4.64080833386199e-52 |                           |
|                 | 0.1548662765841151   | .31868179931387e-05  | 0.000111772272859145 |                           |
|                 | 0.2347235490408369   | .77678895800985e-11  | 1.24846389489209e-08 |                           |
|                 | 0.1464787079284854   | .32705560833178e-05  | 0.000324092304433657 |                           |
|                 | 0.1719566398647211   | .42741125842739e-06  | 8.83848966416544e-06 |                           |
| ENSG00000177156 | 11                   | 747329               | 765024               | protein_coding TALDO1     |
|                 | 17695                | 0.4353627007639232   | .78920526494923e-44  | 4.93784418439136e-42      |
|                 | 0.4721570667319626   | .91960996386354e-50  | 6.82282301436899e-48 |                           |
|                 | 0.0859312903552487   | 0.0015722260415861   | 0.00672904107194229  |                           |
|                 | 0.1014422667632430   | .000211720839064299  | 0.00211571452968744  |                           |
|                 | 0.1989447578821951   | .76270532902162e-12  | 8.8299634472115e-11  |                           |
|                 | 0.1986555829709961   | .21593353245087e-12  | 1.87369223561346e-11 |                           |



|                    |                      |                      |                      |                |            |
|--------------------|----------------------|----------------------|----------------------|----------------|------------|
| ENSG00000177542    | 11                   | 790475               | 798333               | protein_coding | SLC25A22   |
| 7858               | 0.5834920261036875   | .00831416746758e-33  | 2.31526784614176e-31 |                |            |
| 0.3731104897610325 | .62157354270251e-16  | 4.0081690719342e-15  |                      |                |            |
| 0.1812281160570664 | .44129829532881e-05  | 0.000322869744017394 |                      |                |            |
| 0.1745705802880398 | .91123955243604e-05  | 0.00106463344315492  |                      |                |            |
| 0.2316673995770092 | .76662814655121e-07  | 3.85176942762478e-06 |                      |                |            |
| 0.2640758654168534 | .25401005714456e-09  | 4.01899470468496e-08 |                      |                |            |
| ENSG00000178719    | 8                    | 143990058            | 143993415            | protein_coding | GRINA 3357 |
| 0.27409125848124   | 1.52503628911698e-38 | 1.33474945776143e-36 |                      |                |            |
| 0.2524122523132996 | .59095804218809e-34  | 1.96706006397027e-32 |                      |                |            |
| 0.1224845311841671 | .63617704274564e-10  | 4.44076692490144e-09 |                      |                |            |
| 0.0914923689457616 | 1.49912373413088e-06 | 3.71892494490844e-05 |                      |                |            |
| 0.0890730053348321 | 3.09116144119733e-06 | 3.25386514137927e-05 |                      |                |            |
| 0.0883383287594608 | 2.95839637994068e-06 | 1.71653099452871e-05 |                      |                |            |
| ENSG00000178741    | 15                   | 74919791             | 74938168             | protein_coding | COX5A      |
| 18377              | 0.1822250192705655   | .47943604435831e-13  | 3.24331816622561e-12 |                |            |
| 0.3962113573541353 | .45401717951679e-45  | 2.43760816087216e-43 |                      |                |            |
| 0.1641011668371565 | .12939919917311e-11  | 1.56688059066506e-09 |                      |                |            |
| 0.1302965773279931 | .55056782123356e-07  | 6.16232043035655e-06 |                      |                |            |
| 0.13556291532615   | 5.76308445183885e-08 | 9.59221075589716e-07 |                      |                |            |
| 0.2369936919859583 | .34066489046656e-20  | 1.20752246702038e-18 |                      |                |            |
| ENSG00000178772    | 3                    | 194339765            | 194351328            | protein_coding | CPN2       |
| 11563              | 0.36828468398504     | 2.19991705036087e-32 | 9.46754357115248e-31 |                |            |
| 0.5636468364087011 | .08077211124563e-60  | 2.40533553158509e-58 |                      |                |            |
| 0.1470647811089592 | .49196015815349e-07  | 3.29840673779722e-06 |                      |                |            |
| 0.2434261161313031 | .56624162836548e-16  | 6.42117850744891e-14 |                      |                |            |
| 0.2137182378931153 | .2220520935361e-13   | 1.94559494438756e-11 |                      |                |            |
| 0.1974499533431128 | .41691250388357e-12  | 1.1686905516756e-10  |                      |                |            |
| ENSG00000179115    | 19                   | 12922479             | 12934037             | protein_coding | FARSA      |
| 11558              | 0.3615700454148222   | .34178304720121e-35  | 1.44200150562639e-33 |                |            |
| 0.3318195098429716 | .2009424053794e-31   | 1.43543063496888e-29 |                      |                |            |
| 0.1109625020132492 | .52390596587707e-05  | 0.000197686933345394 |                      |                |            |
| 0.1047109699095517 | .41972956858709e-05  | 0.000920318208192821 |                      |                |            |
| 0.0982934841595711 | 0.00020875252933708  | 0.00125082909790091  |                      |                |            |
| 0.0822756625642747 | 0.00170072473280511  | 0.00534400778789247  |                      |                |            |
| ENSG00000181638    | 8                    | 143246821            | 143262705            | protein_coding | ZFP41      |
| 15884              | 0.1369570695377951   | .54650956694567e-06  | 4.55208919042771e-06 |                |            |
| 0.3152132123667731 | .65328841711877e-25  | 2.52515492649934e-24 |                      |                |            |
| 0.1523236638667658 | .81937998561909e-08  | 1.31409651355357e-06 |                      |                |            |
| 0.0902265810176592 | 0.00141097678178837  | 0.00937511701842067  |                      |                |            |
| 0.1382072346435731 | .37374811450672e-06  | 1.58296019792161e-05 |                      |                |            |
| 0.18205306842606   | 2.33662615768989e-10 | 2.65322878357513e-09 |                      |                |            |
| ENSG00000182230    | 5                    | 176060689            | 176132258            | protein_coding | FAM153B    |
| 71569              | 0.7941807047167178   | .15620532709868e-05  | 0.000192377778638714 |                |            |
| 0.8686656940328281 | .64780457270078e-05  | 4.20012229026596e-05 |                      |                |            |
| 0.6655436617249760 | .000883295242107831  | 0.00415610286221622  |                      |                |            |
| 0.75988982929064   | 0.000161085564345846 | 0.00171887123763283  |                      |                |            |
| 0.7836499380890430 | .000109383048088672  | 0.000721761332559689 |                      |                |            |
| 0.8339320888516473 | .33964667422109e-05  | 0.000158429828068484 |                      |                |            |
| ENSG00000182704    | 11                   | 76782251             | 76798154             | protein_coding | TSKU       |
| 15903              | 1.36551005187217     | 6.50427010929192e-54 | 4.40565321881125e-51 |                |            |
| 1.579579063744474  | 9.84648483158955e-66 | 3.19579973315278e-63 |                      |                |            |
| 0.9288488111614481 | .91935733388124e-30  | 7.11944473917518e-28 |                      |                |            |
| 0.9347724698708331 | .64181354389434e-30  | 2.8419792444811e-27  |                      |                |            |

|                 |                      |                      |                      |
|-----------------|----------------------|----------------------|----------------------|
|                 | 1.14421620858614     | 2.42191294655281e-41 | 4.19233131048292e-38 |
|                 | 1.01714075558444     | 4.02250960864761e-35 | 5.46471055368519e-33 |
| ENSG00000184575 | 12                   | 64404350             | 64451127             |
|                 | 46777                | 0.3513274334370822   | 2.20561136179127e-23 |
|                 | 3.67893141384863e-22 |                      |                      |
|                 | 0.6486883873487291   | 1.58055901587645e-59 | 3.28313718777857e-57 |
|                 | 0.1170681828475730   | 0.000392480634706528 | 0.00209255845588398  |
|                 | 0.2321990111547588   | 2.0777472457234e-12  | 1.42076580482347e-09 |
|                 | 0.2577500045138116   | 3.2487806463267e-14  | 4.6478903475902e-12  |
|                 | 0.1875819185131922   | 2.07820361412956e-08 | 1.78480342362318e-07 |
| ENSG00000186529 | 19                   | 15640897             | 15662825             |
|                 | 21928                | 0.2864396606193972   | 5.1817014492106e-05  |
|                 | 6.36756576655173e-05 |                      |                      |
|                 | 1.36880577838346     | 7.76573723119151e-62 | 1.89035031757394e-59 |
|                 | 0.3425000099695534   | 7.79906592206132e-07 | 5.93841525018215e-06 |
|                 | 0.3135100023447014   | 4.23383049859999e-06 | 8.81802745156274e-05 |
|                 | 0.5872971068230051   | 1.19313751189997e-16 | 1.39758566149546e-14 |
|                 | 0.7105396806305753   | 3.6563912253302e-23  | 1.89113138936592e-21 |
| ENSG00000187097 | 14                   | 73958010             | 74019399             |
|                 | 61389                | 0.1532709963124019   | 6.66993445175596e-05 |
|                 | 0.000226078932622184 |                      |                      |
|                 | 0.7019912313510572   | 4.2516191409209e-52  | 2.88409140913288e-50 |
|                 | 0.1538439934563638   | 4.45474585611814e-05 | 0.000562266923876821 |
|                 | 0.2204458528993562   | 9.3272865909605e-08  | 1.51790630498529e-06 |
|                 | 0.2823270765570383   | 3.03136337119093e-12 | 1.40552410594594e-10 |
|                 | 0.4520013872438245   | 5.58802285121512e-27 | 3.99338568803121e-25 |
| ENSG00000196139 | 10                   | 5035354              | 5107686              |
|                 | 72332                | 0.5958239883809914   | 1.18655971402743e-45 |
|                 | 7.95395290058943e-43 |                      |                      |
|                 | 0.8195139646103943   | 3.00037894383736e-70 | 1.37479128135418e-67 |
|                 | 0.2550574809024851   | 2.1291213850684e-11  | 4.16210533167358e-10 |
|                 | 0.3064720278108251   | 1.22175141897397e-15 | 4.42643380376641e-13 |
|                 | 0.4846746995308281   | 1.17806058584176e-32 | 8.34227539401306e-30 |
|                 | 0.4868189772001511   | 1.97313184404464e-33 | 2.36457084602857e-31 |
| ENSG00000197142 | 10                   | 112374018            | 112428380            |
|                 | 54362                | 0.8491774791203515   | 3.39862757707507e-61 |
|                 | 6.00751564451804e-58 |                      |                      |
|                 | 0.7098820183383592   | 5.212932678948e-47   | 2.10049346633866e-45 |
|                 | 0.25240111444915     | 4.70925226046257e-09 | 9.71356322268326e-08 |
|                 | 0.1807766084046792   | 4.40553186492385e-05 | 0.000362785875349939 |
|                 | 0.2414868715224572   | 6.2429226768323e-08  | 4.78733597637437e-07 |
|                 | 0.4390399255826481   | 1.71338904404166e-22 | 8.16296266578747e-21 |
| ENSG00000197170 | 17                   | 67337916             | 67366627             |
|                 | 28711                | 0.2948439481047231   | 1.76547891589409e-43 |
|                 | 2.80657102354225e-41 |                      |                      |
|                 | 0.2254515785172081   | 1.08189675712966e-28 | 2.09637681334864e-27 |
|                 | 0.1333463207558893   | 3.30683034213824e-12 | 1.29439974623547e-10 |
|                 | 0.0604722033568885   | 0.00124910004238757  | 0.00856879328945661  |
|                 | 0.0808904227659122   | 1.92043610515325e-05 | 0.00015931029862717  |
|                 | 0.1485586198171841   | 1.38251811060892e-14 | 2.74822377173661e-13 |
| ENSG00000197408 | 19                   | 40991299             | 41018398             |
|                 | 27099                | 2.29414113064664     | 7.48169075878743e-48 |
|                 | 2.04486421633595e-45 |                      |                      |
|                 | 3.90871301803141     | 2.08115329023983e-95 | 6.48445742172925e-92 |
|                 | 1.21672569279485     | 1.0111837350595e-17  | 9.72421691882222e-16 |
|                 | 2.50343640036369     | 3.38453185291621e-54 | 5.27276217365816e-50 |
|                 | 3.09698734047051     | 1.26457935067319e-71 | 1.97008817041376e-67 |
|                 | 2.75500068541132     | 2.6005937193023e-62  | 1.76150650230481e-59 |
| ENSG00000198146 | 15                   | 34978341             | 34988287             |
|                 | 9946                 | 0.2305476918613218   | 2.29690593466e-20    |
|                 | 9.69673650083032e-19 |                      |                      |
|                 | 0.4548146040612031   | 1.03978520130831e-56 | 1.66998078878166e-54 |



|                 |                      |                      |                      |                      |            |
|-----------------|----------------------|----------------------|----------------------|----------------------|------------|
|                 | 0.1968712969595462   | .22603219070192e-15  |                      | 1.45101905853327e-13 |            |
|                 | 0.1291698843425741   | .1307442180487e-07   |                      | 4.71012411042265e-06 |            |
|                 | 0.2270881794737563   | .59874267559184e-19  |                      | 6.22942357144948e-17 |            |
|                 | 0.1871851989837063   | .83958472117489e-14  |                      | 7.28585753607596e-13 |            |
| ENSG00000198431 | 12                   | 104215779            | 104350305            | protein_coding       | TXNRD1     |
|                 | 134526               | 0.8908540192888333   | .69208393971002e-57  |                      |            |
|                 | 2.87594878483712e-54 | 0.7309259434033356   | .21802641653825e-43  |                      |            |
|                 | 3.69735242531486e-41 | 0.2133904648046255   | .17850202419142e-06  |                      |            |
|                 | 4.91728931734545e-05 | 0.2154135234158124   | .68494913693704e-06  |                      |            |
|                 | 9.66391596685147e-05 | 0.42403514028522     | 6.19249819682266e-18 |                      |            |
|                 | 8.93267864891669e-16 | 0.5437279680151622   | .26648962040537e-27  |                      |            |
|                 | 1.66554914133468e-25 |                      |                      |                      |            |
| ENSG00000198682 | 10                   | 87659613             | 87747705             | protein_coding       | PAPSS2     |
|                 | 88092                | 0.4099383542773031   | .52503355595053e-33  | 7.42453055254792e-32 |            |
|                 | 0.3332889626804134   | .40525127813312e-24  | 6.02012365456456e-23 |                      |            |
|                 | 0.1316089071548761   | .98322897539575e-05  | 0.000159755554331388 |                      |            |
|                 | 0.1043795216997760   | .000715112396782219  | 0.00553989857258587  |                      |            |
|                 | 0.1652621505957141   | .368070603346e-07    | 2.0572559777536e-06  |                      |            |
|                 | 0.1297014527450852   | .57446746261962e-05  | 0.000124519182242009 |                      |            |
| ENSG00000211452 | 1                    | 53891239             | 53911086             | protein_coding       | DIO1       |
|                 | 19847                | 0.4019964418944499   | .08809918344117e-09  | 3.47785549444436e-08 |            |
|                 | 1.56532366496626     | 1.02742490413811e-72 | 5.51939744191985e-70 |                      |            |
|                 | 0.3413265351430588   | .11618936612798e-07  | 9.56445643985686e-06 |                      |            |
|                 | 0.6114146681071711   | .7633743549515e-17   | 7.84903116451128e-15 |                      |            |
|                 | 0.6415664814019428   | .91393106828235e-19  | 1.4465638761747e-16  |                      |            |
|                 | 1.45941649027362     | 8.93512327990933e-67 | 7.32633081987934e-64 |                      |            |
| ENSG00000214160 | 3                    | 184242301            | 184249548            | protein_coding       | ALG3 7247  |
|                 | 0.3741145902440854   | .89846973063024e-35  | 2.9464579124899e-33  |                      |            |
|                 | 0.4649007947979071   | .11690572293542e-48  | 1.02960202707757e-46 |                      |            |
|                 | 0.0880748614677040   | .00124323405066479   | 0.00554172912025944  |                      |            |
|                 | 0.1503020464774986   | .15566955730161e-08  | 2.77968626183193e-06 |                      |            |
|                 | 0.1687775602444411   | .70556348227893e-09  | 4.26500377053345e-08 |                      |            |
|                 | 0.1199314205683441   | .25411853423805e-05  | 6.4439025873663e-05  |                      |            |
| ENSG00000226900 | 10                   | 132511626            | 132518191            | lincRNA              | 6565       |
|                 | 0.6877863085138276   | .15199153128741e-05  | 0.00014753983384533  |                      |            |
|                 | 1.15731800728465     | 3.36787858349572e-11 | 1.55691930125459e-10 |                      |            |
|                 | 0.6501167471681050   | .000141870767091679  | 0.000875488312058317 |                      |            |
|                 | 0.7077142143698      | 3.80002594661956e-05 | 0.000528576823414162 |                      |            |
|                 | 0.66935847938232     | 0.000103758085473514 | 0.000690199493420957 |                      |            |
|                 | 1.7053082522426      | 1.8398689963364e-21  | 7.74684299835803e-20 |                      |            |
| ENSG00000229425 | 21                   | 15370500             | 15627342             | lincRNA              | 256842     |
|                 | 1.03534604089525     | 4.73079237807619e-13 | 2.82163148767416e-12 |                      |            |
|                 | 2.53625316403221     | 1.58376191081722e-54 | 2.26361713840564e-52 |                      |            |
|                 | 0.7408125499715551   | .35944524031814e-07  | 1.92359649399785e-06 |                      |            |
|                 | 0.8818242169055275   | .42782788385433e-10  | 5.45549229693978e-08 |                      |            |
|                 | 1.04236653157913     | 4.40892317073452e-13 | 2.5534057277648e-11  |                      |            |
|                 | 2.41086570701035     | 6.35009490368132e-51 | 2.19840285565447e-48 |                      |            |
| ENSG00000230438 | 6                    | 2854657              | 2881407              | lincRNA              | SERPINB9P1 |
|                 | 26750                | 1.73110949607723     | 2.44366351740743e-37 | 1.81284923512811e-35 |            |
|                 | 3.27753574242468     | 3.78227914504735e-90 | 6.54712520007697e-87 |                      |            |
|                 | 1.18060502350421     | 2.85593067456365e-20 | 3.86891686774149e-18 |                      |            |
|                 | 1.35638131031666     | 2.71156602226803e-25 | 3.52029058840947e-22 |                      |            |
|                 | 1.84332554771494     | 6.81393109170705e-41 | 9.65038477070037e-38 |                      |            |
|                 | 3.27773438066833     | 1.41667220877308e-90 | 1.10351681702379e-86 |                      |            |

|                 |    |                      |                      |                      |                      |
|-----------------|----|----------------------|----------------------|----------------------|----------------------|
| ENSG00000231683 | 6  | 53561289             | 53617171             | lincRNA              | 55882                |
|                 |    | 0.7126729067172381   | 1.48103153299795e-20 | 1.84731707386509e-19 |                      |
|                 |    | 0.8822000503484433   | 3.937692590105e-29   | 7.84466916384218e-28 |                      |
|                 |    | 0.33507937417671     | 4.44240819712492e-06 | 4.29598245208003e-05 |                      |
|                 |    | 0.2937547447314335   | 5.86355067086537e-05 | 0.000759968851093274 |                      |
|                 |    | 0.3201579622261921   | 1.34612867183537e-05 | 0.000115927797559553 |                      |
|                 |    | 0.2487730651143180   | 0.000614706430415358 | 0.00215489796517086  |                      |
| ENSG00000240224 | 2  | 233712992            | 233773299            | protein_coding       | UGT1A5               |
|                 |    | 60307                | 3.94540960228678     | 6.92941920064429e-48 | 1.92773967369353e-45 |
|                 |    | 5.44309306201796     | 2.43178638237377e-74 | 1.51539200204004e-71 |                      |
|                 |    | 1.83462237711554     | 3.39090257777048e-14 | 1.82161625031332e-12 |                      |
|                 |    | 2.23883869238161     | 1.25539966514219e-19 | 7.82314855330007e-17 |                      |
|                 |    | 3.19031591536374     | 1.61646067905709e-34 | 1.39904671772391e-31 |                      |
|                 |    | 4.63626866154666     | 1.6835623059576e-60  | 1.04912868658054e-57 |                      |
| ENSG00000241119 | 2  | 233671853            | 233773300            | protein_coding       | UGT1A9               |
|                 |    | 101447               | 0.2392463490619623   | 3.90510247901678e-05 |                      |
|                 |    | 9.61555105430731e-05 | 0.68213421269401     | 9.96475320847336e-28 |                      |
|                 |    | 1.80933438502105e-26 | 0.3283743170041321   | 1.95228966871791e-08 |                      |
|                 |    | 3.45621826692686e-07 | 0.2942558218285594   | 9.033033933428e-07   |                      |
|                 |    | 1.52761421654402e-05 | 0.4852595294953339   | 9.46546537532352e-16 |                      |
|                 |    | 9.51370871497839e-14 | 0.2162119888252730   | 0.00018265507708464  |                      |
|                 |    | 0.000723698740056358 |                      |                      |                      |
| ENSG00000241635 | 2  | 233760248            | 233773299            | protein_coding       | UGT1A1               |
|                 |    | 13051                | 1.70947661572156     | 1.70394604274946e-81 | 5.30915507999878e-78 |
|                 |    | 1.52116752174572     | 2.72987790950198e-70 | 1.28875054400398e-67 |                      |
|                 |    | 0.6344873586635816   | 7.7633298413398e-19  | 7.81988826369061e-17 |                      |
|                 |    | 0.7549644582513766   | 6.50548243159405e-25 | 7.79607006167721e-22 |                      |
|                 |    | 1.12907785785035     | 3.44707370257935e-46 | 6.71274515156047e-43 |                      |
|                 |    | 1.31316081670995     | 3.74110954007871e-58 | 2.00974984568573e-55 |                      |
| ENSG00000242372 | 20 | 35278907             | 35284985             | protein_coding       | EIF6 6078            |
|                 |    | 0.2376488829738824   | 4.7145896025376e-22  | 6.47405754105886e-21 |                      |
|                 |    | 0.2751142954060435   | 5.25132546302002e-28 | 9.69317528298446e-27 |                      |
|                 |    | 0.0698358963087378   | 0.00248488081448802  | 0.00989063827514277  |                      |
|                 |    | 0.0741678210072703   | 0.00139544802101603  | 0.00929841091505937  |                      |
|                 |    | 0.1404272576298283   | 2.1725445568608e-09  | 7.45857249481152e-08 |                      |
|                 |    | 0.1072119364765544   | 1.13843481858657e-06 | 2.33427501950616e-05 |                      |
| ENSG00000243135 | 2  | 233729108            | 233773299            | protein_coding       | UGT1A3               |
|                 |    | 44191                | 1.05683223189944     | 3.99660366174761e-32 | 1.68278617422611e-30 |
|                 |    | 1.05247945052235     | 5.58049974338068e-32 | 1.40223557261496e-30 |                      |
|                 |    | 0.4770715868472589   | 5.0740086008772e-09  | 1.81757866239988e-07 |                      |
|                 |    | 0.4007858372216741   | 1.39454829082335e-06 | 3.49049709815658e-05 |                      |
|                 |    | 0.89334915008461     | 2.57666202470758e-24 | 8.54081227296158e-22 |                      |
|                 |    | 1.58048826901815     | 4.74977147865697e-59 | 2.74061814318507e-56 |                      |
| ENSG00000244474 | 2  | 233718778            | 233773299            | protein_coding       | UGT1A4               |
|                 |    | 54521                | 1.8558642774927      | 2.58477606762815e-65 | 4.47424737306433e-62 |
|                 |    | 2.47944187259668     | 8.36406158602257e-94 | 1.86148164926637e-90 |                      |
|                 |    | 1.11894224355239     | 3.47755774767368e-31 | 1.50491311530578e-28 |                      |
|                 |    | 1.19973435224781     | 1.50111256787408e-34 | 2.92322908686378e-31 |                      |
|                 |    | 1.71814709656505     | 2.09131777508233e-58 | 1.08602132060025e-54 |                      |
|                 |    | 2.38500777534571     | 3.58185174718972e-90 | 1.86005561231562e-86 |                      |
| ENSG00000248709 | 5  | 115755644            | 115756286            | lincRNA              | 642                  |
|                 |    | 0.26066028900259     | 0.0029691365106434   | 0.00556097351518556  |                      |
|                 |    | 1.49359702979978     | 1.19847581168851e-50 | 1.22835885988785e-48 |                      |
|                 |    | 0.566847633383174    | 1.13505005810574e-10 | 3.19763921432718e-09 |                      |

|                 |                    |                      |                      |                          |
|-----------------|--------------------|----------------------|----------------------|--------------------------|
|                 | 0.745591077935554  | 1.33192997362446e-16 | 5.60814515110687e-14 |                          |
|                 | 1.15621020667176   | 6.29529582494827e-34 | 4.90372068284346e-31 |                          |
|                 | 1.64167914300439   | 3.6862074919343e-58  | 2.00974984568573e-55 |                          |
| ENSG00000250799 | 19                 | 35799988             | 35813299             | protein_coding PRODH2    |
|                 | 13311              | 0.2998735229075771   | 1.39160203768839e-06 | 4.11536980735525e-06     |
|                 | 1.52292225174423   | 6.62603317147717e-81 | 6.45168567365268e-78 |                          |
|                 | 0.3132257228512324 | 2.3013804221768e-07  | 5.3404635785826e-06  |                          |
|                 | 0.44430438847195   | 2.1232200338724e-12  | 4.08365986514792e-10 |                          |
|                 | 0.49687658431022   | 8.45469720932678e-15 | 7.00615573532457e-13 |                          |
|                 | 1.38799149493334   | 2.03356972580089e-72 | 2.4369986737117e-69  |                          |
| ENSG00000254986 | 11                 | 66480013             | 66509657             | protein_coding DPP3      |
|                 | 29644              | 0.16292685768545     | 1.5694129192442e-19  | 1.78206150647998e-18     |
|                 | 0.1032027918546133 | 2.1340574202817e-09  | 1.21538354103076e-08 |                          |
|                 | 0.0910500771120182 | 1.36121979756767e-07 | 1.92435963941078e-06 |                          |
|                 | 0.0572987573819335 | 0.000840673462275194 | 0.00628146372603609  |                          |
|                 | 0.0890824436727113 | 3.13264565038584e-07 | 4.28476616219148e-06 |                          |
|                 | 0.0862224520995847 | 5.81943120648256e-07 | 3.90443233272144e-06 |                          |
| ENSG00000255974 | 19                 | 40843538             | 40850447             | protein_coding CYP2A6    |
|                 | 6909               | 0.9848765152898071   | 1.61787390516199e-15 | 1.22116557987009e-14     |
|                 | 2.71177055619925   | 2.35308876311561e-72 | 1.22195899468593e-69 |                          |
|                 | 0.6959621266477927 | 5.4197096388446e-09  | 1.47608499555724e-07 |                          |
|                 | 1.65672419064274   | 5.70075351548702e-36 | 1.48020065029621e-32 |                          |
|                 | 1.97355247134412   | 1.88699706049433e-46 | 4.19964674363446e-43 |                          |
|                 | 1.43163110905536   | 7.93659105377647e-29 | 6.71979087102085e-27 |                          |
| ENSG00000278619 | 17                 | 36601572             | 36608971             | protein_coding MRM1 7399 |
|                 | 0.41764387198833   | 1.84896639175057e-11 | 9.32503963000391e-11 |                          |
|                 | 0.5946839639616981 | 1.30741828442916e-20 | 1.34978591471981e-19 |                          |
|                 | 0.2143841979469170 | 0.000401815529908286 | 0.00213356651003449  |                          |
|                 | 0.2256624486027750 | 0.00021186455124634  | 0.00211579348965816  |                          |
|                 | 0.1942451805493190 | 0.00145716567380743  | 0.00659992243557029  |                          |
|                 | 0.2951664801772621 | 1.33013339714145e-06 | 8.31880698276459e-06 |                          |

| Gene.stable.ID  | Chromosome.scaffold.name | Gene.start..bp. | Gene.end..bp. | Gene.type      | HGNC.symbol | length | Omeprazole-Baseline_lfc | Omeprazole-Baseline_p | Omeprazole-Baseline_FDR                  |
|-----------------|--------------------------|-----------------|---------------|----------------|-------------|--------|-------------------------|-----------------------|------------------------------------------|
| ENSG00000003756 | 3                        | 50088908        | 50119021      | protein_coding | RBM5        |        |                         |                       |                                          |
|                 |                          |                 | 30113         |                |             |        | -0.176621976256151      |                       | 1.08955300407604e-32                     |
|                 |                          |                 |               |                |             |        | 4.83593910270675e-31    |                       | -0.165148252950232.11888683449862e-29    |
|                 |                          |                 |               |                |             |        | 4.32069869039973e-28    |                       | -0.1342128348839 3.64690399903025e-21    |
|                 |                          |                 |               |                |             |        | 5.85722859803013e-19    |                       | -0.0999301801626045 6.70441440634025e-13 |
|                 |                          |                 |               |                |             |        | 1.51916705057693e-10    |                       | -0.118011400072821 7.49064721224776e-17  |
|                 |                          |                 |               |                |             |        | 9.11693694684436e-15    |                       | -0.0488514815673469 0.000290027531811295 |
|                 |                          |                 |               |                |             |        | 0.00109908511751111     |                       |                                          |
| ENSG00000006607 | 2                        | 241356243       | 241494841     | protein_coding | FARP2       |        |                         |                       |                                          |
|                 |                          |                 | 138598        |                |             |        | -0.247550821922885      |                       | 8.65634314201957e-22                     |
|                 |                          |                 |               |                |             |        | 1.22153233523119e-20    |                       | -0.339091361395812 4.5515009854804e-36   |
|                 |                          |                 |               |                |             |        | 1.59702328497295e-34    |                       | -0.117389281850598 1.58933211746808e-06  |
|                 |                          |                 |               |                |             |        | 1.73269454569876e-05    |                       | -0.128140428072591.99100782885288e-07    |
|                 |                          |                 |               |                |             |        | 7.40284271257735e-06    |                       | -0.0885138926748397 0.000304720638981036 |
|                 |                          |                 |               |                |             |        | 0.00173193828335847     |                       | -0.0779983370677098 0.00130320976807586  |
|                 |                          |                 |               |                |             |        | 0.00420955939806216     |                       |                                          |
| ENSG00000013288 | 4                        | 6575175         | 6623362       | protein_coding | MAN2B2      |        |                         |                       |                                          |
|                 |                          |                 | 48187         |                |             |        | -0.355679347427894      |                       | 7.32358842974493e-36                     |
|                 |                          |                 |               |                |             |        | 4.75392433945817e-34    |                       | -0.362963723955031 4.97622939044261e-37  |
|                 |                          |                 |               |                |             |        | 1.88624519887361e-35    |                       | -0.081091651010551 0.00147874211558574   |
|                 |                          |                 |               |                |             |        | 0.0063992565051973      |                       | -0.107291866962999 3.11172741313421e-05  |
|                 |                          |                 |               |                |             |        | 0.000447623281340885    |                       | -0.181279178008643 6.87632898381762e-12  |
|                 |                          |                 |               |                |             |        | 2.96748834456772e-10    |                       | -0.162747373420058 4.10428571544013e-10  |
|                 |                          |                 |               |                |             |        | 4.49653074267523e-09    |                       |                                          |
| ENSG00000014914 | 1                        | 149928651       | 149936869     | protein_coding | MTMR11      |        |                         |                       |                                          |
|                 |                          |                 | 8218          |                |             |        | -0.461633190381831      |                       | 7.64247751310412e-23                     |
|                 |                          |                 |               |                |             |        | 1.20022335863557e-21    |                       | -0.667261709691127 6.534507492029e-41    |
|                 |                          |                 |               |                |             |        | 3.28390620059096e-39    |                       | -0.210903392084765 1.89996266411091e-06  |
|                 |                          |                 |               |                |             |        | 2.04134609270234e-05    |                       | -0.211599787560336 1.95491796298852e-06  |
|                 |                          |                 |               |                |             |        | 4.6214972603032e-05     |                       | -0.309789594114379 9.151539316014e-12    |
|                 |                          |                 |               |                |             |        | 3.82230109930783e-10    |                       | -0.684283333304657 1.22980332339679e-42  |
|                 |                          |                 |               |                |             |        | 2.69846563030966e-40    |                       |                                          |
| ENSG00000017427 | 12                       | 102395867       | 102480645     | protein_coding | IGF1        |        |                         |                       |                                          |
|                 |                          |                 | 84778         |                |             |        | -0.611473416465603      |                       | 9.07779034513153e-21                     |
|                 |                          |                 |               |                |             |        | 1.16015501055623e-19    |                       | -0.893639049224858 5.06634257268343e-38  |
|                 |                          |                 |               |                |             |        | 2.07706712999566e-36    |                       | -0.610414691612356 7.02315853811858e-21  |
|                 |                          |                 |               |                |             |        | 1.04203606538428e-18    |                       | -0.233690636449571 0.000164497144860407  |
|                 |                          |                 |               |                |             |        | 0.00174452077588855     |                       | -0.304818339616562 1.17938028452511e-06  |
|                 |                          |                 |               |                |             |        | 1.38147108666291e-05    |                       | -0.585856072885847 1.7234592227965e-19   |
|                 |                          |                 |               |                |             |        | 5.79908665916774e-18    |                       |                                          |
| ENSG00000032219 | 14                       | 58298385        | 58373887      | protein_coding | ARID4A      |        |                         |                       |                                          |
|                 |                          |                 | 75502         |                |             |        | -0.437517795965347      |                       | 2.79052045371823e-33                     |
|                 |                          |                 |               |                |             |        | 1.31737933783262e-31    |                       | -0.357933945328033 3.39276708868549e-24  |
|                 |                          |                 |               |                |             |        | 4.70248385005617e-23    |                       | -0.165284994733618 6.53052925854431e-07  |

|                 |                      |                      |                      |                        |
|-----------------|----------------------|----------------------|----------------------|------------------------|
|                 | 7.85024037954181e-06 | -0.171085981780458   | 3.05236309944271e-07 |                        |
|                 | 1.03151333462512e-05 | -0.221244659276397   | .20314050573567e-11  |                        |
|                 | 2.45553010807125e-09 | -0.172464673842258   | 2.23164050392761e-07 |                        |
|                 | 1.60957071345779e-06 |                      |                      |                        |
| ENSG00000043143 | 5                    | 134524312            | 134583230            | protein_coding JADE2   |
|                 | 58918                | -0.451184480093629   | 2.00151167726181e-28 |                        |
|                 | 5.81745343657868e-27 | -0.411323595761521   | 1.46013019058409e-24 |                        |
|                 | 2.0869145173495e-23  | -0.119664886752980   | 0.00138047887444537  |                        |
|                 | 0.00602929082842288  | -0.185416818249161   | 1.0386600055627e-06  |                        |
|                 | 2.79953014302099e-05 | -0.160404193277409   | 2.38293304903652e-05 |                        |
|                 | 0.000191853818971266 | -0.145121346157587   | 0.000112917177292259 |                        |
|                 | 0.000470609070368138 |                      |                      |                        |
| ENSG00000044012 | 1                    | 42153421             | 42155824             | protein_coding GUCA2B  |
|                 | 2403                 | -0.947073787605651   | 5.71908075204316e-27 |                        |
|                 | 1.43013738420675e-25 | -1.337431540570229   | 2.8198190184822e-46  |                        |
|                 | 6.88590457375683e-44 | -0.735767425891555   | 5.01693664018162e-18 |                        |
|                 | 5.21059039449263e-16 | -0.306803077973274   | 0.000169246064630035 |                        |
|                 | 0.00177913929883355  | -0.590630287361897   | 2.18671514543365e-12 |                        |
|                 | 1.06792586992824e-10 | -0.826661967050881   | 9.08817907193572e-22 |                        |
|                 | 4.02502300525873e-20 |                      |                      |                        |
| ENSG00000049768 | X                    | 49250436             | 49264826             | protein_coding FOXP3   |
|                 | 14390                | -1.565201679023422   | 4.1832711762747e-12  | 1.33979794329724e-11   |
|                 |                      | -2.847144657915732   | 0.4756872083937e-32  | 5.37021432692871e-31   |
|                 |                      |                      |                      | -                      |
|                 | 0.8823216939094344   | 5.0407603812867e-05  | 0.000326975771658931 | -                      |
|                 | 1.0769995410366      | 8.59580790237613e-07 | 2.39989410951824e-05 | -                      |
|                 | 1.89896652389897     | 8.86900167769662e-17 | 1.05473417661707e-14 | -                      |
|                 | 2.57336679843601     | 1.11902285066051e-27 | 8.58781132533991e-26 |                        |
| ENSG00000054793 | 20                   | 51596514             | 51768634             | protein_coding ATP9A   |
|                 | 172120               | -0.357215088539026   | 3.09333339034241e-25 |                        |
|                 | 6.34928074942613e-24 | -0.451582583498155   | 1.2765404779409e-36  |                        |
|                 | 4.69038304383049e-35 | -0.138374827574648   | 1.68621375584094e-05 |                        |
|                 | 0.000138042691025991 | -0.109848210619396   | 0.000635068496778412 |                        |
|                 | 0.00503241714715711  | -0.129299147373807   | 6.5888513044756e-05  |                        |
|                 | 0.000464890011197579 | -0.309496979575772   | 4.17403157941149e-20 |                        |
|                 | 1.49832345566018e-18 |                      |                      |                        |
| ENSG00000054965 | 11                   | 73400487             | 73598189             | protein_coding FAM168A |
|                 | 197702               | -0.260578600399621   | 4.22411024181453e-29 |                        |
|                 | 1.32944269610563e-27 | -0.163927549770112   | 1.25348411393952e-13 |                        |
|                 | 7.32209561719678e-13 | -0.128054811324166   | 3.70309552084345e-09 |                        |
|                 | 7.79601690800271e-08 | -0.0756271334717891  | 0.00043038211325277  |                        |
|                 | 0.00371875925810588  | -0.089809530740272   | 3.35927898435413e-05 |                        |
|                 | 0.000260498791922613 | -0.112478491570437   | 1.93789855733639e-07 |                        |
|                 | 1.41554284457117e-06 |                      |                      |                        |
| ENSG00000058091 | 7                    | 90466424             | 91210590             | protein_coding CDK14   |
|                 | 744166               | -0.415783230753547   | 4.1147763278561e-39  |                        |
|                 | 6.87282202625994e-37 | -0.382219324204385   | 3.69315482995281e-34 |                        |
|                 | 1.11719726399679e-32 | -0.150849052165004   | 1.38702445334986e-07 |                        |
|                 | 1.95198319410456e-06 | -0.126588568295718   | 9.67449552910611e-06 |                        |
|                 | 0.00017794446971422  | -0.161832136032376   | 2.34744576758546e-08 |                        |
|                 | 4.34333225810142e-07 | -0.110829074635287   | 9.55776414874334e-05 |                        |
|                 | 0.000405391798729302 |                      |                      |                        |
| ENSG00000065485 | 3                    | 123067062            | 123225227            | protein_coding PDIA5   |
|                 | 158165               | -0.185371922333923   | 1.37321397812072e-12 |                        |
|                 | 7.81347719691112e-12 | -0.476032075380993   | 6.94363280758891e-56 |                        |

|                      |                        |                       |
|----------------------|------------------------|-----------------------|
| 1.05024131562551e-53 | -0.202996553804796     | 9.61616369680965e-15  |
| 5.67462932699233e-13 | -0.141864452146437     | 3.788121354123e-08    |
| 1.8794631393593e-06  | -0.183642201715619     | 2.64558230224849e-12  |
| 1.24497581817401e-10 | -0.100586970202125     | 7.61298485823642e-05  |
| 0.000330645918891734 |                        |                       |
| ENSG00000067113      | 5 55424854 55535050    | protein_coding PLPP1  |
| 110196               | -0.424313226331522     | 3.38846428698135e-34  |
| 1.26996194972295e-32 | -0.479778201441103     | 1.6232776020851e-41   |
| 8.69039235837933e-40 | -0.222114944077054     | 6.60807786505264e-12  |
| 1.72986132673868e-10 | -0.228084530805381     | 1.66748943871299e-12  |
| 3.28833138806452e-10 | -0.281843590952361     | 3.31516682549156e-17  |
| 1.75119521148145e-15 | -0.272830043809482     | 6.33009830887843e-17  |
| 1.61138237833361e-15 |                        |                       |
| ENSG00000068383      | 10 132537820 132783480 | protein_coding INPP5A |
| 245660               | -0.199679778723702     | 3.13133313436173e-22  |
| 4.62837181216521e-21 | -0.261560433037162     | 6.3278745363318e-34   |
| 8.02665278672238e-33 | -0.0955344133789762    | 9.63802660420214e-07  |
| 1.1092999517812e-05  | -0.0794079527495573    | 4.61998613929834e-05  |
| 0.000622619066298692 | -0.0649250234730365    | 0.000871253224025203  |
| 0.00425227254921323  | -0.118994909071626     | 1.51240735550184e-09  |
| 1.53898067873045e-08 |                        |                       |
| ENSG00000069869      | 15 55826922 55993746   | protein_coding NEDD4  |
| 166824               | -0.259608523665332     | 3.98927673526692e-23  |
| 6.4603890081833e-22  | -0.283227008700478     | 1.23122957746964e-26  |
| 2.04273967916927e-25 | -0.0812296848746756    | 0.000933782002705983  |
| 0.00435942158230642  | -0.0830760502451504    | 0.000756930242305932  |
| 0.00576354655175176  | -0.126959806438608     | 3.94489582554336e-07  |
| 5.21710798524109e-06 | -0.152614403572176     | 1.02012972316719e-09  |
| 1.06233963617792e-08 |                        |                       |
| ENSG00000070614      | 5 150485818 150558211  | protein_coding NDST1  |
| 72393                | -0.298735362896906     | 3.24154746092982e-28  |
| 9.3001966655296e-27  | -0.381133254943602     | 2.96316767941999e-41  |
| 1.54910031133168e-39 | -0.144688588347323     | 1.1583254986881e-08   |
| 2.17482481817131e-07 | -0.123256979926804     | 1.13264612179481e-06  |
| 2.99583937715473e-05 | -0.221062868200788     | 4.20413938275512e-17  |
| 5.32490141820667e-15 | -0.173815763870859     | 1.10249261887104e-11  |
| 1.50371554867263e-10 |                        |                       |
| ENSG00000070759      | 1 45343883 45491166    | protein_coding TESK2  |
| 147283               | -0.385719404925291     | 1.44151992004396e-23  |
| 2.43573089309813e-22 | -0.2888791506808       | 1.03942669115102e-14  |
| 6.63995120936496e-14 | -0.112157889207893     | 0.00177183376315682   |
| 0.00745030990451284  | -0.121766375020366     | 0.000741441715751924  |
| 0.00568171199690075  | -0.155252106809144     | 2.0260122056993e-05   |
| 0.000166796566629187 | -0.163371589269366     | 6.48194945505763e-06  |
| 3.52714951311012e-05 |                        |                       |
| ENSG00000077684      | 4 128809623 128875224  | protein_coding JADE1  |
| 65601                | -0.388773571770621     | 1.95054573490246e-24  |
| 3.70128526236851e-23 | -0.502389979858447     | 9.43509596998629e-37  |
| 3.50809928678798e-35 | -0.165551405257298     | 3.64825906617084e-06  |
| 3.6155361317987e-05  | -0.181436273370351     | 4.7202939661033e-07   |
| 1.48798273867612e-05 | -0.268177520453255     | 3.58375448108344e-13  |
| 2.15564907570652e-11 | -0.267089484903527     | 2.93257164004643e-13  |
| 4.98761283627547e-12 |                        |                       |



|                      |                       |           |                      |                |           |
|----------------------|-----------------------|-----------|----------------------|----------------|-----------|
| ENSG00000078699      | 20                    | 33490075  | 33650036             | protein_coding | CBFA2T2   |
| 159961               | -0.251145826674155    |           | 5.2971133630934e-23  |                |           |
| 8.48136989554287e-22 | -0.125717100346924    |           | 1.95790121388171e-07 |                |           |
| 6.27616111338749e-07 | -0.152141661548313    |           | 3.67945101710216e-10 |                |           |
| 9.38169679139681e-09 | -0.0928502092913579   |           | 0.000107646227034762 |                |           |
| 0.00124315831799448  | -0.112908720629629    |           | 3.06878845277619e-06 |                |           |
| 3.23468574464143e-05 | -0.111944736109624    |           | 3.09584285516173e-06 |                |           |
| 1.79094451691662e-05 |                       |           |                      |                |           |
| ENSG00000079557      | 4                     | 73481683  | 73504001             | protein_coding | AFM       |
| 22318                | -0.616633875295452    |           | 2.7441170908503e-15  |                |           |
| 2.01368818456698e-14 | -0.630197610563645    |           | 7.62462951272609e-16 |                |           |
| 5.38215238689442e-15 | -0.370373872582704    |           | 9.63081723265731e-07 |                |           |
| 1.1092999517812e-05  | -0.251811266959638    |           | 0.000826516255458988 |                |           |
| 0.0061935049272706   | -0.362557797596665    |           | 2.00746587938766e-06 |                |           |
| 2.22118685617758e-05 | -0.449639060362491    |           | 3.54041894528532e-09 |                |           |
| 3.38797215900491e-08 |                       |           |                      |                |           |
| ENSG00000079950      | 6                     | 132445867 | 132513198            | protein_coding | STX7      |
| 67331                | -0.233994856252294    |           | 2.98691214040175e-32 |                |           |
| 1.27838198448678e-30 | -0.353566792017993    |           | 1.45124844520056e-59 |                |           |
| 3.09712322298351e-57 | -0.076834016844165    |           | 2.09973993610223e-05 |                |           |
| 0.000168357429050626 | -0.111817683182964    |           | 1.1907254434785e-09  |                |           |
| 1.03633026167327e-07 | -0.094018288326474    |           | 2.91688103320465e-07 |                |           |
| 4.02498579418027e-06 | -0.125981361875278    |           | 3.6506574775814e-12  |                |           |
| 1.16252773670227e-10 |                       |           |                      |                |           |
| ENSG00000081051      | 4                     | 73431138  | 73456174             | protein_coding | AFP       |
| 25036                | -0.290328262403309    |           | 2.6454093908833e-06  |                |           |
| 7.55228750239526e-06 | -0.583732623797531    |           | 1.56819122723628e-19 |                |           |
| 1.47797042523376e-18 | -0.287205338634983    |           | 3.00704407606664e-06 |                |           |
| 3.06588610347134e-05 | -0.235694619533433    |           | 0.000126906483986135 |                |           |
| 0.00141522985971367  | -0.263862740345385    |           | 2.01912830934947e-05 |                |           |
| 0.000166345848394264 | -0.226147273028152    |           | 0.000220481383524065 |                |           |
| 0.000857219733945946 |                       |           |                      |                |           |
| ENSG00000081059      | 5                     | 134114711 | 134151865            | protein_coding | TCF7      |
| 37154                | -0.378638543478761    |           | 9.04105900722953e-18 |                |           |
| 8.43417115410951e-17 | -0.408569166966595    |           | 3.44136463956501e-20 |                |           |
| 3.42137968856307e-19 | -0.138035682817633    |           | 0.000988343279461632 |                |           |
| 0.00456760603700171  | -0.145444752769401    |           | 0.000557414815987068 |                |           |
| 0.00454186901271001  | -0.251436954526482    |           | 4.98708725840662e-09 |                |           |
| 1.09892266476261e-07 | -0.291058108345332    |           | 1.38783051690357e-11 |                |           |
| 1.87357119781982e-10 |                       |           |                      |                |           |
| ENSG00000088854      | 20                    | 3249305   | 3407625              | protein_coding | C20orf194 |
| 158320               | -0.285647411688018    |           | 8.89079579609909e-19 |                |           |
| 9.27727446131465e-18 | -0.352301381158977    |           | 1.76191323238805e-26 |                |           |
| 2.89335847080761e-25 | -0.181189808221335    |           | 8.86005799655441e-09 |                |           |
| 1.17495294116243e-07 | -0.127588067856578    |           | 3.65057273936817e-05 |                |           |
| 0.000510331827162113 | -0.160317805893778    |           | 2.8808686217423e-07  |                |           |
| 3.98234713914138e-06 | -0.102519193255219    |           | 0.000826483450949846 |                |           |
| 0.00280212963707239  |                       |           |                      |                |           |
| ENSG00000089041      | 12                    | 121132819 | 121188032            | protein_coding | P2RX7     |
| 55213                | -1.026392794383451    |           | 4.48846193197534e-38 |                |           |
| -0.926744909803216   | 4.757432086722298e-33 |           | 1.31879064909355e-31 |                |           |
| -0.317045152345962   | 6.49312867036179e-06  |           | 5.99623305012249e-05 |                |           |
| -0.298643612944576   | 2.28107524173483e-05  |           | 0.000348400697950852 |                |           |

```
-0.277846324590768.45632205655466e-05 0.000579591030880181 -
0.5396158901508938.20042521513029e-14 1.48206988893869e-12
ENSG00000099260 1 99645943 99694541 protein_coding PALMD
48598 -0.735039322682031.62471870821492e-25 3.42974156575613e-24
-0.769159344305191 1.82778876323949e-27 3.23949045989852e-26
-0.541296685541862 1.45424537218021e-15 9.72347152497661e-14
-0.294718458730074 8.2222737768498e-06 0.00015470386856225
-0.483474317303862 1.04740337608675e-12 5.53135498171374e-11
-0.542231716335555 1.32507812849683e-15 2.94484909612726e-14
ENSG00000100097 22 37675608 37679806 protein_coding LGALS1
4198 -0.255907200400789 5.61857953228279e-08
1.95820694705668e-07 -0.910295904147143 1.48211902474743e-59
3.12026111980272e-57 -0.191840171456733 3.69341403201686e-05
0.000275441346121544 -0.208155848554899 8.68757167074577e-06
0.000162282588799219 -0.283572274327308 2.47404712074617e-09
5.92061138158287e-08 -0.318126681386682 1.93489573812872e-11
2.55889140104476e-10
ENSG00000100612 14 60144120 60169856 protein_coding DHRS7
25736 -0.160431155960082 8.50661750253727e-18
7.94988566718825e-17 -0.261972150579161 4.24903155272943e-39
1.87523123399353e-37 -0.0694260079050224 9.95314452850153e-05
0.000646083494206356 -0.0997573883048526 3.62973749581667e-08
1.81825339058932e-06 -0.138409837106684 7.96773860883647e-14
5.64224544486651e-12 -0.131688214544051 6.12176970112352e-13
9.99696542702341e-12
ENSG00000100650 14 69726900 69772005 protein_coding SRSF5
45105 -0.2415151039278 5.23820774244641e-35 3.13869378536818e-33
-0.284938710730708 5.17763685795703e-45 3.58499576044945e-43
-0.108903541075178 1.27054640520263e-09 2.90940774697157e-08
-0.0794900721229244 8.11431396899238e-06 0.000153227754330827
-0.1359269218061 1.25523991177204e-13 8.57692218662135e-12 -
0.0520989345639125 0.00306097573725132 0.00896371071628538
ENSG00000101849 X 9463295 9719743 protein_coding TBL1X
256448 -0.0675640336317418 0.000400101065237941
0.000859037278850866 -0.0772835573415875 5.36435023639722e-05
0.00012845252433574 -0.080546668069001 2.38882940519571e-05
0.000188433282549589 -0.0667317761641124 0.000469860111628298
0.00396745294257846 -0.0937831758511214 1.21559707038176e-06
1.41856080595337e-05 -0.180359655239362 1.5176276285623e-19
5.17354941474225e-18
ENSG00000102901 16 67828157 67847811 protein_coding CENPT
19654 -0.178555613256561 1.22068929236785e-14
8.39978731704889e-14 -0.485095568983763 2.5710557719162e-68
9.76938484650794e-66 -0.0968293814815917 1.52264106600518e-05
0.000126445763151891 -0.170251986150779 1.56042995109445e-13
4.19136865656905e-11 -0.206996761930329 1.47704261855404e-18
2.32432797519731e-16 -0.139441394389553 8.14685728126324e-10
8.57295416151725e-09
ENSG00000103769 15 65726054 65891991 protein_coding RAB11A
165937 -0.0673733693254004 3.44085183382591e-05
8.53583291706591e-05 -0.295495667934537 5.36378567894862e-54
7.14208693096928e-52 -0.0704241530667389 1.39084172438149e-05
0.000117165281842643 -0.060198762305375 0.000207216146275737
0.00208406736141363 -0.0605637331922075 0.000203495217169715
```



|                 |                      |                      |                      |                |           |
|-----------------|----------------------|----------------------|----------------------|----------------|-----------|
|                 | 0.00122261935529772  | -0.0695400750071462  | 1.777854219954e-05   |                |           |
|                 | 8.91731838141126e-05 |                      |                      |                |           |
| ENSG00000103966 | 15                   | 41895939             | 41972578             | protein_coding | EHD4      |
|                 | 76639                | -0.243413125766026   | 2.99461509051953e-14 |                |           |
|                 | 1.99032032829368e-13 | -0.321040192997412   | 1.65467817392052e-22 |                |           |
|                 | 1.98141670034648e-21 | -0.100559047709472   | 0.00111709056388947  |                |           |
|                 | 0.00506937194722809  | -0.123031300262881   | 7.65013899206926e-05 |                |           |
|                 | 0.000940659158306606 | -0.117646640182224   | 0.000164811851640365 |                |           |
|                 | 0.00102458253659427  | -0.128688671859366   | 3.31017110397648e-05 |                |           |
|                 | 0.00015712722616956  |                      |                      |                |           |
| ENSG00000104219 | 8                    | 17156029             | 17224799             | protein_coding | ZDHC2     |
|                 | 68770                | -0.218056998688877   | 5.64166860342254e-17 |                |           |
|                 | 4.89101586937784e-16 | -0.309280088024206   | 4.92520590936049e-30 |                |           |
|                 | 1.0598036306896e-28  | -0.117815248736417   | 2.56241897444733e-06 |                |           |
|                 | 2.66844419805581e-05 | -0.0985083429242515  | 8.40322075261792e-05 |                |           |
|                 | 0.00101169842430475  | -0.141308735418554   | 2.76146542813254e-08 |                |           |
|                 | 4.98503706893128e-07 | -0.116039981326819   | 3.66514363799549e-06 |                |           |
|                 | 2.08391506336977e-05 |                      |                      |                |           |
| ENSG00000104361 | 8                    | 98189833             | 98294393             | protein_coding | NIPAL2    |
|                 | 104560               | -0.290269337443215   | 3.0803608834164e-21  |                |           |
|                 | 4.1156897257928e-20  | -0.275100655812191   | 1.74406208561383e-19 |                |           |
|                 | 1.63679176095047e-18 | -0.110797779941304   | 0.000129418254524382 |                |           |
|                 | 0.000811239013755217 | -0.110425711430054   | 0.000146223357607841 |                |           |
|                 | 0.00158305329268419  | -0.116502968470507   | 6.75190555949512e-05 |                |           |
|                 | 0.000475318286088452 | -0.120337058698006   | 3.39494589550019e-05 |                |           |
|                 | 0.000160759459288746 |                      |                      |                |           |
| ENSG00000105697 | 19                   | 35280716             | 35285143             | protein_coding | HAMP 4427 |
|                 | -2.031351647326429   | 4.5557861422519e-50  | 3.42577812165149e-47 | -              |           |
|                 | 2.28128997282991     | 3.74850086898709e-58 | 6.87034059269999e-56 | -              |           |
|                 | 1.21658248464693     | 2.49426183629882e-23 | 5.11290857206571e-21 | -              |           |
|                 | 0.56569628630911     | 9.2811082076284e-07  | 2.55009496942933e-05 | -              |           |
|                 | 0.5271204586329494   | 7.4537482403335e-06  | 4.69683572958167e-05 | -              |           |
|                 | 0.7794029097616752   | 6.4161543668137e-11  | 3.42947724067159e-10 | -              |           |
| ENSG00000105852 | 7                    | 95359944             | 95396368             | protein_coding | PON3      |
|                 | 36424                | -0.521937236993055   | 1.17479574323765e-39 |                |           |
|                 | 1.22014285892663e-37 | -0.258924809400708   | 8.58882516833325e-13 |                |           |
|                 | 4.64279345237556e-12 | -0.144000960884085   | 4.25913484068468e-05 |                |           |
|                 | 0.000311258747434503 | -0.150455612804918   | 2.11600627565026e-05 |                |           |
|                 | 0.000328666617830063 | -0.163640892340812   | 4.36701841628615e-06 |                |           |
|                 | 4.3836198393893e-05  | -0.245852557007204   | 8.05773590416869e-12 |                |           |
|                 | 1.12483393952548e-10 |                      |                      |                |           |
| ENSG00000106025 | 7                    | 120787320            | 120858402            | protein_coding | TSPAN12   |
|                 | 71082                | -0.156506065782342   | 3.27941251078356e-08 |                |           |
|                 | 1.18209087240854e-07 | -0.202995114498986   | 1.47084316146747e-12 |                |           |
|                 | 7.79396789540875e-12 | -0.103942597966228   | 0.000190084388032576 |                |           |
|                 | 0.0011302765958624   | -0.105601648378464   | 0.000161381665487688 |                |           |
|                 | 0.00172021393977179  | -0.217248309645783   | 6.43544154861164e-14 |                |           |
|                 | 4.70693633266764e-12 | -0.101310089158487   | 0.00027826228222852  |                |           |
|                 | 0.00105681328494347  |                      |                      |                |           |
| ENSG00000106070 | 7                    | 50590063             | 50793462             | protein_coding | GRB10     |
|                 | 203399               | -0.344404893374958   | 1.62515094213518e-38 |                |           |
|                 | 1.406568140418e-36   | -0.345262409365249   | 1.07397124540975e-38 |                |           |
|                 | 4.59653792094466e-37 | -0.116719606798434   | 9.53004946278701e-07 |                |           |
|                 | 1.10058295463869e-05 | -0.132339131153779   | 3.64965587316453e-08 |                |           |

|                 |                      |                     |                      |                |        |
|-----------------|----------------------|---------------------|----------------------|----------------|--------|
|                 | 1.82237143743687e-06 | -0.168942817279466  | 4.75611577053708e-12 |                |        |
|                 | 2.12308101974777e-10 | -0.249300771580922  | 3.16806148096131e-23 |                |        |
|                 | 1.66179224955879e-21 |                     |                      |                |        |
| ENSG00000107438 | 10                   | 95237572            | 95291024             | protein_coding | PDLIM1 |
|                 | 53452                | -0.238071629364411  | 6.62827549129255e-17 |                |        |
|                 | 5.70507756236721e-16 | -0.371447691827348  | 9.63061804094618e-35 |                |        |
|                 | 3.03101815070506e-33 | -0.0942268962332786 | 0.000545580719754184 |                |        |
|                 | 0.00276050731830154  | -0.114372489098743  | 3.16112113006224e-05 |                |        |
|                 | 0.000453055253774053 | -0.162097715763757  | 6.50671533771533e-09 |                |        |
|                 | 1.4001121304733e-07  | -0.160039679197766  | 7.14519949994562e-09 |                |        |
|                 | 6.56726035455179e-08 |                     |                      |                |        |
| ENSG00000107819 | 10                   | 101031234           | 101041244            | protein_coding | SFXN3  |
|                 | 10010                | -0.172228279309643  | 8.92164641733971e-07 |                |        |
|                 | 2.6977936633489e-06  | -0.551986520596809  | 4.14044943807017e-44 |                |        |
|                 | 2.72169037112638e-42 | -0.123785781703955  | 0.000347543206575063 |                |        |
|                 | 0.00188983442067466  | -0.116504718988945  | 0.000794170778486201 |                |        |
|                 | 0.00599624159494584  | -0.196135725330365  | 2.91732643464765e-08 |                |        |
|                 | 5.23003780499146e-07 | -0.283617895630815  | 2.68864081020116e-15 |                |        |
|                 | 5.74572499068914e-14 |                     |                      |                |        |
| ENSG00000107882 | 10                   | 102503987           | 102633535            | protein_coding | SUFU   |
|                 | 129548               | -0.133496540193812  | 1.37891267565089e-08 |                |        |
|                 | 5.16272063781908e-08 | -0.263083822274949  | 3.83842872468288e-26 |                |        |
|                 | 6.14582539587199e-25 | -0.136760390396419  | 5.39653870738125e-09 |                |        |
|                 | 1.08902430728358e-07 | -0.0901682570664244 | 0.000104025325716501 |                |        |
|                 | 0.00121303184830641  | -0.101788720601905  | 1.35719930304437e-05 |                |        |
|                 | 0.000116752114534115 | -0.0845624233340789 | 0.000255463551758984 |                |        |
|                 | 0.00097881620089848  |                     |                      |                |        |
| ENSG00000108231 | 10                   | 93757809            | 93806272             | protein_coding | LGI1   |
|                 | 48463                | -0.651698195361309  | 8.28794906077984e-26 |                |        |
|                 | 1.80584557227817e-24 | -0.536972313454294  | 2.47516622497797e-19 |                |        |
|                 | 2.28034385682624e-18 | -0.269870388785522  | 1.76658033195319e-06 |                |        |
|                 | 1.90989278219977e-05 | -0.244849616548757  | 1.5704000728892e-05  |                |        |
|                 | 0.000258344907450273 | -0.392022566221129  | 1.74911932115248e-11 |                |        |
|                 | 6.84661555382778e-10 | -0.262833391420244  | 4.16928725771159e-06 |                |        |
|                 | 2.34997562184837e-05 |                     |                      |                |        |
| ENSG00000109670 | 4                    | 152321259           | 152536101            | protein_coding | FBXW7  |
|                 | 214842               | -0.144870755772796  | 1.18497545561166e-10 |                |        |
|                 | 5.51890362420747e-10 | -0.235242693569233  | 1.0606422344863e-23  |                |        |
|                 | 1.40508038869576e-22 | -0.1627872976454    | 5.28866560851871e-13 |                |        |
|                 | 2.33405443385589e-11 | -0.104371513736647  | 2.53896955723936e-06 |                |        |
|                 | 5.76597765775977e-05 | -0.0789473751031098 | 0.000360959576830986 |                |        |
|                 | 0.00200306335800935  | -0.123175335812572  | 3.04049884970909e-08 |                |        |
|                 | 2.54119804611684e-07 |                     |                      |                |        |
| ENSG00000110066 | 11                   | 68154863            | 68213828             | protein_coding | KMT5B  |
|                 | 58965                | -0.245479031169402  | 1.27187315724189e-31 |                |        |
|                 | 5.0676501065656e-30  | -0.403645608242556  | 1.12457272562713e-65 |                |        |
|                 | 3.57545275358062e-63 | -0.0896805112883303 | 3.12501106818243e-06 |                |        |
|                 | 3.16544521659389e-05 | -0.0774664462724566 | 5.71444143451468e-05 |                |        |
|                 | 0.00074249610599086  | -0.186352615603221  | 4.10475098113709e-20 |                |        |
|                 | 8.19845070963265e-18 | -0.0871336935674858 | 5.87580592880018e-06 |                |        |
|                 | 3.21754588979887e-05 |                     |                      |                |        |
| ENSG00000110514 | 11                   | 47269161            | 47330031             | protein_coding | MADD   |
|                 | 60870                | -0.122583066815544  | 1.8898538836626e-14  |                |        |
|                 | 1.27234371882367e-13 | -0.190935531984767  | 7.38188821259919e-30 |                |        |

|                      |                       |                           |
|----------------------|-----------------------|---------------------------|
| 1.56679068752156e-28 | -0.0601508437437452   | 9.92332950889263e-05      |
| 0.000644617668332862 | -0.125596752579725    | 4.80779278817343e-15      |
| 1.59362986908413e-12 | -0.107314691758916    | 1.62159231314999e-11      |
| 6.41187478339179e-10 | -0.0593567686701491   | 0.000123190374084382      |
| 0.000509878543533631 |                       |                           |
| ENSG00000111057      | 12 52948871 52952901  | protein_coding KRT18 4030 |
| -0.118186141488033   | 3.09165899719329e-05  | 7.72989175369512e-05      |
| -0.431235424531128   | 1.23293475352884e-41  | 6.69264478230864e-40      |
| -0.122711459403433   | 1.40986063095557e-05  | 0.000118341695957203      |
| -0.156945540754595   | 4.12714787798305e-08  | 2.02829138142265e-06      |
| -0.177759358410226   | 7.83909046741161e-10  | 2.13879492805263e-08      |
| -0.293113853848627   | 8.11642706789561e-23  | 4.01415292986494e-21      |
| ENSG00000111700      | 12 20810702 20916911  | protein_coding SLCO1B3    |
| 106209               | -0.715414979638491    | 4.71860637985578e-29      |
| 1.473169715266e-27   | -0.897324640377391    | 1.97038596853674e-41      |
| 1.04766699671788e-39 | -0.384274991667354    | 1.04700426533802e-10      |
| 2.98741381862656e-09 | -0.309999193606962    | 1.64731249483397e-07      |
| 6.41034721757766e-06 | -0.462362644912944    | 2.79090262004231e-14      |
| 2.18489808631353e-12 | -0.566408610096424    | 4.04094026049388e-20      |
| 1.45389857547885e-18 |                       |                           |
| ENSG00000112139      | 6 37630679 37699306   | protein_coding MDGA1      |
| 68627                | -0.648173821407162    | 5.34059021899035e-21      |
| 6.9449962455468e-20  | -1.17285905834944     | 2.02711526169313e-50      |
| 2.06408030470047e-48 | -0.687834638972888    | 4.53424613636451e-23      |
| 8.82987756980284e-21 | -0.408028287999409    | 8.03043750087122e-10      |
| 7.58219308036805e-08 | -0.459146517315514    | 6.93407662649513e-12      |
| 2.98414308740794e-10 | -0.255996011736361    | 7.71587474052691e-05      |
| 0.00033446191592284  |                       |                           |
| ENSG00000112186      | 6 17393216 17557792   | protein_coding CAP2       |
| 164576               | -0.200131944679668    | 3.53050297948125e-19      |
| 3.86247934812769e-18 | -0.233956055931469    | 8.72349175628971e-25      |
| 1.26893817059979e-23 | -0.154073782344729    | 1.51600054207227e-12      |
| 6.1988904054971e-11  | -0.101061123381436    | 2.4941291865171e-06       |
| 5.68070739718566e-05 | -0.127524181662031    | 4.52558052087709e-09      |
| 1.00919373344731e-07 | -0.0997920694114773   | 3.01033874935497e-06      |
| 1.74342257904093e-05 |                       |                           |
| ENSG00000112320      | 6 107489958 107660167 | protein_coding SOBP       |
| 170209               | -1.146549462353366    | 1.6816646360454e-35       |
| 3.63991914153391e-33 | -1.02383667118024     | 2.00708440966986e-29      |
| 4.11425894976931e-28 | -0.320490546820595    | 0.000113081359325958      |
| 0.000725873299109639 | -0.279749077946053    | 0.000769432932476068      |
| 0.00584731495368032  | -0.464520189049433    | 4.22429903258332e-08      |
| 7.20814398999074e-07 | -0.985723522729597    | 9.41110178148551e-28      |
| 7.25819577493875e-26 |                       |                           |
| ENSG00000112773      | 6 81491439 81752774   | protein_coding FAM46A     |
| 261335               | -0.350323436881479    | 9.39675832252899e-18      |
| 8.74504766467618e-17 | -0.375950970911024    | 5.82860160662728e-20      |
| 5.71812244519184e-19 | -0.14117937571481     | 0.000286732441018147      |
| 0.00160165102137745  | -0.163198445296445    | 3.17263146255785e-05      |
| 0.000454286999588132 | -0.252290130461867    | 2.94800102630067e-10      |
| 8.7147832995708e-09  | -0.127118194938467    | 0.00107634978507289       |
| 0.00355188589316892  |                       |                           |
| ENSG00000114248      | 3 169839179 169869930 | protein_coding LRRC31     |
| 30751                | -0.890726335888467    | 1.18973488017329e-33      |

|                      |                      |                      |           |                         |
|----------------------|----------------------|----------------------|-----------|-------------------------|
| 5.86546825893029e-32 | -0.701726780668936   | 3.4896307878576e-23  |           |                         |
| 4.44521324971657e-22 | -0.483081013785462   | 1.19561491976726e-12 |           |                         |
| 4.98034353878451e-11 | -0.374935714594505   | 2.5452620151947e-08  |           |                         |
| 1.37206356175496e-06 | -0.694766695603667   | 1.52450345616235e-22 |           |                         |
| 3.95837322392553e-20 | -0.201035245418450   | .00230706742016004   |           |                         |
| 0.00699130168300645  |                      |                      |           |                         |
| ENSG00000114698      | 3                    | 146192339            | 146251179 | protein_coding PLSCR4   |
| 58840                | -0.297641985079237   | 6.05237809876321e-21 |           |                         |
| 7.85095740221749e-20 | -0.513806677580178   | 3.40184121451445e-49 |           |                         |
| 3.23154172444638e-47 | -0.128229015590138   | 1.93575951910076e-05 |           |                         |
| 0.00015633591263904  | -0.104252290300697   | 0.000515769676916932 |           |                         |
| 0.00425309741493762  | -0.163227002185867   | 8.80007197194291e-08 |           |                         |
| 1.3989420535806e-06  | -0.145585379494702   | 1.37424252026297e-06 |           |                         |
| 8.57401851148448e-06 |                      |                      |           |                         |
| ENSG00000115306      | 2                    | 54456285             | 54671445  | protein_coding SPTBN1   |
| 215160               | -0.238937939160591   | 6.67834068203938e-14 |           |                         |
| 4.3152994394646e-13  | -0.246684900190886   | 1.21110528860552e-14 |           |                         |
| 7.66984117527863e-14 | -0.198601677326634   | 2.47077031001713e-10 |           |                         |
| 6.50204909793189e-09 | -0.107786837827433   | 0.000494603142544769 |           |                         |
| 0.00412552017106792  | -0.146712519369338   | 2.7839260665442e-06  |           |                         |
| 2.97876265045962e-05 | -0.299952439137591   | .94843048732694e-20  |           |                         |
| 7.1930328346129e-19  |                      |                      |           |                         |
| ENSG00000115423      | 2                    | 84516455             | 84819589  | protein_coding DNAH6    |
| 303134               | -0.951390682869507   | 9.62155153088252e-38 |           |                         |
| 7.76653633676781e-36 | -0.657474337628167   | 1.6182605199224e-21  |           |                         |
| 1.7994918372499e-20  | -0.583852122738951   | 1.04562185804607e-17 |           |                         |
| 9.93277007713396e-16 | -0.347145988024278   | 1.39770730573627e-07 |           |                         |
| 5.65581353664034e-06 | -0.303947080397295   | 3.80790900282707e-06 |           |                         |
| 3.87734734346685e-05 | -0.467819568830603   | 2.98790445087124e-12 |           |                         |
| 4.39552062701822e-11 |                      |                      |           |                         |
| ENSG00000115594      | 2                    | 102064544            | 102179874 | protein_coding IL1R1    |
| 115330               | -0.333616763623991   | 3.73295081232305e-31 |           |                         |
| 1.43240494347736e-29 | -0.290431931864699   | 5.72292717262246e-25 |           |                         |
| 8.43495576369776e-24 | -0.173562146333588   | .9396468647616e-11   |           |                         |
| 2.58387307061449e-09 | -0.102184465792117   | 0.000108039237992456 |           |                         |
| 0.00124584995461471  | -0.135846891708571   | 3.68229260192806e-07 |           |                         |
| 4.9326256616885e-06  | -0.0785550667336068  | 0.00268487178338852  |           |                         |
| 0.00800222259678777  |                      |                      |           |                         |
| ENSG00000115738      | 2                    | 8678845              | 8684453   | protein_coding ID2 5608 |
| -0.666363580237091   | 5.25385442766876e-34 | 2.70131346959246e-32 |           |                         |
| -0.791435142980143   | .10054840122816e-44  | 2.04675608231922e-42 | -         |                         |
| 0.2082277026463312   | .81614992116595e-05  | 0.000216983890192454 | -         |                         |
| 0.2726554344836576   | .17491108176224e-08  | 2.78031617753682e-06 | -         |                         |
| 0.3960068549087341   | .78335404919237e-14  | 1.42476270422399e-12 | -         |                         |
| 0.3138529453820524   | .98368105578999e-10  | 5.39546679417319e-09 |           |                         |
| ENSG00000115963      | 2                    | 150468195            | 150539011 | protein_coding RND3     |
| 70816                | -0.227592737178956   | 8.28121152845041e-09 |           |                         |
| 3.18314814709423e-08 | -0.345365320637038   | 1.71454908013252e-17 |           |                         |
| 1.3628040877237e-16  | -0.170640807372453   | 1.16326894302102e-05 |           |                         |
| 0.000100014165912386 | -0.142711807495131   | 0.000247717830589393 |           |                         |
| 0.00239552829469408  | -0.266348913477976   | 2.70746213564779e-11 |           |                         |
| 1.01637476171704e-09 | -0.198266399601202   | 4.04760490762348e-07 |           |                         |
| 2.80630337587299e-06 |                      |                      |           |                         |

|                      |    |                      |                      |                |          |      |
|----------------------|----|----------------------|----------------------|----------------|----------|------|
| ENSG00000118007      | 3  | 136336233            | 136752403            | protein_coding | STAG1    |      |
| 416170               |    | -0.264021574481315   | 3.16732778011493e-26 |                |          |      |
| 7.23516121501619e-25 |    | -0.3034628002235     | 9.36468148333322e-33 |                |          |      |
| 2.54611470905494e-31 |    | -0.198122213892995   | 1.64881317194245e-16 |                |          |      |
| 1.29079700531112e-14 |    | -0.116116164066878   | 7.1174525750043e-07  |                |          |      |
| 2.06741758962389e-05 |    | -0.170454314125622   | 1.13692426582891e-12 |                |          |      |
| 5.90404771244952e-11 |    | -0.119783951065101   | 2.87789549223266e-07 |                |          |      |
| 2.03794244879512e-06 |    |                      |                      |                |          |      |
| ENSG00000118298      | 1  | 150257159            | 150265078            | protein_coding | CA14     | 7919 |
| -1.476086473674837   |    | 7.29518153063503e-24 | 1.27269465919108e-22 |                |          | -    |
| 1.57635196063897     |    | 1.10958198672534e-26 | 1.84878906643787e-25 |                |          | -    |
| 0.7066856642948832   |    | 3.1475365571567e-07  | 3.10073492711904e-06 |                |          | -    |
| 0.4639544081845880   |    | 0.000621191250292728 | 0.00494761681406463  |                |          | -    |
| 0.8769829190473563   |    | 3.8160578757536e-10  | 9.9212874886321e-09  |                |          | -    |
| 1.60312332550638     |    | 2.25973795104975e-27 | 1.66554914133468e-25 |                |          |      |
| ENSG00000119723      | 14 | 73949926             | 73963670             | protein_coding | COQ6     |      |
| 13744                |    | -0.188223898177642   | 7.25640876824072e-19 |                |          |      |
| 7.64868688771462e-18 |    | -0.278959324934484   | 1.38916769117869e-35 |                |          |      |
| 4.64417241649633e-34 |    | -0.105364028090221   | 2.25446253946837e-07 |                |          |      |
| 3.02517415179825e-06 |    | -0.100026079451089   | 9.51173717216765e-07 |                |          |      |
| 2.59970795447719e-05 |    | -0.113274185268953   | 3.7321082618537e-08  |                |          |      |
| 6.51091988929661e-07 |    | -0.141512306999397   | 7.54489944783336e-12 |                |          |      |
| 1.05513454665885e-10 |    |                      |                      |                |          |      |
| ENSG00000120708      | 5  | 136028895            | 136063818            | protein_coding | TGFBI    |      |
| 34923                |    | -0.751208046487621   | 1.34801168438268e-31 |                |          |      |
| 5.35731480382596e-30 |    | -1.067532902905571   | 1.14783333378948e-53 |                |          |      |
| 1.5026971014375e-51  |    | -0.766767506445785   | 7.0305642999949e-33  |                |          |      |
| 3.42278628842564e-30 |    | -0.340246957545748   | 1.21491172719609e-08 |                |          |      |
| 7.6318991120919e-07  |    | -0.527859499335264   | 1.21633244195665e-17 |                |          |      |
| 1.66221430817918e-15 |    | -0.456709228971614   | 1.07309180769164e-14 |                |          |      |
| 7.70081277573156e-13 |    |                      |                      |                |          |      |
| ENSG00000121210      | 4  | 153466346            | 153636711            | protein_coding | TMEM131L |      |
| 170365               |    | -0.317232215704812   | 3.2803831859861e-45  |                |          |      |
| 6.46899869044019e-43 |    | -0.273111797449653   | 4.57184009508826e-36 |                |          |      |
| 1.60055498519955e-34 |    | -0.090417425216752   | 4.34052820883482e-06 |                |          |      |
| 4.20790846082375e-05 |    | -0.122226125667959   | 9.83000221303803e-10 |                |          |      |
| 8.95564938461517e-08 |    | -0.154495540362793   | 3.39274987162645e-14 |                |          |      |
| 2.59096324755238e-12 |    | -0.159170508856359   | 3.93627003428803e-15 |                |          |      |
| 8.26457558816351e-14 |    |                      |                      |                |          |      |
| ENSG00000122085      | 2  | 241072169            | 241102332            | protein_coding | MTERF4   |      |
| 30163                |    | -0.0965232470935931  | 6.79032393364528e-07 |                |          |      |
| 2.08118151804564e-06 |    | -0.257453651279326   | 2.2757185855439e-34  |                |          |      |
| 1.86217546995046e-32 |    | -0.115756869841165   | 2.83164172817474e-09 |                |          |      |
| 6.07632871669893e-08 |    | -0.0947820467841192  | 1.0558854050073e-06  |                |          |      |
| 2.83154545659695e-05 |    | -0.116707806727133   | 2.93066239643248e-09 |                |          |      |
| 6.86568262767243e-08 |    | -0.129804554393153   | 3.67589419415566e-11 |                |          |      |
| 4.67102411506941e-10 |    |                      |                      |                |          |      |
| ENSG00000122786      | 7  | 134744252            | 134970728            | protein_coding | CALD1    |      |
| 226476               |    | -0.215767327439764   | 2.695483321599e-23   |                |          |      |
| 4.46258604327214e-22 |    | -0.335104796635491   | 2.31687207018019e-46 |                |          |      |
| 1.81379648147423e-44 |    | -0.115991268701697   | 1.81427140173854e-08 |                |          |      |
| 3.23763277980353e-07 |    | -0.0736974609701075  | 0.000312217582440763 |                |          |      |
| 0.00287041362915526  |    | -0.0922313329805231  | 7.92547960890625e-06 |                |          |      |

|                 |                      |                     |                      |                |          |
|-----------------|----------------------|---------------------|----------------------|----------------|----------|
|                 | 7.35822686693388e-05 | -0.102971857918348  | 5.11180842908713e-07 |                |          |
|                 | 3.47304245602915e-06 |                     |                      |                |          |
| ENSG00000123728 | X                    | 132203024           | 132219480            | protein_coding | RAP2C    |
|                 | 16456                | -0.0758795385785405 | 4.3328446722864e-06  |                |          |
|                 | 1.20645910901787e-05 | -0.149431538038829  | 3.00088423431038e-18 |                |          |
|                 | 2.54356776312957e-17 | -0.0841564211992338 | 3.34449175754882e-07 |                |          |
|                 | 4.30593722067235e-06 | -0.0625021920174156 | 0.000143213246033693 |                |          |
|                 | 0.00155804410611655  | -0.055168199203294  | 0.000813516482605689 |                |          |
|                 | 0.00401577100206402  | -0.0656336919048774 | 6.1811789976645e-05  |                |          |
|                 | 0.00027466225785686  |                     |                      |                |          |
| ENSG00000124067 | 16                   | 67943474            | 67969601             | protein_coding | SLC12A4  |
|                 | 26127                | -0.229913938000371  | 1.39649427998336e-26 |                |          |
|                 | 3.36259418668636e-25 | -0.350946730728056  | 5.5820511577076e-51  |                |          |
|                 | 6.85706560393239e-49 | -0.0870849053375133 | 1.4138110442359e-05  |                |          |
|                 | 0.000118609382111745 | -0.0767533173372907 | 0.000133569220098519 |                |          |
|                 | 0.0014789444775514   | -0.130927985448499  | 1.90297964413991e-10 |                |          |
|                 | 5.88224600715391e-09 | -0.0734836487040758 | 0.000235907996065181 |                |          |
|                 | 0.000911058668988462 |                     |                      |                |          |
| ENSG00000126214 | 14                   | 103561896           | 103714249            | protein_coding | KLC1     |
|                 | 152353               | -0.0770877684284903 | 0.000246354743887858 |                |          |
|                 | 0.000545397265173929 | -0.385726979416027  | 1.69668977616405e-54 |                |          |
|                 | 2.40297545662361e-52 | -0.0789110036122818 | 0.00016423935054342  |                |          |
|                 | 0.00099482303348209  | -0.138805564581729  | 9.70950763532343e-11 |                |          |
|                 | 1.24846389489209e-08 | -0.140336561543278  | 7.44438937552699e-11 |                |          |
|                 | 2.51575145512657e-09 | -0.125397454901933  | 6.7136456123445e-09  |                |          |
|                 | 3.49823782871385e-08 |                     |                      |                |          |
| ENSG00000126773 | 14                   | 60091911            | 60169133             | protein_coding | PCNX4    |
|                 | 77222                | -0.119850448807599  | 3.0561898933781e-08  |                |          |
|                 | 1.10469564614704e-07 | -0.241736531795807  | 4.86202554073171e-26 |                |          |
|                 | 7.68989806081821e-25 | -0.0913949053247016 | 1.86591593480573e-05 |                |          |
|                 | 0.000151165389226929 | -0.0877698229979238 | 4.20954571221243e-05 |                |          |
|                 | 0.000574310607307125 | -0.0898605486631743 | 3.00997449051347e-05 |                |          |
|                 | 0.0002362337158071   | -0.129804546633655  | 1.9919344605489e-09  |                |          |
|                 | 1.98543486633982e-08 |                     |                      |                |          |
| ENSG00000127990 | 7                    | 94585230            | 94656209             | protein_coding | SGCE     |
|                 | 70979                | -0.540522900619752  | 5.56933515819942e-37 |                |          |
|                 | 3.9525801085277e-35  | -0.676661962595135  | 1.0272825270679e-51  |                |          |
|                 | 1.13503790703481e-49 | -0.350859456994822  | 9.88475579722575e-19 |                |          |
|                 | 1.11590297510855e-16 | -0.258951190076057  | 2.84464303650368e-11 |                |          |
|                 | 4.22063751101817e-09 | -0.312698358939195  | 2.97790455678911e-15 |                |          |
|                 | 2.74513462072293e-13 | -0.260336346251183  | 2.00008198247552e-11 |                |          |
|                 | 2.63663724529579e-10 |                     |                      |                |          |
| ENSG00000128641 | 2                    | 191245185           | 191425389            | protein_coding | MYO1B    |
|                 | 180204               | -0.437702468069727  | 9.56240629706022e-41 |                |          |
|                 | 1.11173677389478e-38 | -0.298955828097547  | 3.11080928263885e-22 |                |          |
|                 | 3.66036992554612e-21 | -0.113900977382725  | 8.79012381502436e-05 |                |          |
|                 | 0.000580998468028275 | -0.0932007861378281 | 0.00135197154027625  |                |          |
|                 | 0.00909428524437117  | -0.172633888902296  | 1.733078775442e-09   |                |          |
|                 | 1.33389685747935e-07 | -0.139642223145987  | 1.69806967686776e-06 |                |          |
|                 | 1.03498542628806e-05 |                     |                      |                |          |
| ENSG00000129595 | 5                    | 112142441           | 112419316            | protein_coding | EPB41L4A |
|                 | 276875               | -0.338781579811634  | 1.52135265723475e-29 |                |          |
|                 | 5.01081459768713e-28 | -0.381476147234817  | 1.1539240465084e-35  |                |          |
|                 | 3.93369424957426e-34 | -0.139998737547346  | 4.49161417224886e-07 |                |          |



|                 |                      |                     |                      |                |        |
|-----------------|----------------------|---------------------|----------------------|----------------|--------|
|                 | 5.5979885751572e-06  | -0.138958874688998  | 6.09768321257507e-07 |                |        |
|                 | 1.823336022432e-05   | -0.166004562342082  | 3.80118358425004e-09 |                |        |
|                 | 8.62008737004121e-08 | -0.0928096266607925 | 0.000738081215337018 |                |        |
|                 | 0.00253551648373438  |                     |                      |                |        |
| ENSG00000130396 | 6                    | 167826922           | 167972023            | protein_coding | AFDN   |
|                 | 145101               | -0.316851972015796  | 1.45479655084985e-35 |                |        |
|                 | 9.25072467987341e-34 | -0.323631856597997  | 9.86723215672649e-37 |                |        |
|                 | 3.66003832784862e-35 | -0.0823824609083026 | 0.000325720591004908 |                |        |
|                 | 0.00178487551433889  | -0.126514841028394  | 5.59534017492998e-08 |                |        |
|                 | 2.58873065733906e-06 | -0.163101172394006  | 5.92020788864828e-12 |                |        |
|                 | 2.60539318353818e-10 | -0.070627091315659  | 0.00200577576128133  |                |        |
|                 | 0.0061852693161128   |                     |                      |                |        |
| ENSG00000130714 | 9                    | 131502902           | 131523806            | protein_coding | POMT1  |
|                 | 20904                | -0.110810902457463  | 1.04528646108813e-11 |                |        |
|                 | 5.37797812988504e-11 | -0.141442244668837  | 1.5224227507429e-17  |                |        |
|                 | 1.21879876843904e-16 | -0.057631793680172  | 0.000276371908150891 |                |        |
|                 | 0.00155436749353167  | -0.0659385800136789 | 3.62396815249854e-05 |                |        |
|                 | 0.000507714027408047 | -0.0960289037356219 | 3.35101291234534e-09 |                |        |
|                 | 7.73413780169305e-08 | -0.0555492350071978 | 0.000456534431290171 |                |        |
|                 | 0.00164866710826833  |                     |                      |                |        |
| ENSG00000130985 | X                    | 47190861            | 47215128             | protein_coding | UBA1   |
|                 | 24267                | -0.0490532500015206 | 2.12396497297139e-05 |                |        |
|                 | 5.43426676201696e-05 | -0.135047404456838  | 1.15537796667418e-27 |                |        |
|                 | 2.0808824673777e-26  | -0.108154060770707  | 1.99837878761408e-19 |                |        |
|                 | 2.4133909404837e-17  | -0.0755835281064385 | 1.15082907706047e-10 |                |        |
|                 | 1.42291795170834e-08 | -0.0505974280244512 | 1.30039049523414e-05 |                |        |
|                 | 0.000112434979580059 | -0.0358542693788468 | 0.00168137238168463  |                |        |
|                 | 0.00529173744126563  |                     |                      |                |        |
| ENSG00000134453 | 10                   | 6088987             | 6117457              | protein_coding | RBM17  |
|                 | 28470                | -0.132314890044178  | 2.00532486126174e-19 |                |        |
|                 | 2.25241211345326e-18 | -0.154563818924995  | 4.41036126897502e-25 |                |        |
|                 | 6.55620402761086e-24 | -0.0530506324874604 | 0.000141664024786439 |                |        |
|                 | 0.000875439842184818 | -0.086712848895302  | 1.10054757980041e-09 |                |        |
|                 | 9.79057826490815e-08 | -0.0906045266910223 | 2.50398137461113e-10 |                |        |
|                 | 7.53079649325612e-09 | -0.0511284806801093 | 0.000245121558440945 |                |        |
|                 | 0.000944299890937556 |                     |                      |                |        |
| ENSG00000134716 | 1                    | 59893308            | 59926790             | protein_coding | CYP2J2 |
|                 | 33482                | -0.152632382356093  | 1.36169967555315e-11 |                |        |
|                 | 6.95766456065679e-11 | -0.368137242361507  | 1.51387503581465e-47 |                |        |
|                 | 1.28877919032549e-45 | -0.0672256633241881 | 0.00214859511584117  |                |        |
|                 | 0.00874806268511436  | -0.133684186196922  | 2.44429220272164e-09 |                |        |
|                 | 1.92622318845521e-07 | -0.212076385990533  | 8.30250842023293e-20 |                |        |
|                 | 1.57737534974157e-17 | -0.221556441036642  | 1.32328067604315e-21 |                |        |
|                 | 5.66356858573523e-20 |                     |                      |                |        |
| ENSG00000134760 | 18                   | 31318089            | 31357029             | protein_coding | DSG1   |
|                 | 38940                | -0.581180767547957  | 9.87041347869829e-10 |                |        |
|                 | 4.2025463674403e-09  | -1.114857099839253  | .98358054060022e-28  |                |        |
|                 | 7.43235943018094e-27 | -0.464365646667462  | 7.08483179143729e-07 |                |        |
|                 | 8.45134720358358e-06 | -0.417890842487067  | 8.1077167222632e-06  |                |        |
|                 | 0.000153227754330827 | -0.561189380276281  | 3.77225868862065e-09 |                |        |
|                 | 8.57927271679141e-08 | -0.625796805019202  | 4.59650563090199e-11 |                |        |
|                 | 5.76097837681594e-10 |                     |                      |                |        |
| ENSG00000136040 | 12                   | 94148723            | 94307675             | protein_coding | PLXNC1 |
|                 | 158952               | -1.406581905899032  | .85381516876039e-75  |                |        |



|                      |                     |                      |           |                |          |
|----------------------|---------------------|----------------------|-----------|----------------|----------|
| 5.55744831426477e-72 | -0.960471406559043  | 7.28476882307373e-45 |           |                |          |
| 4.97760585502919e-43 | -0.303719284705514  | 3.8864904240669e-07  |           |                |          |
| 4.95074687788538e-06 | -0.441906116276155  | 7.1076243999861e-13  |           |                |          |
| 1.32788012019013e-10 | -0.486012784357102  | 4.46415391507702e-15 |           |                |          |
| 3.90713785634747e-13 | -0.465203415390222  | 3.28554066567484e-14 |           |                |          |
| 6.28042184423907e-13 |                     |                      |           |                |          |
| ENSG00000136828      | 9                   | 126914774            | 127223166 | protein_coding | RALGPS1  |
| 308392               | -0.615460606210561  | 3.17691499047616e-39 |           |                |          |
| 3.0741092320887e-37  | -0.628900201031207  | 1.19049157290552e-40 |           |                |          |
| 5.86919880199213e-39 | -0.208360427610715  | 6.44387739787892e-07 |           |                |          |
| 7.77975206669072e-06 | -0.165912805521284  | 7.14641640995515e-05 |           |                |          |
| 0.000894249166672219 | -0.160518440115514  | 0.000128161748936602 |           |                |          |
| 0.000826762685997235 | -0.167078635816213  | 6.04023259876236e-05 |           |                |          |
| 0.000269319101093091 |                     |                      |           |                |          |
| ENSG00000137275      | 6                   | 3063991              | 3115187   | protein_coding | RIPK1    |
| 51196                | -0.157059068828103  | 2.63493464368318e-24 |           |                |          |
| 4.91024483420339e-23 | -0.249956411000231  | 6.07674964501248e-50 |           |                |          |
| 6.02991609679296e-48 | -0.0517135666283783 | 0.00033378745021893  |           |                |          |
| 0.00182203037384748  | -0.101682702897265  | 7.07882156285928e-12 |           |                |          |
| 1.25319274008846e-09 | -0.104513488692284  | 2.47250428918305e-12 |           |                |          |
| 1.17079466021832e-10 | -0.0556485177961603 | 0.000116780774206923 |           |                |          |
| 0.00048515404836524  |                     |                      |           |                |          |
| ENSG00000137343      | 6                   | 30626842             | 30646823  | protein_coding | ATAT1    |
| 19981                | -0.170808014491624  | 2.216104168477e-07   |           |                |          |
| 7.21820757698163e-07 | -0.214931774455015  | 1.05941841420081e-10 |           |                |          |
| 4.67952352561228e-10 | -0.151772932128431  | 3.44776769686353e-06 |           |                |          |
| 3.4586460366669e-05  | -0.1098212522036    | 0.000757346530505462 |           |                |          |
| 0.00576389916890307  | -0.188950868922248  | 1.31349896490569e-08 |           |                |          |
| 2.59353616910846e-07 | -0.0954535836564556 | 0.00324020279699605  |           |                |          |
| 0.00942653956571457  |                     |                      |           |                |          |
| ENSG00000137942      | 1                   | 93448131             | 93554661  | protein_coding | FNBP1L   |
| 106530               | -0.151767851911872  | 1.1688010314931e-09  |           |                |          |
| 4.92128412692732e-09 | -0.316825275441954  | 3.40295192482158e-32 |           |                |          |
| 8.71950461131504e-31 | -0.0881582254948956 | 0.000305028735709757 |           |                |          |
| 0.00168773469074499  | -0.149206618509095  | 2.13260257040022e-09 |           |                |          |
| 1.75787383302989e-07 | -0.198203985613811  | 7.22200490124731e-15 |           |                |          |
| 6.04901152454473e-13 | -0.104195604909523  | 2.1253092007372e-05  |           |                |          |
| 0.000104845446606348 |                     |                      |           |                |          |
| ENSG00000137962      | 1                   | 94148988             | 94275068  | protein_coding | ARHGAP29 |
| 126080               | -0.457284678407717  | 1.44518767844674e-40 |           |                |          |
| 1.65548373842071e-38 | -0.430734596141689  | 4.95091390684876e-37 |           |                |          |
| 1.8812265306048e-35  | -0.164483213422668  | 8.21810802712966e-08 |           |                |          |
| 1.23890157874919e-06 | -0.141503299284603  | 3.93109405998706e-06 |           |                |          |
| 8.30970344105e-05    | -0.215026498492907  | 7.08825218443562e-12 |           |                |          |
| 3.03373298849787e-10 | -0.120489296694941  | 7.39490156274973e-05 |           |                |          |
| 0.000322252227821197 |                     |                      |           |                |          |
| ENSG00000138814      | 4                   | 101023409            | 101348278 | protein_coding | PPP3CA   |
| 324869               | -0.191637316491232  | 2.92411535279213e-20 |           |                |          |
| 3.56732913712989e-19 | -0.259349136941596  | 4.93433659152722e-33 |           |                |          |
| 1.36297925105324e-31 | -0.0660102832641813 | 0.000774744298877426 |           |                |          |
| 0.00372293073171234  | -0.0869633193393815 | 1.16610212688276e-05 |           |                |          |
| 0.000204349887904461 | -0.129978266931321  | 3.3987038815801e-10  |           |                |          |
| 4.27742638875281e-09 | -0.0803029961261394 | 4.65712043061935e-05 |           |                |          |
| 0.000213580450952661 |                     |                      |           |                |          |

|                 |    |                      |                      |                |         |                      |
|-----------------|----|----------------------|----------------------|----------------|---------|----------------------|
| ENSG00000139190 | 12 | 6462237              | 6470987              | protein_coding | VAMP1   | 8750                 |
|                 |    | -0.152400051735553   | 7.90979113356087e-05 |                |         | 0.00018690525719664  |
|                 |    | -0.124843611132280   | 0.00115368784157407  |                |         | 0.00230782009294843  |
|                 |    | 0.2260103115533276   | 4.5047584548957e-09  |                |         | 1.2768991511675e-07  |
|                 |    | 0.1272847879052      | 0.000938677594124434 |                |         | 0.00684628194703397  |
|                 |    | 0.22439104818976     | 1.09056419941614e-08 |                |         | 2.18379173042469e-07 |
|                 |    | 0.2690894515769168   | 1.15593865665929e-12 |                |         | 1.13650597792572e-10 |
| ENSG00000139597 | 13 | 32400723             | 32428311             | protein_coding | N4BP2L1 |                      |
|                 |    | 27588                | -0.531613972289331   |                |         | 2.90596067487703e-28 |
|                 |    | 8.36819988057472e-27 | -0.403814474046421   |                |         | 4.00989697439652e-18 |
|                 |    | 3.35861209484534e-17 | -0.134566362079529   |                |         | 0.00232764820954334  |
|                 |    | 0.00937013732725468  | -0.218219526413875   |                |         | 1.15363053792592e-06 |
|                 |    | 3.03588009296418e-05 | -0.231381761000642   |                |         | 9.7837899433475e-07  |
|                 |    | 4.10180187364208e-06 | -0.466375341332447   |                |         | 5.13666065054081e-23 |
|                 |    | 2.58142052499275e-21 |                      |                |         |                      |
| ENSG00000139613 | 12 | 56162983             | 56189567             | protein_coding | SMARCC2 |                      |
|                 |    | 26584                | -0.279536187486634   |                |         | 2.1657114330103e-28  |
|                 |    | 6.28298294504049e-27 | -0.230681154938761   |                |         | 8.45696107895521e-21 |
|                 |    | 8.85423364576904e-20 | -0.0847802145086831  |                |         | 0.00027503412569693  |
|                 |    | 0.0015479612154019   | -0.117178886232228   |                |         | 6.8739857470391e-07  |
|                 |    | 2.01675751324147e-05 | -0.169184585037949   |                |         | 2.3257259909066e-12  |
|                 |    | 1.11484569884104e-10 | -0.129739186741691   |                |         | 3.81591763108813e-08 |
|                 |    | 3.15040703628627e-07 |                      |                |         |                      |
| ENSG00000139641 | 12 | 56118250             | 56144671             | protein_coding | ESYT1   |                      |
|                 |    | 26421                | -0.336018250580713   |                |         | 2.60287731589926e-44 |
|                 |    | 4.66094548326375e-42 | -0.376089657410661   |                |         | 3.24864618524242e-52 |
|                 |    | 3.77691484476804e-50 | -0.0828573241032444  |                |         | 8.45620002980546e-05 |
|                 |    | 0.000562266923876821 | -0.139417795757943   |                |         | 1.00961791740381e-10 |
|                 |    | 1.27876727928731e-08 | -0.176780314343086   |                |         | 9.83789441120921e-16 |
|                 |    | 9.8246510918095e-14  | -0.201059865156029   |                |         | 8.44870830886995e-20 |
|                 |    | 2.95780734255921e-18 |                      |                |         |                      |
| ENSG00000139668 | 13 | 51584455             | 51767707             | protein_coding | WDFY2   |                      |
|                 |    | 183252               | -0.183480406431687   |                |         | 6.777706498169e-12   |
|                 |    | 3.58783178848028e-11 | -0.259541520065504   |                |         | 4.23221840351062e-21 |
|                 |    | 4.52841555688819e-20 | -0.193334690647673   |                |         | 4.53058541834943e-13 |
|                 |    | 2.04835963524234e-11 | -0.118430169123409   |                |         | 6.38823279181296e-06 |
|                 |    | 0.000125342920231302 | -0.0832478022689349  |                |         | 0.00147441044875894  |
|                 |    | 0.00666952392021357  | -0.0920942271462364  |                |         | 0.000393838245387196 |
|                 |    | 0.00144365770814607  |                      |                |         |                      |
| ENSG00000140807 | 16 | 50548330             | 50649249             | protein_coding | NKD1    |                      |
|                 |    | 100919               | -0.424922854602764   |                |         | 2.22540371492596e-07 |
|                 |    | 7.24244087629654e-07 | -0.350865590933366   |                |         | 1.64499923566964e-05 |
|                 |    | 4.19365784527856e-05 | -0.264536844641706   |                |         | 0.00104152315063226  |
|                 |    | 0.00478067056545705  | -0.272320403421406   |                |         | 0.000783638528194426 |
|                 |    | 0.00593212081182748  | -0.463869109881369   |                |         | 2.03533533923932e-08 |
|                 |    | 3.8295276871992e-07  | -0.362269081894028   |                |         | 3.2897840686008e-06  |
|                 |    | 4.4376591860627e-05  |                      |                |         |                      |
| ENSG00000141699 | 17 | 42579513             | 42610623             | protein_coding | RETREG3 |                      |
|                 |    | 31110                | -0.174558778962672   |                |         | 3.64677101115915e-19 |
|                 |    | 3.98407594104049e-18 | -0.271167505705646   |                |         | 8.38084167502003e-39 |
|                 |    | 3.61676267188745e-37 | -0.0851985139501901  |                |         | 4.7898232346526e-06  |
|                 |    | 4.59486799092689e-05 | -0.142778660247241   |                |         | 9.53313802076078e-14 |
|                 |    | 2.65208495045415e-11 | -0.0792109225117814  |                |         | 2.42971722255939e-05 |

|                 |                      |                     |                      |                |           |
|-----------------|----------------------|---------------------|----------------------|----------------|-----------|
|                 | 0.000195047626464529 | -0.0725838852457343 | 9.21101568271923e-05 |                |           |
|                 | 0.000392715964206576 |                     |                      |                |           |
| ENSG00000141736 | 17                   | 39687914            | 39730426             | protein_coding | ERBB2     |
|                 | 42512                | -0.682394143819305  | 3.14235535073085e-45 |                |           |
|                 | 6.29512340121298e-43 | -0.686557831423326  | 1.09618280450138e-45 |                |           |
|                 | 8.01757366728969e-44 | -0.250258527773074  | .61635283390464e-09  |                |           |
|                 | 9.57631968034626e-08 | -0.223010111571815  | 1.75114520800283e-07 |                |           |
|                 | 6.70297080969928e-06 | -0.316564169438339  | 4.11952922524178e-13 |                |           |
|                 | 2.41271224812187e-11 | -0.188652710210442  | 8.1693109961744e-06  |                |           |
|                 | 4.3570590896748e-05  |                     |                      |                |           |
| ENSG00000142687 | 1                    | 35433490            | 35557950             | protein_coding | KIAA0319L |
|                 | 124460               | -0.164621432817743  | 6.28467770951847e-21 |                |           |
|                 | 8.13873599639137e-20 | -0.235115668718537  | 5.05709248808465e-37 |                |           |
|                 | 1.90761365307193e-35 | -0.0963848123851712 | 9.50848327784777e-09 |                |           |
|                 | 1.81757866239988e-07 | -0.0729019289357415 | 1.2874786521973e-05  |                |           |
|                 | 0.000221386643737106 | -0.0970272551479097 | 1.04602198886685e-08 |                |           |
|                 | 2.108147032931e-07   | -0.0631205189336743 | 0.000140998436235892 |                |           |
|                 | 0.000574428514152447 |                     |                      |                |           |
| ENSG00000143178 | 1                    | 168281040           | 168314426            | protein_coding | TBX19     |
|                 | 33386                | -0.334965419455049  | 8.6684760024694e-11  |                |           |
|                 | 4.09479040759462e-10 | -0.423207674361622  | 7.37431472368793e-16 |                |           |
|                 | 5.2101790966138e-15  | -0.212487343719247  | 2.53039823513374e-05 |                |           |
|                 | 0.000198095849774616 | -0.314262294637849  | 9.96798279199475e-10 |                |           |
|                 | 9.02855836723757e-08 | -0.199702354452242  | 8.49539398379101e-05 |                |           |
|                 | 0.000582012941396131 | -0.293995400377018  | .7384351403234e-09   |                |           |
|                 | 7.92410250588464e-08 |                     |                      |                |           |
| ENSG00000143224 | 1                    | 161166410           | 161178013            | protein_coding | PPOX      |
|                 | 11603                | -0.200326954592998  | 8.98706916099187e-12 |                |           |
|                 | 4.67165667197505e-11 | -0.327035525277714  | 2.22775641008978e-26 |                |           |
|                 | 3.63796825081643e-25 | -0.126533916268231  | 1.01638825183318e-05 |                |           |
|                 | 8.88071372703822e-05 | -0.103501343486186  | 0.000306275091387108 |                |           |
|                 | 0.00283172679449243  | -0.150219495833217  | 2.37620924253373e-07 |                |           |
|                 | 3.35925261247123e-06 | -0.302017715503732  | 2.75248165436537e-23 |                |           |
|                 | 1.4535902268935e-21  |                     |                      |                |           |
| ENSG00000143393 | 1                    | 151291797           | 151327715            | protein_coding | PI4KB     |
|                 | 35918                | -0.0878519741353978 | 8.32168092103047e-08 |                |           |
|                 | 2.84305848834942e-07 | -0.168265897071941  | .17805479720504e-22  |                |           |
|                 | 1.42160462321126e-21 | -0.0765193917618108 | 2.4511993392983e-06  |                |           |
|                 | 2.56807226004897e-05 | -0.0909313154744691 | 3.01021121210676e-08 |                |           |
|                 | 1.5528503468017e-06  | -0.0933004761760134 | 1.57124187566589e-08 |                |           |
|                 | 3.0288140680648e-07  | -0.162276708233011  | .7240084482168e-21   |                |           |
|                 | 7.27867957039826e-20 |                     |                      |                |           |
| ENSG00000143418 | 1                    | 150960583           | 150975004            | protein_coding | CERS2     |
|                 | 14421                | -0.159575878552427  | 1.21741908187474e-18 |                |           |
|                 | 1.25271941060281e-17 | -0.262650348784755  | 2.80300527316184e-41 |                |           |
|                 | 1.47527091724961e-39 | -0.114803959613393  | 6.6518887655887e-11  |                |           |
|                 | 1.99672013639897e-09 | -0.115692266041185  | 5.89021711594281e-11 |                |           |
|                 | 8.19477096569186e-09 | -0.101136529714205  | 9.87773097619363e-09 |                |           |
|                 | 2.00371316247553e-07 | -0.181280451754269  | 3.45641169389785e-23 |                |           |
|                 | 1.80091765147942e-21 |                     |                      |                |           |
| ENSG00000143437 | 1                    | 150809705           | 150876768            | protein_coding | ARNT      |
|                 | 67063                | -0.269721327904319  | 1.68919550933238e-32 |                |           |
|                 | 7.3508315195221e-31  | -0.241203691725982  | 3.16706682550019e-27 |                |           |
|                 | 5.50666674938252e-26 | -0.0866694470364484 | 2.86741953454121e-05 |                |           |

|                      |                       |                        |
|----------------------|-----------------------|------------------------|
| 0.000220382481147595 | -0.117272049411303    | 2.38375650307536e-08   |
| 1.29848050914025e-06 | -0.105791101748839    | 4.85624294698575e-07   |
| 6.24735003064335e-06 | -0.111540497769793    | 9.22743096077685e-08   |
| 7.1130206302792e-07  |                       |                        |
| ENSG00000143554      | 1 153774354 153780157 | protein_coding SLC27A3 |
| 5803                 | -0.549811832701931    | 4.12307006640461e-32   |
| 1.73135602599777e-30 | -0.555250737314988    | 1.01137774696803e-32   |
| 2.73546075000259e-31 | -0.132627765766249    | 0.00165456969423013    |
| 0.00702166746565275  | -0.221120408554512    | 5.0953921663157e-07    |
| 9.00832061195928e-06 | -0.226503011501252    | 1.46026762022683e-07   |
| 2.18535151349796e-06 | -0.558666908969316    | 4.15079247557517e-33   |
| 4.86204481029967e-31 |                       |                        |
| ENSG00000145349      | 4 113451032 113761927 | protein_coding CAMK2D  |
| 310895               | -0.229653473187848    | 2.5713002816383e-22    |
| 3.83700067889301e-21 | -0.229978598517322    | 1.9876256549678e-22    |
| 2.60887448650985e-21 | -0.153931491193811    | 1.26093777442292e-11   |
| 4.30918068783136e-10 | -0.125518004962193    | 2.77730051058651e-08   |
| 1.45824599192616e-06 | -0.113456625974755    | 5.24090876458796e-07   |
| 6.67605213765461e-06 | -0.0919534242660722   | 3.68248419816601e-05   |
| 0.000172487736991065 |                       |                        |
| ENSG00000145476      | 4 186191520 186213456 | protein_coding CYP4V2  |
| 21936                | -0.444309162168771    | 3.38696262956296e-34   |
| 1.77661585205257e-32 | -0.234164636089406    | 4.96153455238072e-12   |
| 2.48220124571417e-11 | -0.196750600074826    | 3.99223699450732e-09   |
| 8.3483302197892e-08  | -0.118049279920850    | 0.000360566169675963   |
| 0.00322645626500966  | -0.186476879373779    | 3.04881514231534e-08   |
| 5.42828469738636e-07 | -0.295503944527679    | 8.12099750906088e-18   |
| 2.30870474805948e-16 |                       |                        |
| ENSG00000145604      | 5 36151989 36184319   | protein_coding SKP2    |
| 32330                | -0.481239557663087    | 1.00982786387896e-23   |
| 1.73835450733373e-22 | -0.489782407600615    | 1.88283018807072e-24   |
| 2.67188495110852e-23 | -0.174937514820041    | 9.45143053303171e-05   |
| 0.000617115826798412 | -0.198622852360045    | 1.09314654303468e-05   |
| 0.000194784059870832 | -0.294501836723054    | 1.65253541063631e-10   |
| 5.21150792759173e-09 | -0.182480487414335    | 4.80827414965038e-05   |
| 0.00021980077164731  |                       |                        |
| ENSG00000145826      | 5 135922279 135955034 | protein_coding LECT2   |
| 32755                | -0.323715919200439    | 0.000538880617185592   |
| 0.00113341719118865  | -1.076384402065632    | 8.5201762763549e-26    |
| 4.59954271438233e-25 | -1.455517362082369    | 7.3287484790731e-42    |
| 1.01085638170365e-38 | -0.316626992788629    | 0.000713157302440512   |
| 0.00553216991417471  | -0.654854800690452    | 1.27384369737253e-11   |
| 5.10159664816623e-10 | -0.685660514067332    | 1.20965625496808e-12   |
| 1.86586483130175e-11 |                       |                        |
| ENSG00000146147      | 6 53929982 54266280   | protein_coding MLIP    |
| 336298               | -0.375910975495366    | 2.0836453418984e-14    |
| 1.3973788541298e-13  | -0.617684797648638    | 3.83749567276558e-32   |
| 9.80071230918277e-31 | -0.478019063254433    | 1.43468909275241e-21   |
| 2.48344681955443e-19 | -0.271761472864251    | 1.58658773225129e-08   |
| 9.5434170968119e-07  | -0.362110854322947    | 1.91285174821043e-13   |
| 1.23141807377563e-11 | -0.411465588281382    | 7.77179497582619e-17   |
| 1.95600636394824e-15 |                       |                        |
| ENSG00000146285      | 6 107704104 107824317 | protein_coding SCML4   |
| 120213               | -0.816430847297443    | 2.11937133276019e-21   |

|                      |                      |                      |                      |                |          |
|----------------------|----------------------|----------------------|----------------------|----------------|----------|
| 2.87610505166123e-20 | -0.577485208187787   | 2.93469305898894e-12 |                      |                |          |
| 1.51039257238152e-11 | -0.440055126020556   | .32076694978323e-08  |                      |                |          |
| 9.83728554552178e-07 | -0.350075297170815   | 1.54834173056479e-05 |                      |                |          |
| 0.000255255193867395 | -0.298220636123439   | 0.000228422996815791 |                      |                |          |
| 0.00134946972845545  | -0.490320971781326   | 2.19901121649145e-09 |                      |                |          |
| 2.16825289504558e-08 |                      |                      |                      |                |          |
| ENSG00000146904      | 7                    | 143390289            | 143408892            | protein_coding | EPHA1    |
| 18603                | -0.615269508374031   | .09354048721145e-21  | 1.51838389039814e-20 |                |          |
|                      | -0.462091460012537   | 1.40837174909803e-13 | 8.16562094499376e-13 |                |          |
|                      | -0.201121426880114   | 0.000853104356837132 | 0.00403353953722782  |                |          |
|                      | -0.211610006208528   | 0.000483456679243331 | 0.00404933957308164  |                |          |
|                      | -0.330384391855013   | 8.41884055956166e-08 | 1.3479662597884e-06  |                |          |
|                      | -0.391312986984174   | 2.24167594776171e-10 | 2.55659367424449e-09 |                |          |
| ENSG00000149212      | 11                   | 95165513             | 95232541             | protein_coding | SESN3    |
| 67028                | -1.321730637162993   | .21035138984971e-50  | 1.21985522688948e-47 |                |          |
|                      | -1.199710283647351   | .24567534256362e-43  | 7.85683245416946e-42 | -              |          |
|                      | 0.4861371984684992   | .86353634538031e-10  | 7.46003891717053e-09 | -              |          |
|                      | 0.4384727733641881   | .27093600537374e-08  | 7.88841116642129e-07 | -              |          |
|                      | 0.4591872197032733   | .26035314523324e-09  | 7.53605959192711e-08 | -              |          |
|                      | 0.4351792314664111   | .39142740542655e-08  | 1.23375341770861e-07 |                |          |
| ENSG00000150403      | 13                   | 113490995            | 113554590            | protein_coding | TMCO3    |
| 63595                | -0.375680208490142   | 2.5050602702744e-39  |                      |                |          |
|                      | 2.48575375481559e-37 | -0.372886581218618   | 6.95738385090316e-39 |                |          |
|                      | 3.01080786147834e-37 | -0.188937520214416   | 5.00346258302951e-13 |                |          |
|                      | 2.22076762339079e-11 | -0.0830443052710139  | 0.00114300832834663  |                |          |
|                      | 0.00799233696019398  | -0.217109392752513   | .88120443298607e-16  |                |          |
|                      | 4.19897804593681e-14 | -0.204238903110247   | 8.04740927221761e-15 |                |          |
|                      | 1.63455787551341e-13 |                      |                      |                |          |
| ENSG00000150540      | 2                    | 137964020            | 138016364            | protein_coding | HNMT     |
| 52344                | -0.547813863787594   | 3.87434317697048e-43 |                      |                |          |
|                      | 5.74841831943078e-41 | -0.497946953219752   | .41589042806502e-37  |                |          |
|                      | 9.45657210523239e-36 | -0.172754481777442   | 8.86664896188461e-07 |                |          |
|                      | 1.0339335642006e-05  | -0.124431273117537   | 0.000382411354069523 |                |          |
|                      | 0.00337349178088851  | -0.202078044282194   | 1.48054057210941e-08 |                |          |
|                      | 2.87956823631616e-07 | -0.105526229919898   | 0.00242083045818917  |                |          |
|                      | 0.0072968394865036   |                      |                      |                |          |
| ENSG00000150687      | 11                   | 86791059             | 86952910             | protein_coding | PRSS23   |
| 161851               | -0.268933826659763   | 5.14191467042665e-05 |                      |                |          |
|                      | 0.000124465333515502 | -1.267920390519961   | .02840841478557e-57  |                |          |
|                      | 1.80017693190386e-55 | -0.490337372353867   | 4.6769422763713e-13  |                |          |
|                      | 2.08177382067396e-11 | -0.273074948702127   | 3.94384387649655e-05 |                |          |
|                      | 0.000544208536332504 | -0.393635419729083   | 5.65665378367069e-09 |                |          |
|                      | 1.23079621921516e-07 | -0.450206943188892   | .44717762921798e-11  |                |          |
|                      | 3.18767393692198e-10 |                      |                      |                |          |
| ENSG00000151090      | 3                    | 24117160             | 24495282             | protein_coding | THRB     |
| 378122               | -0.2937035630237     | 1.96094305705885e-28 |                      |                |          |
|                      | 5.72088612095876e-27 | -0.204463079460611   | 9.87278897357395e-16 |                |          |
|                      | 6.91583540554445e-15 | -0.174935662827449   | 3.01749012518572e-12 |                |          |
|                      | 1.19011338380426e-10 | -0.118998967243997   | 1.5171241845474e-06  |                |          |
|                      | 3.7575958141596e-05  | -0.0995113160838539  | 5.78006722227792e-05 |                |          |
|                      | 0.000417080441203649 | -0.150938724906555   | 1.29778983240009e-09 |                |          |
|                      | 1.33014919730007e-08 |                      |                      |                |          |
| ENSG00000152154      | 2                    | 39664982             | 39717963             | protein_coding | TMEM178A |
| 52981                | -0.481065659901992   | 1.92546485631213e-09 |                      |                |          |

|                      |                       |                           |
|----------------------|-----------------------|---------------------------|
| 7.92518282602027e-09 | -0.610037508081399    | 5.64417973363612e-14      |
| 3.39763045093961e-13 | -0.269225128545958    | 0.000573166425280948      |
| 0.00287487435268895  | -0.297778639795712    | 0.000154760212183232      |
| 0.00165705109663407  | -0.270368816137295    | 0.000608398317581683      |
| 0.00313330161639836  | -0.357051882783833    | 5.86685513902727e-06      |
| 3.21596281712612e-05 |                       |                           |
| ENSG00000153179      | 12 64507001 64697567  | protein_coding RASSF3     |
| 190566               | -0.087308427858158    | 0.00268680910501171       |
| 0.00507798120186551  | -0.413680307934144    | 3.23425166255668e-37      |
| 1.2441088061968e-35  | -0.193429538676866    | .77559411133901e-11       |
| 2.02216438047031e-09 | -0.150976815946773    | 2.92927524115143e-07      |
| 1.00184411387266e-05 | -0.209050269860644    | 3.41784702145248e-12      |
| 1.56607761021201e-10 | -0.178047622910889    | 1.65017107216487e-09      |
| 1.66935163202964e-08 |                       |                           |
| ENSG00000155111      | 6 110609978 110815958 | protein_coding CDK19      |
| 205980               | -0.312922171961088    | 6.6007708760876e-23       |
| 1.04718339591211e-21 | -0.380815943373357    | 1.86221056973491e-31      |
| 4.4978881342481e-30  | -0.138756037775498    | 3.52865395628631e-06      |
| 3.52164637956338e-05 | -0.140119527588428    | 3.15669290195372e-06      |
| 6.93626498159901e-05 | -0.152531372631184    | 4.6968179770266e-07       |
| 6.08749810849396e-06 | -0.128741011927991    | 1.66049445689075e-05      |
| 8.36908545580751e-05 |                       |                           |
| ENSG00000156218      | 15 83654086 84039842  | protein_coding ADAMTSL3   |
| 385756               | -0.376109084725472    | 1.68743208504161e-34      |
| 9.15975764908127e-33 | -0.247005410955396    | 1.62693944027288e-17      |
| 1.29581234867133e-16 | -0.224754792366064    | .35839949915e-15          |
| 2.7268877830224e-13  | -0.103908982960094    | 0.000189166941001945      |
| 0.00195167667143662  | -0.145964538973622    | 2.30979813076913e-07      |
| 3.27726275767325e-06 | -0.117566822459592    | 2.34850579073609e-05      |
| 0.000114693955215917 |                       |                           |
| ENSG00000157045      | 16 15037853 15056079  | protein_coding NTAN1      |
| 18226                | -0.339593627406263    | 4.56506213166521e-29      |
| 1.43096786618133e-27 | -0.603548934587889    | 8.55310798937355e-68      |
| 3.02838339469206e-65 | -0.212376656594403    | 1.37735991221704e-13      |
| 6.70559064763415e-12 | -0.265678465491077    | 1.61877061628693e-19      |
| 9.34030645597558e-17 | -0.280069569762108    | 3.90784807110099e-21      |
| 9.22429774237611e-19 | -0.220632169248853    | 1.8962673469221e-14       |
| 3.70664353797986e-13 |                       |                           |
| ENSG00000157227      | 14 22836557 22849027  | protein_coding MMP14      |
| 12470                | -0.151182065202823    | 1.24167091957536e-06      |
| 3.6923060232992e-06  | -0.513071032649179    | 4.56070555203538e-47      |
| 3.68141097384244e-45 | -0.167584003320862    | 7.44980569348542e-08      |
| 1.13631578313672e-06 | -0.135973330554952    | 1.21566405759437e-05      |
| 0.000211556399443247 | -0.124333177769881    | 6.5736883268715e-05       |
| 0.000464030314654876 | -0.288907738210811    | 3.90956596398364e-19      |
| 1.26889850318544e-17 |                       |                           |
| ENSG00000157379      | 14 24290598 24299833  | protein_coding DHRS1 9235 |
| -0.393211506968653   | 4.82977735404865e-22  | 6.96050891755078e-21      |
| -0.354094726813321   | 1.34772922712871e-18  | 1.1723212523416e-17       |
| -0.215677662147495   | 2.63987290804183e-08  | 4.49962582433081e-07      |
| -0.150626712266755   | 9.19086594774762e-05  | 0.00108720197873926       |
| -0.136919604733809   | 0.000390760150833044  | 0.00214505017259619       |
| -0.259142167174983   | .65971978456916e-11   | 4.65426730806554e-10      |



|                 |    |                      |                      |                |          |                      |
|-----------------|----|----------------------|----------------------|----------------|----------|----------------------|
| ENSG00000159335 | 12 | 6765516              | 6770952              | protein_coding | PTMS     | 5436                 |
|                 |    | -0.124633223994819   | 1.59060885402631e-05 |                |          | 4.12657707524994e-05 |
|                 |    | -0.586757698602236   | 3.53116859008929e-63 |                |          | 9.16867924416685e-61 |
|                 |    | -0.129373250673156   | .91246088841911e-06  |                |          | 6.32350136116743e-05 |
|                 |    | 0.20088924683766     | 8.85305390298201e-12 |                |          | 1.51562337092919e-09 |
|                 |    | 0.211794934385054    | 9.55963172358543e-13 |                |          | 5.13550009040474e-11 |
|                 |    | 0.303533368008562    | 1.83809826865451e-23 |                |          | 9.90855810635593e-22 |
| ENSG00000160305 | 21 | 46458899             | 46569852             | protein_coding | DIP2A    |                      |
|                 |    | 110953               | -0.253478758827495   |                |          | 5.04201788510141e-26 |
|                 |    | 1.12213709474278e-24 | -0.303530410249364   |                |          | 1.12056604273595e-34 |
|                 |    | 3.51253488526828e-33 | -0.131724463088783   |                |          | 5.83308307747654e-09 |
|                 |    | 1.1710515626805e-07  | -0.163979054289461   |                |          | 1.02212198114143e-12 |
|                 |    | 2.12315177922699e-10 | -0.161194480435141   |                |          | 2.86604152376196e-12 |
|                 |    | 1.33682817061939e-10 | -0.159063584498186   |                |          | 3.55114756160803e-12 |
|                 |    | 5.18008687849171e-11 |                      |                |          |                      |
| ENSG00000160310 | 21 | 46635167             | 46665124             | protein_coding | PRMT2    |                      |
|                 |    | 29957                | -0.0972376058667193  |                |          | 2.82061105241813e-07 |
|                 |    | 9.04534779448787e-07 | -0.343089934516393   |                |          | .16528320469928e-54  |
|                 |    | 4.40285241482233e-52 | -0.164972445583987   |                |          | 2.32620296018499e-17 |
|                 |    | 2.11929332846327e-15 | -0.117578075338526   |                |          | 7.31752872550492e-10 |
|                 |    | 7.05177830082248e-08 | -0.0782895183595764  |                |          | 3.42697687322681e-05 |
|                 |    | 0.000265271028175886 | -0.075287673683146   |                |          | 5.82461863491557e-05 |
|                 |    | 0.000261052168335298 |                      |                |          |                      |
| ENSG00000161010 | 5  | 179835133            | 179862173            | protein_coding | MRNIP    |                      |
|                 |    | 27040                | -0.215338537685333   |                |          | 5.35067450740578e-13 |
|                 |    | 3.16951171676329e-12 | -0.400177876047692   |                |          | 1.36084719399777e-35 |
|                 |    | 4.56910311105415e-34 | -0.158265613892236   |                |          | .0216632288018e-08   |
|                 |    | 9.39053968383416e-07 | -0.221179496313352   |                |          | 1.37944161685831e-13 |
|                 |    | 3.77023174544484e-11 | -0.209833925602561   |                |          | 2.24182177178332e-12 |
|                 |    | 1.08463793113703e-10 | -0.183230609465509   |                |          | 4.9141983427822e-10  |
|                 |    | 5.32394269695437e-09 |                      |                |          |                      |
| ENSG00000162267 | 3  | 52794768             | 52809009             | protein_coding | ITIH3    |                      |
|                 |    | 14241                | -0.352905107506306   |                |          | 4.98251958077297e-23 |
|                 |    | 8.01059572227678e-22 | -0.655978361585236   |                |          | 2.24725051400885e-59 |
|                 |    | 4.60656786286104e-57 | -0.279749894519789   |                |          | 8.05627724778371e-16 |
|                 |    | 5.60306889478671e-14 | -0.159016856625433   |                |          | 2.71045057986729e-06 |
|                 |    | 6.10203895718968e-05 | -0.310243367599437   |                |          | 1.81015559932068e-18 |
|                 |    | 2.82004140818168e-16 | -0.457024186921023   |                |          | 4.03390277728864e-35 |
|                 |    | 5.46471055368519e-33 |                      |                |          |                      |
| ENSG00000162909 | 1  | 223701593            | 223776018            | protein_coding | CAPN2    |                      |
|                 |    | 74425                | -0.182944687949653   |                |          | 5.22769423987924e-20 |
|                 |    | 6.24557120882505e-19 | -0.338337649080575   |                |          | 3.14445188557934e-52 |
|                 |    | 3.68326435529628e-50 | -0.112450840950326   |                |          | 4.72249054401884e-09 |
|                 |    | 9.71884810901842e-08 | -0.135368291646988   |                |          | 3.67692004044188e-12 |
|                 |    | 6.73914556588753e-10 | -0.118627326605809   |                |          | 1.02415886305646e-09 |
|                 |    | 2.73208406293777e-08 | -0.0571192592153862  |                |          | 0.00246863841916785  |
|                 |    | 0.00743167496274705  |                      |                |          |                      |
| ENSG00000162929 | 2  | 61065871             | 61138034             | protein_coding | KIAA1841 |                      |
|                 |    | 72163                | -0.126780194452921   |                |          | 0.000309148449378429 |
|                 |    | 0.000674706273445497 | -0.358061986128595   |                |          | 6.24105539730586e-22 |
|                 |    | 7.18090118424136e-21 | -0.106698125823579   |                |          | 0.00222808531505387  |
|                 |    | 0.00902765698913506  | -0.167033227003407   |                |          | 2.36834987890836e-06 |
|                 |    | 5.43395033335984e-05 | -0.236433823218189   |                |          | 5.60277478229779e-11 |



|                      |                      |                      |                      |                       |
|----------------------|----------------------|----------------------|----------------------|-----------------------|
| 1.95707686846227e-09 | -0.104389792236092   | 0.00280115574135687  |                      |                       |
| 0.008296426862091    |                      |                      |                      |                       |
| ENSG00000163069      | 4                    | 52020706             | 52038482             | protein_coding SGCB   |
| 17776                | -0.161663139877144   | 5.48491486843477e-11 |                      |                       |
| 2.64795440766487e-10 | -0.453737571509865   | 2.97864450144223e-56 |                      |                       |
| 4.68730330181499e-54 | -0.190212795950204   | 1.77350163632008e-14 |                      |                       |
| 9.97450613437923e-13 | -0.0922518159252474  | 0.000134758719260102 |                      |                       |
| 0.00148788524971873  | -0.152749226156145   | 6.12560681040667e-10 |                      |                       |
| 1.7102299014216e-08  | -0.091801458060135   | 0.000136318647816015 |                      |                       |
| 0.000557111283925943 |                      |                      |                      |                       |
| ENSG00000163293      | 4                    | 47914142             | 48040173             | protein_coding NIPAL1 |
| 126031               | -0.168576322590428   | 1.06041549732765e-07 |                      |                       |
| 3.57502987077849e-07 | -0.283553150443324   | 8.6858606867781e-18  |                      |                       |
| 4.05819702321732e-17 | -0.215818482754136   | 1.44449051123529e-11 |                      |                       |
| 4.88150058015933e-10 | -0.103259567896187   | 0.000973825832713625 |                      |                       |
| 0.00705967084590301  | -0.107782835915572   | 0.000614655292878131 |                      |                       |
| 0.00316030191674865  | -0.186127585908314   | 5.4652134349871e-09  |                      |                       |
| 4.28236130655178e-08 |                      |                      |                      |                       |
| ENSG00000163347      | 3                    | 190305701            | 190322475            | protein_coding CLDN1  |
| 16774                | -0.396385948345747   | 2.71956620648094e-27 |                      |                       |
| 7.01458972363685e-26 | -0.604444299805844   | 6.890601618523e-52   |                      |                       |
| 5.41117542677755e-50 | -0.133022360543558   | 9.00599994108894e-05 |                      |                       |
| 0.000593253585971351 | -0.183252816433518   | 1.0257656756149e-07  |                      |                       |
| 4.3425009403273e-06  | -0.311222503393883   | 2.3425828988386e-18  |                      |                       |
| 4.89189416486415e-16 | -0.323506451248388   | 9.30528933290893e-20 |                      |                       |
| 3.22866598034272e-18 |                      |                      |                      |                       |
| ENSG00000163631      | 4                    | 73397114             | 73421412             | protein_coding ALB    |
| 24298                | -0.859804587730252   | 7.27623159017637e-34 |                      |                       |
| 3.69239126851328e-32 | -0.562057841310953   | 5.49053519973428e-17 |                      |                       |
| 4.20950038763092e-16 | -0.277108764258656   | 1.71055145733382e-05 |                      |                       |
| 0.000139888090046213 | -0.289157069859798   | 1.5118428687634e-06  |                      |                       |
| 0.000153737651338071 | -0.378733806539802   | 8.30474195272772e-09 |                      |                       |
| 1.7250609984206e-07  | -0.528391211903447   | 1.8583209759463e-15  |                      |                       |
| 4.06612113543082e-14 |                      |                      |                      |                       |
| ENSG00000164344      | 4                    | 186208979            | 186258471            | protein_coding KLKB1  |
| 49492                | -0.639632108766916   | 2.99598469779584e-31 |                      |                       |
| 1.16686114017403e-29 | -0.576447020721928   | 1.79563202856041e-26 |                      |                       |
| 2.94464751294132e-25 | -0.275255911146005   | 5.89025388209148e-08 |                      |                       |
| 9.2040386388268e-07  | -0.182038248942102   | 0.000306740536408193 |                      |                       |
| 0.00283434805261165  | -0.376339101224727   | 5.00055021342607e-13 |                      |                       |
| 2.85361068772765e-11 | -0.354828127730593   | 5.16915613045639e-12 |                      |                       |
| 7.38132753037398e-11 |                      |                      |                      |                       |
| ENSG00000164402      | 5                    | 132750817            | 132807241            | protein_coding SEPT8  |
| 56424                | -0.140344789020136   | 6.90679406534229e-11 |                      |                       |
| 3.29457883478162e-10 | -0.342437499519605   | 1.04543668873036e-45 |                      |                       |
| 7.68248027062749e-44 | -0.110311979615577   | 1.91407340506813e-07 |                      |                       |
| 2.62263408773583e-06 | -0.0782893494958259  | 0.000204773806181535 |                      |                       |
| 0.00207019540980021  | -0.100987595675083   | 2.14303653220401e-06 |                      |                       |
| 2.35305515583612e-05 | -0.0988208477306145  | 2.89405653290041e-06 |                      |                       |
| 1.6821716720887e-05  |                      |                      |                      |                       |
| ENSG00000164764      | 8                    | 73064540             | 73124088             | protein_coding SBSPON |
| 59548                | -1.921481410531018   | 1.3570295151773e-51  | 3.16865290704237e-48 |                       |
| -2.242816373941058   | 0.03303895397727e-62 | 1.92533405944634e-59 | -                    |                       |
| 0.35717509344051     | 0.000707726240486074 | 0.00344875417595638  | -                    |                       |

|                    |                      |                      |                      |                      |            |
|--------------------|----------------------|----------------------|----------------------|----------------------|------------|
| 0.4384818828779473 | .98207602192877e-05  | 0.000548997896863968 | -                    |                      |            |
| 0.6949477894814561 | .78981317784066e-10  | 5.59909628465454e-09 | -                    |                      |            |
| 1.08413467893558   | 8.17910882902532e-22 | 3.651069812246e-20   |                      |                      |            |
| ENSG00000165948    | 14                   | 94081282             | 94103846             | protein_coding       | IFI27L1    |
|                    | 22564                | -0.208829232651402   | 5.20122061547718e-07 |                      |            |
|                    |                      | 1.61962454464359e-06 | -0.437627344513539   | 2.0151326465016e-23  |            |
|                    |                      | 2.60745444350901e-22 | -0.135995560539923   | 0.00090928189418126  |            |
|                    |                      | 0.00426292585899785  | -0.154077723088064   | 0.000189465519974505 |            |
|                    |                      | 0.00195191536768954  | -0.237558284184082   | 1.53887826038867e-08 |            |
|                    |                      | 2.9744645680639e-07  | -0.193376348735169   | 2.93638046718271e-06 |            |
|                    |                      | 1.70439162810132e-05 |                      |                      |            |
| ENSG00000166579    | 17                   | 8413131              | 8490411              | protein_coding       | NDEL1      |
|                    | 77280                | -0.0624062509042629  | 0.00173601128709323  |                      |            |
|                    |                      | 0.00338235615828233  | -0.244108243162227   | 1.67055953830523e-29 |            |
|                    |                      | 3.44254590572186e-28 | -0.0890212785517654  | 8.27959315449967e-06 |            |
|                    |                      | 7.41735375238357e-05 | -0.101908264457538   | 4.21414538836343e-07 |            |
|                    |                      | 1.35925819886778e-05 | -0.0912691662487495  | 6.00097203836966e-06 |            |
|                    |                      | 5.80317463598764e-05 | -0.175750321976968   | 2.28513794679879e-17 |            |
|                    |                      | 6.1379593229618e-16  |                      |                      |            |
| ENSG00000167081    | 9                    | 125747345            | 125967377            | protein_coding       | PBX3       |
|                    | 220032               | -0.321770448539168   | 3.12724531510431e-27 |                      |            |
|                    |                      | 8.03949748581024e-26 | -0.293279327821041   | 1.70009576809788e-23 |            |
|                    |                      | 2.21638426537212e-22 | -0.208071535487951   | 1.98547503966724e-13 |            |
|                    |                      | 9.43040111066341e-12 | -0.118192159870058   | 2.01278004970121e-05 |            |
|                    |                      | 0.000316099802361846 | -0.161687540098142   | 9.09695865458517e-09 |            |
|                    |                      | 1.86475682736556e-07 | -0.0862002900746557  | 0.00169410846172557  |            |
|                    |                      | 0.00532644111508025  |                      |                      |            |
| ENSG00000167315    | 18                   | 49782167             | 49813960             | protein_coding       | ACAA2      |
|                    | 31793                | -0.443534984125673   | 2.28650095916526e-27 |                      |            |
|                    |                      | 5.97674470517376e-26 | -0.582411654636148   | 7.19677016938157e-42 |            |
|                    |                      | 3.97583271165942e-40 | -0.116936238498397   | 0.00197922102694032  |            |
|                    |                      | 0.00815721808960405  | -0.280792284154556   | 6.72845025289222e-13 |            |
|                    |                      | 1.51916705057693e-10 | -0.363499322382188   | 1.312153507143e-19   |            |
|                    |                      | 2.43357612949771e-17 | -0.519965887784902   | 1.68536235216384e-35 |            |
|                    |                      | 2.36542883642887e-33 |                      |                      |            |
| ENSG00000168591    | 17                   | 44186970             | 44191731             | protein_coding       | TMUB2 4761 |
|                    |                      | -0.109245122645373   | 5.03374743002505e-12 | 2.70416383490897e-11 |            |
|                    |                      | -0.126008916336235   | 3.0169635200275e-15  | 2.02069108678024e-14 |            |
|                    |                      | -0.0584058527364277  | 0.000146770341818513 | 0.000902521574741577 |            |
|                    |                      | -0.0625649642505337  | 5.28781495137912e-05 | 0.000694594174768426 |            |
|                    |                      | -0.0791038837182514  | 4.27698723859284e-07 | 5.59846754383158e-06 |            |
|                    |                      | -0.0472984175523488  | 0.00205343124892552  | 0.00631597343080171  |            |
| ENSG00000168675    | 18                   | 13217498             | 13652755             | protein_coding       | LDLRAD4    |
|                    | 435257               | -0.696013027781754   | 1.92652010987825e-34 |                      |            |
|                    |                      | 1.03852099625582e-32 | -0.689682580181501   | 4.28401009799654e-34 |            |
|                    |                      | 1.29342235109861e-32 | -0.230971453778995   | 6.72460455057806e-06 |            |
|                    |                      | 6.17340096013291e-05 | -0.233171001875357   | 6.10232606036223e-06 |            |
|                    |                      | 0.000120798141924248 | -0.354436361737086   | 1.81383410462041e-11 |            |
|                    |                      | 7.06443037897034e-10 | -0.153781681235508   | 0.00253672438372076  |            |
|                    |                      | 0.00760870796572695  |                      |                      |            |
| ENSG00000169062    | 13                   | 114281584            | 114305817            | protein_coding       | UPF3A      |
|                    | 24233                | -0.146693773927553   | 9.10819822709212e-15 |                      |            |
|                    |                      | 6.33467054374411e-14 | -0.168367795937941   | 1.39653864576872e-18 |            |
|                    |                      | 1.21410019879637e-17 | -0.0585640510320085  | 0.0012800668918351   |            |

|                 |                      |                     |                      |                |          |
|-----------------|----------------------|---------------------|----------------------|----------------|----------|
|                 | 0.00567829217195302  | -0.0932251740719066 | 4.44967641946801e-07 |                |          |
|                 | 1.4176177697115e-05  | -0.103115052137738  | 3.02237375581922e-08 |                |          |
|                 | 5.38736392928004e-07 | -0.0619174292968463 | 0.000677731872808608 |                |          |
|                 | 0.00235363014857006  |                     |                      |                |          |
| ENSG00000169410 | 15                   | 75463251            | 75579289             | protein_coding | PTPN9    |
|                 | 116038               | -0.185703599096562  | 3.73227887824859e-21 |                |          |
|                 | 4.94852533142423e-20 | -0.225670554886619  | 4.67764558941412e-29 |                |          |
|                 | 9.28318989012518e-28 | -0.0832133530717707 | 8.05779501252819e-06 |                |          |
|                 | 7.24782843534508e-05 | -0.0806214782806185 | 1.64211667450189e-05 |                |          |
|                 | 0.000268724114202363 | -0.109087270514201  | 9.13469456333005e-09 |                |          |
|                 | 1.87003162420656e-07 | -0.0764028918157411 | 4.06937761294067e-05 |                |          |
|                 | 0.000188344723208564 |                     |                      |                |          |
| ENSG00000169432 | 2                    | 166195185           | 166375993            | protein_coding | SCN9A    |
|                 | 180808               | -0.675155903751874  | 4.00802636095262e-34 |                |          |
|                 | 2.09533700259332e-32 | -0.911314240872932  | 1.95525162760327e-53 |                |          |
|                 | 2.49679222183863e-51 | -0.283996976774676  | 2.13488628955026e-08 |                |          |
|                 | 3.73701050616894e-07 | -0.291820455402581  | 1.05099769176765e-08 |                |          |
|                 | 6.76590621489593e-07 | -0.380321438420343  | 2.57296433795724e-13 |                |          |
|                 | 1.61629884762241e-11 | -0.159447747703375  | 0.00142127439127158  |                |          |
|                 | 0.0045540999057219   |                     |                      |                |          |
| ENSG00000169507 | 2                    | 164896186           | 164955525            | protein_coding | SLC38A11 |
|                 | 59339                | -0.578167807464836  | 3.1523323192335e-18  |                |          |
|                 | 3.09258093207423e-17 | -0.543225862434397  | 1.61540959649715e-16 |                |          |
|                 | 1.19442174199473e-15 | -0.222812491461589  | 0.000399208365192431 |                |          |
|                 | 0.0021218925695438   | -0.243201103843525  | 0.000123464878560522 |                |          |
|                 | 0.00138179550509653  | -0.248116998190979  | 6.983912169902e-05   |                |          |
|                 | 0.000651255330902975 | -0.365063235138671  | 1.17780995523809e-08 |                |          |
|                 | 1.05515246076217e-07 |                     |                      |                |          |
| ENSG00000169903 | 3                    | 149473974           | 149503281            | protein_coding | TM4SF4   |
|                 | 29307                | -0.372870639011387  | 3.51437035823543e-18 |                |          |
|                 | 3.41762645511547e-17 | -0.296636323023081  | 1.95703225309713e-12 |                |          |
|                 | 1.02413857813236e-11 | -0.177223580940499  | 1.58411497253897e-05 |                |          |
|                 | 0.000130576334164998 | -0.130979219008713  | 0.00140817982306178  |                |          |
|                 | 0.00936322384271427  | -0.280075623786839  | 3.16654137395993e-11 |                |          |
|                 | 1.17456066821242e-09 | -0.295805470938912  | 1.6935222367733e-12  |                |          |
|                 | 2.56647693839409e-11 |                     |                      |                |          |
| ENSG00000170017 | 3                    | 105366909           | 105576900            | protein_coding | ALCAM    |
|                 | 209991               | -0.188932037240671  | 5.26137430447257e-14 |                |          |
|                 | 3.42671196861949e-13 | -0.307901642897582  | 4.08728347278093e-31 |                |          |
|                 | 9.5753066499931e-30  | -0.196962894215726  | 4.00086702276111e-15 |                |          |
|                 | 2.51328658659658e-13 | -0.100974961156301  | 3.57215206455066e-05 |                |          |
|                 | 0.0005022613448884   | -0.194396939628717  | 1.4581938451455e-14  |                |          |
|                 | 1.17705709396485e-12 | -0.103613597476393  | 2.04968430411613e-05 |                |          |
|                 | 0.000101371529440715 |                     |                      |                |          |
| ENSG00000170035 | 2                    | 180967248           | 181076585            | protein_coding | UBE2E3   |
|                 | 109337               | -0.128664017385929  | 5.5090596621072e-08  |                |          |
|                 | 3.23745787744989e-07 | -0.297080071118438  | 2.2228849294835e-30  |                |          |
|                 | 4.91776028858555e-29 | -0.190505542277752  | 8.45063904532899e-15 |                |          |
|                 | 5.02490479722062e-13 | -0.0772814021736812 | 0.00117294517858694  |                |          |
|                 | 0.0081431875834251   | -0.0938972366626087 | 9.12940037655948e-05 |                |          |
|                 | 0.000619185583223423 | -0.122813197899372  | 3.04950510182182e-07 |                |          |
|                 | 2.1496941168001e-06  |                     |                      |                |          |
| ENSG00000170558 | 18                   | 27950966            | 28177446             | protein_coding | CDH2     |
|                 | 226480               | -0.332901249819835  | 1.73671753833252e-25 |                |          |

|                      |                       |                           |
|----------------------|-----------------------|---------------------------|
| 3.64149697573114e-24 | -0.570919096901014    | 7.05563650223116e-58      |
| 1.26344552952022e-55 | -0.263918912451737    | 1.49506119139468e-17      |
| 1.38640227980582e-15 | -0.184762771116506    | 1.11765693899519e-09      |
| 9.79955247417364e-08 | -0.198892457282208    | 7.9252833986312e-11       |
| 2.6325797455709e-09  | -0.152131547654197    | 3.79457578779923e-07      |
| 2.64027227325253e-06 |                       |                           |
| ENSG00000170608      | 19 45863989 45873797  | protein_coding FOXA3 9808 |
| -0.175886629676806   | 4.90654970850184e-06  | 1.35722901116389e-05      |
| -0.554828749886724   | 2.52177123534219e-38  | 1.05044583089294e-36      |
| -0.446584012952142   | 1.89574024790025e-27  | 5.79092888667412e-25      |
| -0.141973019492258   | 0.000208704563608108  | 0.00209228339539943       |
| -0.213275726476953   | 4.19509457467763e-08  | 7.16615990996741e-07      |
| -0.259647142177608   | 2.8863516370343e-11   | 3.72547408064269e-10      |
| ENSG00000171552      | 20 31664452 31723989  | protein_coding BCL2L1     |
| 59537                | -0.077033696388324    | 0.00104681781945261       |
| 0.00211002391114662  | -0.297088780558254    | 4.75867593997955e-31      |
| 1.1081526527495e-29  | -0.0898180290587645   | 0.000128335080849492      |
| 0.000805532725444895 | -0.105354874809471    | 8.38403161822496e-06      |
| 0.000157177892395098 | -0.147845501108303    | 8.01390449260916e-10      |
| 2.17885895445651e-08 | -0.0933934438875337   | 6.89602138886644e-05      |
| 0.000302969873708828 |                       |                           |
| ENSG00000171766      | 15 45361124 45402327  | protein_coding GATM       |
| 41203                | -0.367972307581098    | 2.97660783486688e-18      |
| 2.93126254484141e-17 | -0.422558194691158    | 6.72503591202089e-23      |
| 8.33487147759534e-22 | -0.194281387657623    | 1.64522696658363e-06      |
| 1.78364585333377e-05 | -0.171706508699472    | 3.33483969932318e-05      |
| 0.000355219410896053 | -0.242992255814041    | 3.89826942030479e-09      |
| 8.7888768884122e-08  | -0.234548877090479    | 8.93013309748323e-09      |
| 8.08851997242391e-08 |                       |                           |
| ENSG00000171943      | 1 121184810 121392822 | protein_coding SRGAP2C    |
| 208012               | -0.475555695283974    | 2.58922237506906e-24      |
| 4.84243642031224e-23 | -0.506417028069685    | 5.18244397272799e-27      |
| 9.37499776064514e-26 | -0.148220329809425    | 0.000642859980130666      |
| 0.0031693403893847   | -0.157253140104801    | 0.000318712087648242      |
| 0.00291728296913747  | -0.183344296940183    | 1.0278942739985e-05       |
| 0.000242906314017398 | -0.163293479186552    | 0.00017875493850187       |
| 0.000709870809819176 |                       |                           |
| ENSG00000172845      | 2 173906459 173965702 | protein_coding SP3        |
| 59243                | -0.295457595668593    | 1.37946190095454e-27      |
| 3.69254930497779e-26 | -0.391977813456547    | 7.39899700689296e-43      |
| 4.36624902918127e-41 | -0.149136498723541    | 4.6356331694906e-09       |
| 9.60352781216676e-08 | -0.129299700358102    | 3.6498365605037e-07       |
| 1.19959501637315e-05 | -0.186656899141635    | 7.07069128357135e-13      |
| 3.90618083357298e-11 | -0.118394062078265    | 2.7257578511263e-06       |
| 1.59401582442555e-05 |                       |                           |
| ENSG00000172995      | 3 35638945 35794496   | protein_coding ARPP21     |
| 155551               | -0.437778449534213    | 4.29556969548533e-12      |
| 2.32605770893173e-11 | -0.903463500089682    | 1.50461037127912e-38      |
| 6.38700952974317e-37 | -0.609998958523962    | 5.39093423211599e-21      |
| 8.31538261407277e-19 | -0.214987351280135    | 0.000459844042047878      |
| 0.00391036335812866  | -0.458437058909622    | 5.48512204283849e-13      |
| 3.09611290961525e-11 | -0.650241679543312    | 3.7431321808812e-23       |
| 1.92456291240753e-21 |                       |                           |

|                      |                    |                      |                      |                      |         |
|----------------------|--------------------|----------------------|----------------------|----------------------|---------|
| ENSG00000174233      | 12                 | 48766194             | 48789037             | protein_coding       | ADCY6   |
| 22843                | -0.178097836510942 |                      | 3.31587586168341e-23 |                      |         |
| 5.42056978480229e-22 |                    | -0.301097871377618   |                      | 2.74772241782567e-52 |         |
| 3.24293693540197e-50 |                    | -0.0879514767854541  |                      | 2.23110253194317e-07 |         |
| 2.99899450777763e-06 |                    | -0.0777553335586614  |                      | 4.7417331037787e-06  |         |
| 9.73757661002237e-05 |                    | -0.0994107234339028  |                      | 7.7833267377163e-09  |         |
| 1.63298889303289e-07 |                    | -0.117667460101904   |                      | 8.45962279192385e-12 |         |
| 1.1735749196383e-10  |                    |                      |                      |                      |         |
| ENSG00000174652      | 19                 | 9412598              | 9435578              | protein_coding       | ZNF266  |
| 22980                | -0.142702131963842 |                      | 3.25432556128024e-10 |                      |         |
| 1.45561693709976e-09 |                    | -0.212774390887368   |                      | 9.14440616007239e-20 |         |
| 8.78844562416828e-19 |                    | -0.0674906484570421  |                      | 0.00227486339613228  |         |
| 0.00919566602188498  |                    | -0.0799676013946815  |                      | 0.000330699856839889 |         |
| 0.00300757330397468  |                    | -0.0808242363643972  |                      | 0.000302966548146962 |         |
| 0.00172448514928079  |                    | -0.0725789052287924  |                      | 0.00105759935091116  |         |
| 0.00349445181078368  |                    |                      |                      |                      |         |
| ENSG00000174827      | 1                  | 145670852            | 145708148            | protein_coding       | PDZK1   |
| 37296                | -0.505132066122956 |                      | 3.37032146680052e-27 |                      |         |
| 8.62171397886458e-26 |                    | -0.619247636249307   |                      | 1.61796590793268e-37 |         |
| 6.41381447320184e-36 |                    | -0.153437253530710   |                      | 0.000380693748782167 |         |
| 0.00203878580690182  |                    | -0.185966108633318   |                      | 1.96170828729435e-05 |         |
| 0.000309953888516822 |                    | -0.330058751439613   |                      | 1.94620874880006e-13 |         |
| 1.24773605339737e-11 |                    | -0.178239120360367   |                      | 3.91996812114217e-05 |         |
| 0.000182350502715061 |                    |                      |                      |                      |         |
| ENSG00000175155      | 17                 | 59331689             | 59401729             | protein_coding       | YPEL2   |
| 70040                | -0.692393669165964 |                      | 4.34442161872529e-37 |                      |         |
| 3.11897439622679e-35 |                    | -0.929617718504224   |                      | 3.29897205867519e-57 |         |
| 5.52631029054847e-55 |                    | -0.152287539617713   |                      | 0.00169598554581848  |         |
| 0.0071759258061668   |                    | -0.245353776957143   |                      | 6.32649528851907e-07 |         |
| 1.88092500190532e-05 |                    | -0.380178576577755   |                      | 7.9580516096266e-14  |         |
| 4.29965945726844e-12 |                    | -0.302879454950082   |                      | 9.43482556374633e-10 |         |
| 9.85815878320618e-09 |                    |                      |                      |                      |         |
| ENSG00000176444      | 1                  | 155262868            | 155278491            | protein_coding       | CLK2    |
| 15623                | -0.124633995374382 |                      | 2.5644560498839e-13  | 1.38835569036785e-12 |         |
|                      | -0.107742566875581 |                      | 5.1900906311982e-10  | 6.60101595379182e-10 | -       |
| 0.0618799299148129   |                    | 0.000169056304133425 |                      | 0.00102122069100218  | -       |
| 0.0556165633179244   |                    | 0.000747466784414205 |                      | 0.00570822795803377  | -       |
| 0.0626171792755681   |                    | 0.000161857746878658 |                      | 0.00101065404353611  | -       |
| 0.0876380478481416   |                    | 1.35655271908791e-07 |                      | 1.02144682506866e-06 |         |
| ENSG00000177426      | 18                 | 3411608              | 3459978              | protein_coding       | TGIF1   |
| 48370                | -0.140482158974358 |                      | 3.90164744191741e-06 |                      |         |
| 1.09127047572049e-05 |                    | -0.334387125384856   |                      | 4.3478292606814e-25  |         |
| 6.46942044433196e-24 |                    | -0.149165602464588   |                      | 8.647267217452e-07   |         |
| 1.0339335642006e-05  |                    | -0.104324136500216   |                      | 0.0005575514770968   |         |
| 0.00454186901271001  |                    | -0.118134523370428   |                      | 0.000103345755693718 |         |
| 0.000688044242714717 |                    | -0.176447806550028   |                      | 7.84153723647106e-09 |         |
| 7.16080355257812e-08 |                    |                      |                      |                      |         |
| ENSG00000178075      | 3                  | 113828182            | 113947174            | protein_coding       | GRAMD1C |
| 118992               | -0.616950638969791 |                      | 6.59405384971104e-38 |                      |         |
| 5.40677710129728e-36 |                    | -0.355921328273778   |                      | 1.14649387576855e-15 |         |
| 7.99875866126208e-15 |                    | -0.214003409837543   |                      | 6.51305943794129e-07 |         |
| 7.83528594468628e-06 |                    | -0.145813774848278   |                      | 0.000659392929250456 |         |
| 0.00520663073735066  |                    | -0.288712403776092   |                      | 5.32871123635416e-11 |         |

|                      |                      |                       |                      |                        |
|----------------------|----------------------|-----------------------|----------------------|------------------------|
| 1.88672709889003e-09 | -0.153139528577011   | 0.000333109999650913  |                      |                        |
| 0.00124240380286368  |                      |                       |                      |                        |
| ENSG00000178234      | 7                    | 152025674             | 152122347            | protein_coding GALNT11 |
| 96673                | -0.316841695123366   | .33773390527696e-39   | 5.91230877307244e-37 |                        |
| -0.233891158900413   | .81935082596237e-24  | 5.26563420510334e-23  | -                    |                        |
| 0.0898909587813135   | 3.25049187272702e-05 | 0.000246180908532884  | -                    |                        |
| 0.0786930368767180   | .000282206009348623  | 0.00267589009107863   | -                    |                        |
| 0.0777349335715378   | 0.000353567708217169 | 0.00196652314398975   | -                    |                        |
| 0.0885009632302118   | 4.34220226611435e-05 | 0.000200198783970984  |                      |                        |
| ENSG00000180998      | 14                   | 52553148              | 52637713             | protein_coding GPR137C |
| 84565                | -0.442184828049985   | 7.60255253117561e-12  |                      |                        |
| 3.99865516148497e-11 | -0.725618735010753   | 1.33412272234894e-26  |                      |                        |
| 2.2110955203696e-25  | -0.421853967158226   | 4.67664262371267e-11  |                      |                        |
| 1.43986987025335e-09 | -0.522909505222447   | 1.48780657166621e-15  |                      |                        |
| 5.03881273477997e-13 | -0.332945349661062   | 1.79024994795945e-07  |                      |                        |
| 2.61880788162068e-06 | -0.392270460753307   | 8.6726854971719e-10   |                      |                        |
| 9.09979389881556e-09 |                      |                       |                      |                        |
| ENSG00000182197      | 8                    | 117794490             | 118111853            | protein_coding EXT1    |
| 317363               | -0.121783926494362   | 7.219345679622261e-05 |                      |                        |
| 0.000171605410959476 | -0.536923695298657   | 4.2031747594184e-51   |                      |                        |
| 4.45450745421628e-49 | -0.196543591165892   | .47914392680769e-10   |                      |                        |
| 6.51308317634687e-09 | -0.154751737846749   | 5.40965457257726e-07  |                      |                        |
| 1.64603532394885e-05 | -0.226429948578985   | 7.72659807136605e-13  |                      |                        |
| 4.20883466272069e-11 | -0.309430489288414   | 8.00368257212564e-22  |                      |                        |
| 3.58302789629728e-20 |                      |                       |                      |                        |
| ENSG00000182983      | 3                    | 42905731              | 42917641             | protein_coding ZNF662  |
| 11910                | -0.520737710568215   | 1.92968549843378e-19  |                      |                        |
| 2.17215103902455e-18 | -0.723375758549952   | 4.97860152178509e-33  |                      |                        |
| 1.37277226739628e-31 | -0.195628972145335   | 0.000341801638923435  |                      |                        |
| 0.00186056175149832  | -0.216721363352303   | 8.12633325466832e-05  |                      |                        |
| 0.000987520637866442 | -0.233000799303444   | 2.5220399525051e-05   |                      |                        |
| 0.000201285145594656 | -0.378458942458457   | 1.46184927779343e-11  |                      |                        |
| 1.96667961129049e-10 |                      |                       |                      |                        |
| ENSG00000183508      | 1                    | 117605934             | 117628372            | protein_coding FAM46C  |
| 22438                | -0.349219000869068   | 3.65733137012935e-11  |                      |                        |
| 1.78837305132596e-10 | -0.457142939647253   | 1.83851514595988e-17  |                      |                        |
| 1.45836188690982e-16 | -0.230076858944568   | .20989747971196e-06   |                      |                        |
| 7.37187278596153e-05 | -0.199063515549523   | 0.000115218242645226  |                      |                        |
| 0.00131006781022131  | -0.181068783469216   | 0.000458359074973033  |                      |                        |
| 0.00246063956891967  | -0.487132255761076   | 2.27480398495026e-19  |                      |                        |
| 7.58868764058673e-18 |                      |                       |                      |                        |
| ENSG00000183801      | 11                   | 7485388               | 7511377              | protein_coding OLFML1  |
| 25989                | -1.278092164064982   | .62639758637258e-41   | 3.22178330693688e-39 |                        |
| -1.579993411804126   | .31183833327168e-56  | 9.64040484255289e-54  | -                    |                        |
| 0.7006453636550364   | .45954637878092e-16  | 3.32417574330277e-14  | -                    |                        |
| 0.3466395012972743   | .19311208083126e-05  | 0.00045679975305115   | -                    |                        |
| 0.57867258535709     | 1.35839287319877e-11 | 5.4262570696317e-10   | -                    |                        |
| 0.8179398188680161   | .14177642805553e-20  | 4.34753466697144e-19  |                      |                        |
| ENSG00000184226      | 13                   | 66302834              | 67230445             | protein_coding PCDH9   |
| 927611               | -1.081044717843372   | .59997170530214e-39   |                      |                        |
| 2.56360501246216e-37 | -1.012173962232841   | .06106897707102e-35   |                      |                        |
| 3.62508631442751e-34 | -0.537536716630044   | 6.0938463925136e-13   |                      |                        |
| 2.65927263162379e-11 | -0.250778165827064   | 0.000571515694011378  |                      |                        |
| 0.00462767307536552  | -0.475074197024323   | 2.1185190091592e-10   |                      |                        |



|                      |                      |                      |                      |                           |
|----------------------|----------------------|----------------------|----------------------|---------------------------|
| 6.45177264765908e-09 | -0.257007264348334   | 0.000395907902443021 |                      |                           |
| 0.00144989403200748  |                      |                      |                      |                           |
| ENSG00000184887      | 14                   | 105248490            | 105251093            | protein_coding BTBD6 2603 |
| -0.086318953280669   |                      | 3.04584665252969e-05 | 7.62391468505142e-05 |                           |
| -0.246181126634415   |                      | 2.25246503820892e-28 | 4.30566292395788e-27 |                           |
| -0.106149822883119   |                      | 3.04420492888266e-07 | 3.95543524495938e-06 |                           |
| -0.0877581493458477  |                      | 2.25419331487662e-05 | 0.000345990912832147 |                           |
| -0.142295306981056   |                      | 1.90833834693432e-11 | 7.37717198682127e-10 |                           |
| -0.127030705637818   |                      | 1.23279355477691e-09 | 1.26770236236762e-08 |                           |
| ENSG00000185482      | 12                   | 57243453             | 57251193             | protein_coding STAC3 7740 |
| -0.389366897131121   |                      | 2.83875507004322e-11 | 1.40441299575114e-10 |                           |
| -0.410838883528707   |                      | 2.41939542687648e-12 | 1.25764969487183e-11 |                           |
| -0.220219893981611   |                      | 0.00011082743654558  | 0.000712873919877618 |                           |
| -0.227169899891903   |                      | 7.3194221935167e-05  | 0.000910776983648536 |                           |
| -0.298709391468187   |                      | 2.57633975335568e-07 | 3.61267299887741e-06 |                           |
| -0.418690774121039   |                      | 0.08014530404263e-13 | 1.44346513971102e-11 |                           |
| ENSG00000185924      | 17                   | 1934677              | 2025345              | protein_coding RTN4RL1    |
| 90668                | -0.732611560651214   | 2.70869764921285e-19 |                      |                           |
| 3.00347335779979e-18 |                      | -1.384953042261593   | 0.08792364783402e-51 |                           |
| 3.29498373353467e-49 |                      | -0.291270150153542   | 0.00015373169078801  |                           |
| 0.000941055406988765 |                      | -0.362075127711376   | 3.26409197675486e-06 |                           |
| 7.1320180793638e-05  |                      | -0.480577654387693   | 1.25221446815706e-09 |                           |
| 3.25680287135541e-08 |                      | -0.785983669325642   | 9.09434557963331e-22 |                           |
| 4.02502300525873e-20 |                      |                      |                      |                           |
| ENSG00000186205      | 1                    | 220786759            | 220819657            | protein_coding MARC1      |
| 32898                | -0.613933014907351   | 2.1006003252907e-34  |                      |                           |
| 1.1245791226015e-32  |                      | -0.514285050538086   | 4.80294863837489e-26 |                           |
| 7.61191626014674e-25 |                      | -0.263284249475364   | 9.34692563906612e-09 |                           |
| 1.79109169164835e-07 |                      | -0.259891330461181   | 1.64535147143249e-08 |                           |
| 9.82261250344446e-07 |                      | -0.299943643403104   | 1.17895717903669e-10 |                           |
| 3.81057549630968e-09 |                      | -0.360100895352259   | 1.38302037168079e-14 |                           |
| 2.74822377173661e-13 |                      |                      |                      |                           |
| ENSG00000187634      | 1                    | 923928               | 944581               | protein_coding SAMD11     |
| 20653                | -1.251813639664552   | 2.22085545473175e-24 | 4.18364052349043e-23 |                           |
| -2.178760738363511   | 1.2476048692136e-54  | 1.62246700238407e-52 | -                    |                           |
| 1.24698672910471     | 1.74115841066754e-24 | 4.0485831163865e-22  | -                    |                           |
| 0.4934123962079571   | 1.59186983194994e-05 | 0.00026160063409228  | -                    |                           |
| 0.3609002339543260   | 0.00143520281905948  | 0.00651676616675244  | -                    |                           |
| 0.8611780060081942   | 1.9739953901365e-13  | 3.78686807724487e-12 | -                    |                           |
| ENSG00000187758      | 4                    | 99276367             | 99291028             | protein_coding ADH1A      |
| 14661                | -1.446064470184591   | 1.4644055369091e-37  | 1.13502357509984e-35 |                           |
| -1.583959631182013   | 1.41947347289388e-43 | 2.09732193835487e-41 | -                    |                           |
| 1.17880554429207     | 1.71502170062498e-27 | 5.34366461480731e-25 | -                    |                           |
| 0.5760866246045      | 1.81441653666164e-08 | 1.05475190815284e-06 | -                    |                           |
| 0.8033468473525711   | 1.83087741372611e-14 | 1.45526730757342e-12 | -                    |                           |
| 1.20334591286096     | 2.21293330414671e-28 | 1.80498889765977e-26 | -                    |                           |
| ENSG00000187837      | 6                    | 26055787             | 26056428             | protein_coding HIST1H1C   |
| 641                  | -0.156066829013973   | 1.88344549518862e-06 | 1.08656963666565e-05 |                           |
| -0.731434398393118   |                      | 9.52281182358499e-69 | 3.70889713499077e-66 |                           |
| -0.332772429599014   |                      | 4.02928828848522e-21 | 6.40533492309298e-19 |                           |
| -0.461866167867831   |                      | 1.95527935331115e-35 | 4.35161386360491e-32 |                           |
| 0.3316439762547321   | 1.12016795309325e-20 | 2.49301379160567e-18 | -                    |                           |
| 0.2828763019622773   | 1.81607861612417e-16 | 9.00768011524219e-15 | -                    |                           |



|                      |                     |                      |                      |                       |          |
|----------------------|---------------------|----------------------|----------------------|-----------------------|----------|
| ENSG00000189077      | 7                   | 75986837             | 75994659             | protein_coding        | TMEM120A |
| 7822                 | -0.0923647239874796 |                      | 4.39037674779356e-05 |                       |          |
| 0.000107408416070785 |                     | -0.218871263482169   |                      | 2.68141587330998e-20  |          |
| 2.68814529538586e-19 |                     | -0.104420715016856   |                      | 3.72111975277161e-06  |          |
| 3.678383542413e-05   |                     | -0.150693349555433   |                      | 5.89135598021367e-11  |          |
| 8.19477096569186e-09 |                     | -0.221304566303401   |                      | 1.68441443565522e-20  |          |
| 3.69598485817926e-18 |                     | -0.356120505449525   |                      | 4.36148682307272e-44  |          |
| 1.06168130026015e-41 |                     |                      |                      |                       |          |
| ENSG00000196141      | 2                   | 200305881            | 200482263            | protein_coding        | SPATS2L  |
| 176382               | -0.163633922339756  |                      | 4.5155510221545e-19  |                       |          |
| 4.85827136561774e-18 |                     | -0.184171798330212   |                      | 3.78599854169971e-23  |          |
| 4.79919213027988e-22 |                     | -0.207393466608995   |                      | 2.76535132980349e-28  |          |
| 9.36552355804535e-26 |                     | -0.096245144883734   |                      | 5.46222025018206e-08  |          |
| 2.55543331163923e-06 |                     | -0.156645922897528   |                      | 1.34158801815275e-17  |          |
| 1.77123726566117e-15 |                     | -0.140005574298253   |                      | 7.39258674154127e-15  |          |
| 1.51140562790645e-13 |                     |                      |                      |                       |          |
| ENSG00000196660      | 1                   | 219685427            | 219958647            | protein_coding        | SLC30A10 |
| 273220               | -0.606716696856643  |                      | 1.28319674883118e-23 |                       |          |
| 2.18578618367601e-22 |                     | -0.510186555734697   |                      | 8.84383043250507e-18  |          |
| 7.22485759349746e-17 |                     | -0.199456713680560   |                      | 0.000428404291360293  |          |
| 0.0022524841225454   |                     | -0.235344780715952   |                      | 3.74236054206835e-05  |          |
| 0.000521486895213621 |                     | -0.325687226807125   |                      | 1.90725606717985e-08  |          |
| 3.60596386779063e-07 |                     | -0.249834331821146   |                      | 1.13591015852891e-05  |          |
| 5.89288856467597e-05 |                     |                      |                      |                       |          |
| ENSG00000197622      | 1                   | 151050971            | 151070325            | protein_coding        | CDC42SE1 |
| 19354                | -0.0940707626647352 |                      | 7.26717229963854e-05 |                       |          |
| 0.000172663225950997 |                     | -0.224692334066935   |                      | 1.41565426781466e-19  |          |
| 1.33988322225301e-18 |                     | -0.0966561149499565  |                      | 4.25960363008126e-05  |          |
| 0.000311258747434503 |                     | -0.076677698877929   |                      | 0.00117099901348626   |          |
| 0.00813330077177996  |                     | -0.128095277119441   |                      | 9.76818890921416e-08  |          |
| 1.53560660965335e-06 |                     | -0.108995382041036   |                      | 4.24808208176901e-06  |          |
| 2.39006394914696e-05 |                     |                      |                      |                       |          |
| ENSG00000197694      | 9                   | 128552558            | 128633662            | protein_coding        | SPTAN1   |
| 81104                | -0.252844491216436  |                      | 3.48663935971081e-20 |                       |          |
| 4.23369872057169e-19 |                     | -0.378783952154604   |                      | 1.66840196863697e-38  |          |
| 7.02487412686362e-37 |                     | -0.153500565801714   |                      | 6.04565957987117e-09  |          |
| 1.20595813821784e-07 |                     | -0.149014165309767   |                      | 1.8347632525157e-08   |          |
| 1.05475190815284e-06 |                     | -0.188192736153743   |                      | 2.81019060719063e-12  |          |
| 1.31471349758027e-10 |                     | -0.271454954823925   |                      | 7.03805068798029e-23  |          |
| 3.49190419324984e-21 |                     |                      |                      |                       |          |
| ENSG00000197822      | 5                   | 69492292             | 69558104             | protein_coding        | OCN      |
| 65812                | -0.392081575780191  |                      | 9.3640424795527e-24  | 3.6789319242555e-23   |          |
|                      | -0.184448081411093  |                      | 8.3798981202945e-07  | 1.19608008164847e-06  | -        |
| 0.1174949734829710   |                     | 0.00102997409487679  |                      | 0.00473332342893376   | -        |
| 0.1438648045754946   |                     | 7.2343639351655e-05  |                      | 0.000851580614427597  | -        |
| 0.1237506234866220   |                     | 0.000620317572262022 |                      | 0.00318731116697561   | -        |
| 0.21505384619556     |                     | 3.54696578141056e-09 |                      | 3.39007238703037e-08  |          |
| ENSG00000198515      | 4                   | 47935977             | 48016672             | protein_coding        | CNGA1    |
| 80695                | -0.744587095204943  |                      | 1.22456305451295e-34 |                       |          |
| 6.74115470892481e-33 |                     | -0.523078370586683   |                      | 6.63342165660994e-20  |          |
| 6.46696345358738e-19 |                     | -0.342336019067773   |                      | 5.57606240830254e-10  |          |
| 1.37451702941369e-08 |                     | -0.273740541674218   |                      | 6.15309077036549e-07  |          |
| 1.83637933163839e-05 |                     | -0.206146242773568   |                      | 0.0001623817111983399 |          |

|                 |                      |                      |                      |                      |            |
|-----------------|----------------------|----------------------|----------------------|----------------------|------------|
|                 | 0.00101311361273103  | -0.323398537844642   | 4.64908206974069e-09 |                      |            |
|                 | 4.37103497673448e-08 |                      |                      |                      |            |
| ENSG00000198561 | 11                   | 57753243             | 57819546             | protein_coding       | CTNND1     |
|                 | 66303                | -0.171590126589672   | 3.4156416746233e-20  | 2.88145562123978e-19 |            |
|                 | -0.304865505418405   | 4.81863386442656e-50 | 4.81214724191676e-48 |                      |            |
|                 | -0.0956453954792291  | 7.19778194016489e-08 | 1.10151517530284e-06 |                      |            |
|                 | -0.113076454584737   | 3.14405252178044e-10 | 3.2975613053106e-08  |                      |            |
|                 | -0.0795523580725384  | 8.06060094782582e-06 | 7.44816738826681e-05 |                      |            |
|                 | -0.0941382268389557  | 1.11665681201045e-07 | 8.50263757297691e-07 |                      |            |
| ENSG00000198730 | 11                   | 10750987             | 10779743             | protein_coding       | CTR9       |
|                 | 28756                | -0.121923627295082   | 1.98882615636824e-08 |                      |            |
|                 | 7.33173750356385e-08 | -0.129898349123998   | 2.4331693694678e-09  |                      |            |
|                 | 9.32964450084638e-09 | -0.101809245199307   | 2.14718530305318e-06 |                      |            |
|                 | 2.2771272863353e-05  | -0.0826323050881177  | 0.000118698140669678 |                      |            |
|                 | 0.00134487151526758  | -0.0736088264590027  | 0.000626242897725043 |                      |            |
|                 | 0.00321140161410745  | -0.143787380315199   | 4.30453926693533e-11 |                      |            |
|                 | 5.42560010029009e-10 |                      |                      |                      |            |
| ENSG00000204262 | 2                    | 189031896            | 189179879            | protein_coding       | COL5A2     |
|                 | 147983               | -0.668853075406735   | 8.78836581826013e-32 |                      |            |
|                 | 3.53782819335076e-30 | -0.645158437608504   | 4.66654764741326e-30 |                      |            |
|                 | 1.00692722713367e-28 | -0.340558940887231   | 1.21671214539633e-10 |                      |            |
|                 | 3.41534387623952e-09 | -0.264670469360656   | 4.75445815508861e-07 |                      |            |
|                 | 1.49275673339413e-05 | -0.315441729939494   | 2.99271570431986e-09 |                      |            |
|                 | 7.00052822186173e-08 | -0.179696791039794   | 0.000526770357336835 |                      |            |
|                 | 0.00187578409073156  |                      |                      |                      |            |
| ENSG00000205517 | 19                   | 11384341             | 11419342             | protein_coding       | RGL3       |
|                 | 35001                | -0.264674827590946   | 3.00417389515409e-19 |                      |            |
|                 | 3.31224523089919e-18 | -0.338171831377739   | 1.01578930635727e-28 |                      |            |
|                 | 1.97073245376588e-27 | -0.123633108435858   | 1.09470867463758e-05 |                      |            |
|                 | 9.45893868118632e-05 | -0.0893844457754547  | 0.0014453060567557   |                      |            |
|                 | 0.00955705562741811  | -0.176786216990537   | 6.8461150327601e-10  |                      |            |
|                 | 2.10772117270312e-08 | -0.305591465478999   | 1.72575705893489e-24 |                      |            |
|                 | 1.03518557982195e-22 |                      |                      |                      |            |
| ENSG00000205542 | X                    | 12975108             | 12977227             | protein_coding       | TMSB4X     |
|                 | 2119                 | -0.387557902180334   | 1.93447548925926e-17 |                      |            |
|                 | 1.75114431418768e-16 | -0.725827745409534   | 3.98633383007199e-47 |                      |            |
|                 | 3.23453618430685e-45 | -0.390690038082128   | 8.1685112233497e-18  |                      |            |
|                 | 7.95357727178531e-16 | -0.140075988524589   | 0.001336207738609    |                      |            |
|                 | 0.00903862736323864  | -0.165941069642146   | 0.000161763029713852 |                      |            |
|                 | 0.00101046761824864  | -0.173107958329005   | 7.29033046982342e-05 |                      |            |
|                 | 0.000318318549297587 |                      |                      |                      |            |
| ENSG00000213722 | 6                    | 31727038             | 31730617             | protein_coding       | DDAH2 3579 |
|                 | -0.471176844531105   | 3.66028053467524e-29 | 1.16137495824247e-27 |                      |            |
|                 | -0.489507007016847   | 4.73677087113634e-31 | 1.10470289523103e-29 |                      |            |
|                 | -0.125063874311884   | 0.00115304349105036  | 0.00519620033181185  |                      |            |
|                 | -0.143178049060833   | 0.0002195460335824   | 0.00217438503317241  |                      |            |
|                 | -0.272571082044109   | 7.88836803619584e-12 | 3.33948058793193e-10 |                      |            |
|                 | -0.271835181507515   | 6.24341096309092e-12 | 8.818322701178e-11   |                      |            |
| ENSG00000221978 | 1                    | 1385711              | 1399328              | protein_coding       | CCNL2      |
|                 | 13617                | -0.274021446122767   | 1.50167211793498e-56 |                      |            |
|                 | 1.11402618691948e-53 | -0.176704841603298   | 3.53949228475053e-29 |                      |            |
|                 | 7.09675036089171e-28 | -0.0761089998029707  | 1.96481410536192e-07 |                      |            |
|                 | 2.68037118629013e-06 | -0.0710881929833729  | 1.24406550975361e-06 |                      |            |
|                 | 3.21948448113813e-05 | -0.158812319935259   | 2.24592324818033e-24 |                      |            |

|                 |                      |                      |                      |                      |           |
|-----------------|----------------------|----------------------|----------------------|----------------------|-----------|
|                 | 7.60635614856551e-22 | -0.129046515389065   | 1.29491566005567e-17 |                      |           |
|                 | 3.57686011844102e-16 |                      |                      |                      |           |
| ENSG00000228486 | 2                    | 97664217             | 97703064             | protein_coding       | C2orf92   |
|                 | 38847                | -0.385179703845899   | 2.60802155805337e-18 |                      |           |
|                 | 2.58298587748973e-17 | -0.255972507944975   | 2.12597709576692e-09 |                      |           |
|                 | 8.20222812653613e-09 | -0.136965267440589   | 0.00105838968502957  |                      |           |
|                 | 0.0048364972903012   | -0.142955722934182   | 0.000676222301714475 |                      |           |
|                 | 0.00530991292258559  | -0.259551163398386   | 1.60673653226843e-09 |                      |           |
|                 | 4.05010224716164e-08 | -0.191616170101795   | .63601091472438e-06  |                      |           |
|                 | 3.10698563483691e-05 |                      |                      |                      |           |
| ENSG00000237172 | 16                   | 67148105             | 67151214             | protein_coding       | B3GNT9    |
|                 | 3109                 | -0.268783190980106   | 1.02424965900504e-08 |                      |           |
|                 | 3.89379830103453e-08 | -0.474766540477253   | 3.82701822868646e-22 |                      |           |
|                 | 4.47605983368667e-21 | -0.246642523903458   | 1.17979244909203e-07 |                      |           |
|                 | 1.70342785582991e-06 | -0.263228933874499   | 2.02618006439438e-08 |                      |           |
|                 | 1.12735211511429e-06 | -0.299802827124953   | 2.53955085766866e-10 |                      |           |
|                 | 7.6230564184239e-09  | -0.265806179451038   | 1.32244986497394e-08 |                      |           |
|                 | 1.17593872411124e-07 |                      |                      |                      |           |
| ENSG00000242265 | 7                    | 94656325             | 94669695             | protein_coding       | PEG10     |
|                 | 13370                | -1.765323393901563   | .40771378836601e-50  | 1.26401840735605e-47 |           |
|                 | -1.740067848734234   | .11933883342925e-49  | 3.86597467987917e-47 | -                    |           |
|                 | 0.7415265247765129   | .78068452960651e-13  | 4.12935729774363e-11 | -                    |           |
|                 | 0.6130303512377082   | .99675811471833e-09  | 2.26633469267946e-07 | -                    |           |
|                 | 0.7797577599888331   | .31152721282588e-13  | 8.84514391714907e-12 | -                    |           |
|                 | 0.8789542574946397   | .01529092496328e-17  | 1.77709296455289e-15 |                      |           |
| ENSG00000248592 | 3                    | 52833121             | 52897562             | protein_coding       | TMEM110-  |
| MUSTN1          | 64441                | -0.863889196953441   | 4.77576147130417e-18 |                      |           |
|                 | 4.58057696677705e-17 | -0.435127320962671   | 5.11666543823668e-06 |                      |           |
|                 | 1.39920187576425e-05 | -0.309040111039186   | 0.00105553391419088  |                      |           |
|                 | 0.00482799848772157  | -0.424915177645439   | 8.58812333206855e-06 |                      |           |
|                 | 0.000160617495066382 | -0.405382145683723   | 2.28398280697281e-05 |                      |           |
|                 | 0.000184938503897242 | -0.316894742822444   | 0.000797221047748731 |                      |           |
|                 | 0.00271236224129231  |                      |                      |                      |           |
| ENSG00000250436 | 4                    | 73508803             | 73534128             | lincRNA              | LINC02499 |
|                 | 25325                | -0.787660109067909   | 9.48478783140682e-21 |                      |           |
|                 | 1.21018435401709e-19 | -0.934517439400448   | 1.98846169258722e-27 |                      |           |
|                 | 3.51227264272293e-26 | -0.421066677375895   | 1.40810027600576e-07 |                      |           |
|                 | 1.97628776575619e-06 | -0.467274461068549   | 7.02673757440255e-09 |                      |           |
|                 | 4.82244690183336e-07 | -0.452571747162946   | 2.23931581716953e-08 |                      |           |
|                 | 4.16304309256373e-07 | -0.589168139192227   | 5.5097365766834e-13  |                      |           |
|                 | 9.04490897030039e-12 |                      |                      |                      |           |
| ENSG00000251562 | 11                   | 65497762             | 65506516             | lincRNA              | MALAT1    |
|                 | 8754                 | -0.351476460585181   | 3.79618251406877e-25 | 7.71065546110527e-24 |           |
|                 | -0.459322443292686   | 2.19806201448153e-38 | 9.20527100096984e-37 |                      |           |
|                 | -0.377461721974283   | 1.97335850481214e-28 | 6.83176714365963e-26 |                      |           |
|                 | -0.294582444074772   | 7.8858143590123e-19  | 3.96300328706621e-16 |                      |           |
|                 | -0.302082273824711   | 1.83844472337146e-19 | 3.30182298365282e-17 |                      |           |
|                 | -0.318289640812198   | 1.44145483756381e-21 | 6.15244518202918e-20 |                      |           |

| eQTL                                        | qvalue      | Omeprazole   | qvalue          | Phenobarbital   | qvalue      | Dexamethasone | gene            |
|---------------------------------------------|-------------|--------------|-----------------|-----------------|-------------|---------------|-----------------|
|                                             | qvalue      | Carbamazepin | qvalue          | Phenytoin       | qvalue      | Rifampicin    | snpsnp          |
| rs72882321:172298662:C:T:ENSG00000071967    | 0.548514013 | 0.755899513  | 0.710284102     | 0.813853703     | 0.607460586 | 0.039514306   |                 |
| rs72882321:172298662:C:T                    |             |              | ENSG00000071967 |                 |             |               |                 |
| rs12052918:172368896:T:C:ENSG00000071967    | 0.238368074 | 0.717626797  | 0.532319281     | 0.659336192     | 0.363374684 | 0.039514306   |                 |
| rs12052918:172368896:T:C                    |             |              | ENSG00000071967 |                 |             |               |                 |
| rs12052537:172369108:C:A:ENSG00000071967    | 0.20393713  | 0.687899847  | 0.480692872     | 0.60918994      | 0.359567157 | 0.039514306   |                 |
| rs12052537:172369108:C:A                    |             |              | ENSG00000071967 |                 |             |               |                 |
| rs17221848:ENSG00000071967                  | 0.630446445 | 0.63278855   | 0.736913564     | rs17221848      | 0.039514306 | 0.184980376   | ENSG00000071967 |
| rs374693482:172372701:TCA:T:ENSG00000071967 | 0.20393713  | 0.627744359  | 0.655885306     | 0.737268887     | 0.363374684 | 0.039514306   |                 |
| rs374693482:172372701:TCA:T                 |             |              | ENSG00000071967 |                 |             |               |                 |
| rs72884306:172375786:C:T:ENSG00000071967    | 0.121437838 | 0.558498626  | 0.54593522      | 0.692744521     | 0.297292124 | 0.039514306   |                 |
| rs72884306:172375786:C:T                    |             |              | ENSG00000071967 |                 |             |               |                 |
| rs7585974:172377212:C:G:ENSG00000071967     | 0.477036266 | 0.712954796  | 0.66458282      | 0.796725806     | 0.400417037 | 0.039514306   |                 |
| rs7585974:172377212:C:G                     |             |              | ENSG00000071967 |                 |             |               |                 |
| rs115283512:172379649:C:T:ENSG00000071967   | 0.054815691 | 0.484670506  | 0.519536868     | 0.692744521     | 0.260395929 | 0.039514306   |                 |
| rs115283512:172379649:C:T                   |             |              | ENSG00000071967 |                 |             |               |                 |
| rs72884332:172380348:T:G:ENSG00000071967    | 0.054815691 | 0.476011459  | 0.519536868     | 0.689693952     | 0.248591073 | 0.039514306   |                 |
| rs72884332:172380348:T:G                    |             |              | ENSG00000071967 |                 |             |               |                 |
| rs151054210:172381487:G:A:ENSG00000071967   | 0.054815691 | 0.424824518  | 0.371793022     | 0.532059322     | 0.271758927 | 0.039514306   |                 |
| rs151054210:172381487:G:A                   |             |              | ENSG00000071967 |                 |             |               |                 |
| rs55862034:172382840:C:G:ENSG00000071967    | 0.054815691 | 0.455203609  | 0.477032507     | 0.661034047     | 0.23524183  | 0.039514306   |                 |
| rs55862034:172382840:C:G                    |             |              | ENSG00000071967 |                 |             |               |                 |
| 2:201748874:G:C:ENSG00000240344             | 0.072575018 | 0.069942274  | 0.063994875     | 2:201748874:G:C | 0.035322296 | 0.110495165   | 0.054815691     |
| rs10172647:201778950:A:G:ENSG00000240344    | 0.090437058 | 0.123210094  | 0.069942274     | 0.140342165     | 0.035322296 | 0.12731097    |                 |
| rs10172647:201778950:A:G                    |             |              | ENSG00000240344 |                 |             |               |                 |
| rs10207973:201806597:T:C:ENSG00000240344    | 0.255451763 | 0.197042097  | 0.069942274     | 0.225997306     | 0.035322296 | 0.38687185    |                 |
| rs10207973:201806597:T:C                    |             |              | ENSG00000240344 |                 |             |               |                 |
| rs68133847:201812251:G:A:ENSG00000240344    | 0.090437058 | 0.165229468  | 0.069942274     | 0.174366738     | 0.035322296 | 0.145249232   |                 |
| rs68133847:201812251:G:A                    |             |              | ENSG00000240344 |                 |             |               |                 |
| rs6723527:201855554:G:A:ENSG00000240344     | 0.090437058 | 0.165229468  | 0.069942274     | 0.174366738     | 0.035322296 | 0.145249232   |                 |
| rs6723527:201855554:G:A                     |             |              | ENSG00000240344 |                 |             |               |                 |
| rs7597409:201893188:T:C:ENSG00000240344     | 0.054815691 | 0.072575018  | 0.069942274     | 0.225997306     | 0.035322296 | 0.145249232   |                 |
| rs7597409:201893188:T:C                     |             |              | ENSG00000240344 |                 |             |               |                 |
| rs114938073:201894019:A:G:ENSG00000240344   | 0.054815691 | 0.072575018  | 0.069942274     | 0.225997306     | 0.035322296 | 0.145249232   |                 |
| rs114938073:201894019:A:G                   |             |              | ENSG00000240344 |                 |             |               |                 |

rs13408186:201896367:T:C:ENSG00000240344 0.035322296 0.145249232  
0.054815691 0.072575018 0.069942274 0.225997306  
rs13408186:201896367:T:C ENSG00000240344  
rs10185136:201904301:C:T:ENSG00000240344 0.035322296 0.209793344  
0.090437058 0.123210094 0.069942274 0.308405655  
rs10185136:201904301:C:T ENSG00000240344  
rs28405687:201906661:T:C:ENSG00000240344 0.035322296 0.316996396  
0.20393713 0.123210094 0.069942274 0.369977602  
rs28405687:201906661:T:C ENSG00000240344  
rs16842071:201931730:T:C:ENSG00000240344 0.035322296 0.311964405  
0.184980376 0.123210094 0.069942274 0.369977602  
rs16842071:201931730:T:C ENSG00000240344  
rs57631609:201963772:T:C:ENSG00000240344 0.035322296 0.265249339  
0.283332252 0.197042097 0.069942274 0.447199093  
rs57631609:201963772:T:C ENSG00000240344  
rs142396015:201972973:T:TATC:ENSG00000240344 0.035322296 0.3227674  
0.390230616 0.123210094 0.112902598 0.423659401  
rs142396015:201972973:T:TATC ENSG00000240344  
rs2881928:201982544:T:C:ENSG00000240344 0.035322296 0.33968813  
0.360243455 0.197042097 0.069942274 0.497503372  
rs2881928:201982544:T:C ENSG00000240344  
rs7583529:201988238:G:A:ENSG00000240344 0.035322296 0.248891879 0.5196698  
0.558498626 0.173591669 0.813853703 rs7583529:201988238:G:A  
ENSG00000240344  
rs4663326:234616571:A:G:ENSG00000240224 0.035322296 0.039514306  
0.054815691 0.399004389 0.069942274 0.063994875  
rs4663326:234616571:A:G ENSG00000240224  
rs2885295:234619866:T:A:ENSG00000240224 0.404030971 0.039514306  
0.054815691 0.314254491 0.069942274 0.75395128  
rs2885295:234619866:T:A ENSG00000240224  
rs2885295:234619866:T:A:ENSG00000244474 0.146968287 0.039514306  
0.054815691 0.072575018 0.069942274 0.063994875  
rs2885295:234619866:T:A ENSG00000244474  
rs28898595:234620533:T:C:ENSG00000240224 0.404030971 0.039514306  
0.054815691 0.314254491 0.069942274 0.75395128  
rs28898595:234620533:T:C ENSG00000240224  
rs28898596:234620640:G:A:ENSG00000240224 0.38908834 0.039514306  
0.054815691 0.301206855 0.069942274 0.737268887  
rs28898596:234620640:G:A ENSG00000240224  
rs28898596:234620640:G:A:ENSG00000244474 0.155490932 0.039514306  
0.054815691 0.072575018 0.069942274 0.063994875  
rs28898596:234620640:G:A ENSG00000244474  
rs3893334:234620917:C:T:ENSG00000240224 0.390769583 0.039514306  
0.054815691 0.301206855 0.069942274 0.737268887  
rs3893334:234620917:C:T ENSG00000240224  
rs3893334:234620917:C:T:ENSG00000244474 0.155490932 0.039514306  
0.054815691 0.072575018 0.069942274 0.063994875  
rs3893334:234620917:C:T ENSG00000244474  
rs2013030:234621040:A:G:ENSG00000240224 0.035322296 0.039514306  
0.054815691 0.399004389 0.069942274 0.063994875  
rs2013030:234621040:A:G ENSG00000240224  
rs2013018:234621157:T:C:ENSG00000240224 0.386834658 0.039514306  
0.054815691 0.326422852 0.069942274 0.748055982  
rs2013018:234621157:T:C ENSG00000240224

rs2013018:234621157:T:C:ENSG00000244474 0.146968287 0.039514306  
0.054815691 0.072575018 0.069942274 0.063994875  
rs2013018:234621157:T:C ENSG00000244474  
rs5020121:234621269:C:T:ENSG00000240224 0.386834658 0.039514306  
0.054815691 0.314254491 0.069942274 0.748055982  
rs5020121:234621269:C:T ENSG00000240224  
rs5020121:234621269:C:T:ENSG00000244474 0.146968287 0.039514306  
0.054815691 0.072575018 0.069942274 0.063994875  
rs5020121:234621269:C:T ENSG00000244474  
rs5839490:234621391:T:TC:ENSG00000240224 0.36952798 0.039514306  
0.054815691 0.314254491 0.112902598 0.72816107  
rs5839490:234621391:T:TC ENSG00000240224  
rs5839490:234621391:T:TC:ENSG00000244474 0.146968287 0.039514306  
0.054815691 0.072575018 0.069942274 0.063994875  
rs5839490:234621391:T:TC ENSG00000244474  
rs4556969:234621404:C:T:ENSG00000240224 0.38908834 0.039514306  
0.054815691 0.314254491 0.069942274 0.748055982  
rs4556969:234621404:C:T ENSG00000240224  
rs4556969:234621404:C:T:ENSG00000244474 0.146968287 0.039514306  
0.054815691 0.072575018 0.069942274 0.063994875  
rs4556969:234621404:C:T ENSG00000244474  
rs3755323:234621780:T:C:ENSG00000240224 0.38908834 0.039514306  
0.054815691 0.314254491 0.069942274 0.748055982  
rs3755323:234621780:T:C ENSG00000240224  
rs3755323:234621780:T:C:ENSG00000244474 0.146968287 0.039514306  
0.054815691 0.072575018 0.069942274 0.063994875  
rs3755323:234621780:T:C ENSG00000244474  
rs3755322:234621787:C:G:ENSG00000240224 0.390769583 0.039514306  
0.054815691 0.314254491 0.069942274 0.748055982  
rs3755322:234621787:C:G ENSG00000240224  
rs3755322:234621787:C:G:ENSG00000244474 0.146968287 0.039514306  
0.054815691 0.072575018 0.069942274 0.063994875  
rs3755322:234621787:C:G ENSG00000244474  
exm277212:ENSG00000240224 0.415662768 0.039514306 0.054815691  
0.399004389 0.173591669 0.765700979 exm277212 ENSG00000240224  
rs3755320:234622061:C:A:ENSG00000240224 0.390769583 0.039514306  
0.054815691 0.226823504 0.069942274 0.748055982  
rs3755320:234622061:C:A ENSG00000240224  
rs3755320:234622061:C:A:ENSG00000244474 0.100009087 0.039514306  
0.054815691 0.072575018 0.069942274 0.063994875  
rs3755320:234622061:C:A ENSG00000244474  
rs12475068:234622110:C:G:ENSG00000240224 0.396535557 0.039514306  
0.054815691 0.244282474 0.069942274 0.753387287  
rs12475068:234622110:C:G ENSG00000240224  
rs17868333:234622282:C:T:ENSG00000240224 0.396535557 0.039514306  
0.054815691 0.244282474 0.069942274 0.75395128  
rs17868333:234622282:C:T ENSG00000240224  
rs17868333:234622282:C:T:ENSG00000244474 0.117465891 0.039514306  
0.054815691 0.072575018 0.069942274 0.063994875  
rs17868333:234622282:C:T ENSG00000244474  
rs2012736:234622379:C:A:ENSG00000240224 0.386834658 0.039514306  
0.054815691 0.301206855 0.069942274 0.735371396  
rs2012736:234622379:C:A ENSG00000240224



rs2012736:234622379:C:A:ENSG00000244474 0.117465891 0.039514306  
0.054815691 0.072575018 0.069942274 0.063994875  
rs2012736:234622379:C:A ENSG00000244474  
rs17862868:234622382:G:C:ENSG00000240224 0.365060315 0.039514306  
0.054815691 0.276782326 0.069942274 0.710464737  
rs17862868:234622382:G:C ENSG00000240224  
rs17862868:234622382:G:C:ENSG00000244474 0.117465891 0.039514306  
0.054815691 0.072575018 0.069942274 0.063994875  
rs17862868:234622382:G:C ENSG00000244474  
rs3892170:234622412:G:C:ENSG00000240224 0.357981916 0.039514306  
0.054815691 0.263905944 0.069942274 0.699560088  
rs3892170:234622412:G:C ENSG00000240224  
rs3892170:234622412:G:C:ENSG00000244474 0.132837758 0.039514306  
0.054815691 0.072575018 0.069942274 0.063994875  
rs3892170:234622412:G:C ENSG00000244474  
rs17862870:234622742:G:A:ENSG00000240224 0.382322444 0.039514306  
0.054815691 0.333474506 0.069942274 0.728499331  
rs17862870:234622742:G:A ENSG00000240224  
rs17862870:234622742:G:A:ENSG00000244474 0.100009087 0.039514306  
0.054815691 0.072575018 0.069942274 0.063994875  
rs17862870:234622742:G:A ENSG00000244474  
rs4663945:234623117:G:A:ENSG00000240224 0.035322296 0.039514306  
0.054815691 0.432896498 0.069942274 0.063994875  
rs4663945:234623117:G:A ENSG00000240224  
rs148944858:234623534:A:ATCTTTTTTTTTT:ENSG00000244474 0.117465891  
0.039514306 0.054815691 0.072575018 0.069942274 0.063994875  
rs148944858:234623534:A:ATCTTTTTTTTTT ENSG00000244474  
rs12477216:234623667:C:T:ENSG00000240224 0.342246666 0.039514306  
0.054815691 0.244282474 0.069942274 0.687592023  
rs12477216:234623667:C:T ENSG00000240224  
rs12477216:234623667:C:T:ENSG00000244474 0.081933656 0.039514306  
0.054815691 0.072575018 0.069942274 0.063994875  
rs12477216:234623667:C:T ENSG00000244474  
rs35623965:234624020:C:CAT:ENSG00000240224 0.343365679 0.039514306  
0.054815691 0.244282474 0.069942274 0.682445152  
rs35623965:234624020:C:CAT ENSG00000240224  
rs17862871:234624374:C:T:ENSG00000240224 0.343365679 0.039514306  
0.054815691 0.244282474 0.069942274 0.682445152  
rs17862871:234624374:C:T ENSG00000240224  
rs17868334:234624817:A:G:ENSG00000240224 0.405404276 0.039514306  
0.054815691 0.326422852 0.069942274 0.75395128  
rs17868334:234624817:A:G ENSG00000240224  
rs17863791:234624884:T:C:ENSG00000240224 0.404030971 0.039514306  
0.054815691 0.326422852 0.069942274 0.75395128  
rs17863791:234624884:T:C ENSG00000240224  
rs17863791:234624884:T:C:ENSG00000244474 0.081933656 0.039514306  
0.054815691 0.072575018 0.069942274 0.063994875  
rs17863791:234624884:T:C ENSG00000244474  
rs17868335:234624983:C:A:ENSG00000240224 0.444708302 0.039514306  
0.054815691 0.445043357 0.251839208 0.782163764  
rs17868335:234624983:C:A ENSG00000240224  
rs17863792:234625126:G:A:ENSG00000240224 0.429516025 0.039514306  
0.054815691 0.469436994 0.279727316 0.813853703  
rs17863792:234625126:G:A ENSG00000240224



rs17864696:234625194:A:C:ENSG00000240224 0.353415248 0.039514306  
0.054815691 0.244282474 0.069942274 0.701491834  
rs17864696:234625194:A:C ENSG00000240224  
rs17874943:234625239:A:G:ENSG00000240224 0.353415248 0.039514306  
0.054815691 0.244282474 0.069942274 0.701491834  
rs17874943:234625239:A:G ENSG00000240224  
rs28898605:234625494:A:G:ENSG00000240224 0.39423759 0.039514306  
0.054815691 0.326422852 0.069942274 0.753627885  
rs28898605:234625494:A:G ENSG00000240224  
rs3806595:234625718:T:A:ENSG00000240224 0.404030971 0.039514306  
0.054815691 0.358702521 0.198669295 0.749911035  
rs3806595:234625718:T:A ENSG00000240224  
rs3806594:234625890:T:C:ENSG00000240224 0.393141652 0.039514306  
0.054815691 0.37163762 0.112902598 0.755308559  
rs3806594:234625890:T:C ENSG00000240224  
rs3806593:234625919:A:G:ENSG00000240224 0.395046141 0.039514306  
0.054815691 0.333474506 0.112902598 0.759430312  
rs3806593:234625919:A:G ENSG00000240224  
rs3806591:234626199:T:C:ENSG00000240224 0.410204038 0.039514306  
0.054815691 0.399004389 0.069942274 0.768929031  
rs3806591:234626199:T:C ENSG00000240224  
rs3732221:234627010:C:T:ENSG00000240224 0.357981916 0.039514306  
0.054815691 0.244282474 0.069942274 0.723412688  
rs3732221:234627010:C:T ENSG00000240224  
rs3732221:234627010:C:T:ENSG00000244474 0.081933656 0.039514306  
0.054815691 0.072575018 0.069942274 0.063994875  
rs3732221:234627010:C:T ENSG00000244474  
rs3732220:234627048:G:A:ENSG00000240224 0.356504719 0.039514306  
0.054815691 0.244282474 0.069942274 0.723412688  
rs3732220:234627048:G:A ENSG00000240224  
rs3732220:234627048:G:A:ENSG00000244474 0.060909118 0.039514306  
0.054815691 0.072575018 0.069942274 0.063994875  
rs3732220:234627048:G:A ENSG00000244474  
2:234627248-C-T:ENSG00000240224 0.397619131 0.039514306 0.054815691  
0.350892299 0.069942274 0.758762279 2:234627248-C-T ENSG00000240224  
2:234627248-C-T:ENSG00000244474 0.200359533 0.039514306 0.054815691  
0.072575018 0.069942274 0.063994875 2:234627248-C-T ENSG00000244474  
rs3732218:234627304:G:A:ENSG00000240224 0.382322444 0.039514306  
0.054815691 0.333474506 0.069942274 0.736913564  
rs3732218:234627304:G:A ENSG00000240224  
rs3732218:234627304:G:A:ENSG00000244474 0.200359533 0.039514306  
0.054815691 0.072575018 0.069942274 0.063994875  
rs3732218:234627304:G:A ENSG00000244474  
2:234627608-T-G:ENSG00000244474 0.035322296 0.039514306 0.054815691  
0.072575018 0.069942274 0.063994875 2:234627608-T-G ENSG00000244474  
rs115035044:238377030:T:A:ENSG00000115648 0.393141652 0.039514306  
0.828327833 0.558498626 0.731325674 0.476127813  
rs115035044:238377030:T:A ENSG00000115648  
rs11680800:241793977:A:G:ENSG00000172478 0.190392053 0.039514306  
0.390230616 0.326422852 0.069942274 0.063994875  
rs11680800:241793977:A:G ENSG00000172478  
rs10933638:ENSG00000172478 0.290380371 0.039514306 0.5196698  
0.326422852 0.069942274 0.063994875 rs10933638 ENSG00000172478

rs4401206:241796905:A:G:ENSG00000172478 0.357981916 0.039514306  
0.593231314 0.432896498 0.069942274 0.063994875  
rs4401206:241796905:A:G ENSG00000172478  
rs6437371:241797424:G:C:ENSG00000172478 0.320653282 0.039514306  
0.568513848 0.390584104 0.112902598 0.063994875  
rs6437371:241797424:G:C ENSG00000172478  
rs4465762:241798862:G:A:ENSG00000172478 0.359567157 0.039514306  
0.587216849 0.429269101 0.148497947 0.063994875  
rs4465762:241798862:G:A ENSG00000172478  
rs10182575:241806690:C:T:ENSG00000172478 0.376064036 0.039514306  
0.604215794 0.435112224 0.112902598 0.063994875  
rs10182575:241806690:C:T ENSG00000172478  
rs4283416:241820207:G:C:ENSG00000172478 0.600934349 0.039514306  
0.708429962 0.435112224 0.237095457 0.140342165  
rs4283416:241820207:G:C ENSG00000172478  
rs11898716:241828311:A:G:ENSG00000172478 0.601362592 0.039514306  
0.686442642 0.385352708 0.112902598 0.108665807  
rs11898716:241828311:A:G ENSG00000172478  
rs6720357:241830296:A:C:ENSG00000172478 0.600934349 0.039514306  
0.708429962 0.435112224 0.237095457 0.140342165  
rs6720357:241830296:A:C ENSG00000172478  
rs6749674:241834501:G:C:ENSG00000172478 0.601362592 0.039514306  
0.716164833 0.419678998 0.237095457 0.140342165  
rs6749674:241834501:G:C ENSG00000172478  
rs3936203:241834654:A:G:ENSG00000172478 0.605787723 0.039514306  
0.730770151 0.476011459 0.300892226 0.108665807  
rs3936203:241834654:A:G ENSG00000172478  
rs6748734:241837452:A:G:ENSG00000172478 0.556419241 0.039514306  
0.793209929 0.486971863 0.347424829 0.308405655  
rs6748734:241837452:A:G ENSG00000172478  
rs4675860:241840417:A:G:ENSG00000172478 0.554566691 0.039514306  
0.777393854 0.447551187 0.311775972 0.24867752  
rs4675860:241840417:A:G ENSG00000172478  
rs2871579:242054129:G:A:ENSG00000122085 0.289740841 0.039514306  
0.828327833 0.558498626 0.920590777 0.419171564  
rs2871579:242054129:G:A ENSG00000122085  
rs2041083:242056214:T:C:ENSG00000122085 0.386834658 0.039514306  
0.828327833 0.571216401 0.924570959 0.438723573  
rs2041083:242056214:T:C ENSG00000122085  
rs2255558:9416832:C:T:ENSG00000206573 0.190392053 0.039514306  
0.390230616 0.072575018 0.831120493 0.634143776 rs2255558:9416832:C:T  
ENSG00000206573  
rs2648561:9418083:G:A:ENSG00000206573 0.23524183 0.039514306  
0.450702715 0.072575018 0.85654698 0.66967784 rs2648561:9418083:G:A  
ENSG00000206573  
rs2596912:9438746:C:T:ENSG00000206573 0.264115932 0.039514306  
0.592067279 0.358702521 0.879548973 0.782163764 rs2596912:9438746:C:T  
ENSG00000206573  
rs2251166:9441737:G:A:ENSG00000206573 0.146129194 0.039514306  
0.557353332 0.072575018 0.839071584 0.66629958 rs2251166:9441737:G:A  
ENSG00000206573  
rs7650141:9449410:T:C:ENSG00000206573 0.146968287 0.039514306  
0.568513848 0.072575018 0.850760242 0.681432383 rs7650141:9449410:T:C  
ENSG00000206573

rs4328788:9457261:A:T:ENSG00000206573 0.196140407 0.039514306  
0.568513848 0.358702521 0.9305498 0.758857069 rs4328788:9457261:A:T  
ENSG00000206573

rs4308263:9457358:A:G:ENSG00000206573 0.228236375 0.039514306  
0.589831546 0.399004389 0.9305498 0.775020218 rs4308263:9457358:A:G  
ENSG00000206573

rs34073644:9457867:GTCT:G:ENSG00000206573 0.132837758 0.039514306  
0.539346559 0.072575018 0.817417629 0.636576046  
rs34073644:9457867:GTCT:G ENSG00000206573

rs7615424:9458710:A:T:ENSG00000206573 0.035322296 0.039514306  
0.370396184 0.263905944 0.879548973 0.614118716 rs7615424:9458710:A:T  
ENSG00000206573

rs3885755:9459206:A:G:ENSG00000206573 0.132837758 0.039514306  
0.581240934 0.123210094 0.864454465 0.699560088 rs3885755:9459206:A:G  
ENSG00000206573

rs3885754:9459295:A:G:ENSG00000206573 0.190392053 0.039514306  
0.568513848 0.358702521 0.9305498 0.75609486 rs3885754:9459295:A:G  
ENSG00000206573

rs34665459:9464725:T:C:ENSG00000206573 0.219347314 0.039514306  
0.580001614 0.390584104 0.9305498 0.762727032  
rs34665459:9464725:T:C ENSG00000206573

rs2596937:ENSG00000206573 0.169284753 0.039514306 0.557353332  
0.385352708 0.897716677 0.760182201 rs2596937 ENSG00000206573

rs111848682:9494274:TGTTTACAG:T:ENSG00000206573 0.271758927  
0.039514306 0.539346559 0.390584104 0.935509834 0.782163764  
rs111848682:9494274:TGTTTACAG:T ENSG00000206573

rs3898760:9495119:C:A:ENSG00000206573 0.28152348 0.039514306  
0.568513848 0.401539023 0.942757737 0.797872501 rs3898760:9495119:C:A  
ENSG00000206573

rs2648580:ENSG00000206573 0.23344096 0.039514306 0.528262409  
0.072575018 0.790805577 0.740998143 rs2648580 ENSG00000206573

rs35667509:9497885:GT:G:ENSG00000206573 0.25732594 0.039514306 0.48190184  
0.419678998 0.897716677 0.631825967 rs35667509:9497885:GT:G  
ENSG00000206573

rs3872707:9514016:G:A:ENSG00000206573 0.289740841 0.039514306  
0.324917292 0.350892299 0.848727643 0.813853703 rs3872707:9514016:G:A  
ENSG00000206573

rs17050383:9514580:G:A:ENSG00000206573 0.271758927 0.039514306  
0.495886418 0.458827356 0.920076405 0.704314191  
rs17050383:9514580:G:A ENSG00000206573

rs7619363:14681274:T:C:ENSG00000154781 0.035322296 0.039514306  
0.054815691 0.072575018 0.112902598 0.453831125  
rs7619363:14681274:T:C ENSG00000154781

rs9310457:ENSG00000154781 0.035322296 0.145249232 0.054815691  
0.072575018 0.173591669 0.414364157 rs9310457 ENSG00000154781

rs60053343:14689720:T:TTTA:ENSG00000154781 0.060909118 0.039514306  
0.054815691 0.072575018 0.148497947 0.457928806  
rs60053343:14689720:T:TTTA ENSG00000154781

rs7637233:14692314:T:G:ENSG00000154781 0.31683404 0.039514306  
0.568513848 0.072575018 0.493250562 0.517746279  
rs7637233:14692314:T:G ENSG00000154781

rs11349697:48838111:CT:C:ENSG00000178252 0.331782397 0.039514306  
0.687554362 0.290136921 0.690981753 0.831753861  
rs11349697:48838111:CT:C ENSG00000178252

rs11326627:48860215:TG:T:ENSG00000178252 0.271758927 0.039514306  
0.744376278 0.276782326 0.54593522 0.813853703  
rs11326627:48860215:TG:T ENSG00000178252  
rs9311434:48884147:T:C:ENSG00000178252 0.271758927 0.039514306  
0.747767793 0.276782326 0.580298595 0.813853703  
rs9311434:48884147:T:C ENSG00000178252  
rs7623023:48914238:G:A:ENSG00000178252 0.293391132 0.039514306  
0.774174244 0.340834261 0.608245709 0.813853703  
rs7623023:48914238:G:A ENSG00000178252  
rs7431710:48935583:G:A:ENSG00000178252 0.291376195 0.039514306  
0.760415187 0.36680942 0.629639249 0.813853703  
rs7431710:48935583:G:A ENSG00000178252  
rs11920534:48937761:G:T:ENSG00000178252 0.27577637 0.039514306  
0.730770151 0.358702521 0.526407644 0.813853703  
rs11920534:48937761:G:T ENSG00000178252  
rs11705737:48951259:C:T:ENSG00000178252 0.271758927 0.039514306  
0.746997764 0.301206855 0.54593522 0.813853703  
rs11705737:48951259:C:T ENSG00000178252  
rs7628719:48995487:C:T:ENSG00000178252 0.27577637 0.039514306  
0.774918193 0.290136921 0.603710229 0.813853703  
rs7628719:48995487:C:T ENSG00000178252  
rs4974082:48999323:G:A:ENSG00000178252 0.322853095 0.039514306 0.69711943  
0.379688866 0.74808171 0.813853703 rs4974082:48999323:G:A  
ENSG00000178252  
rs4513485:49139966:G:A:ENSG00000178252 0.271758927 0.039514306  
0.739251903 0.326422852 0.54593522 0.813853703  
rs4513485:49139966:G:A ENSG00000178252  
rs6770112:49174006:G:C:ENSG00000178252 0.328661655 0.039514306  
0.686442642 0.445043357 0.667917828 0.813853703  
rs6770112:49174006:G:C ENSG00000178252  
rs4955410:49181218:A:G:ENSG00000178252 0.304041304 0.039514306  
0.781136655 0.36680942 0.650850274 0.813853703  
rs4955410:49181218:A:G ENSG00000178252  
rs12487580:49182932:G:A:ENSG00000178252 0.328661655 0.039514306  
0.686442642 0.445043357 0.667917828 0.813853703  
rs12487580:49182932:G:A ENSG00000178252  
rs36133651:49183955:C:A:ENSG00000178252 0.304041304 0.039514306  
0.781136655 0.36680942 0.650850274 0.813853703  
rs36133651:49183955:C:A ENSG00000178252  
rs7632267:49184664:G:A:ENSG00000178252 0.304041304 0.039514306  
0.781136655 0.36680942 0.655885306 0.813853703  
rs7632267:49184664:G:A ENSG00000178252  
rs4308307:49193216:C:T:ENSG00000178252 0.271758927 0.039514306  
0.739251903 0.326422852 0.54593522 0.813853703  
rs4308307:49193216:C:T ENSG00000178252  
rs1134043:49200137:G:T:ENSG00000178252 0.314613603 0.039514306  
0.753805316 0.445043357 0.690981753 0.813853703  
rs1134043:49200137:G:T ENSG00000178252  
rs4955419:49200692:T:A:ENSG00000178252 0.306174368 0.039514306  
0.777393854 0.36680942 0.650850274 0.813853703  
rs4955419:49200692:T:A ENSG00000178252  
rs4955420:49208865:T:C:ENSG00000178252 0.28152348 0.039514306  
0.725010873 0.441817908 0.690981753 0.813853703  
rs4955420:49208865:T:C ENSG00000178252

rs10865954:49211989:T:C:ENSG00000178252 0.28152348 0.039514306  
0.714717525 0.441817908 0.694942942 0.813853703  
rs10865954:49211989:T:C ENSG00000178252  
rs35545483:50806506:ATT:A:ENSG00000114738 0.035322296 0.039514306  
0.601406435 0.340834261 0.574209974 0.063994875  
rs35545483:50806506:ATT:A ENSG00000114738  
rs1542574:51395571:C:T:ENSG00000114738 0.23344096 0.039514306  
0.845255291 0.52264501 0.846769489 0.813853703  
rs1542574:51395571:C:T ENSG00000114738  
rs2241784:51418348:G:A:ENSG00000114738 0.27577637 0.039514306  
0.828327833 0.558498626 0.904520929 0.842355515  
rs2241784:51418348:G:A ENSG00000114738  
rs6772668:51460426:G:A:ENSG00000114738 0.289740841 0.039514306  
0.828327833 0.558498626 0.90539517 0.838148385  
rs6772668:51460426:G:A ENSG00000114738  
rs4687800:ENSG00000114738 0.290380371 0.039514306 0.828327833  
0.558498626 0.905940899 0.836643886 rs4687800 ENSG00000114738  
rs6445727:51484469:G:A:ENSG00000114738 0.290380371 0.039514306  
0.828327833 0.558498626 0.905940899 0.836643886  
rs6445727:51484469:G:A ENSG00000114738  
rs7623803:51529264:C:T:ENSG00000114738 0.278501935 0.039514306  
0.828327833 0.558498626 0.906417014 0.840209939  
rs7623803:51529264:C:T ENSG00000114738  
rs9866430:51591265:G:A:ENSG00000114738 0.291376195 0.039514306  
0.828327833 0.558498626 0.907164322 0.83617109  
rs9866430:51591265:G:A ENSG00000114738  
rs11719995:ENSG00000114738 0.290380371 0.039514306 0.828327833  
0.558498626 0.905940899 0.836643886 rs11719995 ENSG00000114738  
rs11709482:51594366:T:C:ENSG00000114738 0.290380371 0.039514306  
0.828327833 0.558498626 0.905940899 0.836643886  
rs11709482:51594366:T:C ENSG00000114738  
rs7628461:52272028:A:C:ENSG00000164088 0.035322296 0.089622533  
0.809704997 0.472415297 0.112902598 0.51457021  
rs7628461:52272028:A:C ENSG00000164088  
rs4082828:52274742:A:C:ENSG00000164088 0.035322296 0.039514306  
0.681949548 0.165229468 0.069942274 0.174366738  
rs4082828:52274742:A:C ENSG00000164088  
rs11719760:52276883:A:G:ENSG00000164088 0.035322296 0.039514306  
0.466752146 0.072575018 0.069942274 0.063994875  
rs11719760:52276883:A:G ENSG00000164088  
rs11711914:52276901:C:T:ENSG00000164088 0.035322296 0.039514306  
0.165546404 0.072575018 0.069942274 0.063994875  
rs11711914:52276901:C:T ENSG00000164088  
rs7638204:52278241:C:T:ENSG00000164088 0.035322296 0.110495165  
0.778199855 0.395341642 0.069942274 0.464247637  
rs7638204:52278241:C:T ENSG00000164088  
rs114645176:52279951:T:G:ENSG00000164088 0.035322296 0.039514306  
0.495886418 0.072575018 0.069942274 0.063994875  
rs114645176:52279951:T:G ENSG00000164088  
rs11715391:ENSG00000164088 0.035322296 0.039514306 0.666514548  
0.123210094 0.069942274 0.225997306 rs11715391 ENSG00000164088  
rs11706541:52286349:G:C:ENSG00000164088 0.035322296 0.039514306  
0.492105461 0.072575018 0.069942274 0.140342165  
rs11706541:52286349:G:C ENSG00000164088

rs73088773:52286585:G:A:ENSG00000164088 0.035322296 0.039514306 0.48190184  
0.123210094 0.069942274 0.140342165 rs73088773:52286585:G:A  
ENSG00000164088

3:52286894:CTTTTTTT:C:ENSG00000164088 0.035322296 0.039514306 0.50017961  
0.165229468 0.069942274 0.140342165 3:52286894:CTTTTTTT:C  
ENSG00000164088

rs1767:52290474:C:G:ENSG00000164088 0.035322296 0.039514306  
0.594989053 0.263905944 0.069942274 0.347302535 rs1767:52290474:C:G  
ENSG00000164088

rs1769:ENSG00000164088 0.035322296 0.039514306 0.42239248 0.072575018  
0.069942274 0.063994875 rs1769 ENSG00000164088

rs55847657:52293312:C:G:ENSG00000164088 0.035322296 0.039514306  
0.592067279 0.263905944 0.069942274 0.333543658  
rs55847657:52293312:C:G ENSG00000164088

JHU\_3.52293858:ENSG00000164088 0.035322296 0.039514306 0.492105461  
0.165229468 0.069942274 0.140342165 JHU\_3.52293858 ENSG00000164088

rs113895715:52294175:A:G:ENSG00000164088 0.035322296 0.039514306  
0.572955873 0.226823504 0.069942274 0.269135872  
rs113895715:52294175:A:G ENSG00000164088

rs140616356:52296022:T:G:T:ENSG00000164088 0.035322296 0.039514306  
0.581240934 0.123210094 0.069942274 0.333543658  
rs140616356:52296022:T:G:T ENSG00000164088

rs58531656:52298116:T:C:ENSG00000164088 0.035322296 0.039514306  
0.436932543 0.072575018 0.069942274 0.108665807  
rs58531656:52298116:T:C ENSG00000164088

rs60382084:52298161:C:A:ENSG00000164088 0.035322296 0.039514306  
0.581240934 0.123210094 0.069942274 0.319318857  
rs60382084:52298161:C:A ENSG00000164088

rs6793317:52298986:T:C:ENSG00000164088 0.035322296 0.039514306  
0.580001614 0.197042097 0.069942274 0.24867752  
rs6793317:52298986:T:C ENSG00000164088

rs7643913:52303213:G:A:ENSG00000164088 0.035322296 0.039514306 0.20393713  
0.072575018 0.069942274 0.063994875 rs7643913:52303213:G:A  
ENSG00000164088

rs11714358:52303600:G:C:ENSG00000164088 0.035322296 0.039514306 0.20393713  
0.072575018 0.069942274 0.063994875 rs11714358:52303600:G:C  
ENSG00000164088

rs73088783:52305286:C:T:ENSG00000164088 0.035322296 0.039514306 0.515964  
0.072575018 0.069942274 0.063994875 rs73088783:52305286:C:T  
ENSG00000164088

rs61644644:52307496:T:C:ENSG00000164088 0.035322296 0.039514306  
0.400191924 0.072575018 0.069942274 0.063994875  
rs61644644:52307496:T:C ENSG00000164088

rs6809248:52309338:A:G:ENSG00000164088 0.035322296 0.039514306  
0.618696386 0.350892299 0.069942274 0.419171564  
rs6809248:52309338:A:G ENSG00000164088

rs77020200:52312976:C:T:ENSG00000164088 0.035322296 0.039514306  
0.054815691 0.072575018 0.069942274 0.063994875  
rs77020200:52312976:C:T ENSG00000164088

rs73088785:52313214:T:G:ENSG00000164088 0.035322296 0.039514306 0.515964  
0.290136921 0.069942274 0.308405655 rs73088785:52313214:T:G  
ENSG00000164088



rs11718729:52313454:C:A:ENSG00000164088 0.035322296 0.039514306  
0.390230616 0.072575018 0.069942274 0.063994875  
rs11718729:52313454:C:A ENSG00000164088  
rs140771279:52318056:G:A:ENSG00000164088 0.035322296 0.039514306  
0.054815691 0.072575018 0.069942274 0.063994875  
rs140771279:52318056:G:A ENSG00000164088  
rs73088791:52318281:C:A:ENSG00000164088 0.035322296 0.039514306  
0.054815691 0.072575018 0.069942274 0.063994875  
rs73088791:52318281:C:A ENSG00000164088  
rs149148515:52321688:GA:G:ENSG00000164088 0.035322296 0.039514306  
0.054815691 0.072575018 0.069942274 0.063994875  
rs149148515:52321688:GA:G ENSG00000164088  
rs6783652:52323344:G:A:ENSG00000164088 0.035322296 0.039514306  
0.054815691 0.072575018 0.069942274 0.063994875  
rs6783652:52323344:G:A ENSG00000164088  
rs35976326:52325039:G:A:ENSG00000164088 0.035322296 0.039514306  
0.612361159 0.072575018 0.069942274 0.063994875  
rs35976326:52325039:G:A ENSG00000164088  
rs55676974:52328024:G:A:ENSG00000164088 0.035322296 0.039514306  
0.618696386 0.072575018 0.069942274 0.063994875  
rs55676974:52328024:G:A ENSG00000164088  
rs3733063:52328533:G:A:ENSG00000164088 0.035322296 0.039514306  
0.370396184 0.072575018 0.069942274 0.063994875  
rs3733063:52328533:G:A ENSG00000164088  
rs17052051:52331266:C:G:ENSG00000164088 0.035322296 0.039514306  
0.466752146 0.072575018 0.069942274 0.063994875  
rs17052051:52331266:C:G ENSG00000164088  
rs17052052:52331793:A:G:ENSG00000164088 0.035322296 0.039514306  
0.628654228 0.072575018 0.069942274 0.063994875  
rs17052052:52331793:A:G ENSG00000164088  
rs73088800:52332292:A:G:ENSG00000164088 0.035322296 0.039514306  
0.628654228 0.290136921 0.069942274 0.431187426  
rs73088800:52332292:A:G ENSG00000164088  
rs17052053:52334593:T:C:ENSG00000164088 0.035322296 0.12731097  
0.726206733 0.438119062 0.069942274 0.540231732  
rs17052053:52334593:T:C ENSG00000164088  
rs17052054:52337754:C:T:ENSG00000164088 0.035322296 0.039514306  
0.828327833 0.333474506 0.069942274 0.464247637  
rs17052054:52337754:C:T ENSG00000164088  
rs56352611:52338590:T:C:ENSG00000164088 0.035322296 0.039514306  
0.626808341 0.276782326 0.069942274 0.431187426  
rs56352611:52338590:T:C ENSG00000164088  
rs10460962:52343679:C:T:ENSG00000164088 0.035322296 0.039514306  
0.828327833 0.387628207 0.069942274 0.494607223  
rs10460962:52343679:C:T ENSG00000164088  
rs10461028:52343742:A:G:ENSG00000164088 0.035322296 0.039514306  
0.464882715 0.072575018 0.069942274 0.201281701  
rs10461028:52343742:A:G ENSG00000164088  
rs17052058:52344680:A:G:ENSG00000164088 0.035322296 0.039514306  
0.568513848 0.340834261 0.069942274 0.460921055  
rs17052058:52344680:A:G ENSG00000164088  
rs6445385:52345459:A:G:ENSG00000164088 0.035322296 0.039514306  
0.828327833 0.387628207 0.069942274 0.494607223  
rs6445385:52345459:A:G ENSG00000164088



rs17052061:52346240:T:G:ENSG00000164088 0.035322296 0.039514306  
0.557353332 0.276782326 0.069942274 0.374953256  
rs17052061:52346240:T:G ENSG00000164088  
rs111593386:52346730:G:T:ENSG00000164088 0.035322296 0.039514306  
0.775958292 0.414104514 0.069942274 0.511827661  
rs111593386:52346730:G:T ENSG00000164088  
rs6445386:ENSG00000164088 0.035322296 0.039514306 0.568513848  
0.340834261 0.069942274 0.460921055 rs6445386 ENSG00000164088  
rs55997317:52350745:G:A:ENSG00000164088 0.035322296 0.039514306 0.57027753  
0.333474506 0.069942274 0.457928806 rs55997317:52350745:G:A  
ENSG00000164088  
rs7615405:52351553:T:G:ENSG00000164088 0.035322296 0.039514306  
0.828327833 0.387628207 0.069942274 0.494607223  
rs7615405:52351553:T:G ENSG00000164088  
rs17052068:52352864:C:T:ENSG00000164088 0.035322296 0.039514306  
0.777393854 0.414104514 0.069942274 0.511827661  
rs17052068:52352864:C:T ENSG00000164088  
rs57441156:52354242:C:G:ENSG00000164088 0.035322296 0.039514306  
0.552896362 0.276782326 0.069942274 0.374953256  
rs57441156:52354242:C:G ENSG00000164088  
rs61150019:52354376:G:A:ENSG00000164088 0.035322296 0.039514306 0.57027753  
0.326422852 0.069942274 0.457928806 rs61150019:52354376:G:A  
ENSG00000164088  
rs55965068:52354432:A:G:ENSG00000164088 0.035322296 0.039514306 0.57027753  
0.333474506 0.069942274 0.457928806 rs55965068:52354432:A:G  
ENSG00000164088  
rs6763882:52354772:C:T:ENSG00000164088 0.035322296 0.039514306  
0.782196391 0.424824518 0.069942274 0.522761587  
rs6763882:52354772:C:T ENSG00000164088  
rs11707931:52358417:C:G:ENSG00000164088 0.035322296 0.039514306  
0.763265946 0.385352708 0.069942274 0.469127215  
rs11707931:52358417:C:G ENSG00000164088  
rs35133416:52359040:C:T:ENSG00000164088 0.035322296 0.039514306  
0.775958292 0.414104514 0.069942274 0.511827661  
rs35133416:52359040:C:T ENSG00000164088  
rs6796333:52359678:T:C:ENSG00000164088 0.035322296 0.039514306 0.57027753  
0.333474506 0.069942274 0.457928806 rs6796333:52359678:T:C  
ENSG00000164088  
rs11710014:52359972:C:T:ENSG00000164088 0.035322296 0.039514306  
0.828327833 0.390584104 0.069942274 0.494607223  
rs11710014:52359972:C:T ENSG00000164088  
rs34762015:52366044:G:A:ENSG00000164088 0.035322296 0.039514306  
0.568513848 0.340834261 0.069942274 0.460921055  
rs34762015:52366044:G:A ENSG00000164088  
rs2335640:52368387:T:C:ENSG00000164088 0.035322296 0.039514306  
0.761772115 0.387628207 0.069942274 0.469127215  
rs2335640:52368387:T:C ENSG00000164088  
rs34238085:52368947:A:C:ENSG00000164088 0.035322296 0.066642396  
0.760415187 0.358702521 0.069942274 0.471730191  
rs34238085:52368947:A:C ENSG00000164088  
rs13059674:52371789:T:G:ENSG00000164088 0.035322296 0.039514306  
0.568513848 0.340834261 0.069942274 0.460921055  
rs13059674:52371789:T:G ENSG00000164088

rs11706001:52372128:T:A:ENSG00000164088 0.035322296 0.039514306  
0.560108139 0.244282474 0.069942274 0.423659401  
rs11706001:52372128:T:A ENSG00000164088  
rs56357549:52374516:T:G:ENSG00000164088 0.035322296 0.039514306  
0.774918193 0.414104514 0.069942274 0.51457021  
rs56357549:52374516:T:G ENSG00000164088  
rs34523877:52375711:T:C:ENSG00000164088 0.035322296 0.039514306  
0.560108139 0.244282474 0.069942274 0.419171564  
rs34523877:52375711:T:C ENSG00000164088  
rs11718125:52379420:T:C:ENSG00000164088 0.035322296 0.039514306 0.20393713  
0.072575018 0.069942274 0.063994875 rs11718125:52379420:T:C  
ENSG00000164088  
rs11716017:52380991:C:T:ENSG00000164088 0.035322296 0.039514306  
0.238368074 0.072575018 0.069942274 0.140342165  
rs11716017:52380991:C:T ENSG00000164088  
rs34355561:52383120:G:A:ENSG00000164088 0.035322296 0.039514306  
0.562861286 0.072575018 0.069942274 0.319318857  
rs34355561:52383120:G:A ENSG00000164088  
rs34908451:52385115:C:T:ENSG00000164088 0.035322296 0.039514306  
0.238368074 0.072575018 0.069942274 0.140342165  
rs34908451:52385115:C:T ENSG00000164088  
rs11714402:52391735:A:C:ENSG00000164088 0.035322296 0.039514306  
0.238368074 0.072575018 0.069942274 0.140342165  
rs11714402:52391735:A:C ENSG00000164088  
rs11707864:52392877:G:A:ENSG00000164088 0.035322296 0.039514306  
0.238368074 0.072575018 0.069942274 0.24867752  
rs11707864:52392877:G:A ENSG00000164088  
rs56899118:52397419:G:A:ENSG00000164088 0.035322296 0.039514306  
0.640107889 0.072575018 0.069942274 0.319318857  
rs56899118:52397419:G:A ENSG00000164088  
rs73091168:52397701:G:A:ENSG00000164088 0.035322296 0.039514306  
0.618696386 0.072575018 0.069942274 0.201281701  
rs73091168:52397701:G:A ENSG00000164088  
rs13075370:52399278:G:A:ENSG00000164088 0.035322296 0.039514306  
0.511835264 0.072575018 0.069942274 0.174366738  
rs13075370:52399278:G:A ENSG00000164088  
rs11709658:52399627:G:A:ENSG00000164088 0.035322296 0.039514306  
0.562861286 0.072575018 0.069942274 0.319318857  
rs11709658:52399627:G:A ENSG00000164088  
rs3752819:52400740:G:C:ENSG00000164088 0.035322296 0.039514306  
0.238368074 0.072575018 0.069942274 0.140342165  
rs3752819:52400740:G:C ENSG00000164088  
rs13076890:52407933:T:C:ENSG00000164088 0.035322296 0.039514306  
0.562861286 0.072575018 0.069942274 0.319318857  
rs13076890:52407933:T:C ENSG00000164088  
rs67834575:52411929:T:A:ENSG00000164088 0.035322296 0.039514306  
0.222302049 0.072575018 0.069942274 0.140342165  
rs67834575:52411929:T:A ENSG00000164088  
rs67248391:52412006:A:T:ENSG00000164088 0.035322296 0.039514306  
0.222302049 0.072575018 0.069942274 0.140342165  
rs67248391:52412006:A:T ENSG00000164088  
rs11721277:52420901:G:A:ENSG00000164088 0.035322296 0.039514306  
0.614457891 0.072575018 0.069942274 0.225997306  
rs11721277:52420901:G:A ENSG00000164088

rs390802:52431671:G:A:ENSG00000164088 0.035322296 0.039514306  
0.054815691 0.072575018 0.069942274 0.269135872 rs390802:52431671:G:A  
ENSG00000164088

rs11711974:ENSG00000164088 0.035322296 0.039514306 0.580001614  
0.072575018 0.069942274 0.108665807 rs11711974 ENSG00000164088

rs56322342:52432610:G:A:ENSG00000164088 0.035322296 0.110495165 0.72386196  
0.263905944 0.069942274 0.510329036 rs56322342:52432610:G:A  
ENSG00000164088

rs123602:52442354:G:C:ENSG00000164088 0.035322296 0.316996396  
0.753805316 0.53594117 0.429827068 0.712706914 rs123602:52442354:G:C  
ENSG00000164088

rs82825:52471942:G:A:ENSG00000164088 0.035322296 0.359391426  
0.565079872 0.263905944 0.251839208 0.556049114 rs82825:52471942:G:A  
ENSG00000164088

rs2016575:52477080:T:C:ENSG00000164088 0.035322296 0.375516094  
0.568513848 0.263905944 0.288162171 0.52739468  
rs2016575:52477080:T:C ENSG00000164088

rs3821868:53891323:C:T:ENSG00000113812 0.515908395 0.039514306  
0.828327833 0.450346002 0.811065379 0.790913456  
rs3821868:53891323:C:T ENSG00000113812

rs3821869:53893840:C:A:ENSG00000113812 0.53589358 0.039514306  
0.718826765 0.450346002 0.498016841 0.60018511  
rs3821869:53893840:C:A ENSG00000113812

rs4687753:53895461:A:C:ENSG00000113812 0.515908395 0.039514306  
0.828327833 0.379688866 0.821841001 0.770988393  
rs4687753:53895461:A:C ENSG00000113812

rs9860367:53897929:A:C:ENSG00000113812 0.551395771 0.039514306 0.75319544  
0.498363812 0.608245709 0.705938854 rs9860367:53897929:A:C  
ENSG00000113812

JHU\_3.53910117:ENSG00000113812 0.529327391 0.039514306 0.660396949  
0.662029528 0.839071584 0.813853703 JHU\_3.53910117 ENSG00000113812

rs4681679:ENSG00000168291 0.390769583 0.039514306 0.793209929  
0.751091602 0.690981753 0.813853703 rs4681679 ENSG00000168291

rs4681845:58332496:C:T:ENSG00000168291 0.419607171 0.039514306  
0.826370376 0.760565179 0.767723787 0.795155854  
rs4681845:58332496:C:T ENSG00000168291

rs9881869:58333255:G:A:ENSG00000168291 0.390769583 0.039514306  
0.794505705 0.751091602 0.690981753 0.813853703  
rs9881869:58333255:G:A ENSG00000168291

rs4681847:58335308:G:C:ENSG00000168291 0.390769583 0.039514306  
0.797260875 0.747187568 0.694942942 0.813853703  
rs4681847:58335308:G:C ENSG00000168291

rs6775710:58336201:T:C:ENSG00000168291 0.390769583 0.039514306  
0.797260875 0.747187568 0.694942942 0.813853703  
rs6775710:58336201:T:C ENSG00000168291

rs6445973:58336595:C:A:ENSG00000168291 0.390769583 0.039514306  
0.797260875 0.747187568 0.694942942 0.813853703  
rs6445973:58336595:C:A ENSG00000168291

rs4681682:58337833:A:G:ENSG00000168291 0.390769583 0.039514306  
0.797260875 0.747187568 0.694942942 0.813853703  
rs4681682:58337833:A:G ENSG00000168291

rs55964615:58389120:A:T:ENSG00000168291 0.378927762 0.039514306  
0.792227512 0.751091602 0.690981753 0.813853703  
rs55964615:58389120:A:T ENSG00000168291

rs56198078:58392224:G:C:ENSG00000168291 0.381061816 0.039514306  
0.777393854 0.744127379 0.690981753 0.813853703  
rs56198078:58392224:G:C ENSG00000168291  
rs78369581:189146:A:C:ENSG00000250312 0.035322296 0.651399716  
0.184980376 0.650583802 0.395007577 0.749650459 rs78369581:189146:A:C  
ENSG00000250312  
rs35681707:2962452:C:T:ENSG00000125388 0.035322296 0.469499546  
0.827435543 0.774949478 0.848727643 0.827435076  
rs35681707:2962452:C:T ENSG00000125388  
rs200345387:2962603:CATT:C:ENSG00000125388 0.035322296 0.663028436  
0.841625184 0.744964321 0.825258108 0.813853703  
rs200345387:2962603:CATT:C ENSG00000125388  
rs16843684:2965676:C:T:ENSG00000125388 0.155490932 0.039514306 0.20393713  
0.301206855 0.7140776 0.517746279 rs16843684:2965676:C:T  
ENSG00000125388  
rs28666534:2971064:G:A:ENSG00000125388 0.219347314 0.039514306  
0.390230616 0.387628207 0.714300296 0.547086582  
rs28666534:2971064:G:A ENSG00000125388  
rs2471322:2974086:T:C:ENSG00000125388 0.271758927 0.039514306  
0.618696386 0.072575018 0.484480155 0.511827661 rs2471322:2974086:T:C  
ENSG00000125388  
rs2960303:2975804:C:T:ENSG00000125388 0.271758927 0.039514306  
0.618696386 0.072575018 0.484480155 0.511827661 rs2960303:2975804:C:T  
ENSG00000125388  
rs3021142:2977016:C:G:ENSG00000125388 0.18193752 0.039514306  
0.436932543 0.424824518 0.731870438 0.469127215 rs3021142:2977016:C:G  
ENSG00000125388  
rs3021141:2978523:C:A:ENSG00000125388 0.322853095 0.039514306  
0.269469279 0.358702521 0.608245709 0.60018511 rs3021141:2978523:C:A  
ENSG00000125388  
rs3021139:2978552:T:G:ENSG00000125388 0.146129194 0.039514306  
0.184980376 0.276782326 0.690981753 0.491393172 rs3021139:2978552:T:G  
ENSG00000125388  
rs3021138:2978620:T:C:ENSG00000125388 0.271758927 0.039514306  
0.618696386 0.072575018 0.484480155 0.511827661 rs3021138:2978620:T:C  
ENSG00000125388  
rs3021140:2979030:C:T:ENSG00000125388 0.155490932 0.039514306  
0.238368074 0.301206855 0.714300296 0.511827661 rs3021140:2979030:C:T  
ENSG00000125388  
rs2022485:ENSG00000125388 0.271758927 0.039514306 0.618696386  
0.072575018 0.484480155 0.511827661 rs2022485 ENSG00000125388  
rs2040061:2980455:T:C:ENSG00000125388 0.155490932 0.039514306  
0.238368074 0.301206855 0.714300296 0.511827661 rs2040061:2980455:T:C  
ENSG00000125388  
rs2185887:2981297:G:A:ENSG00000125388 0.155490932 0.039514306  
0.238368074 0.301206855 0.714300296 0.511827661 rs2185887:2981297:G:A  
ENSG00000125388  
rs2185888:2981553:A:C:ENSG00000125388 0.289740841 0.039514306  
0.626808341 0.263905944 0.54593522 0.550290331 rs2185888:2981553:A:C  
ENSG00000125388  
rs2471346:2983890:G:A:ENSG00000125388 0.155490932 0.039514306  
0.238368074 0.301206855 0.714300296 0.511827661 rs2471346:2983890:G:A  
ENSG00000125388

rs7667520:2984761:G:A:ENSG00000125388 0.28152348 0.039514306 0.6569085  
0.072575018 0.525520858 0.522761587 rs7667520:2984761:G:A  
ENSG00000125388

rs1419046:2986049:T:A:ENSG00000125388 0.271758927 0.039514306  
0.618696386 0.072575018 0.484480155 0.511827661 rs1419046:2986049:T:A  
ENSG00000125388

rs2960310:2986671:C:G:ENSG00000125388 0.271758927 0.039514306  
0.618696386 0.072575018 0.484480155 0.511827661 rs2960310:2986671:C:G  
ENSG00000125388

rs28414352:2987707:G:A:ENSG00000125388 0.146968287 0.039514306  
0.222302049 0.301206855 0.714300296 0.511827661  
rs28414352:2987707:G:A ENSG00000125388

rs143296789:2988007:CT:C:ENSG00000125388 0.271758927 0.039514306  
0.618696386 0.072575018 0.493250562 0.517746279  
rs143296789:2988007:CT:C ENSG00000125388

rs2471324:2988752:G:T:ENSG00000125388 0.146968287 0.039514306  
0.222302049 0.290136921 0.712624906 0.511827661 rs2471324:2988752:G:T  
ENSG00000125388

rs2051557:2990291:A:C:ENSG00000125388 0.146968287 0.039514306 0.20393713  
0.290136921 0.71243013 0.511827661 rs2051557:2990291:A:C  
ENSG00000125388

rs140315626:2990303:A:AAACAAAC:ENSG00000125388 0.146968287  
0.039514306 0.255451763 0.301206855 0.7140776 0.51457021  
rs140315626:2990303:A:AAACAAAC ENSG00000125388

rs2051556:2990338:G:T:ENSG00000125388 0.501944426 0.039514306  
0.466752146 0.491850645 0.844400328 0.681432383 rs2051556:2990338:G:T  
ENSG00000125388

rs2051555:ENSG00000125388 0.515908395 0.039514306 0.351078567  
0.486971863 0.90539517 0.650718924 rs2051555 ENSG00000125388

exm383568:ENSG00000125388 0.515908395 0.039514306 0.351078567  
0.486971863 0.904520929 0.645310165 exm383568 ENSG00000125388

rs2960307:2990824:A:G:ENSG00000125388 0.146968287 0.039514306  
0.184980376 0.290136921 0.704734536 0.503271951 rs2960307:2990824:A:G  
ENSG00000125388

rs2471340:2992341:G:T:ENSG00000125388 0.146968287 0.039514306  
0.184980376 0.290136921 0.704734536 0.503271951 rs2471340:2992341:G:T  
ENSG00000125388

rs2471339:2993035:T:A:ENSG00000125388 0.146968287 0.039514306  
0.184980376 0.276782326 0.701945326 0.501122218 rs2471339:2993035:T:A  
ENSG00000125388

rs2515942:2993423:C:G:ENSG00000125388 0.600934349 0.039514306  
0.605977561 0.36680942 0.769250833 0.692744521 rs2515942:2993423:C:G  
ENSG00000125388

rs2488816:2993706:A:G:ENSG00000125388 0.599992359 0.039514306  
0.608285859 0.358702521 0.767723787 0.692744521 rs2488816:2993706:A:G  
ENSG00000125388

rs55983725:2993724:CA:C:ENSG00000125388 0.146968287 0.039514306  
0.121437838 0.276782326 0.693223878 0.501122218  
rs55983725:2993724:CA:C ENSG00000125388

rs142185106:2993770:CT:C:ENSG00000125388 0.271758927 0.039514306  
0.560108139 0.072575018 0.544223189 0.540231732  
rs142185106:2993770:CT:C ENSG00000125388

rs2488817:2993791:G:C:ENSG00000125388 0.271758927 0.039514306  
0.557353332 0.072575018 0.526407644 0.532059322 rs2488817:2993791:G:C  
ENSG00000125388

rs2068134:26965942:A:G:ENSG00000240005 0.442515926 0.039514306  
0.429802874 0.558498626 0.420268827 0.677536379  
rs2068134:26965942:A:G ENSG00000240005

rs16878656:26966572:C:T:ENSG00000240005 0.441365231 0.039514306  
0.429802874 0.558498626 0.420268827 0.677536379  
rs16878656:26966572:C:T ENSG00000240005

rs140560183:26973583:T:G:ENSG00000240005 0.440655985 0.039514306  
0.42786084 0.558498626 0.403448628 0.674365303  
rs140560183:26973583:T:G ENSG00000240005

rs11940153:26987761:A:G:ENSG00000240005 0.437249414 0.039514306  
0.411358711 0.558498626 0.355219989 0.66629958  
rs11940153:26987761:A:G ENSG00000240005

rs11932732:26989454:G:A:ENSG00000240005 0.437249414 0.039514306  
0.411358711 0.558498626 0.355219989 0.664807456  
rs11932732:26989454:G:A ENSG00000240005

rs16878673:26996257:G:C:ENSG00000240005 0.437249414 0.039514306  
0.411358711 0.558498626 0.355219989 0.663342074  
rs16878673:26996257:G:C ENSG00000240005

rs16878678:26999810:T:C:ENSG00000240005 0.440655985 0.039514306  
0.411358711 0.558498626 0.355219989 0.661034047  
rs16878678:26999810:T:C ENSG00000240005

rs11943656:27002834:G:A:ENSG00000240005 0.441365231 0.039514306  
0.411358711 0.558498626 0.347424829 0.660124342  
rs11943656:27002834:G:A ENSG00000240005

rs78474797:27003606:G:A:ENSG00000240005 0.441365231 0.039514306  
0.411358711 0.558498626 0.347424829 0.660124342  
rs78474797:27003606:G:A ENSG00000240005

rs147979817:27008799:CT:C:ENSG00000240005 0.405404276 0.039514306  
0.411358711 0.558498626 0.526407644 0.652863919  
rs147979817:27008799:CT:C ENSG00000240005

JHU\_4.27008805:ENSG00000240005 0.322853095 0.039514306 0.411358711  
0.546358114 0.403448628 0.547086582 JHU\_4.27008805 ENSG00000240005

rs7689439:27009759:A:G:ENSG00000240005 0.441365231 0.039514306  
0.406502841 0.558498626 0.347424829 0.660124342  
rs7689439:27009759:A:G ENSG00000240005

rs16878692:27011792:G:A:ENSG00000240005 0.441365231 0.039514306  
0.411358711 0.558498626 0.347424829 0.660124342  
rs16878692:27011792:G:A ENSG00000240005

rs116752945:27012733:A:C:ENSG00000240005 0.441365231 0.039514306  
0.411358711 0.558498626 0.347424829 0.660124342  
rs116752945:27012733:A:C ENSG00000240005

rs74713405:27012971:T:C:ENSG00000240005 0.451006906 0.039514306  
0.454299825 0.558498626 0.328523647 0.681432383  
rs74713405:27012971:T:C ENSG00000240005

rs111622894:27016105:T:G:ENSG00000240005 0.494724773 0.039514306  
0.429802874 0.567983856 0.355219989 0.626470533  
rs111622894:27016105:T:G ENSG00000240005

rs7680703:27020719:G:T:ENSG00000240005 0.441365231 0.039514306  
0.411358711 0.558498626 0.347424829 0.660124342  
rs7680703:27020719:G:T ENSG00000240005



rs16878702:27023544:A:G:ENSG00000240005 0.441365231 0.039514306  
0.411358711 0.558498626 0.347424829 0.660124342  
rs16878702:27023544:A:G ENSG00000240005  
rs77694488:27023802:G:T:ENSG00000240005 0.441365231 0.039514306  
0.411358711 0.558498626 0.347424829 0.660124342  
rs77694488:27023802:G:T ENSG00000240005  
rs16878708:27031175:T:C:ENSG00000240005 0.441365231 0.039514306  
0.411358711 0.558498626 0.347424829 0.661034047  
rs16878708:27031175:T:C ENSG00000240005  
rs115928466:27038794:T:C:ENSG00000240005 0.441365231 0.039514306  
0.411358711 0.558498626 0.347424829 0.664807456  
rs115928466:27038794:T:C ENSG00000240005  
rs192073115:27041566:G:A:ENSG00000240005 0.437966338 0.039514306  
0.42786084 0.558498626 0.340307796 0.666738004  
rs192073115:27041566:G:A ENSG00000240005  
rs80236080:27042768:C:T:ENSG00000240005 0.441365231 0.039514306  
0.419451892 0.558498626 0.347424829 0.66629958  
rs80236080:27042768:C:T ENSG00000240005  
rs6824001:38872213:C:T:ENSG00000197712 0.081933656 0.039514306  
0.613735952 0.617124137 0.237095457 0.538926046  
rs6824001:38872213:C:T ENSG00000197712  
rs6828160:38872592:G:A:ENSG00000197712 0.146129194 0.039514306  
0.557353332 0.558498626 0.069942274 0.374953256  
rs6828160:38872592:G:A ENSG00000197712  
rs7663084:38874637:A:G:ENSG00000197712 0.196140407 0.039514306 0.65418952  
0.688857419 0.355219989 0.566496688 rs7663084:38874637:A:G  
ENSG00000197712  
rs7685725:38874645:C:T:ENSG00000197712 0.196140407 0.039514306 0.65418952  
0.688857419 0.355219989 0.566496688 rs7685725:38874645:C:T  
ENSG00000197712  
rs73236653:38875315:T:C:ENSG00000197712 0.146968287 0.039514306  
0.671660261 0.491850645 0.251839208 0.614118716  
rs73236653:38875315:T:C ENSG00000197712  
rs55860365:38875696:T:G:ENSG00000197712 0.146968287 0.039514306  
0.671660261 0.491850645 0.251839208 0.614118716  
rs55860365:38875696:T:G ENSG00000197712  
rs56220868:38875797:A:G:ENSG00000197712 0.175415731 0.039514306  
0.664963743 0.507376693 0.311775972 0.629719559  
rs56220868:38875797:A:G ENSG00000197712  
rs12505100:38875868:A:G:ENSG00000197712 0.175415731 0.039514306  
0.664963743 0.507376693 0.311775972 0.629184088  
rs12505100:38875868:A:G ENSG00000197712  
rs6827942:38876233:A:G:ENSG00000197712 0.200359533 0.039514306  
0.670633075 0.517229412 0.363699827 0.636576046  
rs6827942:38876233:A:G ENSG00000197712  
rs6851820:38876267:C:A:ENSG00000197712 0.271758927 0.039514306  
0.618696386 0.611407088 0.363699827 0.467974804  
rs6851820:38876267:C:A ENSG00000197712  
rs6838350:38876390:T:G:ENSG00000197712 0.200359533 0.039514306  
0.670633075 0.517229412 0.363699827 0.636576046  
rs6838350:38876390:T:G ENSG00000197712  
rs6838351:38876392:T:C:ENSG00000197712 0.271758927 0.039514306  
0.618696386 0.611407088 0.363699827 0.467974804  
rs6838351:38876392:T:C ENSG00000197712



rs6839212:38876823:T:G:ENSG00000197712 0.271758927 0.039514306  
0.618696386 0.610119762 0.363699827 0.467974804  
rs6839212:38876823:T:G ENSG00000197712  
rs6856696:38877085:G:C:ENSG00000197712 0.200359533 0.039514306  
0.667476732 0.517229412 0.363699827 0.636576046  
rs6856696:38877085:G:C ENSG00000197712  
rs6858492:38877256:C:T:ENSG00000197712 0.146968287 0.039514306  
0.671660261 0.491850645 0.251839208 0.614118716  
rs6858492:38877256:C:T ENSG00000197712  
rs6845518:38877457:T:C:ENSG00000197712 0.196140407 0.039514306 0.6569085  
0.685348652 0.355219989 0.566496688 rs6845518:38877457:T:C  
ENSG00000197712  
rs6814341:38877682:G:A:ENSG00000197712 0.146968287 0.039514306  
0.671660261 0.491850645 0.251839208 0.614118716  
rs6814341:38877682:G:A ENSG00000197712  
rs12508035:38877720:T:C:ENSG00000197712 0.146968287 0.039514306  
0.655792554 0.491850645 0.251839208 0.605346151  
rs12508035:38877720:T:C ENSG00000197712  
rs12507190:38877724:A:G:ENSG00000197712 0.146968287 0.039514306  
0.655792554 0.491850645 0.251839208 0.605346151  
rs12507190:38877724:A:G ENSG00000197712  
rs73236656:38877816:G:A:ENSG00000197712 0.146968287 0.039514306  
0.655792554 0.491850645 0.251839208 0.603453089  
rs73236656:38877816:G:A ENSG00000197712  
rs12508175:38878071:T:C:ENSG00000197712 0.146968287 0.039514306 0.65652076  
0.491850645 0.251839208 0.605346151 rs12508175:38878071:T:C  
ENSG00000197712  
rs12510824:38878072:G:A:ENSG00000197712 0.175415731 0.039514306  
0.670633075 0.498363812 0.328523647 0.631825967  
rs12510824:38878072:G:A ENSG00000197712  
4:38878079:A:ACC:ENSG00000197712 0.175415731 0.039514306 0.670633075  
0.498363812 0.328523647 0.629184088 4:38878079:A:ACC ENSG00000197712  
4:38878080:T:A:ENSG00000197712 0.146968287 0.039514306 0.671660261  
0.491850645 0.251839208 0.614118716 4:38878080:T:A ENSG00000197712  
4:38878082:GCA:G:ENSG00000197712 0.146968287 0.039514306 0.671660261  
0.491850645 0.251839208 0.614118716 4:38878082:GCA:G ENSG00000197712  
4:38878087:C:A:ENSG00000197712 0.146968287 0.039514306 0.667476732  
0.491850645 0.266901314 0.611611212 4:38878087:C:A ENSG00000197712  
4:38878088:T:G:ENSG00000197712 0.146968287 0.039514306 0.667476732  
0.491850645 0.266901314 0.611611212 4:38878088:T:G ENSG00000197712  
JHU\_4.38878093:ENSG00000197712 0.146968287 0.039514306 0.671660261  
0.491850645 0.251839208 0.614118716 JHU\_4.38878093 ENSG00000197712  
rs59944943:38878387:A:G:ENSG00000197712 0.18193752 0.039514306  
0.709425259 0.548833684 0.328523647 0.682445152  
rs59944943:38878387:A:G ENSG00000197712  
rs56229790:38878480:T:C:ENSG00000197712 0.146968287 0.039514306  
0.672834733 0.491850645 0.266901314 0.615926697  
rs56229790:38878480:T:C ENSG00000197712  
rs6821490:38878884:G:A:ENSG00000197712 0.146968287 0.039514306  
0.671660261 0.491850645 0.251839208 0.614118716  
rs6821490:38878884:G:A ENSG00000197712  
rs6848179:38878983:A:C:ENSG00000197712 0.23524183 0.039514306  
0.605977561 0.608765679 0.266901314 0.390568128  
rs6848179:38878983:A:C ENSG00000197712

rs113044414:38879286:TA:T:ENSG00000197712 0.23524183 0.039514306  
0.605977561 0.608765679 0.266901314 0.390568128  
rs113044414:38879286:TA:T ENSG00000197712  
rs6822313:38879312:G:A:ENSG00000197712 0.146968287 0.039514306  
0.671660261 0.491850645 0.251839208 0.614118716  
rs6822313:38879312:G:A ENSG00000197712  
rs112339360:38879448:C:G:ENSG00000197712 0.146968287 0.039514306  
0.671660261 0.491850645 0.251839208 0.614118716  
rs112339360:38879448:C:G ENSG00000197712  
rs138127331:38879500:G:A:ENSG00000197712 0.146968287 0.039514306  
0.671660261 0.491850645 0.251839208 0.614118716  
rs138127331:38879500:G:A ENSG00000197712  
rs142895065:38879540:A:G:ENSG00000197712 0.146968287 0.039514306  
0.671660261 0.491850645 0.251839208 0.614118716  
rs142895065:38879540:A:G ENSG00000197712  
rs113901907:38879581:G:A:ENSG00000197712 0.146968287 0.039514306  
0.671660261 0.491850645 0.251839208 0.614118716  
rs113901907:38879581:G:A ENSG00000197712  
rs73236661:38879655:C:T:ENSG00000197712 0.146968287 0.039514306  
0.671660261 0.491850645 0.251839208 0.614118716  
rs73236661:38879655:C:T ENSG00000197712  
rs11096964:ENSG00000197712 0.162871942 0.039514306 0.655792554  
0.491850645 0.300892226 0.611611212 rs11096964 ENSG00000197712  
exm394963:ENSG00000197712 0.162871942 0.039514306 0.65652076  
0.491850645 0.300892226 0.613318589 exm394963 ENSG00000197712  
rs11943209:38880136:A:T:ENSG00000197712 0.162871942 0.039514306  
0.655792554 0.491850645 0.300892226 0.611611212  
rs11943209:38880136:A:T ENSG00000197712  
rs11938589:38880167:C:T:ENSG00000197712 0.146968287 0.039514306  
0.671660261 0.491850645 0.251839208 0.614118716  
rs11938589:38880167:C:T ENSG00000197712  
rs111676993:38880181:A:ATGTGT:ENSG00000197712 0.18193752 0.039514306  
0.664963743 0.491850645 0.311775972 0.631825967  
rs111676993:38880181:A:ATGTGT ENSG00000197712  
rs11944231:38880384:A:G:ENSG00000197712 0.146968287 0.039514306  
0.671660261 0.491850645 0.251839208 0.615926697  
rs11944231:38880384:A:G ENSG00000197712  
rs73236662:38880793:T:G:ENSG00000197712 0.146968287 0.039514306  
0.671660261 0.491850645 0.251839208 0.615926697  
rs73236662:38880793:T:G ENSG00000197712  
rs55808427:38881188:G:A:ENSG00000197712 0.081933656 0.039514306  
0.628778955 0.463396258 0.148497947 0.556049114  
rs55808427:38881188:G:A ENSG00000197712  
rs56069076:38881244:C:T:ENSG00000197712 0.169284753 0.039514306  
0.674762224 0.509242766 0.279727316 0.621465342  
rs56069076:38881244:C:T ENSG00000197712  
rs113121070:38881265:A:AGCCC:ENSG00000197712 0.169284753 0.039514306  
0.674762224 0.509242766 0.279727316 0.621465342  
rs113121070:38881265:A:AGCCC ENSG00000197712  
rs11939674:38881363:T:G:ENSG00000197712 0.169284753 0.039514306  
0.674762224 0.503364172 0.288162171 0.623586162  
rs11939674:38881363:T:G ENSG00000197712

rs11942839:38881422:G:A:ENSG00000197712 0.169284753 0.039514306  
0.674762224 0.503364172 0.288162171 0.623586162  
rs11942839:38881422:G:A ENSG00000197712  
rs2890686:38881505:T:C:ENSG00000197712 0.169284753 0.039514306  
0.674762224 0.503364172 0.288162171 0.623586162  
rs2890686:38881505:T:C ENSG00000197712  
rs60653462:38881695:TAAATA:T:ENSG00000197712 0.23344096 0.039514306  
0.605977561 0.608765679 0.266901314 0.390568128  
rs60653462:38881695:TAAATA:T ENSG00000197712  
rs202022720:38881716:A:G:ENSG00000197712 0.23344096 0.039514306  
0.605977561 0.608765679 0.266901314 0.390568128  
rs202022720:38881716:A:G ENSG00000197712  
rs200073327:38881718:A:G:ENSG00000197712 0.239371492 0.039514306  
0.611290285 0.613788364 0.266901314 0.401203391  
rs200073327:38881718:A:G ENSG00000197712  
rs3955033:38881721:A:G:ENSG00000197712 0.271758927 0.039514306  
0.618696386 0.617124137 0.355219989 0.471730191  
rs3955033:38881721:A:G ENSG00000197712  
rs11938910:38881940:A:G:ENSG00000197712 0.169284753 0.039514306  
0.674868706 0.512101623 0.300892226 0.619162849  
rs11938910:38881940:A:G ENSG00000197712  
rs2381346:38882029:C:T:ENSG00000197712 0.175415731 0.039514306  
0.679533134 0.509242766 0.279727316 0.617532259  
rs2381346:38882029:C:T ENSG00000197712  
rs752193:38882306:A:G:ENSG00000197712 0.175415731 0.039514306  
0.679533134 0.509242766 0.279727316 0.617532259 rs752193:38882306:A:G  
ENSG00000197712  
rs4370143:38883079:C:T:ENSG00000197712 0.169284753 0.039514306  
0.674762224 0.505302083 0.288162171 0.623586162  
rs4370143:38883079:C:T ENSG00000197712  
rs11944515:38883305:G:C:ENSG00000197712 0.132837758 0.039514306  
0.637161235 0.491850645 0.173591669 0.597837774  
rs11944515:38883305:G:C ENSG00000197712  
rs11942199:38883394:T:C:ENSG00000197712 0.146129194 0.039514306 0.65652076  
0.503364172 0.218559406 0.613318589 rs11942199:38883394:T:C  
ENSG00000197712  
rs56320435:38883789:C:T:ENSG00000197712 0.200359533 0.039514306  
0.580001614 0.563128951 0.198669295 0.374953256  
rs56320435:38883789:C:T ENSG00000197712  
rs376803694:38883890:A:G:ENSG00000197712 0.155490932 0.039514306  
0.657729896 0.530641947 0.279727316 0.66629958  
rs376803694:38883890:A:G ENSG00000197712  
rs60780211:38883899:G:C:ENSG00000197712 0.200359533 0.039514306  
0.663257863 0.558498626 0.371793022 0.631825967  
rs60780211:38883899:G:C ENSG00000197712  
rs2890684:38884419:A:G:ENSG00000197712 0.117465891 0.039514306  
0.637161235 0.491850645 0.173591669 0.60018511  
rs2890684:38884419:A:G ENSG00000197712  
rs2890683:38884514:A:G:ENSG00000197712 0.196140407 0.039514306  
0.581240934 0.562100022 0.173591669 0.308405655  
rs2890683:38884514:A:G ENSG00000197712  
rs58419357:38884626:CT:C:ENSG00000197712 0.117465891 0.039514306  
0.638829519 0.491850645 0.173591669 0.597837774  
rs58419357:38884626:CT:C ENSG00000197712

rs766491:38885256:G:A:ENSG00000197712 0.117465891 0.039514306  
0.640107889 0.491850645 0.173591669 0.593888412 rs766491:38885256:G:A  
ENSG00000197712

rs7655069:38886143:A:G:ENSG00000197712 0.100009087 0.039514306  
0.637161235 0.491850645 0.173591669 0.586168441  
rs7655069:38886143:A:G ENSG00000197712

rs7676710:38886293:G:A:ENSG00000197712 0.100009087 0.039514306  
0.636111583 0.491850645 0.173591669 0.586168441  
rs7676710:38886293:G:A ENSG00000197712

rs7681448:38886393:G:C:ENSG00000197712 0.146129194 0.039514306  
0.641688238 0.491850645 0.218559406 0.603453089  
rs7681448:38886393:G:C ENSG00000197712

rs7681449:38886394:G:T:ENSG00000197712 0.146129194 0.039514306  
0.649343605 0.491850645 0.218559406 0.58035006  
rs7681449:38886394:G:T ENSG00000197712

rs7682017:38886665:G:A:ENSG00000197712 0.100009087 0.039514306  
0.641688238 0.491850645 0.173591669 0.566496688  
rs7682017:38886665:G:A ENSG00000197712

rs7683481:38886737:C:T:ENSG00000197712 0.100009087 0.039514306  
0.640107889 0.491850645 0.173591669 0.566496688  
rs7683481:38886737:C:T ENSG00000197712

rs7682238:38886782:G:A:ENSG00000197712 0.100009087 0.039514306  
0.634291162 0.491850645 0.173591669 0.563139599  
rs7682238:38886782:G:A ENSG00000197712

rs143373571:107226452:GAAT:G:ENSG00000145348 0.035322296 0.624868528  
0.828327833 0.558498626 0.89883587 0.813853703  
rs143373571:107226452:GAAT:G ENSG00000145348

rs61256759:107234345:C:A:ENSG00000145348 0.035322296 0.639358547  
0.828327833 0.558498626 0.905434766 0.813853703  
rs61256759:107234345:C:A ENSG00000145348

rs4833849:123889757:C:T:ENSG00000145375 0.215796307 0.039514306  
0.575705306 0.399004389 0.173591669 0.174366738  
rs4833849:123889757:C:T ENSG00000145375

rs2136425:123894585:C:G:ENSG00000145375 0.200359533 0.039514306  
0.568513848 0.395341642 0.112902598 0.174366738  
rs2136425:123894585:C:G ENSG00000145375

rs4833850:123896054:C:T:ENSG00000145375 0.190392053 0.039514306  
0.568513848 0.387628207 0.112902598 0.140342165  
rs4833850:123896054:C:T ENSG00000145375

rs7662778:123903239:T:G:ENSG00000145375 0.200359533 0.039514306  
0.568513848 0.395341642 0.112902598 0.174366738  
rs7662778:123903239:T:G ENSG00000145375

rs7662961:123903349:T:G:ENSG00000145375 0.200359533 0.039514306  
0.568513848 0.395341642 0.112902598 0.174366738  
rs7662961:123903349:T:G ENSG00000145375

rs2390448:123904310:G:A:ENSG00000145375 0.200359533 0.039514306  
0.568513848 0.395341642 0.112902598 0.174366738  
rs2390448:123904310:G:A ENSG00000145375

rs35146974:123945459:CA:C:ENSG00000145375 0.243759522 0.039514306  
0.5196698 0.438119062 0.198669295 0.201281701  
rs35146974:123945459:CA:C ENSG00000145375

rs11293425:153635539:TA:T:ENSG00000170006 0.035322296 0.33968813  
0.507796015 0.558498626 0.288162171 0.497503372  
rs11293425:153635539:TA:T ENSG00000170006

rs832560:56124423:T:A:ENSG00000155542 0.132837758 0.039514306  
0.839186759 0.603611735 0.714300296 0.684588293 rs832560:56124423:T:A  
ENSG00000155542  
rs252895:ENSG00000155542 0.448677976 0.039514306 0.853698456  
0.709051726 0.87814657 0.842114526 rs252895 ENSG00000155542  
rs2662022:56261491:G:A:ENSG00000155542 0.410204038 0.039514306  
0.828327833 0.588441466 0.57001038 0.819585067  
rs2662022:56261491:G:A ENSG00000155542  
rs2662021:56261691:G:A:ENSG00000155542 0.42756707 0.039514306  
0.828327833 0.603611735 0.603710229 0.813853703  
rs2662021:56261691:G:A ENSG00000155542  
rs832403:ENSG00000155542 0.451006906 0.039514306 0.828327833  
0.697988141 0.746195972 0.832678767 rs832403 ENSG00000155542  
rs7447816:68679822:G:A:ENSG00000152939 0.035322296 0.654488658  
0.618696386 0.072575018 0.455878819 0.24867752  
rs7447816:68679822:G:A ENSG00000152939  
rs2439722:68734401:T:C:ENSG00000152939 0.035322296 0.651399716  
0.580001614 0.072575018 0.395007577 0.140342165  
rs2439722:68734401:T:C ENSG00000152939  
rs62371717:68735112:T:C:ENSG00000152939 0.035322296 0.651399716  
0.580001614 0.072575018 0.395007577 0.140342165  
rs62371717:68735112:T:C ENSG00000152939  
rs1230365:96214659:G:A:ENSG00000164308 0.035322296 0.653732824  
0.778199855 0.746343751 0.690981753 0.6481702  
rs1230365:96214659:G:A ENSG00000164308  
rs10776775:114436482:G:A:ENSG00000134262 0.100009087 0.039514306  
0.165546404 0.36680942 0.069942274 0.063994875  
rs10776775:114436482:G:A ENSG00000134262  
rs10745340:ENSG00000134262 0.100009087 0.039514306 0.14398786  
0.301206855 0.069942274 0.063994875 rs10745340 ENSG00000134262  
rs61206874:118979864:C:T:ENSG00000172869 0.326821943 0.039514306  
0.72386196 0.484670506 0.9305498 0.80054243  
rs61206874:118979864:C:T ENSG00000172869  
rs919755:139831139:G:A:ENSG00000213523 0.23344096 0.039514306  
0.090437058 0.530641947 0.279727316 0.390568128  
rs919755:139831139:G:A ENSG00000213523  
rs143581589:139834570:G:GAA:ENSG00000213523 0.035322296 0.039514306  
0.436932543 0.558498626 0.069942274 0.319318857  
rs143581589:139834570:G:GAA ENSG00000213523  
rs250431:139940233:G:A:ENSG00000213523 0.146968287 0.039514306  
0.054815691 0.491850645 0.069942274 0.282646046  
rs250431:139940233:G:A ENSG00000213523  
rs60495862:10688366:C:CCTT:ENSG00000137434 0.035322296 0.624238809  
0.762115044 0.442167795 0.938476707 0.682445152  
rs60495862:10688366:C:CCTT ENSG00000137434  
rs9348641:10688443:T:A:ENSG00000137434 0.035322296 0.655089161  
0.642599458 0.333474506 0.9402585 0.749911035  
rs9348641:10688443:T:A ENSG00000137434  
rs9467252:10694808:A:G:ENSG00000137434 0.035322296 0.651399716  
0.828327833 0.441817908 0.860493302 0.789755639  
rs9467252:10694808:A:G ENSG00000137434  
rs10440821:10699156:A:G:ENSG00000137434 0.035322296 0.623013991  
0.828327833 0.408307051 0.824032297 0.771651952  
rs10440821:10699156:A:G ENSG00000137434

rs2760154:24475899:C:T:ENSG00000112294 0.480140265 0.039514306  
0.360243455 0.569579255 0.599377315 0.813853703  
rs2760154:24475899:C:T ENSG00000112294  
rs2744575:24494975:C:G:ENSG00000112294 0.560029788 0.039514306 0.14398786  
0.558498626 0.490050927 0.813853703 rs2744575:24494975:C:G  
ENSG00000112294  
rs2817213:ENSG00000112294 0.582267342 0.039514306 0.054815691  
0.558498626 0.636822477 0.813853703 rs2817213 ENSG00000112294  
rs2744577:24498052:G:A:ENSG00000112294 0.584874096 0.039514306  
0.054815691 0.558498626 0.636822477 0.813853703  
rs2744577:24498052:G:A ENSG00000112294  
rs2744578:24499157:T:C:ENSG00000112294 0.584874096 0.039514306  
0.054815691 0.558498626 0.636822477 0.813853703  
rs2744578:24499157:T:C ENSG00000112294  
rs7775307:24499469:G:A:ENSG00000112294 0.584625587 0.039514306  
0.054815691 0.558498626 0.636822477 0.813853703  
rs7775307:24499469:G:A ENSG00000112294  
rs7775073:24499551:A:G:ENSG00000112294 0.606481133 0.039514306  
0.054815691 0.558498626 0.54593522 0.798338031  
rs7775073:24499551:A:G ENSG00000112294  
rs11315269:24499688:AT:A:ENSG00000112294 0.584625587 0.039514306  
0.054815691 0.558498626 0.636822477 0.813853703  
rs11315269:24499688:AT:A ENSG00000112294  
rs11315270:24499787:AT:A:ENSG00000112294 0.585561531 0.039514306  
0.054815691 0.558498626 0.636822477 0.813853703  
rs11315270:24499787:AT:A ENSG00000112294  
rs12190926:24500078:G:A:ENSG00000112294 0.585881681 0.039514306  
0.090437058 0.558498626 0.636822477 0.813853703  
rs12190926:24500078:G:A ENSG00000112294  
rs13193549:24500147:G:A:ENSG00000112294 0.585303959 0.039514306  
0.054815691 0.558498626 0.636822477 0.813853703  
rs13193549:24500147:G:A ENSG00000112294  
rs2760129:24500368:T:G:ENSG00000112294 0.584140143 0.039514306  
0.090437058 0.558498626 0.629639249 0.813853703  
rs2760129:24500368:T:G ENSG00000112294  
rs2817216:24500832:G:A:ENSG00000112294 0.582488913 0.039514306  
0.090437058 0.558498626 0.617728871 0.813853703  
rs2817216:24500832:G:A ENSG00000112294  
rs2744579:24501000:A:C:ENSG00000112294 0.581188306 0.039514306  
0.054815691 0.558498626 0.625064162 0.813853703  
rs2744579:24501000:A:C ENSG00000112294  
rs2245674:24501421:C:T:ENSG00000112294 0.579526203 0.039514306  
0.054815691 0.558498626 0.617728871 0.813853703  
rs2245674:24501421:C:T ENSG00000112294  
rs6913746:29495815:T:C:ENSG00000213886 0.035322296 0.039514306  
0.054815691 0.197042097 0.069942274 0.063994875  
rs6913746:29495815:T:C ENSG00000213886  
rs6456964:ENSG00000213886 0.035322296 0.039514306 0.054815691  
0.197042097 0.069942274 0.063994875 rs6456964 ENSG00000213886  
rs17184255:29521289:C:G:ENSG00000213886 0.035322296 0.039514306  
0.054815691 0.165229468 0.069942274 0.063994875  
rs17184255:29521289:C:G ENSG00000213886



rs16895067:29521516:A:G:ENSG00000213886 0.035322296 0.039514306  
0.054815691 0.165229468 0.069942274 0.063994875  
rs16895067:29521516:A:G ENSG00000213886  
rs16895070:29521557:T:C:ENSG00000213886 0.035322296 0.039514306  
0.054815691 0.165229468 0.069942274 0.063994875  
rs16895070:29521557:T:C ENSG00000213886  
rs2294746:29521676:C:T:ENSG00000213886 0.035322296 0.039514306  
0.054815691 0.123210094 0.069942274 0.063994875  
rs2294746:29521676:C:T ENSG00000213886  
rs2294744:29522202:C:A:ENSG00000213886 0.035322296 0.039514306  
0.054815691 0.123210094 0.069942274 0.063994875  
rs2294744:29522202:C:A ENSG00000213886  
rs6915177:ENSG00000213886 0.060909118 0.039514306 0.090437058  
0.263905944 0.112902598 0.108665807 rs6915177 ENSG00000213886  
exm526101:ENSG00000213886 0.081933656 0.039514306 0.121437838  
0.197042097 0.148497947 0.063994875 exm526101 ENSG00000213886  
rs2076487:29523859:G:C:ENSG00000213886 0.060909118 0.039514306  
0.090437058 0.276782326 0.112902598 0.108665807  
rs2076487:29523859:G:C ENSG00000213886  
exm526112:ENSG00000213886 0.035322296 0.039514306 0.054815691  
0.072575018 0.069942274 0.063994875 exm526112 ENSG00000213886  
rs2076484:ENSG00000213886 0.060909118 0.039514306 0.090437058  
0.276782326 0.112902598 0.108665807 rs2076484 ENSG00000213886  
rs11970429:29526214:G:A:ENSG00000213886 0.060909118 0.039514306  
0.090437058 0.276782326 0.112902598 0.108665807  
rs11970429:29526214:G:A ENSG00000213886  
rs11970475:29526377:G:A:ENSG00000213886 0.060909118 0.039514306  
0.090437058 0.276782326 0.112902598 0.108665807  
rs11970475:29526377:G:A ENSG00000213886  
rs59731351:29526491:G:T:ENSG00000213886 0.060909118 0.039514306  
0.090437058 0.276782326 0.112902598 0.108665807  
rs59731351:29526491:G:T ENSG00000213886  
rs57241384:29526520:A:G:ENSG00000213886 0.060909118 0.039514306  
0.090437058 0.276782326 0.112902598 0.108665807  
rs57241384:29526520:A:G ENSG00000213886  
rs59802757:29526615:A:G:ENSG00000213886 0.035322296 0.039514306  
0.054815691 0.072575018 0.069942274 0.063994875  
rs59802757:29526615:A:G ENSG00000213886  
exm2270461:ENSG00000213886 0.060909118 0.039514306 0.090437058  
0.276782326 0.112902598 0.108665807 exm2270461 ENSG00000213886  
rs9461538:29530027:A:G:ENSG00000213886 0.035322296 0.039514306  
0.090437058 0.226823504 0.112902598 0.108665807  
rs9461538:29530027:A:G ENSG00000213886  
rs140941628:29606020:C:T:ENSG00000227262 0.035322296 0.145249232  
0.054815691 0.350892299 0.679445541 0.503271951  
rs140941628:29606020:C:T ENSG00000227262  
rs147147780:29606832:G:A:ENSG00000227262 0.035322296 0.159643516  
0.090437058 0.314254491 0.655885306 0.52739468  
rs147147780:29606832:G:A ENSG00000227262  
rs396660:ENSG00000204644 0.035322296 0.089622533 0.054815691 0.36680942  
0.525520858 0.225997306 rs396660 ENSG00000204644  
rs445150:ENSG00000204644 0.035322296 0.089622533 0.054815691 0.36680942  
0.532319281 0.225997306 rs445150 ENSG00000204644

rs2747430:29648506:G:A:ENSG00000204644 0.035322296 0.066642396  
0.054815691 0.340834261 0.493250562 0.174366738  
rs2747430:29648506:G:A ENSG00000204644  
rs28552659:29818132:G:A:ENSG00000230521 0.035322296 0.481993971  
0.580001614 0.197042097 0.173591669 0.295623551  
rs28552659:29818132:G:A ENSG00000230521  
rs73725438:29829507:T:A:ENSG00000227262 0.035322296 0.159643516  
0.381585774 0.491850645 0.734695661 0.672369682  
rs73725438:29829507:T:A ENSG00000227262  
JHU\_6.29830129:ENSG00000227262 0.035322296 0.219098289 0.429802874  
0.491850645 0.767723787 0.692744521 JHU\_6.29830129 ENSG00000227262  
JHU\_6.29833641:ENSG00000227262 0.035322296 0.219098289 0.429802874  
0.491850645 0.767723787 0.692744521 JHU\_6.29833641 ENSG00000227262  
rs77314501:29898397:G:A:ENSG00000204632 0.035322296 0.651399716  
0.835088246 0.753959404 0.845554455 0.308405655  
rs77314501:29898397:G:A ENSG00000204632  
rs9260103:29909593:T:G:ENSG00000227262 0.563836278 0.039514306  
0.775958292 0.756231687 0.802515582 0.725555765  
rs9260103:29909593:T:G ENSG00000227262  
rs41561116:29910473:G:A:ENSG00000230521 0.035322296 0.257351931  
0.495886418 0.072575018 0.069942274 0.201281701  
rs41561116:29910473:G:A ENSG00000230521  
rs41549214:29910506:G:T:ENSG00000231074 0.485584445 0.039514306  
0.580001614 0.620186274 0.112902598 0.174366738  
rs41549214:29910506:G:T ENSG00000231074  
rs199474430:29910725:C:G:ENSG00000230521 0.035322296 0.219098289  
0.531748779 0.072575018 0.069942274 0.140342165  
rs199474430:29910725:C:G ENSG00000230521  
rs41545815:29910947:T:A:ENSG00000230521 0.035322296 0.248891879  
0.495886418 0.072575018 0.069942274 0.201281701  
rs41545815:29910947:T:A ENSG00000230521  
rs41552627:29910980:C:T:ENSG00000204632 0.035322296 0.651399716  
0.796206463 0.757155561 0.920590777 0.358316132  
rs41552627:29910980:C:T ENSG00000204632  
rs41552627:29910980:C:T:ENSG00000231074 0.515193516 0.039514306  
0.618696386 0.671388768 0.311775972 0.382106273  
rs41552627:29910980:C:T ENSG00000231074  
rs9256982:29911000:T:C:ENSG00000230795 0.516693495 0.039514306 0.57027753  
0.165229468 0.355219989 0.358316132 rs9256982:29911000:T:C  
ENSG00000230795  
rs9260152:29911037:G:C:ENSG00000204622 0.035322296 0.229789644  
0.618696386 0.558498626 0.690981753 0.562535698  
rs9260152:29911037:G:C ENSG00000204622  
rs1136697:29911069:A:T:ENSG00000230521 0.035322296 0.174910011  
0.429802874 0.072575018 0.069942274 0.063994875  
rs1136697:29911069:A:T ENSG00000230521  
rs41540615:29911112:C:T:ENSG00000204632 0.035322296 0.651399716  
0.812077641 0.751091602 0.90539517 0.319318857  
rs41540615:29911112:C:T ENSG00000204632  
rs41540615:29911112:C:T:ENSG00000231074 0.48524743 0.039514306 0.59267775  
0.646163083 0.112902598 0.174366738 rs41540615:29911112:C:T  
ENSG00000231074

rs41540315:29911113:C:G:ENSG00000204632 0.035322296 0.651399716  
0.812077641 0.751091602 0.905434766 0.347302535  
rs41540315:29911113:C:G ENSG00000204632  
rs41540315:29911113:C:G:ENSG00000231074 0.48524743 0.039514306 0.59314904  
0.646163083 0.112902598 0.174366738 rs41540315:29911113:C:G  
ENSG00000231074  
rs12721717:29911115:G:A:ENSG00000204632 0.035322296 0.651399716  
0.809704997 0.751091602 0.900733954 0.295623551  
rs12721717:29911115:G:A ENSG00000204632  
rs12721717:29911115:G:A:ENSG00000231074 0.48524743 0.039514306  
0.604215794 0.642470662 0.112902598 0.201281701  
rs12721717:29911115:G:A ENSG00000231074  
rs3173419:29911119:G:C:ENSG00000204632 0.035322296 0.651399716  
0.814800802 0.751091602 0.905940899 0.347302535  
rs3173419:29911119:G:C ENSG00000204632  
rs3173419:29911119:G:C:ENSG00000231074 0.48524743 0.039514306 0.5960947  
0.642470662 0.148497947 0.225997306 rs3173419:29911119:G:C  
ENSG00000231074  
rs9256983:29911228:A:G:ENSG00000204632 0.035322296 0.648883851  
0.820123249 0.751091602 0.901801828 0.295623551  
rs9256983:29911228:A:G ENSG00000204632  
rs9256983:29911228:A:G:ENSG00000231074 0.48524743 0.039514306  
0.597182664 0.634267399 0.148497947 0.225997306  
rs9256983:29911228:A:G ENSG00000231074  
rs17878860:29911360:A:G:ENSG00000230521 0.035322296 0.248891879  
0.498407593 0.072575018 0.069942274 0.201281701  
rs17878860:29911360:A:G ENSG00000230521  
rs75439900:29911534:A:C:ENSG00000230521 0.035322296 0.202241296  
0.466752146 0.072575018 0.069942274 0.108665807  
rs75439900:29911534:A:C ENSG00000230521  
rs76475517:29911545:G:A:ENSG00000230521 0.035322296 0.248891879  
0.507796015 0.072575018 0.069942274 0.201281701  
rs76475517:29911545:G:A ENSG00000230521  
rs29028728:29911571:G:C:ENSG00000230521 0.035322296 0.202241296  
0.429802874 0.072575018 0.069942274 0.225997306  
rs29028728:29911571:G:C ENSG00000230521  
JHU\_6.29911836:ENSG00000230521 0.035322296 0.248891879 0.511835264  
0.072575018 0.069942274 0.201281701 JHU\_6.29911836 ENSG00000230521  
rs1059570:29911951:C:T:ENSG00000230521 0.035322296 0.039514306  
0.572955873 0.072575018 0.148497947 0.225997306  
rs1059570:29911951:C:T ENSG00000230521  
rs12721755:29911957:G:A:ENSG00000230521 0.035322296 0.281740211  
0.568366244 0.072575018 0.069942274 0.174366738  
rs12721755:29911957:G:A ENSG00000230521  
exm-rs2517723:ENSG00000227262 0.569266218 0.039514306 0.828327833  
0.753959404 0.929731916 0.545172079 exm-rs2517723 ENSG00000227262  
rs2517722:ENSG00000227262 0.570211557 0.039514306 0.828327833  
0.753121345 0.9305498 0.550290331 rs2517722 ENSG00000227262  
JHU\_6.29915350:ENSG00000230521 0.035322296 0.110495165 0.400191924  
0.072575018 0.069942274 0.063994875 JHU\_6.29915350 ENSG00000230521  
rs72845120:29915403:G:A:ENSG00000227262 0.035322296 0.472808011 0.48190184  
0.6156448 0.930300633 0.707675982 rs72845120:29915403:G:A  
ENSG00000227262

rs72845120:29915403:G:A:ENSG00000230521 0.035322296 0.110495165  
0.400191924 0.072575018 0.069942274 0.063994875  
rs72845120:29915403:G:A ENSG00000230521  
JHU\_6.29915437:ENSG00000227262 0.035322296 0.472808011 0.48190184  
0.6156448 0.930300633 0.707675982 JHU\_6.29915437 ENSG00000227262  
JHU\_6.29915437:ENSG00000230521 0.035322296 0.110495165 0.400191924  
0.072575018 0.069942274 0.063994875 JHU\_6.29915437 ENSG00000230521  
rs34095738:29915791:T:C:ENSG00000227262 0.035322296 0.472808011 0.48190184  
0.617124137 0.9305498 0.709269161 rs34095738:29915791:T:C  
ENSG00000227262  
rs34095738:29915791:T:C:ENSG00000230521 0.035322296 0.110495165  
0.400191924 0.072575018 0.069942274 0.063994875  
rs34095738:29915791:T:C ENSG00000230521  
rs34016903:29915839:C:T:ENSG00000230521 0.035322296 0.110495165  
0.400191924 0.072575018 0.069942274 0.063994875  
rs34016903:29915839:C:T ENSG00000230521  
rs112377352:29915945:G:A:ENSG00000230521 0.035322296 0.145249232  
0.406502841 0.072575018 0.069942274 0.063994875  
rs112377352:29915945:G:A ENSG00000230521  
rs72845126:29916287:G:T:ENSG00000230521 0.035322296 0.039514306  
0.184980376 0.072575018 0.069942274 0.063994875  
rs72845126:29916287:G:T ENSG00000230521  
rs72845127:29916460:G:A:ENSG00000227262 0.035322296 0.463260354  
0.495886418 0.617124137 0.930300633 0.66629958  
rs72845127:29916460:G:A ENSG00000227262  
rs72845127:29916460:G:A:ENSG00000230521 0.035322296 0.110495165  
0.400191924 0.072575018 0.069942274 0.063994875  
rs72845127:29916460:G:A ENSG00000230521  
rs9260304:29916481:G:T:ENSG00000227262 0.035322296 0.484305836  
0.525522206 0.603611735 0.9305498 0.780608344  
rs9260304:29916481:G:T ENSG00000227262  
rs9260304:29916481:G:T:ENSG00000230521 0.035322296 0.089622533  
0.269469279 0.072575018 0.069942274 0.063994875  
rs9260304:29916481:G:T ENSG00000230521  
rs72845132:29916639:C:A:ENSG00000227262 0.035322296 0.437172873  
0.470302738 0.617124137 0.90539517 0.740076738  
rs72845132:29916639:C:A ENSG00000227262  
rs72845132:29916639:C:A:ENSG00000230521 0.035322296 0.145249232  
0.406502841 0.072575018 0.069942274 0.063994875  
rs72845132:29916639:C:A ENSG00000230521  
rs72845133:29916654:C:T:ENSG00000204644 0.035322296 0.507089732  
0.568513848 0.672594322 0.340307796 0.063994875  
rs72845133:29916654:C:T ENSG00000204644  
rs72845133:29916654:C:T:ENSG00000227262 0.035322296 0.367821565  
0.495886418 0.617124137 0.9305498 0.780608344  
rs72845133:29916654:C:T ENSG00000227262  
rs72845133:29916654:C:T:ENSG00000230521 0.035322296 0.311964405  
0.390230616 0.072575018 0.069942274 0.347302535  
rs72845133:29916654:C:T ENSG00000230521  
rs1655902:29916855:G:A:ENSG00000204632 0.228236375 0.039514306  
0.618696386 0.442167795 0.932913067 0.532059322  
rs1655902:29916855:G:A ENSG00000204632

rs72845135:29916922:G:T:ENSG00000227262 0.035322296 0.472808011  
0.477036266 0.616427509 0.9305498 0.707675982  
rs72845135:29916922:G:T ENSG00000227262  
rs72845135:29916922:G:T:ENSG00000230521 0.035322296 0.110495165  
0.400191924 0.072575018 0.069942274 0.063994875  
rs72845135:29916922:G:T ENSG00000230521  
JHU\_6.29916970:ENSG00000230521 0.035322296 0.039514306 0.5196698  
0.072575018 0.069942274 0.063994875 JHU\_6.29916970 ENSG00000230521  
JHU\_6.29916970:ENSG00000230795 0.035322296 0.248891879 0.121437838  
0.350892299 0.54593522 0.063994875 JHU\_6.29916970 ENSG00000230795  
rs72845140:29917179:A:C:ENSG00000227262 0.035322296 0.469861597  
0.477036266 0.616786493 0.928428002 0.710464737  
rs72845140:29917179:A:C ENSG00000227262  
rs2517713:ENSG00000204632 0.035322296 0.174910011 0.828327833  
0.408307051 0.288162171 0.401203391 rs2517713 ENSG00000204632  
rs2517710:29918296:C:T:ENSG00000227262 0.539408775 0.039514306  
0.674762224 0.782794422 0.74808171 0.813853703  
rs2517710:29918296:C:T ENSG00000227262  
rs2508037:ENSG00000227262 0.544817099 0.039514306 0.670633075  
0.779190058 0.72290993 0.813853703 rs2508037 ENSG00000227262  
JHU\_6.29918635:ENSG00000230521 0.035322296 0.174910011 0.466752146  
0.072575018 0.069942274 0.140342165 JHU\_6.29918635 ENSG00000230521  
JHU\_6.29918733:ENSG00000227262 0.544012783 0.039514306 0.669205477  
0.778955161 0.71894781 0.813853703 JHU\_6.29918733 ENSG00000227262  
JHU\_6.29918769:ENSG00000227262 0.543396977 0.039514306 0.669205477  
0.778955161 0.72290993 0.813853703 JHU\_6.29918769 ENSG00000227262  
JHU\_6.29918860:ENSG00000227262 0.543396977 0.039514306 0.669205477  
0.778955161 0.72290993 0.813853703 JHU\_6.29918860 ENSG00000227262  
rs9260405:29918887:T:C:ENSG00000227262 0.464133132 0.039514306  
0.593231314 0.678782234 0.844400328 0.813853703  
rs9260405:29918887:T:C ENSG00000227262  
JHU\_6.29918916:ENSG00000227262 0.443446124 0.039514306 0.675900586  
0.736814521 0.555947116 0.538926046 JHU\_6.29918916 ENSG00000227262  
rs9260413:29919010:C:G:ENSG00000227262 0.544012783 0.039514306  
0.670633075 0.778955161 0.72290993 0.813853703  
rs9260413:29919010:C:G ENSG00000227262  
rs9260415:29919021:A:C:ENSG00000227262 0.467143585 0.039514306  
0.604215794 0.685348652 0.845554455 0.813853703  
rs9260415:29919021:A:C ENSG00000227262  
rs9260417:29919023:G:T:ENSG00000227262 0.464133132 0.039514306 0.59314904  
0.677268785 0.845554455 0.813853703 rs9260417:29919023:G:T  
ENSG00000227262  
rs9260424:29919098:A:G:ENSG00000227262 0.539408775 0.039514306  
0.674762224 0.780657815 0.752490742 0.813853703  
rs9260424:29919098:A:G ENSG00000227262  
6:29919132:T:G:ENSG00000227262 0.464133132 0.039514306 0.593231314  
0.678782234 0.845554455 0.813853703 6:29919132:T:G ENSG00000227262  
6:29919141:C:G:ENSG00000227262 0.544817099 0.039514306 0.670633075  
0.779190058 0.72290993 0.813853703 6:29919141:C:G ENSG00000227262  
6:29919352:CTTTA:CTTTATTTA:ENSG00000227262 0.035322296 0.334648487  
0.828327833 0.763588687 0.410008196 0.751207108  
6:29919352:CTTTA:CTTTATTTA ENSG00000227262

rs2517709:29919421:A:G:ENSG00000227262 0.574499569 0.039514306 0.65652076  
0.775572817 0.66458282 0.813853703 rs2517709:29919421:A:G  
ENSG00000227262

rs2517707:29919516:A:C:ENSG00000227262 0.464133132 0.039514306  
0.593231314 0.678782234 0.846349625 0.813853703  
rs2517707:29919516:A:C ENSG00000227262

rs72845150:29919819:C:G:ENSG00000230521 0.035322296 0.240653097  
0.498407593 0.072575018 0.069942274 0.140342165  
rs72845150:29919819:C:G ENSG00000230521

JHU\_6.29919863:ENSG00000227262 0.506964097 0.039514306 0.707238467  
0.751091602 0.621203936 0.813853703 JHU\_6.29919863 ENSG00000227262

rs73725580:29919934:T:C:ENSG00000230521 0.035322296 0.529389495  
0.351078567 0.244282474 0.069942274 0.510329036  
rs73725580:29919934:T:C ENSG00000230521

rs1655910:29920105:C:A:ENSG00000227262 0.557545872 0.039514306  
0.767163632 0.780657815 0.850760242 0.813853703  
rs1655910:29920105:C:A ENSG00000227262

rs9260484:29920253:A:C:ENSG00000227262 0.557545872 0.039514306  
0.767163632 0.781060792 0.851849581 0.813853703  
rs9260484:29920253:A:C ENSG00000227262

rs78720542:29920320:T:C:ENSG00000230521 0.035322296 0.396207958  
0.568513848 0.072575018 0.069942274 0.347302535  
rs78720542:29920320:T:C ENSG00000230521

rs9260532:29921235:C:T:ENSG00000227262 0.035322296 0.066642396  
0.283332252 0.276782326 0.467095788 0.559822551  
rs9260532:29921235:C:T ENSG00000227262

rs9260614:29922995:T:C:ENSG00000227262 0.53589358 0.039514306  
0.679533134 0.751091602 0.655885306 0.804202828  
rs9260614:29922995:T:C ENSG00000227262

rs115644852:29923184:C:T:ENSG00000230521 0.035322296 0.349699032  
0.568513848 0.072575018 0.069942274 0.319318857  
rs115644852:29923184:C:T ENSG00000230521

rs9260626:29923189:G:A:ENSG00000230521 0.035322296 0.367821565  
0.550245587 0.072575018 0.069942274 0.174366738  
rs9260626:29923189:G:A ENSG00000230521

rs2844810:29923580:G:C:ENSG00000227262 0.547691077 0.039514306 0.72386196  
0.777241096 0.789409778 0.817686609 rs2844810:29923580:G:C  
ENSG00000227262

JHU\_6.29924888:ENSG00000204622 0.271758927 0.039514306 0.65652076  
0.528521718 0.410008196 0.532059322 JHU\_6.29924888 ENSG00000204622

rs17180058:29934152:C:G:ENSG00000230521 0.035322296 0.202241296 0.33856507  
0.496527133 0.069942274 0.782163764 rs17180058:29934152:C:G  
ENSG00000230521

rs2256539:ENSG00000204644 0.23344096 0.039514306 0.61437749  
0.263905944 0.069942274 0.739809647 rs2256539 ENSG00000204644

rs17180311:29940002:G:A:ENSG00000230521 0.035322296 0.248891879 0.42786084  
0.614732278 0.069942274 0.813853703 rs17180311:29940002:G:A  
ENSG00000230521

JHU\_6.29943055:ENSG00000230521 0.035322296 0.257351931 0.429802874  
0.614732278 0.069942274 0.813853703 JHU\_6.29943055 ENSG00000230521

rs2735076:ENSG00000230521 0.035322296 0.500746138 0.828327833  
0.579004696 0.859361356 0.638312381 rs2735076 ENSG00000230521



rs150614636:29944715:G:C:ENSG00000230521 0.035322296 0.257351931  
0.42786084 0.614732278 0.069942274 0.813853703  
rs150614636:29944715:G:C ENSG00000230521  
exm-rs9260988:ENSG00000066379 0.333587289 0.039514306 0.7518355  
0.626314657 0.069942274 0.063994875 exm-rs9260988 ENSG00000066379  
JHU\_6.29962583:ENSG00000066379 0.33585794 0.039514306 0.760866298  
0.628695369 0.069942274 0.063994875 JHU\_6.29962583 ENSG00000066379  
rs9260991:29962591:G:C:ENSG00000066379 0.311750411 0.039514306  
0.766562582 0.627744359 0.069942274 0.063994875  
rs9260991:29962591:G:C ENSG00000066379  
rs9260992:29962592:G:A:ENSG00000066379 0.310004009 0.039514306  
0.767163632 0.628695369 0.069942274 0.063994875  
rs9260992:29962592:G:A ENSG00000066379  
rs9260994:29962796:C:G:ENSG00000066379 0.33585794 0.039514306  
0.757967988 0.634198516 0.069942274 0.063994875  
rs9260994:29962796:C:G ENSG00000066379  
JHU\_6.29962889:ENSG00000066379 0.271758927 0.039514306 0.693319897  
0.590665154 0.069942274 0.063994875 JHU\_6.29962889 ENSG00000066379  
rs6910507:29962926:T:G:ENSG00000066379 0.271758927 0.039514306  
0.693319897 0.579004696 0.069942274 0.063994875  
rs6910507:29962926:T:G ENSG00000066379  
rs9260999:29963815:C:T:ENSG00000066379 0.35484344 0.039514306  
0.771670385 0.642470662 0.069942274 0.063994875  
rs9260999:29963815:C:T ENSG00000066379  
rs9261000:29963829:G:A:ENSG00000066379 0.332523749 0.039514306  
0.766562582 0.649756756 0.069942274 0.063994875  
rs9261000:29963829:G:A ENSG00000066379  
rs9280836:29964070:C:CT:ENSG00000066379 0.332523749 0.039514306  
0.767962809 0.649756756 0.069942274 0.063994875  
rs9280836:29964070:C:CT ENSG00000066379  
rs9261001:29964102:G:A:ENSG00000066379 0.334162828 0.039514306  
0.765578222 0.637390127 0.069942274 0.063994875  
rs9261001:29964102:G:A ENSG00000066379  
rs9261002:29964150:T:G:ENSG00000066379 0.332523749 0.039514306  
0.766562582 0.649756756 0.069942274 0.063994875  
rs9261002:29964150:T:G ENSG00000066379  
rs9261003:29964152:G:C:ENSG00000066379 0.332523749 0.039514306  
0.766562582 0.649756756 0.069942274 0.063994875  
rs9261003:29964152:G:C ENSG00000066379  
rs9261004:29964253:C:T:ENSG00000066379 0.332523749 0.039514306  
0.766562582 0.649756756 0.069942274 0.063994875  
rs9261004:29964253:C:T ENSG00000066379  
JHU\_6.29964466:ENSG00000066379 0.332523749 0.039514306 0.766562582  
0.649756756 0.069942274 0.063994875 JHU\_6.29964466 ENSG00000066379  
rs9261009:29964676:C:T:ENSG00000066379 0.332523749 0.039514306  
0.767962809 0.649756756 0.069942274 0.063994875  
rs9261009:29964676:C:T ENSG00000066379  
rs9261209:30008319:A:G:ENSG00000066379 0.359567157 0.039514306  
0.833978613 0.663806993 0.148497947 0.457928806  
rs9261209:30008319:A:G ENSG00000066379  
rs9261210:30008331:C:G:ENSG00000066379 0.359567157 0.039514306  
0.833978613 0.663806993 0.148497947 0.457928806  
rs9261210:30008331:C:G ENSG00000066379

rs184648988:30051556:G:C:ENSG00000066379 0.035322296 0.661628136  
0.828327833 0.772750049 0.9305498 0.590052663  
rs184648988:30051556:G:C ENSG00000066379  
rs72502600:31974589:G:C:ENSG00000198502 0.570987616 0.039514306  
0.640107889 0.507376693 0.875635183 0.764353403  
rs72502600:31974589:G:C ENSG00000198502  
JHU\_6.32454268:ENSG00000198502 0.035322296 0.651399716 0.685268659  
0.751091602 0.9305498 0.813853703 JHU\_6.32454268 ENSG00000198502  
JHU\_6.32492031:ENSG00000198502 0.035322296 0.651399716 0.797260875  
0.780657815 0.9305498 0.824357868 JHU\_6.32492031 ENSG00000198502  
rs17843604:32620283:C:T:ENSG00000179344 0.035322296 0.69497631  
0.587216849 0.52264501 0.9305498 0.556049114  
rs17843604:32620283:C:T ENSG00000179344  
rs12528712:109660884:C:A:ENSG00000260273 0.440655985 0.039514306  
0.454299825 0.314254491 0.716444316 0.7765296  
rs12528712:109660884:C:A ENSG00000260273  
rs2275650:109668288:C:T:ENSG00000260273 0.344174629 0.039514306  
0.222302049 0.226823504 0.685405973 0.58035006  
rs2275650:109668288:C:T ENSG00000260273  
rs3818934:109668480:C:T:ENSG00000260273 0.343380618 0.039514306  
0.222302049 0.226823504 0.685405973 0.58035006  
rs3818934:109668480:C:T ENSG00000260273  
rs13203252:109672736:A:G:ENSG00000260273 0.465628086 0.039514306  
0.458471274 0.314254491 0.769250833 0.7765296  
rs13203252:109672736:A:G ENSG00000260273  
rs11153174:109674055:C:T:ENSG00000260273 0.339455396 0.039514306  
0.222302049 0.226823504 0.685405973 0.58035006  
rs11153174:109674055:C:T ENSG00000260273  
rs67857472:109680328:C:T:ENSG00000260273 0.440655985 0.039514306  
0.485354668 0.301206855 0.750632228 0.780608344  
rs67857472:109680328:C:T ENSG00000260273  
rs11757877:109681882:T:C:ENSG00000260273 0.463185499 0.039514306  
0.531748779 0.387628207 0.784162464 0.807989632  
rs11757877:109681882:T:C ENSG00000260273  
rs61233650:109686612:C:T:ENSG00000260273 0.419607171 0.039514306  
0.443593462 0.276782326 0.731951824 0.773208495  
rs61233650:109686612:C:T ENSG00000260273  
rs3799835:109693287:A:G:ENSG00000260273 0.418609874 0.039514306  
0.443593462 0.276782326 0.730942663 0.772415663  
rs3799835:109693287:A:G ENSG00000260273  
rs34131679:109697051:C:A:ENSG00000260273 0.454899664 0.039514306  
0.503583077 0.340834261 0.774765425 0.790913456  
rs34131679:109697051:C:A ENSG00000260273  
rs3799840:109702646:A:T:ENSG00000260273 0.515193516 0.039514306  
0.454299825 0.333474506 0.762549256 0.813853703  
rs3799840:109702646:A:T ENSG00000260273  
rs2275652:109703683:G:C:ENSG00000260273 0.515193516 0.039514306  
0.454299825 0.333474506 0.762549256 0.813853703  
rs2275652:109703683:G:C ENSG00000260273  
rs200998194:109708301:A:AT:ENSG00000260273 0.515908395 0.039514306  
0.48190184 0.387628207 0.801413132 0.813853703  
rs200998194:109708301:A:AT ENSG00000260273

rs13199519:109709175:G:A:ENSG00000260273 0.515908395 0.039514306  
0.48190184 0.387628207 0.801413132 0.813853703  
rs13199519:109709175:G:A ENSG00000260273  
rs6929208:109720405:G:C:ENSG00000260273 0.515908395 0.039514306  
0.495886418 0.390584104 0.795865519 0.813853703  
rs6929208:109720405:G:C ENSG00000260273  
rs6916579:109851638:A:G:ENSG00000260273 0.349088436 0.039514306 0.42786084  
0.072575018 0.603364769 0.813853703 rs6916579:109851638:A:G  
ENSG00000260273  
rs144710457:109858605:A:G:ENSG00000260273 0.511652315 0.039514306  
0.492105461 0.197042097 0.675380087 0.813853703  
rs144710457:109858605:A:G ENSG00000260273  
rs13214717:ENSG00000260273 0.500930531 0.039514306 0.429802874  
0.072575018 0.629639249 0.813853703 rs13214717 ENSG00000260273  
rs2208209:109903003:C:T:ENSG00000260273 0.437249414 0.039514306  
0.528262409 0.123210094 0.685405973 0.813853703  
rs2208209:109903003:C:T ENSG00000260273  
rs12208933:109903786:C:T:ENSG00000260273 0.439359535 0.039514306  
0.528262409 0.123210094 0.685405973 0.813853703  
rs12208933:109903786:C:T ENSG00000260273  
rs71770197:109906329:GCTT:G:ENSG00000260273 0.4990958 0.039514306  
0.568513848 0.165229468 0.9305498 0.826638859  
rs71770197:109906329:GCTT:G ENSG00000260273  
rs2148089:109913811:G:A:ENSG00000260273 0.446625656 0.039514306  
0.568513848 0.165229468 0.690981753 0.813853703  
rs2148089:109913811:G:A ENSG00000260273  
rs199556160:109920169:G:C:ENSG00000260273 0.433234922 0.039514306  
0.545428271 0.226823504 0.690981753 0.813853703  
rs199556160:109920169:G:C ENSG00000260273  
rs370195653:109920492:G:A:ENSG00000260273 0.444708302 0.039514306  
0.550245587 0.197042097 0.690981753 0.813853703  
rs370195653:109920492:G:A ENSG00000260273  
rs6914498:109934408:G:A:ENSG00000260273 0.434375451 0.039514306  
0.542268712 0.226823504 0.690981753 0.813853703  
rs6914498:109934408:G:A ENSG00000260273  
rs13204102:109938944:C:A:ENSG00000260273 0.445714593 0.039514306  
0.552896362 0.197042097 0.690981753 0.813853703  
rs13204102:109938944:C:A ENSG00000260273  
rs78056477:109939052:GAC:G:ENSG00000260273 0.433234922 0.039514306  
0.545428271 0.226823504 0.690981753 0.813853703  
rs78056477:109939052:GAC:G ENSG00000260273  
rs10499053:109940498:A:G:ENSG00000260273 0.449694788 0.039514306  
0.548514013 0.165229468 0.690981753 0.813853703  
rs10499053:109940498:A:G ENSG00000260273  
rs12527577:109942567:C:T:ENSG00000260273 0.517092266 0.039514306  
0.562861286 0.276782326 0.731951824 0.813853703  
rs12527577:109942567:C:T ENSG00000260273  
rs13204500:109961885:G:A:ENSG00000260273 0.452814686 0.039514306  
0.562861286 0.123210094 0.690981753 0.813853703  
rs13204500:109961885:G:A ENSG00000260273  
rs1321328:109976385:G:C:ENSG00000260273 0.439359535 0.039514306  
0.545428271 0.226823504 0.690981753 0.813853703  
rs1321328:109976385:G:C ENSG00000260273

rs971434:ENSG00000260273 0.340915103 0.039514306 0.324917292  
0.072575018 0.477032507 0.75395128 rs971434 ENSG00000260273  
rs34393084:109992940:TG:T:ENSG00000260273 0.563836278 0.039514306  
0.42786084 0.165229468 0.9305498 0.69542589  
rs34393084:109992940:TG:T ENSG00000260273  
rs6911700:109997294:T:C:ENSG00000260273 0.554031888 0.039514306  
0.238368074 0.072575018 0.9305498 0.586168441  
rs6911700:109997294:T:C ENSG00000260273  
rs6568592:110000639:A:G:ENSG00000260273 0.575759567 0.039514306  
0.498407593 0.072575018 0.9305498 0.747308154  
rs6568592:110000639:A:G ENSG00000260273  
rs7341297:110000682:A:G:ENSG00000260273 0.563313228 0.039514306  
0.165546404 0.072575018 0.889560736 0.56328436  
rs7341297:110000682:A:G ENSG00000260273  
rs10457203:110004300:T:C:ENSG00000260273 0.575759567 0.039514306  
0.498407593 0.072575018 0.9305498 0.747308154  
rs10457203:110004300:T:C ENSG00000260273  
rs12210706:110005474:G:A:ENSG00000260273 0.563313228 0.039514306  
0.165546404 0.072575018 0.889560736 0.56328436  
rs12210706:110005474:G:A ENSG00000260273  
rs11153213:110015093:A:G:ENSG00000260273 0.586221279 0.039514306  
0.165546404 0.072575018 0.89883587 0.6481702  
rs11153213:110015093:A:G ENSG00000260273  
rs11153214:110015323:A:G:ENSG00000260273 0.371007394 0.039514306  
0.411358711 0.072575018 0.574209974 0.813853703  
rs11153214:110015323:A:G ENSG00000260273  
rs12201356:110015875:T:C:ENSG00000260273 0.585881681 0.039514306  
0.165546404 0.072575018 0.899275605 0.652863919  
rs12201356:110015875:T:C ENSG00000260273  
rs35295916:110024302:A:AT:ENSG00000260273 0.377859504 0.039514306  
0.411358711 0.072575018 0.57001038 0.813853703  
rs35295916:110024302:A:AT ENSG00000260273  
rs3799845:110027717:G:A:ENSG00000260273 0.584874096 0.039514306  
0.165546404 0.072575018 0.905434766 0.672369682  
rs3799845:110027717:G:A ENSG00000260273  
rs13207864:110029730:C:T:ENSG00000260273 0.471400406 0.039514306  
0.054815691 0.072575018 0.381322091 0.813853703  
rs13207864:110029730:C:T ENSG00000260273  
rs13211604:110033728:G:C:ENSG00000260273 0.554566691 0.039514306  
0.450702715 0.276782326 0.740358056 0.813853703  
rs13211604:110033728:G:C ENSG00000260273  
rs13212535:110034391:G:A:ENSG00000260273 0.485584445 0.039514306  
0.054815691 0.072575018 0.445056985 0.813853703  
rs13212535:110034391:G:A ENSG00000260273  
rs12204548:110036707:C:T:ENSG00000260273 0.58925339 0.039514306  
0.398350929 0.072575018 0.9305498 0.813853703  
rs12204548:110036707:C:T ENSG00000260273  
rs12661287:110053250:T:A:ENSG00000260273 0.525787476 0.039514306  
0.090437058 0.072575018 0.559581427 0.813853703  
rs12661287:110053250:T:A ENSG00000260273  
rs11964533:110059000:G:A:ENSG00000260273 0.526360714 0.039514306  
0.090437058 0.072575018 0.559581427 0.813853703  
rs11964533:110059000:G:A ENSG00000260273

rs12201444:110059954:G:A:ENSG00000260273 0.586517528 0.039514306  
0.398350929 0.072575018 0.9305498 0.813853703  
rs12201444:110059954:G:A ENSG00000260273  
rs13194387:110066935:G:A:ENSG00000260273 0.554891782 0.039514306  
0.310525978 0.197042097 0.381322091 0.775020218  
rs13194387:110066935:G:A ENSG00000260273  
rs13198852:110068322:C:T:ENSG00000260273 0.568500354 0.039514306  
0.165546404 0.072575018 0.767723787 0.720957673  
rs13198852:110068322:C:T ENSG00000260273  
rs11153216:110070022:G:A:ENSG00000260273 0.566834875 0.039514306  
0.054815691 0.072575018 0.697271859 0.629184088  
rs11153216:110070022:G:A ENSG00000260273  
rs13197056:110072732:G:A:ENSG00000260273 0.519192598 0.039514306  
0.054815691 0.072575018 0.069942274 0.60918994  
rs13197056:110072732:G:A ENSG00000260273  
rs149829047:110079111:A:G:ENSG00000260273 0.566834875 0.039514306  
0.054815691 0.072575018 0.697271859 0.629719559  
rs149829047:110079111:A:G ENSG00000260273  
rs13191444:110084064:A:G:ENSG00000260273 0.570070192 0.039514306  
0.351078567 0.314254491 0.472198515 0.795155854  
rs13191444:110084064:A:G ENSG00000260273  
rs12190372:110084534:G:A:ENSG00000260273 0.566834875 0.039514306  
0.054815691 0.072575018 0.699395727 0.629719559  
rs12190372:110084534:G:A ENSG00000260273  
rs13196280:110085366:G:T:ENSG00000260273 0.570070192 0.039514306  
0.351078567 0.314254491 0.472198515 0.795155854  
rs13196280:110085366:G:T ENSG00000260273  
rs140560218:110086098:TTTTTTG:TTTTTTGTTTTTGTTTTTG:ENSG00000260273  
0.554031888 0.039514306 0.283332252 0.314254491 0.874881554  
0.753387287 rs140560218:110086098:TTTTTTG:TTTTTTGTTTTTGTTTTTG  
ENSG00000260273  
rs11968978:ENSG00000260273 0.56420809 0.039514306 0.121437838  
0.385352708 0.690981753 0.795155854 rs11968978 ENSG00000260273  
rs1462490:110396676:A:C:ENSG00000168438 0.035322296 0.039514306  
0.054815691 0.072575018 0.148497947 0.063994875  
rs1462490:110396676:A:C ENSG00000168438  
rs57049072:110401834:C:CCTGGCTGGCCCTAG:ENSG00000168438 0.035322296  
0.039514306 0.054815691 0.197042097 0.251839208 0.063994875  
rs57049072:110401834:C:CCTGGCTGGCCCTAG ENSG00000168438  
rs6925392:ENSG00000168438 0.480140265 0.039514306 0.238368074  
0.595546163 0.650850274 0.063994875 rs6925392 ENSG00000168438  
rs6915379:110429020:T:A:ENSG00000168438 0.219347314 0.039514306  
0.054815691 0.290136921 0.371793022 0.295623551  
rs6915379:110429020:T:A ENSG00000168438  
rs6927722:110430611:C:T:ENSG00000168438 0.332523749 0.039514306  
0.054815691 0.442167795 0.480692872 0.477177495  
rs6927722:110430611:C:T ENSG00000168438  
rs6928684:110430958:G:T:ENSG00000168438 0.332523749 0.039514306  
0.054815691 0.442167795 0.480692872 0.477177495  
rs6928684:110430958:G:T ENSG00000168438  
rs73535810:110436868:G:A:ENSG00000168438 0.332523749 0.039514306  
0.054815691 0.442167795 0.480692872 0.477177495  
rs73535810:110436868:G:A ENSG00000168438

rs4945850:ENSG00000168438 0.035322296 0.039514306 0.054815691  
0.072575018 0.069942274 0.063994875 rs4945850 ENSG00000168438  
rs12660791:110456662:C:T:ENSG00000168438 0.304041304 0.039514306  
0.054815691 0.419678998 0.410008196 0.605346151  
rs12660791:110456662:C:T ENSG00000168438  
rs6927667:110467947:C:A:ENSG00000168438 0.332523749 0.039514306  
0.054815691 0.442167795 0.480692872 0.477177495  
rs6927667:110467947:C:A ENSG00000168438  
rs6927697:110468046:A:G:ENSG00000168438 0.219347314 0.039514306  
0.054815691 0.290136921 0.371793022 0.295623551  
rs6927697:110468046:A:G ENSG00000168438  
rs1462492:110470458:G:A:ENSG00000168438 0.332523749 0.039514306  
0.054815691 0.442167795 0.480692872 0.477177495  
rs1462492:110470458:G:A ENSG00000168438  
rs1462493:110470514:G:C:ENSG00000168438 0.219347314 0.039514306  
0.054815691 0.290136921 0.371793022 0.295623551  
rs1462493:110470514:G:C ENSG00000168438  
rs4947048:110471195:G:C:ENSG00000168438 0.332523749 0.039514306  
0.054815691 0.442167795 0.480692872 0.477177495  
rs4947048:110471195:G:C ENSG00000168438  
rs6568633:110492564:T:C:ENSG00000168438 0.035322296 0.039514306  
0.054815691 0.072575018 0.069942274 0.063994875  
rs6568633:110492564:T:C ENSG00000168438  
rs6926540:110494209:T:C:ENSG00000168438 0.334162828 0.039514306  
0.054815691 0.455203609 0.493250562 0.501122218  
rs6926540:110494209:T:C ENSG00000168438  
rs4945851:110497233:T:C:ENSG00000168438 0.228236375 0.039514306  
0.054815691 0.301206855 0.388754065 0.295623551  
rs4945851:110497233:T:C ENSG00000168438  
rs4257894:110498209:C:A:ENSG00000168438 0.035322296 0.039514306  
0.054815691 0.072575018 0.069942274 0.063994875  
rs4257894:110498209:C:A ENSG00000168438  
rs73537927:110500355:C:G:ENSG00000168438 0.228236375 0.039514306  
0.054815691 0.301206855 0.388754065 0.295623551  
rs73537927:110500355:C:G ENSG00000168438  
rs73537938:110517993:G:A:ENSG00000168438 0.243759522 0.039514306  
0.054815691 0.290136921 0.410008196 0.295623551  
rs73537938:110517993:G:A ENSG00000168438  
rs4509164:110520157:A:G:ENSG00000168438 0.196140407 0.039514306  
0.054815691 0.244282474 0.340307796 0.201281701  
rs4509164:110520157:A:G ENSG00000168438  
rs6938139:110539958:A:G:ENSG00000168438 0.297292124 0.039514306  
0.054815691 0.454179145 0.614364441 0.063994875  
rs6938139:110539958:A:G ENSG00000168438  
rs149309025:119154346:C:T:ENSG00000111877 0.475980132 0.039514306  
0.054815691 0.385352708 0.667917828 0.681432383  
rs149309025:119154346:C:T ENSG00000111877  
rs4946367:119217940:G:A:ENSG00000111877 0.416498515 0.039514306  
0.054815691 0.385352708 0.690981753 0.613318589  
rs4946367:119217940:G:A ENSG00000111877  
rs9401099:119250991:A:G:ENSG00000111877 0.228236375 0.039514306  
0.054815691 0.276782326 0.112902598 0.4815871  
rs9401099:119250991:A:G ENSG00000111877



rs5879474:119251268:A:ATTTTAT:ENSG00000111877 0.311750411 0.039514306  
0.054815691 0.472415297 0.493250562 0.638312381  
rs5879474:119251268:A:ATTTTAT ENSG00000111877  
rs1022709:119251706:C:T:ENSG00000111877 0.215796307 0.039514306  
0.054815691 0.276782326 0.112902598 0.494607223  
rs1022709:119251706:C:T ENSG00000111877  
rs1022708:119251906:C:T:ENSG00000111877 0.306174368 0.039514306  
0.054815691 0.476011459 0.493250562 0.638312381  
rs1022708:119251906:C:T ENSG00000111877  
rs1022707:119251971:G:T:ENSG00000111877 0.215796307 0.039514306  
0.054815691 0.290136921 0.112902598 0.494607223  
rs1022707:119251971:G:T ENSG00000111877  
rs1022706:119252006:A:T:ENSG00000111877 0.306174368 0.039514306  
0.054815691 0.478009532 0.493250562 0.638312381  
rs1022706:119252006:A:T ENSG00000111877  
rs6918844:119252028:G:A:ENSG00000111877 0.215796307 0.039514306  
0.054815691 0.290136921 0.112902598 0.494607223  
rs6918844:119252028:G:A ENSG00000111877  
rs6918569:119252111:A:G:ENSG00000111877 0.310004009 0.039514306  
0.054815691 0.491850645 0.472198515 0.681432383  
rs6918569:119252111:A:G ENSG00000111877  
rs6919100:119252400:A:T:ENSG00000111877 0.215796307 0.039514306  
0.054815691 0.290136921 0.112902598 0.494607223  
rs6919100:119252400:A:T ENSG00000111877  
rs9689589:119253251:T:A:ENSG00000111877 0.35010809 0.039514306  
0.121437838 0.491850645 0.54593522 0.726813924  
rs9689589:119253251:T:A ENSG00000111877  
rs11965951:119253270:C:T:ENSG00000111877 0.271758927 0.039514306  
0.054815691 0.406267798 0.363699827 0.562535698  
rs11965951:119253270:C:T ENSG00000111877  
rs9320669:119253358:G:A:ENSG00000111877 0.333587289 0.039514306  
0.090437058 0.486971863 0.525520858 0.672369682  
rs9320669:119253358:G:A ENSG00000111877  
rs9320670:119253417:G:A:ENSG00000111877 0.328661655 0.039514306  
0.054815691 0.484670506 0.498016841 0.663342074  
rs9320670:119253417:G:A ENSG00000111877  
rs9320671:119253682:G:A:ENSG00000111877 0.18193752 0.039514306  
0.054815691 0.276782326 0.198669295 0.487204938  
rs9320671:119253682:G:A ENSG00000111877  
rs6910782:119254156:T:C:ENSG00000111877 0.253880551 0.039514306  
0.054815691 0.326422852 0.266901314 0.52739468  
rs6910782:119254156:T:C ENSG00000111877  
rs4946369:119254250:A:T:ENSG00000111877 0.18193752 0.039514306  
0.054815691 0.276782326 0.198669295 0.487204938  
rs4946369:119254250:A:T ENSG00000111877  
rs11967231:119254888:C:T:ENSG00000111877 0.311750411 0.039514306  
0.054815691 0.476011459 0.498016841 0.66967784  
rs11967231:119254888:C:T ENSG00000111877  
rs11967232:119254897:C:T:ENSG00000111877 0.175415731 0.039514306  
0.054815691 0.276782326 0.198669295 0.501122218  
rs11967232:119254897:C:T ENSG00000111877  
rs9374759:119254929:T:C:ENSG00000111877 0.311750411 0.039514306  
0.054815691 0.472415297 0.498016841 0.66967784  
rs9374759:119254929:T:C ENSG00000111877

rs9387610:119255003:A:G:ENSG00000111877 0.18193752 0.039514306  
0.054815691 0.276782326 0.198669295 0.487204938  
rs9387610:119255003:A:G ENSG00000111877  
rs1885125:ENSG00000111877 0.320653282 0.039514306 0.054815691  
0.484670506 0.498016841 0.664807456 rs1885125 ENSG00000111877  
rs62422266:119256165:A:G:ENSG00000111877 0.18193752 0.039514306  
0.054815691 0.276782326 0.198669295 0.487204938  
rs62422266:119256165:A:G ENSG00000111877  
rs62422267:119256173:C:G:ENSG00000111877 0.305615864 0.039514306  
0.054815691 0.478009532 0.493250562 0.640308963  
rs62422267:119256173:C:G ENSG00000111877  
rs62422268:119256232:G:C:ENSG00000111877 0.215796307 0.039514306  
0.054815691 0.301206855 0.112902598 0.494607223  
rs62422268:119256232:G:C ENSG00000111877  
rs62422269:119256348:T:C:ENSG00000111877 0.305615864 0.039514306  
0.054815691 0.478009532 0.493250562 0.640308963  
rs62422269:119256348:T:C ENSG00000111877  
rs62422270:119256391:G:A:ENSG00000111877 0.215796307 0.039514306  
0.054815691 0.301206855 0.112902598 0.494607223  
rs62422270:119256391:G:A ENSG00000111877  
rs4946370:119256451:T:A:ENSG00000111877 0.271758927 0.039514306  
0.054815691 0.406267798 0.363699827 0.562535698  
rs4946370:119256451:T:A ENSG00000111877  
rs71746056:119256707:CTA:C:ENSG00000111877 0.332523749 0.039514306  
0.090437058 0.486971863 0.525520858 0.674365303  
rs71746056:119256707:CTA:C ENSG00000111877  
rs4946372:119256739:A:C:ENSG00000111877 0.304041304 0.039514306  
0.054815691 0.478009532 0.493250562 0.640308963  
rs4946372:119256739:A:C ENSG00000111877  
rs4946373:119256835:G:A:ENSG00000111877 0.215796307 0.039514306  
0.054815691 0.301206855 0.112902598 0.494607223  
rs4946373:119256835:G:A ENSG00000111877  
rs4946374:119256881:A:C:ENSG00000111877 0.305615864 0.039514306  
0.054815691 0.478009532 0.493250562 0.643131518  
rs4946374:119256881:A:C ENSG00000111877  
rs2145569:119256979:C:T:ENSG00000111877 0.215796307 0.039514306  
0.054815691 0.314254491 0.112902598 0.494607223  
rs2145569:119256979:C:T ENSG00000111877  
rs2145570:119256999:G:A:ENSG00000111877 0.305615864 0.039514306  
0.054815691 0.478009532 0.493250562 0.640308963  
rs2145570:119256999:G:A ENSG00000111877  
rs3945959:119257050:C:G:ENSG00000111877 0.215796307 0.039514306  
0.054815691 0.301206855 0.112902598 0.494607223  
rs3945959:119257050:C:G ENSG00000111877  
rs6939937:119257128:T:C:ENSG00000111877 0.271758927 0.039514306  
0.054815691 0.406267798 0.363699827 0.562535698  
rs6939937:119257128:T:C ENSG00000111877  
rs2180860:119257137:C:G:ENSG00000111877 0.332523749 0.039514306  
0.090437058 0.486971863 0.525520858 0.674365303  
rs2180860:119257137:C:G ENSG00000111877  
rs57580326:119257444:T:TGAA:ENSG00000111877 0.305615864 0.039514306  
0.054815691 0.478009532 0.493250562 0.640308963  
rs57580326:119257444:T:TGAA ENSG00000111877

rs11378722:119257882:A:AC:ENSG00000111877 0.215796307 0.039514306  
0.054815691 0.301206855 0.112902598 0.494607223  
rs11378722:119257882:A:AC ENSG00000111877  
rs7759423:119257976:G:T:ENSG00000111877 0.312801549 0.039514306  
0.054815691 0.466610843 0.455878819 0.652863919  
rs7759423:119257976:G:T ENSG00000111877  
rs7741149:119258048:T:C:ENSG00000111877 0.271758927 0.039514306  
0.054815691 0.390584104 0.311775972 0.569708815  
rs7741149:119258048:T:C ENSG00000111877  
rs6923771:119258546:C:T:ENSG00000111877 0.305615864 0.039514306  
0.054815691 0.478009532 0.493250562 0.643131518  
rs6923771:119258546:C:T ENSG00000111877  
rs6928315:119258682:C:T:ENSG00000111877 0.215796307 0.039514306  
0.054815691 0.301206855 0.112902598 0.494607223  
rs6928315:119258682:C:T ENSG00000111877  
rs6928945:119259071:A:G:ENSG00000111877 0.271758927 0.039514306  
0.054815691 0.406267798 0.363699827 0.562535698  
rs6928945:119259071:A:G ENSG00000111877  
rs9387611:119259278:G:A:ENSG00000111877 0.332523749 0.039514306  
0.090437058 0.486971863 0.525520858 0.674365303  
rs9387611:119259278:G:A ENSG00000111877  
rs9387612:119259323:G:A:ENSG00000111877 0.305615864 0.039514306  
0.054815691 0.478009532 0.493250562 0.640308963  
rs9387612:119259323:G:A ENSG00000111877  
rs4946376:119259474:C:T:ENSG00000111877 0.215796307 0.039514306  
0.054815691 0.301206855 0.112902598 0.494607223  
rs4946376:119259474:C:T ENSG00000111877  
rs79069475:119259661:T:TG:ENSG00000111877 0.271758927 0.039514306  
0.054815691 0.406267798 0.363699827 0.562535698  
rs79069475:119259661:T:TG ENSG00000111877  
rs4946377:119259818:C:T:ENSG00000111877 0.332523749 0.039514306  
0.090437058 0.486971863 0.525520858 0.674365303  
rs4946377:119259818:C:T ENSG00000111877  
rs4946378:119260030:C:T:ENSG00000111877 0.312801549 0.039514306  
0.054815691 0.466610843 0.455878819 0.652863919  
rs4946378:119260030:C:T ENSG00000111877  
rs4245502:119260151:C:T:ENSG00000111877 0.271758927 0.039514306  
0.054815691 0.390584104 0.311775972 0.569708815  
rs4245502:119260151:C:T ENSG00000111877  
rs6935960:119260280:G:A:ENSG00000111877 0.305615864 0.039514306  
0.054815691 0.478009532 0.493250562 0.640308963  
rs6935960:119260280:G:A ENSG00000111877  
rs11153782:119260855:C:T:ENSG00000111877 0.215796307 0.039514306  
0.054815691 0.301206855 0.112902598 0.494607223  
rs11153782:119260855:C:T ENSG00000111877  
rs6903579:119261734:A:G:ENSG00000111877 0.305615864 0.039514306  
0.054815691 0.478009532 0.493250562 0.640308963  
rs6903579:119261734:A:G ENSG00000111877  
rs6904381:119261916:G:A:ENSG00000111877 0.215796307 0.039514306  
0.054815691 0.301206855 0.112902598 0.494607223  
rs6904381:119261916:G:A ENSG00000111877  
rs7381546:119262082:G:A:ENSG00000111877 0.300053761 0.039514306  
0.054815691 0.481611326 0.484480155 0.629719559  
rs7381546:119262082:G:A ENSG00000111877

rs7381533:119262175:C:T:ENSG00000111877 0.291376195 0.039514306  
0.054815691 0.454179145 0.363699827 0.606678086  
rs7381533:119262175:C:T ENSG00000111877  
rs7381535:119262275:A:G:ENSG00000111877 0.33585794 0.039514306  
0.090437058 0.491850645 0.544223189 0.675892989  
rs7381535:119262275:A:G ENSG00000111877  
rs1807979:119262776:C:T:ENSG00000111877 0.200359533 0.039514306  
0.054815691 0.276782326 0.173591669 0.487204938  
rs1807979:119262776:C:T ENSG00000111877  
rs6910377:119263141:A:G:ENSG00000111877 0.311750411 0.039514306  
0.054815691 0.466610843 0.472198515 0.619162849  
rs6910377:119263141:A:G ENSG00000111877  
rs34172642:119263336:A:AG:ENSG00000111877 0.248591073 0.039514306  
0.054815691 0.390584104 0.371793022 0.56328436  
rs34172642:119263336:A:AG ENSG00000111877  
rs6933970:119263480:T:C:ENSG00000111877 0.306174368 0.039514306  
0.054815691 0.472415297 0.490050927 0.628577259  
rs6933970:119263480:T:C ENSG00000111877  
rs6916291:119263859:G:T:ENSG00000111877 0.211426254 0.039514306  
0.054815691 0.326422852 0.069942274 0.477177495  
rs6916291:119263859:G:T ENSG00000111877  
rs6916167:119263962:C:A:ENSG00000111877 0.301603763 0.039514306  
0.054815691 0.478009532 0.490050927 0.645310165  
rs6916167:119263962:C:A ENSG00000111877  
rs6916168:119263963:C:T:ENSG00000111877 0.215796307 0.039514306  
0.054815691 0.314254491 0.112902598 0.494607223  
rs6916168:119263963:C:T ENSG00000111877  
rs6916672:119264042:G:A:ENSG00000111877 0.301603763 0.039514306  
0.054815691 0.478009532 0.490050927 0.645310165  
rs6916672:119264042:G:A ENSG00000111877  
rs56022752:119264237:A:G:ENSG00000111877 0.215796307 0.039514306  
0.054815691 0.314254491 0.148497947 0.494607223  
rs56022752:119264237:A:G ENSG00000111877  
rs55978448:119264313:A:G:ENSG00000111877 0.28152348 0.039514306  
0.054815691 0.419678998 0.371793022 0.605346151  
rs55978448:119264313:A:G ENSG00000111877  
rs7758729:119264766:G:A:ENSG00000111877 0.330291618 0.039514306  
0.090437058 0.486971863 0.477032507 0.657031972  
rs7758729:119264766:G:A ENSG00000111877  
rs35225305:119265001:G:GC:ENSG00000111877 0.271758927 0.039514306  
0.054815691 0.429269101 0.355219989 0.562535698  
rs35225305:119265001:G:GC ENSG00000111877  
JHU\_6.119265033:ENSG00000111877 0.319232036 0.039514306 0.054815691  
0.486971863 0.519536868 0.657031972 JHU\_6.119265033 ENSG00000111877  
rs7758849:119265105:A:G:ENSG00000111877 0.190392053 0.039514306  
0.054815691 0.244282474 0.173591669 0.477177495  
rs7758849:119265105:A:G ENSG00000111877  
rs7758862:119265131:A:G:ENSG00000111877 0.271758927 0.039514306  
0.054815691 0.408307051 0.371793022 0.56162725  
rs7758862:119265131:A:G ENSG00000111877  
rs9489563:119265260:A:G:ENSG00000111877 0.332523749 0.039514306  
0.090437058 0.486971863 0.525520858 0.672369682  
rs9489563:119265260:A:G ENSG00000111877

rs6903220:119265525:T:G:ENSG00000111877 0.271758927 0.039514306  
0.054815691 0.408307051 0.371793022 0.56162725  
rs6903220:119265525:T:G ENSG00000111877  
rs6923637:119265560:G:T:ENSG00000111877 0.39944164 0.039514306  
0.054815691 0.491850645 0.450253392 0.810897194  
rs6923637:119265560:G:T ENSG00000111877  
rs6569035:119265887:T:C:ENSG00000111877 0.304041304 0.039514306  
0.054815691 0.478009532 0.493250562 0.643131518  
rs6569035:119265887:T:C ENSG00000111877  
rs6940120:119266455:A:G:ENSG00000111877 0.215796307 0.039514306  
0.054815691 0.290136921 0.148497947 0.491393172  
rs6940120:119266455:A:G ENSG00000111877  
rs6901738:119266634:C:T:ENSG00000111877 0.304041304 0.039514306  
0.054815691 0.478009532 0.493250562 0.643131518  
rs6901738:119266634:C:T ENSG00000111877  
rs9489569:119267025:A:G:ENSG00000111877 0.215796307 0.039514306  
0.054815691 0.290136921 0.148497947 0.491393172  
rs9489569:119267025:A:G ENSG00000111877  
rs9387613:119267138:T:C:ENSG00000111877 0.333587289 0.039514306  
0.054815691 0.491850645 0.532319281 0.660124342  
rs9387613:119267138:T:C ENSG00000111877  
rs35886801:119267266:TCA:T:ENSG00000111877 0.305615864 0.039514306  
0.054815691 0.478009532 0.493250562 0.638312381  
rs35886801:119267266:TCA:T ENSG00000111877  
rs9401103:119267393:T:C:ENSG00000111877 0.215796307 0.039514306  
0.054815691 0.301206855 0.112902598 0.494607223  
rs9401103:119267393:T:C ENSG00000111877  
rs9385060:119267505:C:T:ENSG00000111877 0.271758927 0.039514306  
0.054815691 0.406267798 0.363699827 0.562535698  
rs9385060:119267505:C:T ENSG00000111877  
rs9374763:119267522:A:G:ENSG00000111877 0.332523749 0.039514306  
0.090437058 0.486971863 0.525520858 0.674365303  
rs9374763:119267522:A:G ENSG00000111877  
rs9374764:119267551:G:A:ENSG00000111877 0.340915103 0.039514306  
0.090437058 0.491850645 0.538368464 0.709269161  
rs9374764:119267551:G:A ENSG00000111877  
rs9374765:119267560:A:G:ENSG00000111877 0.271758927 0.039514306  
0.054815691 0.387628207 0.311775972 0.556049114  
rs9374765:119267560:A:G ENSG00000111877  
rs9387614:119267710:C:T:ENSG00000111877 0.271758927 0.039514306  
0.054815691 0.408307051 0.381322091 0.56328436  
rs9387614:119267710:C:T ENSG00000111877  
rs9372517:119267711:A:G:ENSG00000111877 0.336997499 0.039514306  
0.090437058 0.491850645 0.526407644 0.674365303  
rs9372517:119267711:A:G ENSG00000111877  
rs9374766:119267799:A:G:ENSG00000111877 0.343365679 0.039514306  
0.090437058 0.492233123 0.54593522 0.710464737  
rs9374766:119267799:A:G ENSG00000111877  
rs9968863:119267939:A:C:ENSG00000111877 0.271758927 0.039514306  
0.054815691 0.395341642 0.340307796 0.556049114  
rs9968863:119267939:A:C ENSG00000111877  
rs9374767:119268073:G:A:ENSG00000111877 0.305615864 0.039514306  
0.054815691 0.478009532 0.493250562 0.643131518  
rs9374767:119268073:G:A ENSG00000111877

rs4946380:119268356:G:A:ENSG00000111877 0.215796307 0.039514306  
0.054815691 0.301206855 0.112902598 0.491393172  
rs4946380:119268356:G:A ENSG00000111877  
rs77458334:119268429:TATC:T:ENSG00000111877 0.305615864 0.039514306  
0.054815691 0.478009532 0.493250562 0.643131518  
rs77458334:119268429:TATC:T ENSG00000111877  
rs4946381:119268590:G:A:ENSG00000111877 0.215796307 0.039514306  
0.054815691 0.301206855 0.112902598 0.491393172  
rs4946381:119268590:G:A ENSG00000111877  
rs9489570:119268798:G:T:ENSG00000111877 0.305615864 0.039514306  
0.054815691 0.478009532 0.493250562 0.643131518  
rs9489570:119268798:G:T ENSG00000111877  
rs58360072:119269206:C:T:ENSG00000111877 0.215796307 0.039514306  
0.054815691 0.301206855 0.112902598 0.491393172  
rs58360072:119269206:C:T ENSG00000111877  
rs11759256:119269247:C:T:ENSG00000111877 0.305615864 0.039514306  
0.054815691 0.478009532 0.493250562 0.638312381  
rs11759256:119269247:C:T ENSG00000111877  
rs9385061:119269426:T:C:ENSG00000111877 0.215796307 0.039514306  
0.054815691 0.301206855 0.112902598 0.491393172  
rs9385061:119269426:T:C ENSG00000111877  
rs11754618:119269489:A:G:ENSG00000111877 0.271758927 0.039514306  
0.054815691 0.406267798 0.363699827 0.562535698  
rs11754618:119269489:A:G ENSG00000111877  
rs9387617:119270783:G:A:ENSG00000111877 0.332523749 0.039514306  
0.090437058 0.486971863 0.525520858 0.674365303  
rs9387617:119270783:G:A ENSG00000111877  
rs9401104:119271206:A:G:ENSG00000111877 0.305615864 0.039514306  
0.054815691 0.478009532 0.493250562 0.640308963  
rs9401104:119271206:A:G ENSG00000111877  
rs9401105:119271274:A:G:ENSG00000111877 0.215796307 0.039514306  
0.054815691 0.301206855 0.112902598 0.494607223  
rs9401105:119271274:A:G ENSG00000111877  
rs6932466:119271820:C:G:ENSG00000111877 0.297292124 0.039514306  
0.054815691 0.481611326 0.498016841 0.638312381  
rs6932466:119271820:C:G ENSG00000111877  
rs139612448:119273014:CTTGAT:C:ENSG00000111877 0.215796307  
0.039514306 0.054815691 0.301206855 0.148497947 0.494607223  
rs139612448:119273014:CTTGAT:C ENSG00000111877  
rs79855181:119273025:G:A:ENSG00000111877 0.305615864 0.039514306  
0.054815691 0.478009532 0.493250562 0.640308963  
rs79855181:119273025:G:A ENSG00000111877  
rs9385063:119273111:C:A:ENSG00000111877 0.326821943 0.039514306  
0.054815691 0.276782326 0.388754065 0.6481702  
rs9385063:119273111:C:A ENSG00000111877  
rs9401106:119273588:T:A:ENSG00000111877 0.305615864 0.039514306  
0.054815691 0.478009532 0.493250562 0.640308963  
rs9401106:119273588:T:A ENSG00000111877  
rs9402289:131148486:C:T:ENSG00000256162 0.22504072 0.039514306  
0.568513848 0.072575018 0.429827068 0.813853703  
rs9402289:131148486:C:T ENSG00000256162  
rs9388856:131148863:A:T:ENSG00000256162 0.22504072 0.039514306  
0.568513848 0.072575018 0.429827068 0.813853703  
rs9388856:131148863:A:T ENSG00000256162



rs612852:160693055:T:A:ENSG00000230234 0.035322296 0.089622533  
0.767962809 0.401539023 0.410008196 0.468334324  
rs612852:160693055:T:A ENSG00000230234  
rs497039:160693213:G:C:ENSG00000230234 0.035322296 0.229789644  
0.812077641 0.459055393 0.484480155 0.532059322  
rs497039:160693213:G:C ENSG00000230234  
rs611950:160693266:C:G:ENSG00000230234 0.035322296 0.039514306  
0.739251903 0.301206855 0.251839208 0.347302535  
rs611950:160693266:C:G ENSG00000230234  
rs599507:160693727:A:G:ENSG00000230234 0.035322296 0.039514306  
0.721465596 0.333474506 0.279727316 0.369977602  
rs599507:160693727:A:G ENSG00000230234  
rs599494:160693736:G:C:ENSG00000230234 0.035322296 0.089622533  
0.767962809 0.401539023 0.410008196 0.468334324  
rs599494:160693736:G:C ENSG00000230234  
rs598969:160693906:C:T:ENSG00000230234 0.035322296 0.229789644  
0.812077641 0.459055393 0.484480155 0.532059322  
rs598969:160693906:C:T ENSG00000230234  
rs598135:ENSG00000230234 0.035322296 0.039514306 0.739251903  
0.301206855 0.251839208 0.347302535 rs598135 ENSG00000230234  
rs554811:160694952:C:T:ENSG00000230234 0.035322296 0.039514306  
0.689151367 0.326422852 0.279727316 0.358316132  
rs554811:160694952:C:T ENSG00000230234  
rs582280:160695270:A:G:ENSG00000230234 0.035322296 0.145249232  
0.772899639 0.395341642 0.395007577 0.447199093  
rs582280:160695270:A:G ENSG00000230234  
rs581836:160695320:A:G:ENSG00000230234 0.035322296 0.240653097  
0.818979265 0.484670506 0.525520858 0.549252346  
rs581836:160695320:A:G ENSG00000230234  
rs472478:160695677:T:C:ENSG00000230234 0.035322296 0.039514306  
0.739251903 0.301206855 0.251839208 0.347302535  
rs472478:160695677:T:C ENSG00000230234  
rs473341:160695773:C:G:ENSG00000230234 0.035322296 0.039514306  
0.721465596 0.326422852 0.279727316 0.369977602  
rs473341:160695773:C:G ENSG00000230234  
rs478112:160696318:G:T:ENSG00000230234 0.035322296 0.089622533  
0.756966764 0.399004389 0.395007577 0.464247637  
rs478112:160696318:G:T ENSG00000230234  
rs662421:160696828:C:T:ENSG00000230234 0.035322296 0.229789644  
0.786960718 0.438119062 0.450253392 0.522761587  
rs662421:160696828:C:T ENSG00000230234  
6:167680715:T:G:ENSG00000130396 0.035322296 0.039514306 0.054815691  
0.072575018 0.069942274 0.063994875 6:167680715:T:G ENSG00000130396  
rs3779357:8298523:A:G:ENSG00000003147 0.175415731 0.039514306  
0.054815691 0.072575018 0.595947504 0.269135872 rs3779357:8298523:A:G  
ENSG00000003147  
rs3779356:ENSG00000003147 0.18193752 0.039514306 0.054815691  
0.072575018 0.595947504 0.269135872 rs3779356 ENSG00000003147  
rs145228098:ENSG00000146666 0.205647498 0.039514306 0.222302049  
0.226823504 0.148497947 0.464247637 rs145228098 ENSG00000146666  
rs816250:56221069:G:A:ENSG00000226278 0.441365231 0.039514306  
0.568513848 0.558498626 0.504458419 0.681432383 rs816250:56221069:G:A  
ENSG00000226278

rs34384912:56225720:AT:A:ENSG00000226278 0.498191818 0.039514306  
0.548514013 0.512101623 0.198669295 0.566496688  
rs34384912:56225720:AT:A ENSG00000226278  
rs150192681:65681261:ATTACTGATTTTCATAATTGAGTCTTCTCTCTT:A:ENSG00000231234  
0.035322296 0.567182881 0.515964 0.637390127 0.825258108  
0.511827661  
rs150192681:65681261:ATTACTGATTTTCATAATTGAGTCTTCTCTCTT:A  
ENSG00000231234  
rs6952182:65683317:T:G:ENSG00000179406 0.117465891 0.039514306  
0.054815691 0.072575018 0.069942274 0.447199093  
rs6952182:65683317:T:G ENSG00000179406  
rs6952182:65683317:T:G:ENSG00000231234 0.035322296 0.502579396  
0.731144493 0.558498626 0.9305498 0.140342165  
rs6952182:65683317:T:G ENSG00000231234  
rs10272149:65684132:G:A:ENSG00000179406 0.035322296 0.039514306  
0.054815691 0.072575018 0.069942274 0.295623551  
rs10272149:65684132:G:A ENSG00000179406  
rs6963646:65685767:T:C:ENSG00000179406 0.271758927 0.039514306  
0.054815691 0.072575018 0.069942274 0.471730191  
rs6963646:65685767:T:C ENSG00000179406  
rs6964437:65686444:A:G:ENSG00000179406 0.117465891 0.039514306  
0.054815691 0.072575018 0.069942274 0.447199093  
rs6964437:65686444:A:G ENSG00000179406  
rs28682868:65689809:C:T:ENSG00000179406 0.271758927 0.039514306  
0.054815691 0.072575018 0.069942274 0.471730191  
rs28682868:65689809:C:T ENSG00000179406  
rs138088816:65690580:C:CAGAG:ENSG00000179406 0.035322296 0.039514306  
0.054815691 0.072575018 0.069942274 0.467974804  
rs138088816:65690580:C:CAGAG ENSG00000179406  
rs368405526:65692015:C:CTTTTTTTT:ENSG00000179406 0.035322296  
0.039514306 0.054815691 0.072575018 0.069942274 0.468334324  
rs368405526:65692015:C:CTTTTTTTT ENSG00000179406  
rs4718328:65693337:A:G:ENSG00000179406 0.035322296 0.039514306  
0.054815691 0.072575018 0.069942274 0.468334324  
rs4718328:65693337:A:G ENSG00000179406  
rs138232372:65708928:ATT:A:ENSG00000179406 0.035322296 0.12731097  
0.054815691 0.072575018 0.069942274 0.201281701  
rs138232372:65708928:ATT:A ENSG00000179406  
rs4718330:65715243:G:A:ENSG00000179406 0.035322296 0.039514306  
0.054815691 0.072575018 0.069942274 0.441545027  
rs4718330:65715243:G:A ENSG00000179406  
rs12537823:65720884:A:G:ENSG00000179406 0.035322296 0.039514306  
0.054815691 0.072575018 0.069942274 0.441545027  
rs12537823:65720884:A:G ENSG00000179406  
rs10282433:65721439:G:A:ENSG00000179406 0.035322296 0.039514306  
0.054815691 0.072575018 0.069942274 0.441545027  
rs10282433:65721439:G:A ENSG00000179406  
JHU\_7.65726614:ENSG00000179406 0.035322296 0.039514306 0.054815691  
0.072575018 0.069942274 0.441545027 JHU\_7.65726614 ENSG00000179406  
rs6960476:65733113:T:C:ENSG00000179406 0.23344096 0.039514306  
0.054815691 0.072575018 0.069942274 0.457928806  
rs6960476:65733113:T:C ENSG00000179406

rs6971752:65737986:G:A:ENSG00000179406 0.035322296 0.066642396  
0.054815691 0.072575018 0.069942274 0.460921055  
rs6971752:65737986:G:A ENSG00000179406  
rs10950033:65739673:A:G:ENSG00000179406 0.035322296 0.039514306  
0.054815691 0.072575018 0.069942274 0.477177495  
rs10950033:65739673:A:G ENSG00000179406  
rs11760844:65739883:C:G:ENSG00000179406 0.035322296 0.039514306  
0.054815691 0.072575018 0.069942274 0.4815871  
rs11760844:65739883:C:G ENSG00000179406  
rs10257427:65743208:T:C:ENSG00000179406 0.271758927 0.039514306  
0.054815691 0.072575018 0.069942274 0.491393172  
rs10257427:65743208:T:C ENSG00000179406  
rs4149461:65744732:T:C:ENSG00000179406 0.035322296 0.039514306  
0.054815691 0.072575018 0.069942274 0.4815871  
rs4149461:65744732:T:C ENSG00000179406  
rs778714:65849402:A:T:ENSG00000231234 0.035322296 0.65775398  
0.464882715 0.716753308 0.690981753 0.813853703 rs778714:65849402:A:T  
ENSG00000231234  
7:66027353:C:CAGTGAGTGG:ENSG00000179406 0.035322296 0.12731097  
0.054815691 0.072575018 0.069942274 0.590052663  
7:66027353:C:CAGTGAGTGG ENSG00000179406  
rs7793723:66086655:T:C:ENSG00000179406 0.035322296 0.039514306  
0.054815691 0.072575018 0.069942274 0.468334324  
rs7793723:66086655:T:C ENSG00000179406  
rs4718436:66451738:G:T:ENSG00000179406 0.035322296 0.039514306  
0.054815691 0.072575018 0.069942274 0.510329036  
rs4718436:66451738:G:T ENSG00000179406  
rs9691413:73247204:G:A:ENSG00000165171 0.035322296 0.12731097  
0.528262409 0.751091602 0.949680124 0.813853703  
rs9691413:73247204:G:A ENSG00000165171  
rs4286826:73248586:C:T:ENSG00000165171 0.035322296 0.110495165  
0.495886418 0.723001209 0.948913883 0.813853703  
rs4286826:73248586:C:T ENSG00000165171  
rs13246460:73249165:T:A:ENSG00000165171 0.035322296 0.039514306 0.42239248  
0.720321711 0.947231409 0.813853703 rs13246460:73249165:T:A  
ENSG00000165171  
rs12704986:97986430:T:C:ENSG00000164713 0.132837758 0.039514306  
0.671106111 0.333474506 0.288162171 0.503271951  
rs12704986:97986430:T:C ENSG00000164713  
rs886620:98874368:T:C:ENSG00000106258 0.146968287 0.039514306  
0.398350929 0.276782326 0.355219989 0.108665807 rs886620:98874368:T:C  
ENSG00000106258  
rs60612724:98874892:A:G:ENSG00000106258 0.146968287 0.039514306  
0.269469279 0.333474506 0.279727316 0.140342165  
rs60612724:98874892:A:G ENSG00000106258  
rs10238028:99208899:A:G:ENSG00000106258 0.035322296 0.039514306  
0.054815691 0.072575018 0.069942274 0.063994875  
rs10238028:99208899:A:G ENSG00000106258  
rs7808022:99220083:A:C:ENSG00000106258 0.035322296 0.039514306  
0.054815691 0.072575018 0.069942274 0.063994875  
rs7808022:99220083:A:C ENSG00000106258  
rs13362853:99223147:T:C:ENSG00000106258 0.035322296 0.039514306  
0.054815691 0.072575018 0.069942274 0.063994875  
rs13362853:99223147:T:C ENSG00000106258

JHU\_7.99223958:ENSG00000106258 0.035322296 0.039514306 0.054815691  
0.072575018 0.069942274 0.063994875 JHU\_7.99223958 ENSG00000106258  
exm2258543:ENSG00000106258 0.035322296 0.039514306 0.054815691  
0.072575018 0.069942274 0.063994875 exm2258543 ENSG00000106258  
rs3735453:99229435:T:C:ENSG00000106258 0.035322296 0.039514306  
0.054815691 0.072575018 0.069942274 0.063994875  
rs3735453:99229435:T:C ENSG00000106258  
rs10229552:99234899:T:A:ENSG00000106258 0.035322296 0.039514306  
0.054815691 0.072575018 0.112902598 0.063994875  
rs10229552:99234899:T:A ENSG00000106258  
rs6465750:99235522:C:T:ENSG00000106258 0.117465891 0.039514306  
0.054815691 0.165229468 0.445056985 0.063994875  
rs6465750:99235522:C:T ENSG00000106258  
rs10242455:ENSG00000106258 0.035322296 0.039514306 0.054815691  
0.072575018 0.069942274 0.063994875 rs10242455 ENSG00000106258  
7:99245080-A-C:ENSG00000106258 0.035322296 0.039514306 0.054815691  
0.072575018 0.395007577 0.063994875 7:99245080-A-C ENSG00000106258  
rs15524:ENSG00000106258 0.035322296 0.039514306 0.054815691  
0.072575018 0.069942274 0.063994875 rs15524 ENSG00000106258  
rs12334077:99251868:A:C:ENSG00000106258 0.035322296 0.039514306  
0.054815691 0.072575018 0.148497947 0.063994875  
rs12334077:99251868:A:C ENSG00000106258  
rs12333599:99252179:G:C:ENSG00000106258 0.035322296 0.039514306  
0.054815691 0.072575018 0.069942274 0.063994875  
rs12333599:99252179:G:C ENSG00000106258  
rs147777800:99253977:G:A:ENSG00000106258 0.035322296 0.039514306  
0.054815691 0.072575018 0.069942274 0.063994875  
rs147777800:99253977:G:A ENSG00000106258  
rs10227637:99255760:A:G:ENSG00000106258 0.035322296 0.039514306  
0.054815691 0.072575018 0.069942274 0.063994875  
rs10227637:99255760:A:G ENSG00000106258  
rs7780328:99256844:A:G:ENSG00000106258 0.035322296 0.039514306  
0.054815691 0.072575018 0.069942274 0.063994875  
rs7780328:99256844:A:G ENSG00000106258  
rs10258552:99257419:T:C:ENSG00000106258 0.035322296 0.039514306  
0.054815691 0.072575018 0.069942274 0.063994875  
rs10258552:99257419:T:C ENSG00000106258  
7:99270539-C-T:ENSG00000106258 0.035322296 0.039514306 0.054815691  
0.072575018 0.069942274 0.063994875 7:99270539-C-T ENSG00000106258  
rs776739:99283696:T:C:ENSG00000106258 0.035322296 0.039514306  
0.054815691 0.072575018 0.069942274 0.063994875 rs776739:99283696:T:C  
ENSG00000106258  
rs776745:99291337:T:G:ENSG00000106258 0.035322296 0.039514306  
0.054815691 0.072575018 0.069942274 0.063994875 rs776745:99291337:T:G  
ENSG00000106258  
rs776744:99292047:C:T:ENSG00000106258 0.035322296 0.039514306  
0.054815691 0.072575018 0.069942274 0.063994875 rs776744:99292047:C:T  
ENSG00000106258  
rs11353593:99292208:TG:T:ENSG00000106258 0.035322296 0.039514306  
0.054815691 0.072575018 0.069942274 0.063994875  
rs11353593:99292208:TG:T ENSG00000106258  
rs61017966:99292379:CCA:C:ENSG00000106258 0.035322296 0.039514306  
0.054815691 0.072575018 0.069942274 0.063994875  
rs61017966:99292379:CCA:C ENSG00000106258

rs776742:99292755:C:T:ENSG00000106258 0.035322296 0.039514306  
0.054815691 0.072575018 0.069942274 0.063994875 rs776742:99292755:C:T  
ENSG00000106258

rs2740565:99293475:T:A:ENSG00000106258 0.035322296 0.039514306  
0.054815691 0.072575018 0.069942274 0.063994875  
rs2740565:99293475:T:A ENSG00000106258

rs2687087:99294472:G:A:ENSG00000106258 0.035322296 0.039514306  
0.054815691 0.072575018 0.069942274 0.063994875  
rs2687087:99294472:G:A ENSG00000106258

rs1879859:99294762:C:T:ENSG00000106258 0.035322296 0.039514306  
0.054815691 0.072575018 0.069942274 0.063994875  
rs1879859:99294762:C:T ENSG00000106258

rs2687086:99295450:C:T:ENSG00000106258 0.035322296 0.039514306  
0.054815691 0.072575018 0.069942274 0.063994875  
rs2687086:99295450:C:T ENSG00000106258

JHU\_7.99295692:ENSG00000106258 0.035322296 0.039514306 0.054815691  
0.072575018 0.069942274 0.063994875 JHU\_7.99295692 ENSG00000106258

rs10629992:99295703:C:CTGTT:ENSG00000106258 0.035322296 0.039514306  
0.054815691 0.072575018 0.069942274 0.063994875  
rs10629992:99295703:C:CTGTT ENSG00000106258

rs1818797:99296195:G:A:ENSG00000106258 0.035322296 0.039514306  
0.054815691 0.072575018 0.069942274 0.063994875  
rs1818797:99296195:G:A ENSG00000106258

rs2687085:99296686:A:G:ENSG00000106258 0.035322296 0.039514306  
0.054815691 0.072575018 0.069942274 0.063994875  
rs2687085:99296686:A:G ENSG00000106258

rs2948344:99297011:G:A:ENSG00000106258 0.035322296 0.039514306  
0.054815691 0.072575018 0.069942274 0.063994875  
rs2948344:99297011:G:A ENSG00000106258

rs2948343:99297019:G:A:ENSG00000106258 0.035322296 0.039514306  
0.054815691 0.072575018 0.069942274 0.063994875  
rs2948343:99297019:G:A ENSG00000106258

rs2177180:99297804:C:T:ENSG00000106258 0.035322296 0.039514306  
0.054815691 0.072575018 0.069942274 0.063994875  
rs2177180:99297804:C:T ENSG00000106258

rs2687084:99298132:C:A:ENSG00000106258 0.035322296 0.039514306  
0.054815691 0.072575018 0.069942274 0.063994875  
rs2687084:99298132:C:A ENSG00000106258

rs56061748:99299558:CTT:C:ENSG00000106258 0.035322296 0.039514306  
0.054815691 0.072575018 0.069942274 0.063994875  
rs56061748:99299558:CTT:C ENSG00000106258

rs1851425:99300231:G:A:ENSG00000106258 0.035322296 0.039514306  
0.054815691 0.072575018 0.069942274 0.063994875  
rs1851425:99300231:G:A ENSG00000106258

rs2687081:ENSG00000106258 0.035322296 0.039514306 0.054815691  
0.072575018 0.069942274 0.063994875 rs2687081 ENSG00000106258

rs2740563:99302113:T:C:ENSG00000106258 0.035322296 0.039514306  
0.054815691 0.072575018 0.069942274 0.063994875  
rs2740563:99302113:T:C ENSG00000106258

rs10211:ENSG00000106258 0.035322296 0.039514306 0.054815691  
0.072575018 0.069942274 0.063994875 rs10211 ENSG00000106258

rs12360:99303094:G:A:ENSG00000106258 0.035322296 0.039514306  
0.054815691 0.072575018 0.069942274 0.063994875 rs12360:99303094:G:A  
ENSG00000106258

rs4646465:99304524:A:G:ENSG00000106258 0.035322296 0.039514306  
0.054815691 0.072575018 0.069942274 0.063994875  
rs4646465:99304524:A:G ENSG00000106258  
rs2687079:99304618:T:A:ENSG00000106258 0.035322296 0.039514306  
0.054815691 0.072575018 0.069942274 0.063994875  
rs2687079:99304618:T:A ENSG00000106258  
rs2687078:99304712:C:T:ENSG00000106258 0.035322296 0.039514306  
0.054815691 0.072575018 0.069942274 0.063994875  
rs2687078:99304712:C:T ENSG00000106258  
rs1403196:99306321:G:T:ENSG00000106258 0.035322296 0.039514306  
0.054815691 0.072575018 0.069942274 0.063994875  
rs1403196:99306321:G:T ENSG00000106258  
rs145102165:99309404:A:AAAC:ENSG00000106258 0.035322296 0.039514306  
0.054815691 0.072575018 0.069942274 0.063994875  
rs145102165:99309404:A:AAAC ENSG00000106258  
rs2687135:99326309:T:G:ENSG00000106258 0.035322296 0.039514306  
0.054815691 0.072575018 0.069942274 0.063994875  
rs2687135:99326309:T:G ENSG00000106258  
rs2687134:ENSG00000106258 0.035322296 0.039514306 0.054815691  
0.072575018 0.069942274 0.063994875 rs2687134 ENSG00000106258  
rs2687133:99332083:C:T:ENSG00000106258 0.035322296 0.039514306  
0.054815691 0.072575018 0.069942274 0.063994875  
rs2687133:99332083:C:T ENSG00000106258  
rs6963623:99348244:A:T:ENSG00000244219 0.035322296 0.514230442  
0.390230616 0.244282474 0.54593522 0.550290331  
rs6963623:99348244:A:T ENSG00000244219  
rs6945984:99348328:T:C:ENSG00000106258 0.117465891 0.039514306  
0.054815691 0.326422852 0.455878819 0.108665807  
rs6945984:99348328:T:C ENSG00000106258  
rs113394776:99351463:A:G:ENSG00000244219 0.035322296 0.514230442  
0.390230616 0.244282474 0.54593522 0.553258882  
rs113394776:99351463:A:G ENSG00000244219  
rs28878860:99352020:A:G:ENSG00000106258 0.146968287 0.039514306  
0.054815691 0.290136921 0.279727316 0.063994875  
rs28878860:99352020:A:G ENSG00000106258  
rs3991809:99352766:G:T:ENSG00000106258 0.146968287 0.039514306  
0.054815691 0.290136921 0.279727316 0.063994875  
rs3991809:99352766:G:T ENSG00000106258  
rs2404955:99353279:G:A:ENSG00000106258 0.117465891 0.039514306  
0.054815691 0.326422852 0.455878819 0.108665807  
rs2404955:99353279:G:A ENSG00000106258  
rs12333983:99354114:T:A:ENSG00000106258 0.146968287 0.039514306  
0.054815691 0.290136921 0.279727316 0.063994875  
rs12333983:99354114:T:A ENSG00000106258  
rs3735451:ENSG00000106258 0.117465891 0.039514306 0.054815691  
0.326422852 0.455878819 0.108665807 rs3735451 ENSG00000106258  
rs28988598:99357047:GCA:G:ENSG00000106258 0.243759522 0.039514306  
0.054815691 0.406267798 0.403448628 0.063994875  
rs28988598:99357047:GCA:G ENSG00000106258  
rs4609128:102662540:A:G:ENSG00000170632 0.035322296 0.039514306  
0.571157005 0.387628207 0.069942274 0.063994875  
rs4609128:102662540:A:G ENSG00000170632



rs952879:102666696:C:T:ENSG00000170632 0.100009087 0.039514306  
0.728288658 0.478009532 0.069942274 0.063994875  
rs952879:102666696:C:T ENSG00000170632  
rs1404213:102716915:G:A:ENSG00000170632 0.035322296 0.039514306  
0.568513848 0.244282474 0.069942274 0.063994875  
rs1404213:102716915:G:A ENSG00000170632  
rs146660143:102717291:AAAAC:A:ENSG00000170632 0.035322296 0.039514306  
0.531748779 0.276782326 0.069942274 0.063994875  
rs146660143:102717291:AAAAC:A ENSG00000170632  
rs6979140:102717530:T:C:ENSG00000170632 0.035322296 0.039514306  
0.568513848 0.072575018 0.069942274 0.063994875  
rs6979140:102717530:T:C ENSG00000170632  
rs10808122:102721980:T:C:ENSG00000170632 0.035322296 0.039514306  
0.568513848 0.301206855 0.148497947 0.063994875  
rs10808122:102721980:T:C ENSG00000170632  
JHU\_7.102722158:ENSG00000170632 0.035322296 0.039514306 0.568513848  
0.314254491 0.148497947 0.063994875 JHU\_7.102722158 ENSG00000170632  
rs11451142:102722954:T:TA:ENSG00000170632 0.035322296 0.039514306  
0.618696386 0.429269101 0.251839208 0.063994875  
rs11451142:102722954:T:TA ENSG00000170632  
rs112008759:102725605:A:AGAGTAG:ENSG00000170632 0.035322296  
0.039514306 0.531748779 0.276782326 0.069942274 0.063994875  
rs112008759:102725605:A:AGAGTAG ENSG00000170632  
rs60318301:102731429:A:AT:ENSG00000170632 0.035322296 0.039514306  
0.560108139 0.276782326 0.069942274 0.063994875  
rs60318301:102731429:A:AT ENSG00000170632  
rs11317843:102732701:AC:A:ENSG00000170632 0.035322296 0.039514306  
0.531748779 0.276782326 0.069942274 0.063994875  
rs11317843:102732701:AC:A ENSG00000170632  
rs1861730:102734600:G:T:ENSG00000170632 0.035322296 0.039514306  
0.568513848 0.301206855 0.148497947 0.063994875  
rs1861730:102734600:G:T ENSG00000170632  
rs4729878:102735886:C:T:ENSG00000170632 0.035322296 0.039514306  
0.531748779 0.276782326 0.069942274 0.063994875  
rs4729878:102735886:C:T ENSG00000170632  
rs10953378:102736394:G:T:ENSG00000170632 0.035322296 0.039514306  
0.63054575 0.379688866 0.266901314 0.063994875  
rs10953378:102736394:G:T ENSG00000170632  
rs2041949:102737251:C:A:ENSG00000170632 0.035322296 0.039514306  
0.580001614 0.326422852 0.148497947 0.063994875  
rs2041949:102737251:C:A ENSG00000170632  
rs2193418:102737411:A:G:ENSG00000170632 0.035322296 0.039514306  
0.617968597 0.379688866 0.069942274 0.063994875  
rs2193418:102737411:A:G ENSG00000170632  
rs13226097:102737947:A:G:ENSG00000170632 0.035322296 0.039514306  
0.568513848 0.072575018 0.069942274 0.063994875  
rs13226097:102737947:A:G ENSG00000170632  
rs1861728:102738400:A:T:ENSG00000170632 0.035322296 0.039514306  
0.531748779 0.276782326 0.069942274 0.063994875  
rs1861728:102738400:A:T ENSG00000170632  
rs10808123:102738574:A:C:ENSG00000170632 0.035322296 0.039514306  
0.531748779 0.276782326 0.069942274 0.063994875  
rs10808123:102738574:A:C ENSG00000170632

rs6950177:ENSG00000170632 0.035322296 0.039514306 0.443593462  
0.072575018 0.069942274 0.063994875 rs6950177 ENSG00000170632  
rs7783856:102741034:A:G:ENSG00000170632 0.035322296 0.066642396  
0.568366244 0.276782326 0.112902598 0.063994875  
rs7783856:102741034:A:G ENSG00000170632  
rs7784337:102741093:G:A:ENSG00000170632 0.035322296 0.039514306  
0.568513848 0.072575018 0.069942274 0.063994875  
rs7784337:102741093:G:A ENSG00000170632  
rs6976034:102745350:A:C:ENSG00000170632 0.035322296 0.039514306  
0.568513848 0.326422852 0.148497947 0.063994875  
rs6976034:102745350:A:C ENSG00000170632  
rs10808126:102746155:G:A:ENSG00000170632 0.060909118 0.039514306  
0.575705306 0.314254491 0.148497947 0.063994875  
rs10808126:102746155:G:A ENSG00000170632  
rs10808127:102747696:C:A:ENSG00000170632 0.035322296 0.039514306  
0.568513848 0.333474506 0.148497947 0.063994875  
rs10808127:102747696:C:A ENSG00000170632  
rs6959711:102747901:G:A:ENSG00000170632 0.035322296 0.039514306  
0.568513848 0.314254491 0.173591669 0.063994875  
rs6959711:102747901:G:A ENSG00000170632  
rs2411078:102748654:G:A:ENSG00000170632 0.035322296 0.039514306  
0.618696386 0.399004389 0.112902598 0.063994875  
rs2411078:102748654:G:A ENSG00000170632  
rs4294127:102748680:C:T:ENSG00000170632 0.035322296 0.039514306  
0.618696386 0.406267798 0.112902598 0.063994875  
rs4294127:102748680:C:T ENSG00000170632  
rs6465891:102748834:C:A:ENSG00000170632 0.035322296 0.039514306  
0.545428271 0.276782326 0.069942274 0.063994875  
rs6465891:102748834:C:A ENSG00000170632  
rs6465892:102748879:C:T:ENSG00000170632 0.035322296 0.039514306  
0.458471274 0.072575018 0.069942274 0.063994875  
rs6465892:102748879:C:T ENSG00000170632  
rs6465893:102748917:A:T:ENSG00000170632 0.035322296 0.039514306  
0.548514013 0.276782326 0.069942274 0.063994875  
rs6465893:102748917:A:T ENSG00000170632  
rs4295594:102749131:C:T:ENSG00000170632 0.035322296 0.039514306  
0.548514013 0.276782326 0.069942274 0.063994875  
rs4295594:102749131:C:T ENSG00000170632  
rs79266970:102750327:A:G:ENSG00000170632 0.035322296 0.039514306  
0.568513848 0.333474506 0.148497947 0.063994875  
rs79266970:102750327:A:G ENSG00000170632  
rs9649257:102750932:A:G:ENSG00000170632 0.035322296 0.039514306  
0.458471274 0.072575018 0.069942274 0.063994875  
rs9649257:102750932:A:G ENSG00000170632  
rs4374923:102751553:G:C:ENSG00000170632 0.035322296 0.039514306  
0.545428271 0.276782326 0.069942274 0.063994875  
rs4374923:102751553:G:C ENSG00000170632  
rs1968198:102753856:A:G:ENSG00000170632 0.035322296 0.039514306 0.59314904  
0.333474506 0.148497947 0.063994875 rs1968198:102753856:A:G  
ENSG00000170632  
rs149148671:102754090:TTTC:T:ENSG00000170632 0.035322296 0.039514306  
0.492105461 0.072575018 0.069942274 0.063994875  
rs149148671:102754090:TTTC:T ENSG00000170632

rs7792240:102754943:C:T:ENSG00000170632 0.060909118 0.039514306  
0.572955873 0.301206855 0.148497947 0.063994875  
rs7792240:102754943:C:T ENSG00000170632  
rs4729882:102755330:A:G:ENSG00000170632 0.035322296 0.039514306  
0.568513848 0.333474506 0.148497947 0.063994875  
rs4729882:102755330:A:G ENSG00000170632  
rs7801602:102756540:A:G:ENSG00000170632 0.035322296 0.039514306 0.48190184  
0.072575018 0.069942274 0.063994875 rs7801602:102756540:A:G  
ENSG00000170632  
rs7801969:102756545:G:A:ENSG00000170632 0.035322296 0.039514306  
0.617968597 0.401539023 0.148497947 0.063994875  
rs7801969:102756545:G:A ENSG00000170632  
rs1477163:102757434:C:T:ENSG00000170632 0.035322296 0.039514306  
0.618696386 0.408307051 0.173591669 0.063994875  
rs1477163:102757434:C:T ENSG00000170632  
rs6966961:102758051:T:C:ENSG00000170632 0.035322296 0.039514306  
0.568513848 0.333474506 0.069942274 0.063994875  
rs6966961:102758051:T:C ENSG00000170632  
rs6946968:102758084:C:T:ENSG00000170632 0.035322296 0.039514306  
0.568513848 0.340834261 0.069942274 0.063994875  
rs6946968:102758084:C:T ENSG00000170632  
rs1558853:102760774:A:T:ENSG00000170632 0.035322296 0.066642396  
0.531748779 0.123210094 0.069942274 0.063994875  
rs1558853:102760774:A:T ENSG00000170632  
rs7801094:102783075:T:C:ENSG00000170632 0.035322296 0.039514306  
0.398350929 0.123210094 0.069942274 0.063994875  
rs7801094:102783075:T:C ENSG00000170632  
rs1968197:102785441:C:T:ENSG00000170632 0.035322296 0.039514306  
0.297111757 0.072575018 0.069942274 0.063994875  
rs1968197:102785441:C:T ENSG00000170632  
rs6966876:102791342:A:C:ENSG00000170632 0.100009087 0.039514306 0.14398786  
0.197042097 0.069942274 0.063994875 rs6966876:102791342:A:C  
ENSG00000170632  
rs4480047:102799053:C:A:ENSG00000170632 0.035322296 0.039514306  
0.531748779 0.226823504 0.069942274 0.063994875  
rs4480047:102799053:C:A ENSG00000170632  
rs4428604:102799211:A:G:ENSG00000170632 0.100009087 0.039514306  
0.557353332 0.314254491 0.069942274 0.063994875  
rs4428604:102799211:A:G ENSG00000170632  
rs1861731:ENSG00000170632 0.060909118 0.039514306 0.351078567  
0.123210094 0.069942274 0.063994875 rs1861731 ENSG00000170632  
rs1968202:102800426:A:G:ENSG00000170632 0.035322296 0.039514306  
0.269469279 0.072575018 0.069942274 0.063994875  
rs1968202:102800426:A:G ENSG00000170632  
rs11768828:102810717:A:G:ENSG00000170632 0.146968287 0.039514306  
0.400191924 0.244282474 0.069942274 0.063994875  
rs11768828:102810717:A:G ENSG00000170632  
rs9692089:102816445:T:C:ENSG00000170632 0.100009087 0.039514306  
0.406502841 0.276782326 0.069942274 0.063994875  
rs9692089:102816445:T:C ENSG00000170632  
rs3987890:102868889:C:CTA:ENSG00000170632 0.035322296 0.039514306  
0.238368074 0.197042097 0.069942274 0.063994875  
rs3987890:102868889:C:CTA ENSG00000170632

rs1968196:102881492:G:A:ENSG00000170632 0.035322296 0.039514306  
0.269469279 0.123210094 0.069942274 0.063994875  
rs1968196:102881492:G:A ENSG00000170632  
rs3864442:102881900:C:T:ENSG00000170632 0.035322296 0.039514306  
0.255451763 0.123210094 0.069942274 0.063994875  
rs3864442:102881900:C:T ENSG00000170632  
rs10268112:102883235:G:T:ENSG00000170632 0.035322296 0.039514306  
0.515964 0.301206855 0.148497947 0.063994875  
rs10268112:102883235:G:T ENSG00000170632  
rs10271013:102883362:C:G:ENSG00000170632 0.162871942 0.039514306  
0.406502841 0.350892299 0.069942274 0.108665807  
rs10271013:102883362:C:G ENSG00000170632  
rs10234905:102899403:G:C:ENSG00000170632 0.060909118 0.039514306  
0.324917292 0.244282474 0.069942274 0.063994875  
rs10234905:102899403:G:C ENSG00000170632  
rs7780642:102928412:G:A:ENSG00000170632 0.035322296 0.039514306  
0.255451763 0.165229468 0.069942274 0.063994875  
rs7780642:102928412:G:A ENSG00000170632  
rs2878:102953621:A:G:ENSG00000170632 0.060909118 0.039514306  
0.351078567 0.276782326 0.069942274 0.063994875 rs2878:102953621:A:G  
ENSG00000170632  
rs6971734:102959379:T:C:ENSG00000170632 0.035322296 0.039514306  
0.269469279 0.123210094 0.069942274 0.063994875  
rs6971734:102959379:T:C ENSG00000170632  
rs7810558:102961155:T:C:ENSG00000170632 0.035322296 0.039514306  
0.406502841 0.244282474 0.069942274 0.063994875  
rs7810558:102961155:T:C ENSG00000170632  
rs11354875:102966194:TA:T:ENSG00000170632 0.035322296 0.039514306  
0.360243455 0.123210094 0.069942274 0.063994875  
rs11354875:102966194:TA:T ENSG00000170632  
rs10245155:102968491:T:C:ENSG00000170632 0.035322296 0.039514306  
0.20393713 0.072575018 0.069942274 0.063994875  
rs10245155:102968491:T:C ENSG00000170632  
rs10257369:102971399:T:C:ENSG00000170632 0.035322296 0.039514306  
0.238368074 0.165229468 0.069942274 0.063994875  
rs10257369:102971399:T:C ENSG00000170632  
rs10266523:ENSG00000170632 0.146968287 0.039514306 0.400191924  
0.326422852 0.069942274 0.063994875 rs10266523 ENSG00000170632  
rs2179375:171315646:T:C:ENSG00000076258 0.550074345 0.039514306  
0.828327833 0.650583802 0.54593522 0.813853703  
rs2179375:171315646:T:C ENSG00000076258  
rs6425167:171316890:C:T:ENSG00000076258 0.550074345 0.039514306  
0.828327833 0.650583802 0.54593522 0.813853703  
rs6425167:171316890:C:T ENSG00000076258  
rs10912830:171320395:A:T:ENSG00000076258 0.561800148 0.039514306  
0.853698456 0.687059708 0.734695661 0.813853703  
rs10912830:171320395:A:T ENSG00000076258  
rs1024173:171322798:C:T:ENSG00000076258 0.550074345 0.039514306  
0.828327833 0.650583802 0.54593522 0.813853703  
rs1024173:171322798:C:T ENSG00000076258  
rs6425192:171327628:T:C:ENSG00000076258 0.550398865 0.039514306  
0.828327833 0.651493039 0.54593522 0.813853703  
rs6425192:171327628:T:C ENSG00000076258

rs6425194:171328083:T:C:ENSG00000076258 0.550398865 0.039514306  
0.828327833 0.651493039 0.54593522 0.813853703  
rs6425194:171328083:T:C ENSG00000076258  
rs12760795:171328768:G:T:ENSG00000076258 0.512985696 0.039514306  
0.828327833 0.730273051 0.429827068 0.813853703  
rs12760795:171328768:G:T ENSG00000076258  
rs10912833:171329277:A:G:ENSG00000076258 0.560302816 0.039514306  
0.848201897 0.704092316 0.776230732 0.817031352  
rs10912833:171329277:A:G ENSG00000076258  
rs36145221:171334793:CTGTA:C:ENSG00000076258 0.550820935 0.039514306  
0.828327833 0.651493039 0.54593522 0.813853703  
rs36145221:171334793:CTGTA:C ENSG00000076258  
rs10912842:171334827:C:G:ENSG00000076258 0.562868445 0.039514306  
0.84654092 0.703384182 0.776230732 0.822297613  
rs10912842:171334827:C:G ENSG00000076258  
rs5778699:171353719:CTTT:C:ENSG00000076258 0.551743956 0.039514306  
0.828327833 0.6524842 0.54593522 0.813853703  
rs5778699:171353719:CTTT:C ENSG00000076258  
rs71537927:149982877:C:T:ENSG00000106526 0.035322296 0.240653097  
0.42786084 0.314254491 0.069942274 0.24867752  
rs71537927:149982877:C:T ENSG00000106526  
rs2286450:ENSG00000106526 0.035322296 0.272806835 0.454299825  
0.301206855 0.069942274 0.225997306 rs2286450 ENSG00000106526  
rs28634863:149983565:T:C:ENSG00000106526 0.035322296 0.33968813  
0.351078567 0.276782326 0.069942274 0.282646046  
rs28634863:149983565:T:C ENSG00000106526  
rs2923448:42406008:G:A:ENSG00000254165 0.190392053 0.039514306  
0.828327833 0.764871209 0.900250513 0.063994875  
rs2923448:42406008:G:A ENSG00000254165  
rs7838421:71672323:A:C:ENSG00000221947 0.035322296 0.661628136 0.515964  
0.072575018 0.363699827 0.063994875 rs7838421:71672323:A:C  
ENSG00000221947  
rs78020896:105525228:G:A:ENSG00000147650 0.211426254 0.039514306  
0.054815691 0.454179145 0.925966036 0.108665807  
rs78020896:105525228:G:A ENSG00000147650  
rs4928693:143469813:T:C:ENSG00000171045 0.573203009 0.039514306  
0.664963743 0.671388768 0.9305498 0.813853703  
rs4928693:143469813:T:C ENSG00000171045  
rs10112213:143471654:G:T:ENSG00000171045 0.585881681 0.039514306  
0.613735952 0.707827228 0.9305498 0.79451053  
rs10112213:143471654:G:T ENSG00000171045  
rs28481982:143477967:C:G:ENSG00000171045 0.584140143 0.039514306  
0.668344684 0.595546163 0.941513467 0.840209939  
rs28481982:143477967:C:G ENSG00000171045  
rs896933:144615201:T:C:ENSG00000254859 0.035322296 0.145249232  
0.054815691 0.481611326 0.069942274 0.063994875  
rs896933:144615201:T:C ENSG00000254859  
rs58288565:144631031:A:G:ENSG00000014164 0.035322296 0.682012197  
0.760866298 0.751091602 0.328523647 0.813853703  
rs58288565:144631031:A:G ENSG00000014164  
rs35228013:144631474:A:G:ENSG00000014164 0.035322296 0.681686309  
0.777393854 0.751091602 0.355219989 0.813853703  
rs35228013:144631474:A:G ENSG00000014164

rs619380:17302341:A:G:ENSG00000044459 0.18193752 0.039514306  
0.798594848 0.466610843 0.694942942 0.063994875 rs619380:17302341:A:G  
ENSG00000044459  
rs140957588:17344148:GTTTAT:G:ENSG00000044459 0.196140407 0.039514306  
0.7518355 0.491850645 0.690981753 0.063994875  
rs140957588:17344148:GTTTAT:G ENSG00000044459  
rs10121841:ENSG00000044459 0.260395929 0.039514306 0.819328396  
0.558498626 0.690981753 0.063994875 rs10121841 ENSG00000044459  
rs4961555:17385348:C:T:ENSG00000044459 0.196140407 0.039514306  
0.828327833 0.558498626 0.749667392 0.063994875  
rs4961555:17385348:C:T ENSG00000044459  
rs10123109:17391173:A:G:ENSG00000044459 0.228236375 0.039514306  
0.828327833 0.558498626 0.731951824 0.063994875  
rs10123109:17391173:A:G ENSG00000044459  
rs66533367:34311657:TAC:T:ENSG00000164978 0.035322296 0.159643516  
0.655792554 0.358702521 0.54593522 0.469127215  
rs66533367:34311657:TAC:T ENSG00000164978  
rs138430482:44168848:G:A:ENSG00000236816 0.035322296 0.651399716  
0.61437749 0.645312868 0.429827068 0.457928806  
rs138430482:44168848:G:A ENSG00000236816  
rs28404900:44185058:A:G:ENSG00000170165 0.035322296 0.538459161 0.14398786  
0.459055393 0.069942274 0.201281701 rs28404900:44185058:A:G  
ENSG00000170165  
rs28404900:44185058:A:G:ENSG00000236816 0.035322296 0.654488658  
0.679533134 0.703018054 0.629639249 0.640308963  
rs28404900:44185058:A:G ENSG00000236816  
rs192687885:44215352:T:A:ENSG00000236816 0.035322296 0.639358547  
0.579532834 0.617868032 0.355219989 0.441545027  
rs192687885:44215352:T:A ENSG00000236816  
rs28673370:44224263:A:G:ENSG00000236816 0.035322296 0.621583901  
0.576180386 0.617124137 0.328523647 0.390568128  
rs28673370:44224263:A:G ENSG00000236816  
rs28418462:44227510:G:A:ENSG00000236816 0.035322296 0.651399716  
0.618696386 0.673390714 0.472198515 0.494607223  
rs28418462:44227510:G:A ENSG00000236816  
rs79830345:44228754:C:T:ENSG00000236816 0.035322296 0.654488658  
0.655258797 0.689549544 0.54593522 0.590052663  
rs79830345:44228754:C:T ENSG00000236816  
rs28781918:44234403:C:T:ENSG00000236816 0.035322296 0.651399716  
0.576180386 0.617124137 0.410008196 0.441545027  
rs28781918:44234403:C:T ENSG00000236816  
rs113473983:44235035:G:A:ENSG00000236816 0.035322296 0.651399716  
0.575705306 0.617124137 0.410008196 0.441545027  
rs113473983:44235035:G:A ENSG00000236816  
rs35546747:44257671:TA:T:ENSG00000236816 0.035322296 0.654488658  
0.618696386 0.69625478 0.525520858 0.562535698  
rs35546747:44257671:TA:T ENSG00000236816  
JHU\_9.69407631:ENSG00000235832 0.035322296 0.039514306 0.782434772  
0.491850645 0.625064162 0.282646046 JHU\_9.69407631 ENSG00000235832  
rs363717:ENSG00000136783 0.404030971 0.039514306 0.693319897  
0.751091602 0.9305498 0.629184088 rs363717 ENSG00000136783  
rs4747349:18801234:G:C:ENSG00000240291 0.514609397 0.039514306  
0.090437058 0.340834261 0.526407644 0.369977602  
rs4747349:18801234:G:C ENSG00000240291



rs10741091:18802307:C:G:ENSG00000240291 0.397619131 0.039514306  
0.054815691 0.301206855 0.311775972 0.063994875  
rs10741091:18802307:C:G ENSG00000240291  
rs10400076:18802698:T:A:ENSG00000240291 0.525727277 0.039514306 0.20393713  
0.358702521 0.477032507 0.468334324 rs10400076:18802698:T:A  
ENSG00000240291  
rs7088091:18804094:T:C:ENSG00000240291 0.45169229 0.039514306  
0.054815691 0.424824518 0.525520858 0.063994875  
rs7088091:18804094:T:C ENSG00000240291  
rs4748482:18816236:T:C:ENSG00000240291 0.035322296 0.189251465  
0.054815691 0.395341642 0.7140776 0.638312381  
rs4748482:18816236:T:C ENSG00000240291  
rs7922550:18817083:T:G:ENSG00000240291 0.392134345 0.039514306  
0.090437058 0.558498626 0.749667392 0.447199093  
rs7922550:18817083:T:G ENSG00000240291  
rs7922829:18817374:T:C:ENSG00000240291 0.412281196 0.039514306  
0.054815691 0.677268785 0.835731578 0.453831125  
rs7922829:18817374:T:C ENSG00000240291  
rs10764578:ENSG00000240291 0.035322296 0.039514306 0.054815691  
0.072575018 0.328523647 0.063994875 rs10764578 ENSG00000240291  
rs4747350:18819869:C:G:ENSG00000240291 0.376064036 0.039514306  
0.054815691 0.558498626 0.756739579 0.382106273  
rs4747350:18819869:C:G ENSG00000240291  
rs7917584:18820848:G:A:ENSG00000240291 0.422694319 0.039514306  
0.054815691 0.445043357 0.764551383 0.615926697  
rs7917584:18820848:G:A ENSG00000240291  
rs10764582:18823279:T:A:ENSG00000240291 0.264115932 0.039514306  
0.054815691 0.491850645 0.455878819 0.369977602  
rs10764582:18823279:T:A ENSG00000240291  
rs77082067:18826219:T:C:ENSG00000240291 0.169284753 0.039514306  
0.054815691 0.7025349 0.758499809 0.225997306  
rs77082067:18826219:T:C ENSG00000240291  
rs2272274:18826974:T:C:ENSG00000240291 0.334162828 0.039514306  
0.054815691 0.771395682 0.9305498 0.66967784  
rs2272274:18826974:T:C ENSG00000240291  
rs3841459:18828721:C:CAA:ENSG00000240291 0.239371492 0.039514306  
0.054815691 0.68096883 0.767723787 0.497503372  
rs3841459:18828721:C:CAA ENSG00000240291  
rs10828872:18830618:C:T:ENSG00000240291 0.271758927 0.039514306  
0.054815691 0.491850645 0.477032507 0.358316132  
rs10828872:18830618:C:T ENSG00000240291  
rs10764583:18833812:T:C:ENSG00000240291 0.381061816 0.039514306  
0.054815691 0.491850645 0.069942274 0.063994875  
rs10764583:18833812:T:C ENSG00000240291  
rs3817494:ENSG00000240291 0.291376195 0.039514306 0.054815691  
0.454179145 0.279727316 0.140342165 rs3817494 ENSG00000240291  
rs10828896:18838854:A:G:ENSG00000240291 0.264115932 0.039514306  
0.054815691 0.491850645 0.455878819 0.369977602  
rs10828896:18838854:A:G ENSG00000240291  
rs12569474:18839176:C:T:ENSG00000240291 0.035322296 0.039514306  
0.054815691 0.340834261 0.069942274 0.063994875  
rs12569474:18839176:C:T ENSG00000240291

rs7901598:18839779:G:A:ENSG00000240291 0.035322296 0.039514306  
0.054815691 0.358702521 0.069942274 0.063994875  
rs7901598:18839779:G:A ENSG00000240291  
rs10828911:18843358:G:A:ENSG00000240291 0.035322296 0.039514306  
0.054815691 0.358702521 0.069942274 0.063994875  
rs10828911:18843358:G:A ENSG00000240291  
rs74222044:18844014:T:C:ENSG00000240291 0.035322296 0.039514306  
0.054815691 0.36680942 0.069942274 0.063994875  
rs74222044:18844014:T:C ENSG00000240291  
rs114959619:18846760:G:C:ENSG00000240291 0.169284753 0.039514306  
0.054815691 0.408307051 0.069942274 0.063994875  
rs114959619:18846760:G:C ENSG00000240291  
rs12569487:18847584:G:A:ENSG00000240291 0.035322296 0.039514306  
0.054815691 0.358702521 0.069942274 0.063994875  
rs12569487:18847584:G:A ENSG00000240291  
rs12570792:18847594:A:C:ENSG00000240291 0.035322296 0.039514306  
0.054815691 0.358702521 0.069942274 0.063994875  
rs12570792:18847594:A:C ENSG00000240291  
rs12570360:18847625:C:A:ENSG00000240291 0.081933656 0.039514306  
0.054815691 0.463396258 0.340307796 0.063994875  
rs12570360:18847625:C:A ENSG00000240291  
rs146947043:18848737:GGAAAAGA:G:ENSG00000240291 0.100009087  
0.039514306 0.054815691 0.435112224 0.340307796 0.063994875  
rs146947043:18848737:GGAAAAGA:G ENSG00000240291  
rs12572024:18850072:T:G:ENSG00000240291 0.25732594 0.039514306 0.14398786  
0.486971863 0.173591669 0.063994875 rs12572024:18850072:T:G  
ENSG00000240291  
rs12572034:18850126:T:C:ENSG00000240291 0.169284753 0.039514306  
0.054815691 0.408307051 0.069942274 0.063994875  
rs12572034:18850126:T:C ENSG00000240291  
rs201439618:18850488:T:C:ENSG00000240291 0.155490932 0.039514306  
0.054815691 0.408307051 0.069942274 0.063994875  
rs201439618:18850488:T:C ENSG00000240291  
rs114608102:18850968:G:C:ENSG00000240291 0.035322296 0.039514306  
0.054815691 0.358702521 0.069942274 0.063994875  
rs114608102:18850968:G:C ENSG00000240291  
rs114496140:18851090:T:C:ENSG00000240291 0.035322296 0.039514306  
0.054815691 0.358702521 0.069942274 0.063994875  
rs114496140:18851090:T:C ENSG00000240291  
rs115118258:18853252:T:A:ENSG00000240291 0.035322296 0.039514306  
0.054815691 0.358702521 0.069942274 0.063994875  
rs115118258:18853252:T:A ENSG00000240291  
rs146562610:18853702:TTCCATTC:T:ENSG00000240291 0.035322296  
0.039514306 0.054815691 0.385352708 0.069942274 0.063994875  
rs146562610:18853702:TTCCATTC:T ENSG00000240291  
rs115680692:18854517:C:T:ENSG00000240291 0.169284753 0.039514306  
0.054815691 0.408307051 0.069942274 0.063994875  
rs115680692:18854517:C:T ENSG00000240291  
rs139710192:18854695:C:T:ENSG00000240291 0.100009087 0.039514306  
0.054815691 0.435112224 0.347424829 0.108665807  
rs139710192:18854695:C:T ENSG00000240291  
rs113540872:18854833:G:C:ENSG00000240291 0.100009087 0.039514306  
0.054815691 0.432896498 0.371793022 0.108665807  
rs113540872:18854833:G:C ENSG00000240291

rs62634837:18854881:T:C:ENSG00000240291 0.25732594 0.039514306 0.14398786  
0.486971863 0.173591669 0.063994875 rs62634837:18854881:T:C  
ENSG00000240291

rs62634838:18854884:C:T:ENSG00000240291 0.25732594 0.039514306 0.14398786  
0.484670506 0.173591669 0.063994875 rs62634838:18854884:C:T  
ENSG00000240291

rs115756107:18855334:T:C:ENSG00000240291 0.035322296 0.039514306  
0.054815691 0.358702521 0.069942274 0.063994875  
rs115756107:18855334:T:C ENSG00000240291

rs139562227:18858258:T:C:ENSG00000240291 0.100009087 0.039514306  
0.054815691 0.435112224 0.347424829 0.108665807  
rs139562227:18858258:T:C ENSG00000240291

rs62634840:18859087:A:C:ENSG00000240291 0.100009087 0.039514306  
0.054815691 0.435112224 0.347424829 0.108665807  
rs62634840:18859087:A:C ENSG00000240291

rs7079325:18860469:T:C:ENSG00000240291 0.100009087 0.039514306  
0.054815691 0.435112224 0.347424829 0.108665807  
rs7079325:18860469:T:C ENSG00000240291

rs62636218:18862244:T:A:ENSG00000240291 0.035322296 0.039514306  
0.054815691 0.358702521 0.069942274 0.063994875  
rs62636218:18862244:T:A ENSG00000240291

rs57579336:18862380:T:C:ENSG00000240291 0.035322296 0.039514306  
0.054815691 0.358702521 0.069942274 0.063994875  
rs57579336:18862380:T:C ENSG00000240291

rs4748488:18862728:G:A:ENSG00000240291 0.035322296 0.039514306  
0.054815691 0.165229468 0.069942274 0.063994875  
rs4748488:18862728:G:A ENSG00000240291

rs7077722:18865962:A:G:ENSG00000240291 0.035322296 0.039514306  
0.054815691 0.358702521 0.069942274 0.063994875  
rs7077722:18865962:A:G ENSG00000240291

rs4748492:18866104:T:C:ENSG00000240291 0.035322296 0.039514306  
0.054815691 0.358702521 0.069942274 0.063994875  
rs4748492:18866104:T:C ENSG00000240291

rs6482533:18867838:C:T:ENSG00000240291 0.100009087 0.039514306  
0.054815691 0.37163762 0.069942274 0.063994875  
rs6482533:18867838:C:T ENSG00000240291

rs7895784:18872872:C:T:ENSG00000240291 0.442515926 0.039514306  
0.283332252 0.558498626 0.266901314 0.063994875  
rs7895784:18872872:C:T ENSG00000240291

rs56410858:18875337:C:G:ENSG00000240291 0.401149097 0.039514306  
0.054815691 0.524793443 0.069942274 0.063994875  
rs56410858:18875337:C:G ENSG00000240291

rs10764600:18878334:G:A:ENSG00000240291 0.100009087 0.039514306  
0.054815691 0.435112224 0.340307796 0.063994875  
rs10764600:18878334:G:A ENSG00000240291

rs10828965:18878881:T:C:ENSG00000240291 0.035322296 0.039514306  
0.054815691 0.358702521 0.069942274 0.063994875  
rs10828965:18878881:T:C ENSG00000240291

rs11525266:18879183:T:C:ENSG00000240291 0.100009087 0.039514306  
0.054815691 0.435112224 0.340307796 0.063994875  
rs11525266:18879183:T:C ENSG00000240291

rs7904263:18880525:C:A:ENSG00000240291 0.100009087 0.039514306  
0.054815691 0.435112224 0.347424829 0.108665807  
rs7904263:18880525:C:A ENSG00000240291

rs10828967:18882432:G:T:ENSG00000240291 0.442515926 0.039514306  
0.283332252 0.558498626 0.266901314 0.063994875  
rs10828967:18882432:G:T ENSG00000240291  
rs72787963:18883224:A:G:ENSG00000240291 0.100009087 0.039514306  
0.054815691 0.435112224 0.347424829 0.108665807  
rs72787963:18883224:A:G ENSG00000240291  
rs111421894:18883370:G:T:ENSG00000240291 0.035322296 0.039514306  
0.054815691 0.395341642 0.069942274 0.063994875  
rs111421894:18883370:G:T ENSG00000240291  
rs10764601:18883614:G:A:ENSG00000240291 0.100009087 0.039514306  
0.054815691 0.435112224 0.340307796 0.063994875  
rs10764601:18883614:G:A ENSG00000240291  
rs10764602:18883858:G:C:ENSG00000240291 0.436562781 0.039514306  
0.310525978 0.558498626 0.279727316 0.063994875  
rs10764602:18883858:G:C ENSG00000240291  
rs10764603:18883867:T:C:ENSG00000240291 0.060909118 0.039514306  
0.054815691 0.408307051 0.251839208 0.108665807  
rs10764603:18883867:T:C ENSG00000240291  
rs10764604:18883940:C:T:ENSG00000240291 0.401149097 0.039514306  
0.054815691 0.524793443 0.069942274 0.063994875  
rs10764604:18883940:C:T ENSG00000240291  
rs10764605:18884543:T:C:ENSG00000240291 0.408481727 0.039514306  
0.054815691 0.524793443 0.069942274 0.063994875  
rs10764605:18884543:T:C ENSG00000240291  
rs11015048:18885887:G:C:ENSG00000240291 0.100009087 0.039514306  
0.054815691 0.435112224 0.347424829 0.108665807  
rs11015048:18885887:G:C ENSG00000240291  
rs10828975:ENSG00000240291 0.100009087 0.039514306 0.054815691  
0.432896498 0.347424829 0.108665807 rs10828975 ENSG00000240291  
rs7894016:18887709:T:G:ENSG00000240291 0.035322296 0.039514306  
0.054815691 0.358702521 0.069942274 0.063994875  
rs7894016:18887709:T:G ENSG00000240291  
rs11015077:18889744:C:A:ENSG00000240291 0.100009087 0.039514306  
0.054815691 0.491850645 0.355219989 0.063994875  
rs11015077:18889744:C:A ENSG00000240291  
rs113131914:18892861:C:T:ENSG00000240291 0.081933656 0.039514306  
0.054815691 0.491850645 0.371793022 0.063994875  
rs113131914:18892861:C:T ENSG00000240291  
rs7477076:18893108:A:G:ENSG00000240291 0.035322296 0.039514306  
0.054815691 0.438119062 0.148497947 0.063994875  
rs7477076:18893108:A:G ENSG00000240291  
rs11015105:18893955:T:C:ENSG00000240291 0.035322296 0.039514306  
0.054815691 0.438119062 0.148497947 0.063994875  
rs11015105:18893955:T:C ENSG00000240291  
rs5022622:18895544:G:T:ENSG00000240291 0.035322296 0.039514306  
0.054815691 0.455203609 0.148497947 0.063994875  
rs5022622:18895544:G:T ENSG00000240291  
rs45587935:18897252:TTC:T:ENSG00000240291 0.100009087 0.039514306  
0.054815691 0.491850645 0.388754065 0.063994875  
rs45587935:18897252:TTC:T ENSG00000240291  
rs10764625:18898434:T:C:ENSG00000240291 0.035322296 0.039514306  
0.054815691 0.445043357 0.148497947 0.063994875  
rs10764625:18898434:T:C ENSG00000240291

rs7101133:18900130:T:A:ENSG00000240291 0.060909118 0.039514306  
0.054815691 0.5834429 0.493250562 0.108665807  
rs7101133:18900130:T:A ENSG00000240291  
rs7101134:18900131:T:A:ENSG00000240291 0.035322296 0.039514306  
0.054815691 0.560086389 0.438540244 0.063994875  
rs7101134:18900131:T:A ENSG00000240291  
rs10829022:18905733:T:C:ENSG00000240291 0.146968287 0.039514306  
0.054815691 0.491850645 0.480692872 0.063994875  
rs10829022:18905733:T:C ENSG00000240291  
rs7100880:18906507:A:G:ENSG00000240291 0.485584445 0.039514306  
0.269469279 0.558498626 0.288162171 0.063994875  
rs7100880:18906507:A:G ENSG00000240291  
rs200718872:18909038:A:G:ENSG00000240291 0.155490932 0.039514306  
0.054815691 0.489772876 0.279727316 0.063994875  
rs200718872:18909038:A:G ENSG00000240291  
rs11015196:18913344:C:G:ENSG00000240291 0.162871942 0.039514306  
0.054815691 0.491850645 0.279727316 0.063994875  
rs11015196:18913344:C:G ENSG00000240291  
rs10829037:18914719:C:T:ENSG00000240291 0.452814686 0.039514306  
0.255451763 0.585024711 0.504458419 0.369977602  
rs10829037:18914719:C:T ENSG00000240291  
rs10829039:18915159:T:C:ENSG00000240291 0.169284753 0.039514306  
0.054815691 0.491850645 0.288162171 0.063994875  
rs10829039:18915159:T:C ENSG00000240291  
rs10741115:18915307:C:T:ENSG00000240291 0.169284753 0.039514306  
0.054815691 0.491850645 0.288162171 0.063994875  
rs10741115:18915307:C:T ENSG00000240291  
rs10734063:18915760:T:C:ENSG00000240291 0.169284753 0.039514306  
0.054815691 0.491850645 0.288162171 0.063994875  
rs10734063:18915760:T:C ENSG00000240291  
rs10829040:18917047:C:T:ENSG00000240291 0.452814686 0.039514306  
0.269469279 0.588441466 0.504458419 0.369977602  
rs10829040:18917047:C:T ENSG00000240291  
rs7903605:18918432:G:A:ENSG00000240291 0.175415731 0.039514306  
0.054815691 0.491850645 0.279727316 0.063994875  
rs7903605:18918432:G:A ENSG00000240291  
rs7897787:18921314:C:A:ENSG00000240291 0.18193752 0.039514306  
0.054815691 0.496527133 0.279727316 0.063994875  
rs7897787:18921314:C:A ENSG00000240291  
rs11015255:18924789:A:T:ENSG00000240291 0.25732594 0.039514306 0.14398786  
0.546358114 0.420268827 0.174366738 rs11015255:18924789:A:T  
ENSG00000240291  
rs10829060:18928169:A:T:ENSG00000240291 0.175415731 0.039514306  
0.054815691 0.491850645 0.288162171 0.063994875  
rs10829060:18928169:A:T ENSG00000240291  
rs12219183:18929138:G:T:ENSG00000240291 0.175415731 0.039514306  
0.054815691 0.491850645 0.279727316 0.063994875  
rs12219183:18929138:G:T ENSG00000240291  
rs7081977:18930918:T:C:ENSG00000240291 0.25732594 0.039514306 0.14398786  
0.528521718 0.388754065 0.174366738 rs7081977:18930918:T:C  
ENSG00000240291  
rs10829070:18932306:G:A:ENSG00000240291 0.458751695 0.039514306  
0.283332252 0.595546163 0.498016841 0.347302535  
rs10829070:18932306:G:A ENSG00000240291

rs11015312:18932953:G:A:ENSG00000240291 0.25732594 0.039514306 0.14398786  
0.528521718 0.388754065 0.174366738 rs11015312:18932953:G:A  
ENSG00000240291

rs7081690:18933661:C:T:ENSG00000240291 0.169284753 0.039514306  
0.054815691 0.486971863 0.279727316 0.063994875  
rs7081690:18933661:C:T ENSG00000240291

rs12359758:18935116:T:G:ENSG00000240291 0.25732594 0.039514306 0.14398786  
0.528521718 0.381322091 0.174366738 rs12359758:18935116:T:G  
ENSG00000240291

rs7099260:18935341:C:A:ENSG00000240291 0.304041304 0.039514306  
0.238368074 0.558498626 0.538368464 0.295623551  
rs7099260:18935341:C:A ENSG00000240291

rs57066269:18936646:A:C:ENSG00000240291 0.169284753 0.039514306  
0.054815691 0.491850645 0.266901314 0.063994875  
rs57066269:18936646:A:C ENSG00000240291

rs3740102:18940157:C:A:ENSG00000240291 0.409709915 0.039514306  
0.054815691 0.558498626 0.363699827 0.063994875  
rs3740102:18940157:C:A ENSG00000240291

rs7898781:18943773:C:T:ENSG00000240291 0.282721177 0.039514306  
0.090437058 0.558498626 0.490050927 0.108665807  
rs7898781:18943773:C:T ENSG00000240291

rs7899017:18943906:C:A:ENSG00000240291 0.271758927 0.039514306 0.14398786  
0.524793443 0.455878819 0.108665807 rs7899017:18943906:C:A  
ENSG00000240291

rs11015421:18946745:G:C:ENSG00000240291 0.248591073 0.039514306 0.14398786  
0.517229412 0.381322091 0.140342165 rs11015421:18946745:G:C  
ENSG00000240291

rs10829148:18947476:T:G:ENSG00000240291 0.339455396 0.039514306  
0.370396184 0.678782234 0.70749687 0.174366738  
rs10829148:18947476:T:G ENSG00000240291

rs10829151:18948841:C:T:ENSG00000240291 0.268135474 0.039514306  
0.090437058 0.513724482 0.420268827 0.063994875  
rs10829151:18948841:C:T ENSG00000240291

rs10764666:18956643:T:C:ENSG00000240291 0.239371492 0.039514306  
0.090437058 0.493098162 0.218559406 0.063994875  
rs10764666:18956643:T:C ENSG00000240291

rs10741127:18957647:T:G:ENSG00000240291 0.569751485 0.039514306  
0.269469279 0.637390127 0.54593522 0.487204938  
rs10741127:18957647:T:G ENSG00000240291

rs34839131:18957752:GC:G:ENSG00000240291 0.25732594 0.039514306  
0.14398786 0.519043541 0.371793022 0.140342165  
rs34839131:18957752:GC:G ENSG00000240291

rs6482597:18964840:A:G:ENSG00000240291 0.200359533 0.039514306  
0.054815691 0.244282474 0.069942274 0.063994875  
rs6482597:18964840:A:G ENSG00000240291

rs1055116:18966867:T:C:ENSG00000240291 0.271758927 0.039514306  
0.165546404 0.37163762 0.279727316 0.063994875  
rs1055116:18966867:T:C ENSG00000240291

rs10741129:18966907:A:G:ENSG00000240291 0.219347314 0.039514306  
0.054815691 0.37163762 0.173591669 0.063994875  
rs10741129:18966907:A:G ENSG00000240291

rs6481523:ENSG00000254635 0.146968287 0.039514306 0.820914955  
0.072575018 0.905940899 0.140342165 rs6481523 ENSG00000254635



rs1780222:28936504:A:G:ENSG00000254635 0.035322296 0.40461139  
0.419451892 0.072575018 0.069942274 0.063994875  
rs1780222:28936504:A:G:ENSG00000254635  
rs72785266:43891533:G:C:ENSG00000230555 0.035322296 0.602503447  
0.618696386 0.072575018 0.069942274 0.063994875  
rs72785266:43891533:G:C:ENSG00000230555  
rs11006097:ENSG00000122873 0.200359533 0.039514306 0.828327833  
0.442167795 0.87814657 0.813853703 rs11006097:ENSG00000122873  
rs56824308:60053288:AG:A:ENSG00000122873 0.215796307 0.039514306  
0.828327833 0.450346002 0.886719814 0.818631709  
rs56824308:60053288:AG:A:ENSG00000122873  
rs3002286:213110429:G:A:ENSG00000143494 0.035322296 0.668532818  
0.568513848 0.714739375 0.90539517 0.783188262  
rs3002286:213110429:G:A:ENSG00000143494  
rs2453237:221028584:G:A:ENSG00000272823 0.34585993 0.039514306  
0.579532834 0.700879541 0.9305498 0.817686609  
rs2453237:221028584:G:A:ENSG00000272823  
rs2807854:ENSG00000272823 0.342246666 0.039514306 0.581240934  
0.697988141 0.9305498 0.822986502 rs2807854:ENSG00000272823  
rs2807855:221031307:G:A:ENSG00000272823 0.342246666 0.039514306  
0.580001614 0.699000273 0.9305498 0.822016603  
rs2807855:221031307:G:A:ENSG00000272823  
rs2784259:221032324:A:T:ENSG00000272823 0.343380618 0.039514306  
0.580001614 0.699000273 0.9305498 0.821768383  
rs2784259:221032324:A:T:ENSG00000272823  
rs2784258:221032491:C:T:ENSG00000272823 0.35484344 0.039514306  
0.571157005 0.712954796 0.9305498 0.813853703  
rs2784258:221032491:C:T:ENSG00000272823  
rs2491258:221033754:A:G:ENSG00000272823 0.34585993 0.039514306  
0.578118442 0.700879541 0.9305498 0.813853703  
rs2491258:221033754:A:G:ENSG00000272823  
rs2264400:221035680:T:C:ENSG00000272823 0.343380618 0.039514306  
0.579532834 0.699000273 0.9305498 0.819500231  
rs2264400:221035680:T:C:ENSG00000272823  
rs2784260:221037157:T:C:ENSG00000272823 0.35010809 0.039514306  
0.579532834 0.703384182 0.9305498 0.813853703  
rs2784260:221037157:T:C:ENSG00000272823  
rs2807871:221040034:G:A:ENSG00000272823 0.347231053 0.039514306  
0.572955873 0.700879541 0.9305498 0.813853703  
rs2807871:221040034:G:A:ENSG00000272823  
rs2784247:221040987:T:A:ENSG00000272823 0.344174629 0.039514306  
0.576180386 0.699000273 0.9305498 0.814013767  
rs2784247:221040987:T:A:ENSG00000272823  
rs2642447:221042293:T:G:ENSG00000272823 0.349088436 0.039514306 0.57027753  
0.700879541 0.928791234 0.813853703 rs2642447:221042293:T:G  
ENSG00000272823  
rs10664325:221043354:A:AGTTTT:ENSG00000272823 0.351885919 0.039514306  
0.568513848 0.699000273 0.925113964 0.813853703  
rs10664325:221043354:A:AGTTTT:ENSG00000272823  
rs5011752:221044762:G:A:ENSG00000272823 0.347231053 0.039514306  
0.568513848 0.703018054 0.921191025 0.813853703  
rs5011752:221044762:G:A:ENSG00000272823  
rs147672552:221044820:T:TTGAAAATAACACAGTGAACACAG:ENSG00000272823  
0.343365679 0.039514306 0.571157005 0.699249305 0.922636253

0.813853703 rs147672552:221044820:T:TTGAAAATAACACAGTGAACACAG  
ENSG00000272823  
rs1970506:93428286:C:T:ENSG00000228701 0.572296739 0.039514306  
0.121437838 0.558498626 0.846349625 0.842355515  
rs1970506:93428286:C:T ENSG00000228701  
rs59651880:93429816:A:ATAAC:ENSG00000228701 0.407773261 0.039514306  
0.090437058 0.358702521 0.904520929 0.780608344  
rs59651880:93429816:A:ATAAC ENSG00000228701  
rs4919686:104592249:A:C:ENSG00000166275 0.571907775 0.039514306  
0.831423382 0.704092316 0.599377315 0.813853703  
rs4919686:104592249:A:C ENSG00000166275  
rs12775431:104611764:A:C:ENSG00000166275 0.035322296 0.33968813  
0.565079872 0.685348652 0.9305498 0.319318857  
rs12775431:104611764:A:C ENSG00000166275  
rs11441374:104619292:A:AC:ENSG00000166275 0.035322296 0.346656012  
0.565079872 0.685348652 0.9305498 0.319318857  
rs11441374:104619292:A:AC ENSG00000166275  
rs9527:104623578:C:T:ENSG00000166275 0.035322296 0.346656012  
0.565079872 0.685348652 0.9305498 0.319318857 rs9527:104623578:C:T  
ENSG00000166275  
rs4757468:17001934:C:T:ENSG00000166689 0.035322296 0.066642396  
0.054815691 0.072575018 0.288162171 0.063994875  
rs4757468:17001934:C:T ENSG00000166689  
rs6486332:17003732:G:C:ENSG00000166689 0.035322296 0.089622533  
0.054815691 0.072575018 0.347424829 0.063994875  
rs6486332:17003732:G:C ENSG00000166689  
rs4757470:ENSG00000166689 0.035322296 0.066642396 0.054815691  
0.072575018 0.288162171 0.063994875 rs4757470 ENSG00000166689  
rs4237715:17004189:C:T:ENSG00000166689 0.035322296 0.039514306  
0.054815691 0.072575018 0.069942274 0.063994875  
rs4237715:17004189:C:T ENSG00000166689  
rs2353369:17007220:A:G:ENSG00000166689 0.035322296 0.039514306  
0.054815691 0.072575018 0.410008196 0.063994875  
rs2353369:17007220:A:G ENSG00000166689  
rs10832709:17008644:C:A:ENSG00000166689 0.035322296 0.039514306  
0.054815691 0.072575018 0.532319281 0.063994875  
rs10832709:17008644:C:A ENSG00000166689  
rs5789966:17010210:G:GTC:ENSG00000166689 0.035322296 0.039514306  
0.054815691 0.072575018 0.069942274 0.063994875  
rs5789966:17010210:G:GTC ENSG00000166689  
rs6486333:17010672:G:A:ENSG00000166689 0.035322296 0.039514306  
0.054815691 0.072575018 0.512857075 0.063994875  
rs6486333:17010672:G:A ENSG00000166689  
rs4757472:17010922:G:A:ENSG00000166689 0.035322296 0.089622533  
0.054815691 0.072575018 0.544223189 0.063994875  
rs4757472:17010922:G:A ENSG00000166689  
rs10766367:17013152:A:G:ENSG00000166689 0.035322296 0.110495165  
0.054815691 0.072575018 0.650850274 0.063994875  
rs10766367:17013152:A:G ENSG00000166689  
rs4757474:17013974:T:C:ENSG00000166689 0.035322296 0.066642396  
0.054815691 0.072575018 0.54593522 0.063994875  
rs4757474:17013974:T:C ENSG00000166689

rs10610034:17014302:CAA:C:ENSG00000166689 0.035322296 0.039514306  
0.054815691 0.072575018 0.54593522 0.063994875  
rs10610034:17014302:CAA:C ENSG00000166689  
rs6486334:17015557:T:C:ENSG00000166689 0.035322296 0.039514306  
0.054815691 0.072575018 0.54593522 0.063994875  
rs6486334:17015557:T:C ENSG00000166689  
rs6486335:17015751:T:C:ENSG00000166689 0.035322296 0.209793344  
0.054815691 0.072575018 0.608245709 0.063994875  
rs6486335:17015751:T:C ENSG00000166689  
rs7934567:17015849:T:C:ENSG00000166689 0.035322296 0.110495165  
0.054815691 0.072575018 0.484480155 0.063994875  
rs7934567:17015849:T:C ENSG00000166689  
rs7944490:17015893:G:A:ENSG00000166689 0.035322296 0.3227674  
0.054815691 0.072575018 0.538368464 0.063994875  
rs7944490:17015893:G:A ENSG00000166689  
rs7937479:17015954:T:C:ENSG00000166689 0.035322296 0.066642396  
0.054815691 0.072575018 0.410008196 0.063994875  
rs7937479:17015954:T:C ENSG00000166689  
rs4757475:17016416:A:G:ENSG00000166689 0.035322296 0.110495165  
0.054815691 0.072575018 0.647818531 0.063994875  
rs4757475:17016416:A:G ENSG00000166689  
rs10832712:17017080:T:C:ENSG00000166689 0.035322296 0.039514306  
0.054815691 0.072575018 0.218559406 0.063994875  
rs10832712:17017080:T:C ENSG00000166689  
rs2302207:17017622:C:T:ENSG00000166689 0.035322296 0.110495165  
0.054815691 0.072575018 0.647818531 0.063994875  
rs2302207:17017622:C:T ENSG00000166689  
rs10832713:17018877:T:C:ENSG00000166689 0.035322296 0.039514306  
0.054815691 0.072575018 0.173591669 0.063994875  
rs10832713:17018877:T:C ENSG00000166689  
rs5789967:17020389:GA:G:ENSG00000166689 0.035322296 0.110495165  
0.054815691 0.072575018 0.647818531 0.063994875  
rs5789967:17020389:GA:G ENSG00000166689  
rs4757479:17021663:C:A:ENSG00000166689 0.035322296 0.039514306  
0.054815691 0.072575018 0.069942274 0.063994875  
rs4757479:17021663:C:A ENSG00000166689  
rs7940499:17022030:T:C:ENSG00000166689 0.035322296 0.209793344  
0.054815691 0.072575018 0.614364441 0.063994875  
rs7940499:17022030:T:C ENSG00000166689  
rs1468489:17022894:T:C:ENSG00000166689 0.035322296 0.066642396  
0.054815691 0.072575018 0.480692872 0.063994875  
rs1468489:17022894:T:C ENSG00000166689  
rs7930890:17024699:G:A:ENSG00000166689 0.035322296 0.219098289  
0.054815691 0.072575018 0.617728871 0.063994875  
rs7930890:17024699:G:A ENSG00000166689  
rs7931025:17024847:G:A:ENSG00000166689 0.035322296 0.202241296  
0.054815691 0.072575018 0.603364769 0.063994875  
rs7931025:17024847:G:A ENSG00000166689  
rs4757482:17025675:A:G:ENSG00000166689 0.035322296 0.039514306  
0.054815691 0.072575018 0.173591669 0.063994875  
rs4757482:17025675:A:G ENSG00000166689  
rs4757483:17025712:G:A:ENSG00000166689 0.035322296 0.53025993  
0.054815691 0.197042097 0.752490742 0.374953256  
rs4757483:17025712:G:A ENSG00000166689

rs4757484:ENSG00000166689 0.035322296 0.039514306 0.054815691  
0.072575018 0.173591669 0.063994875 rs4757484 ENSG00000166689  
rs4756882:17026073:G:A:ENSG00000166689 0.035322296 0.145249232  
0.054815691 0.072575018 0.532319281 0.063994875  
rs4756882:17026073:G:A ENSG00000166689  
rs7928955:17026639:T:C:ENSG00000166689 0.035322296 0.174910011  
0.054815691 0.072575018 0.477032507 0.063994875  
rs7928955:17026639:T:C ENSG00000166689  
rs11297032:17026666:CG:C:ENSG00000166689 0.035322296 0.33968813  
0.054815691 0.072575018 0.608245709 0.174366738  
rs11297032:17026666:CG:C ENSG00000166689  
rs76970011:17026668:G:A:ENSG00000166689 0.035322296 0.33968813  
0.054815691 0.072575018 0.608245709 0.174366738  
rs76970011:17026668:G:A ENSG00000166689  
rs7926143:17026854:A:G:ENSG00000166689 0.035322296 0.110495165  
0.054815691 0.072575018 0.403448628 0.063994875  
rs7926143:17026854:A:G ENSG00000166689  
rs11394581:17026873:G:GT:ENSG00000166689 0.035322296 0.424214053  
0.054815691 0.072575018 0.644255189 0.295623551  
rs11394581:17026873:G:GT ENSG00000166689  
rs10741719:17027329:G:A:ENSG00000166689 0.035322296 0.305849216  
0.054815691 0.072575018 0.550609082 0.140342165  
rs10741719:17027329:G:A ENSG00000166689  
rs10741720:17027429:T:C:ENSG00000166689 0.035322296 0.202241296  
0.054815691 0.072575018 0.512857075 0.063994875  
rs10741720:17027429:T:C ENSG00000166689  
rs10741721:17027653:C:T:ENSG00000166689 0.035322296 0.229789644  
0.054815691 0.072575018 0.490050927 0.063994875  
rs10741721:17027653:C:T ENSG00000166689  
rs4757485:17027688:C:A:ENSG00000166689 0.035322296 0.229789644  
0.054815691 0.072575018 0.498016841 0.063994875  
rs4757485:17027688:C:A ENSG00000166689  
rs4757486:17027805:G:A:ENSG00000166689 0.035322296 0.209793344  
0.054815691 0.072575018 0.467095788 0.140342165  
rs4757486:17027805:G:A ENSG00000166689  
rs10832715:17028003:A:G:ENSG00000166689 0.035322296 0.311964405  
0.054815691 0.072575018 0.559581427 0.201281701  
rs10832715:17028003:A:G ENSG00000166689  
rs35511252:17028019:CA:C:ENSG00000166689 0.035322296 0.311964405  
0.054815691 0.072575018 0.57001038 0.174366738  
rs35511252:17028019:CA:C ENSG00000166689  
rs10832716:17028070:G:A:ENSG00000166689 0.035322296 0.290843861  
0.054815691 0.072575018 0.538368464 0.174366738  
rs10832716:17028070:G:A ENSG00000166689  
rs59063580:17028173:C:CA:ENSG00000166689 0.035322296 0.396207958  
0.054815691 0.072575018 0.66458282 0.347302535  
rs59063580:17028173:C:CA ENSG00000166689  
rs57677839:17028189:G:A:ENSG00000166689 0.035322296 0.248891879  
0.054815691 0.072575018 0.460100455 0.063994875  
rs57677839:17028189:G:A ENSG00000166689  
rs7947297:17028328:C:T:ENSG00000166689 0.035322296 0.33968813  
0.054815691 0.072575018 0.580298595 0.174366738  
rs7947297:17028328:C:T ENSG00000166689

rs7933984:17028745:A:G:ENSG00000166689 0.035322296 0.297824828  
0.054815691 0.072575018 0.54593522 0.063994875  
rs7933984:17028745:A:G ENSG00000166689  
rs7947897:17028820:C:T:ENSG00000166689 0.035322296 0.500746138  
0.054815691 0.072575018 0.693223878 0.295623551  
rs7947897:17028820:C:T ENSG00000166689  
rs10832717:17029099:C:T:ENSG00000166689 0.035322296 0.229789644  
0.054815691 0.072575018 0.54593522 0.063994875  
rs10832717:17029099:C:T ENSG00000166689  
rs10832718:17029107:G:T:ENSG00000166689 0.035322296 0.174910011  
0.054815691 0.072575018 0.519536868 0.063994875  
rs10832718:17029107:G:T ENSG00000166689  
rs10832719:17029152:A:G:ENSG00000166689 0.035322296 0.174910011  
0.054815691 0.072575018 0.519536868 0.063994875  
rs10832719:17029152:A:G ENSG00000166689  
rs10832720:17029262:G:A:ENSG00000166689 0.035322296 0.229789644  
0.054815691 0.072575018 0.54593522 0.063994875  
rs10832720:17029262:G:A ENSG00000166689  
rs12288625:17029413:C:G:ENSG00000166689 0.035322296 0.229789644  
0.054815691 0.072575018 0.519536868 0.063994875  
rs12288625:17029413:C:G ENSG00000166689  
rs10832721:17029648:A:C:ENSG00000166689 0.035322296 0.297824828  
0.054815691 0.072575018 0.54593522 0.063994875  
rs10832721:17029648:A:C ENSG00000166689  
rs10766370:17029825:T:G:ENSG00000166689 0.035322296 0.297824828  
0.054815691 0.072575018 0.54593522 0.063994875  
rs10766370:17029825:T:G ENSG00000166689  
rs4562807:17029941:T:C:ENSG00000166689 0.035322296 0.311964405  
0.054815691 0.072575018 0.580298595 0.063994875  
rs4562807:17029941:T:C ENSG00000166689  
rs4756883:17030101:C:A:ENSG00000166689 0.035322296 0.229789644  
0.054815691 0.072575018 0.519536868 0.063994875  
rs4756883:17030101:C:A ENSG00000166689  
rs10766371:17030500:C:T:ENSG00000166689 0.035322296 0.297824828  
0.054815691 0.072575018 0.54593522 0.063994875  
rs10766371:17030500:C:T ENSG00000166689  
rs4757487:17030553:G:A:ENSG00000166689 0.035322296 0.229789644  
0.054815691 0.072575018 0.519536868 0.063994875  
rs4757487:17030553:G:A ENSG00000166689  
rs4757488:17030617:A:G:ENSG00000166689 0.035322296 0.297824828  
0.054815691 0.072575018 0.54593522 0.063994875  
rs4757488:17030617:A:G ENSG00000166689  
rs4757489:17030660:T:G:ENSG00000166689 0.035322296 0.229789644  
0.054815691 0.072575018 0.519536868 0.063994875  
rs4757489:17030660:T:G ENSG00000166689  
rs4757490:17030775:T:C:ENSG00000166689 0.035322296 0.297824828  
0.054815691 0.072575018 0.54593522 0.063994875  
rs4757490:17030775:T:C ENSG00000166689  
rs10766372:17031276:G:A:ENSG00000166689 0.035322296 0.305849216  
0.054815691 0.072575018 0.54593522 0.063994875  
rs10766372:17031276:G:A ENSG00000166689  
rs12365483:17031650:C:T:ENSG00000166689 0.035322296 0.316996396  
0.054815691 0.072575018 0.54593522 0.063994875  
rs12365483:17031650:C:T ENSG00000166689

rs6486339:17034875:C:A:ENSG00000166689 0.035322296 0.40461139  
0.054815691 0.072575018 0.550609082 0.063994875  
rs6486339:17034875:C:A ENSG00000166689  
rs6486340:17035064:G:A:ENSG00000166689 0.035322296 0.40461139  
0.054815691 0.072575018 0.550609082 0.063994875  
rs6486340:17035064:G:A ENSG00000166689  
rs6486341:17035086:G:A:ENSG00000166689 0.035322296 0.42813865  
0.054815691 0.072575018 0.608245709 0.063994875  
rs6486341:17035086:G:A ENSG00000166689  
rs6486342:17035119:C:G:ENSG00000166689 0.035322296 0.40461139  
0.054815691 0.072575018 0.550609082 0.063994875  
rs6486342:17035119:C:G ENSG00000166689  
rs6486343:17035251:G:T:ENSG00000166689 0.035322296 0.367821565  
0.054815691 0.072575018 0.54593522 0.063994875  
rs6486343:17035251:G:T ENSG00000166689  
rs6486344:17035314:C:T:ENSG00000166689 0.035322296 0.407321946  
0.054815691 0.072575018 0.555947116 0.063994875  
rs6486344:17035314:C:T ENSG00000166689  
rs61881311:17035718:A:G:ENSG00000166689 0.035322296 0.38687185  
0.054815691 0.072575018 0.54593522 0.063994875  
rs61881311:17035718:A:G ENSG00000166689  
rs75533032:17036091:G:C:ENSG00000166689 0.035322296 0.396207958  
0.054815691 0.072575018 0.54593522 0.063994875  
rs75533032:17036091:G:C ENSG00000166689  
rs35115039:17036157:A:G:ENSG00000166689 0.035322296 0.396207958  
0.054815691 0.072575018 0.54593522 0.063994875  
rs35115039:17036157:A:G ENSG00000166689  
rs34986803:17036180:A:C:ENSG00000166689 0.035322296 0.53025993  
0.054815691 0.072575018 0.690981753 0.063994875  
rs34986803:17036180:A:C ENSG00000166689  
rs6484746:ENSG00000149089 0.146968287 0.039514306 0.33856507  
0.072575018 0.237095457 0.525367746 rs6484746 ENSG00000149089  
rs10838137:43634973:A:C:ENSG00000149084 0.035322296 0.110495165  
0.054815691 0.197042097 0.614364441 0.174366738  
rs10838137:43634973:A:C ENSG00000149084  
rs2862965:43635499:C:G:ENSG00000149084 0.035322296 0.110495165  
0.054815691 0.197042097 0.595947504 0.174366738  
rs2862965:43635499:C:G ENSG00000149084  
rs4755722:43636578:A:G:ENSG00000149084 0.035322296 0.110495165  
0.054815691 0.197042097 0.594105975 0.174366738  
rs4755722:43636578:A:G ENSG00000149084  
rs73453722:47381186:G:A:ENSG00000110536 0.081933656 0.039514306  
0.090437058 0.165229468 0.069942274 0.605346151  
rs73453722:47381186:G:A ENSG00000110536  
rs112815034:47382117:G:T:ENSG00000110536 0.155490932 0.039514306  
0.184980376 0.276782326 0.069942274 0.675892989  
rs112815034:47382117:G:T ENSG00000110536  
rs112923021:47385508:G:A:ENSG00000110536 0.155490932 0.039514306  
0.184980376 0.276782326 0.069942274 0.675892989  
rs112923021:47385508:G:A ENSG00000110536  
rs112120033:47398604:G:A:ENSG00000110536 0.155490932 0.039514306  
0.184980376 0.276782326 0.069942274 0.675892989  
rs112120033:47398604:G:A ENSG00000110536



rs116118752:47409505:A:G:ENSG00000110536 0.081933656 0.039514306  
0.090437058 0.165229468 0.069942274 0.60018511  
rs116118752:47409505:A:G ENSG00000110536  
rs73453784:47413940:C:T:ENSG00000110536 0.081933656 0.039514306  
0.090437058 0.165229468 0.069942274 0.60018511  
rs73453784:47413940:C:T ENSG00000110536  
rs58477759:47417865:A:G:ENSG00000110536 0.155490932 0.039514306  
0.184980376 0.276782326 0.069942274 0.675892989  
rs58477759:47417865:A:G ENSG00000110536  
rs112950968:47421007:G:A:ENSG00000110536 0.155490932 0.039514306  
0.184980376 0.276782326 0.069942274 0.675892989  
rs112950968:47421007:G:A ENSG00000110536  
rs73457724:47427047:T:A:ENSG00000110536 0.155490932 0.039514306  
0.184980376 0.276782326 0.069942274 0.675892989  
rs73457724:47427047:T:A ENSG00000110536  
rs73457744:47439459:G:A:ENSG00000110536 0.155490932 0.039514306  
0.184980376 0.276782326 0.069942274 0.675892989  
rs73457744:47439459:G:A ENSG00000110536  
rs73459787:47469822:G:A:ENSG00000110536 0.18193752 0.039514306  
0.283332252 0.314254491 0.069942274 0.681432383  
rs73459787:47469822:G:A ENSG00000110536  
rs73459802:47474751:T:G:ENSG00000110536 0.081933656 0.039514306  
0.090437058 0.165229468 0.069942274 0.60018511  
rs73459802:47474751:T:G ENSG00000110536  
rs73461720:47488871:A:C:ENSG00000110536 0.155490932 0.039514306  
0.184980376 0.276782326 0.069942274 0.675892989  
rs73461720:47488871:A:C ENSG00000110536  
rs73461727:47517034:A:G:ENSG00000110536 0.155490932 0.039514306  
0.184980376 0.276782326 0.069942274 0.675892989  
rs73461727:47517034:A:G ENSG00000110536  
rs112917929:47519285:G:A:ENSG00000110536 0.081933656 0.039514306  
0.090437058 0.165229468 0.069942274 0.60018511  
rs112917929:47519285:G:A ENSG00000110536  
rs113300995:47534136:C:A:ENSG00000110536 0.081933656 0.039514306  
0.090437058 0.165229468 0.069942274 0.60018511  
rs113300995:47534136:C:A ENSG00000110536  
rs73461747:47538053:G:A:ENSG00000110536 0.155490932 0.039514306  
0.184980376 0.276782326 0.069942274 0.675892989  
rs73461747:47538053:G:A ENSG00000110536  
rs112371420:47543862:G:A:ENSG00000110536 0.155490932 0.039514306  
0.184980376 0.276782326 0.069942274 0.675892989  
rs112371420:47543862:G:A ENSG00000110536  
rs113992833:47548459:T:C:ENSG00000110536 0.155490932 0.039514306  
0.184980376 0.276782326 0.069942274 0.675892989  
rs113992833:47548459:T:C ENSG00000110536  
rs73461757:47548770:A:G:ENSG00000110536 0.155490932 0.039514306  
0.184980376 0.276782326 0.069942274 0.675892989  
rs73461757:47548770:A:G ENSG00000110536  
rs140405991:47557589:T:C:ENSG00000110536 0.155490932 0.039514306  
0.184980376 0.276782326 0.069942274 0.675892989  
rs140405991:47557589:T:C ENSG00000110536  
11:47574566:C:CGCTGCCTCAGTT:ENSG00000110536 0.081933656 0.039514306  
0.090437058 0.165229468 0.069942274 0.60018511  
11:47574566:C:CGCTGCCTCAGTT ENSG00000110536

rs112096933:47597989:C:T:ENSG00000110536 0.155490932 0.039514306  
0.184980376 0.276782326 0.069942274 0.675892989  
rs112096933:47597989:C:T ENSG00000110536  
rs148232581:47628688:C:CT:ENSG00000110536 0.081933656 0.039514306  
0.090437058 0.165229468 0.069942274 0.60018511  
rs148232581:47628688:C:CT ENSG00000110536  
rs73465622:47652503:G:A:ENSG00000110536 0.155490932 0.039514306  
0.184980376 0.276782326 0.069942274 0.675892989  
rs73465622:47652503:G:A ENSG00000110536  
rs59039151:47683163:T:C:ENSG00000110536 0.155490932 0.039514306  
0.184980376 0.276782326 0.069942274 0.675892989  
rs59039151:47683163:T:C ENSG00000110536  
rs73467330:47685741:G:T:ENSG00000110536 0.081933656 0.039514306  
0.090437058 0.165229468 0.069942274 0.60018511  
rs73467330:47685741:G:T ENSG00000110536  
rs11365719:47702929:CA:C:ENSG00000110536 0.155490932 0.039514306  
0.184980376 0.276782326 0.069942274 0.675892989  
rs11365719:47702929:CA:C ENSG00000110536  
rs113307128:47729650:C:T:ENSG00000110536 0.035322296 0.039514306  
0.165546404 0.072575018 0.069942274 0.460921055  
rs113307128:47729650:C:T ENSG00000110536  
rs58238323:47733269:T:A:ENSG00000110536 0.155490932 0.039514306  
0.184980376 0.276782326 0.069942274 0.675892989  
rs58238323:47733269:T:A ENSG00000110536  
rs111315477:47749904:C:T:ENSG00000110536 0.155490932 0.039514306  
0.184980376 0.290136921 0.069942274 0.679783319  
rs111315477:47749904:C:T ENSG00000110536  
rs73453044:47784189:G:C:ENSG00000110536 0.196140407 0.039514306  
0.255451763 0.326422852 0.069942274 0.702759696  
rs73453044:47784189:G:C ENSG00000110536  
rs59413596:47788664:G:A:ENSG00000110536 0.035322296 0.039514306  
0.165546404 0.072575018 0.069942274 0.460921055  
rs59413596:47788664:G:A ENSG00000110536  
rs146543301:47794520:ATTT:A:ENSG00000110536 0.035322296 0.039514306  
0.165546404 0.072575018 0.069942274 0.460921055  
rs146543301:47794520:ATTT:A ENSG00000110536  
rs56855787:47801010:G:A:ENSG00000110536 0.132837758 0.039514306 0.14398786  
0.197042097 0.069942274 0.638312381 rs56855787:47801010:G:A  
ENSG00000110536  
rs73453067:47803941:G:A:ENSG00000110536 0.081933656 0.039514306  
0.090437058 0.165229468 0.069942274 0.60018511  
rs73453067:47803941:G:A ENSG00000110536  
rs112265615:47804371:T:C:ENSG00000110536 0.035322296 0.039514306  
0.165546404 0.072575018 0.069942274 0.460921055  
rs112265615:47804371:T:C ENSG00000110536  
rs60147425:47806206:G:A:ENSG00000110536 0.155490932 0.039514306  
0.184980376 0.276782326 0.069942274 0.675892989  
rs60147425:47806206:G:A ENSG00000110536  
rs113882783:47825237:CCT:C:ENSG00000110536 0.035322296 0.039514306  
0.165546404 0.072575018 0.069942274 0.460921055  
rs113882783:47825237:CCT:C ENSG00000110536  
rs73456941:47843430:G:A:ENSG00000110536 0.035322296 0.039514306  
0.165546404 0.072575018 0.069942274 0.460921055  
rs73456941:47843430:G:A ENSG00000110536

rs58023759:47846084:C:G:ENSG00000110536 0.035322296 0.039514306  
0.090437058 0.072575018 0.069942274 0.390568128  
rs58023759:47846084:C:G ENSG00000110536  
rs79896215:47858746:T:C:ENSG00000110536 0.035322296 0.039514306  
0.090437058 0.072575018 0.069942274 0.401203391  
rs79896215:47858746:T:C ENSG00000110536  
rs73456973:47862951:A:G:ENSG00000110536 0.035322296 0.039514306  
0.165546404 0.072575018 0.069942274 0.460921055  
rs73456973:47862951:A:G ENSG00000110536  
rs111511152:47873065:C:T:ENSG00000110536 0.155490932 0.039514306  
0.184980376 0.276782326 0.069942274 0.675892989  
rs111511152:47873065:C:T ENSG00000110536  
rs73456982:47877313:A:T:ENSG00000110536 0.035322296 0.039514306  
0.090437058 0.072575018 0.069942274 0.390568128  
rs73456982:47877313:A:T ENSG00000110536  
rs5791788:47878120:CT:C:ENSG00000110536 0.035322296 0.039514306  
0.090437058 0.072575018 0.069942274 0.358316132  
rs5791788:47878120:CT:C ENSG00000110536  
rs112474900:47883804:C:T:ENSG00000110536 0.035322296 0.039514306  
0.184980376 0.072575018 0.069942274 0.460921055  
rs112474900:47883804:C:T ENSG00000110536  
rs112631230:47898074:C:T:ENSG00000110536 0.081933656 0.039514306  
0.14398786 0.165229468 0.069942274 0.681432383  
rs112631230:47898074:C:T ENSG00000110536  
rs57197010:47898620:A:C:ENSG00000110536 0.035322296 0.039514306  
0.310525978 0.165229468 0.069942274 0.503271951  
rs57197010:47898620:A:C ENSG00000110536  
rs73458833:47902369:A:T:ENSG00000110536 0.035322296 0.039514306  
0.411358711 0.226823504 0.069942274 0.549252346  
rs73458833:47902369:A:T ENSG00000110536  
rs17880328:64950472:A:G:ENSG00000254614 0.035322296 0.189251465  
0.054815691 0.395341642 0.069942274 0.225997306  
rs17880328:64950472:A:G ENSG00000254614  
rs75366838:65789313:G:A:ENSG00000179292 0.492003181 0.039514306  
0.283332252 0.513724482 0.731325674 0.56162725  
rs75366838:65789313:G:A ENSG00000179292  
rs7101660:65799604:C:T:ENSG00000179292 0.492003181 0.039514306  
0.283332252 0.513724482 0.731325674 0.56162725  
rs7101660:65799604:C:T ENSG00000179292  
11:65799940:C:CAA:ENSG00000179292 0.492003181 0.039514306 0.283332252  
0.513724482 0.731325674 0.56162725 11:65799940:C:CAA:ENSG00000179292  
rs75773795:65800681:T:C:ENSG00000179292 0.492003181 0.039514306  
0.283332252 0.513724482 0.731325674 0.56162725  
rs75773795:65800681:T:C ENSG00000179292  
rs182689744:65801874:C:T:ENSG00000179292 0.492003181 0.039514306  
0.283332252 0.513724482 0.731325674 0.56162725  
rs182689744:65801874:C:T ENSG00000179292  
rs112223671:65805514:G:A:ENSG00000179292 0.492003181 0.039514306  
0.283332252 0.513724482 0.731325674 0.56162725  
rs112223671:65805514:G:A ENSG00000179292  
rs58480305:65807918:G:A:ENSG00000179292 0.492003181 0.039514306  
0.283332252 0.513724482 0.731325674 0.56162725  
rs58480305:65807918:G:A ENSG00000179292

rs60283362:65814531:C:T:ENSG00000179292 0.492003181 0.039514306  
0.283332252 0.513724482 0.731325674 0.56162725  
rs60283362:65814531:C:T ENSG00000179292  
rs191649368:65825371:A:G:ENSG00000179292 0.390769583 0.039514306  
0.238368074 0.491850645 0.641673925 0.525367746  
rs191649368:65825371:A:G ENSG00000179292  
rs744434:65847982:T:G:ENSG00000179292 0.407773261 0.039514306  
0.429802874 0.751091602 0.9305498 0.813853703 rs744434:65847982:T:G  
ENSG00000179292  
rs141453816:65921169:G:C:ENSG00000179292 0.408481727 0.039514306  
0.429802874 0.751091602 0.9305498 0.813853703  
rs141453816:65921169:G:C ENSG00000179292  
11:65923695:ATATATATATATATATATATATATATAT:A:ENSG00000179292 0.404030971  
0.039514306 0.458471274 0.749779235 0.773560498 0.748055982  
11:65923695:ATATATATATATATATATATATATATAT:A ENSG00000179292  
rs10488727:65928342:G:C:ENSG00000179292 0.408481727 0.039514306  
0.429802874 0.751091602 0.9305498 0.813853703  
rs10488727:65928342:G:C ENSG00000179292  
rs7935217:65947911:C:A:ENSG00000179292 0.409709915 0.039514306  
0.238368074 0.530641947 0.9305498 0.71899349  
rs7935217:65947911:C:A ENSG00000179292  
rs7935315:65947972:C:T:ENSG00000179292 0.408481727 0.039514306  
0.436932543 0.751091602 0.9305498 0.813853703  
rs7935315:65947972:C:T ENSG00000179292  
rs75048144:65951301:G:C:ENSG00000179292 0.408481727 0.039514306  
0.436932543 0.751091602 0.9305498 0.813853703  
rs75048144:65951301:G:C ENSG00000179292  
rs75050982:65952383:C:T:ENSG00000179292 0.409709915 0.039514306  
0.238368074 0.530641947 0.9305498 0.71899349  
rs75050982:65952383:C:T ENSG00000179292  
rs77268541:65957870:G:A:ENSG00000179292 0.343365679 0.039514306  
0.184980376 0.720146805 0.929846839 0.758762279  
rs77268541:65957870:G:A ENSG00000179292  
rs112631128:66163056:G:A:ENSG00000255517 0.215796307 0.039514306  
0.710954776 0.491850645 0.9305498 0.108665807  
rs112631128:66163056:G:A ENSG00000255517  
11:66176237:C:A:ENSG00000255517 0.282721177 0.039514306 0.568513848  
0.276782326 0.9305498 0.108665807 11:66176237:C:A ENSG00000255517  
rs78195441:66652024:T:C:ENSG00000255517 0.190392053 0.039514306  
0.238368074 0.458827356 0.947231409 0.063994875  
rs78195441:66652024:T:C ENSG00000255517  
rs76844511:66652340:C:G:ENSG00000255517 0.190392053 0.039514306  
0.269469279 0.472415297 0.947231409 0.063994875  
rs76844511:66652340:C:G ENSG00000255517  
rs60370841:66653201:GCCAGGCAGGACC:G:ENSG00000255517 0.155490932  
0.039514306 0.222302049 0.454179145 0.94619859 0.063994875  
rs60370841:66653201:GCCAGGCAGGACC:G ENSG00000255517  
rs58800112:66653342:G:T:ENSG00000255517 0.18193752 0.039514306  
0.269469279 0.472415297 0.947231409 0.063994875  
rs58800112:66653342:G:T ENSG00000255517  
rs61507062:66653925:GCTCA:G:ENSG00000255517 0.175415731 0.039514306  
0.269469279 0.472415297 0.946682669 0.063994875  
rs61507062:66653925:GCTCA:G ENSG00000255517

rs75873993:66655811:A:G:ENSG00000255517 0.271758927 0.039514306  
0.429802874 0.517229412 0.947231409 0.063994875  
rs75873993:66655811:A:G ENSG00000255517  
rs78682138:66656169:A:G:ENSG00000255517 0.175415731 0.039514306  
0.269469279 0.476011459 0.946682669 0.063994875  
rs78682138:66656169:A:G ENSG00000255517  
rs75168714:66656211:C:T:ENSG00000255517 0.175415731 0.039514306  
0.269469279 0.476011459 0.946682669 0.063994875  
rs75168714:66656211:C:T ENSG00000255517  
rs114098501:66657917:G:A:ENSG00000255517 0.169284753 0.039514306  
0.269469279 0.481611326 0.946682669 0.063994875  
rs114098501:66657917:G:A ENSG00000255517  
rs112098903:66658621:A:G:ENSG00000255517 0.169284753 0.039514306  
0.269469279 0.481611326 0.946682669 0.063994875  
rs112098903:66658621:A:G ENSG00000255517  
rs71479547:73480930:T:C:ENSG00000175581 0.035322296 0.209793344  
0.054815691 0.072575018 0.069942274 0.063994875  
rs71479547:73480930:T:C ENSG00000175581  
rs9666165:73488246:C:T:ENSG00000175581 0.035322296 0.174910011  
0.054815691 0.072575018 0.069942274 0.063994875  
rs9666165:73488246:C:T ENSG00000175581  
rs113857621:73491385:A:G:ENSG00000175581 0.035322296 0.110495165  
0.054815691 0.072575018 0.069942274 0.063994875  
rs113857621:73491385:A:G ENSG00000175581  
rs72989220:73498094:T:C:ENSG00000175581 0.035322296 0.12731097  
0.054815691 0.072575018 0.069942274 0.063994875  
rs72989220:73498094:T:C ENSG00000175581  
rs72989224:73500783:T:C:ENSG00000175581 0.035322296 0.12731097  
0.054815691 0.072575018 0.069942274 0.063994875  
rs72989224:73500783:T:C ENSG00000175581  
rs4944961:74559481:C:T:ENSG00000166435 0.035322296 0.30271551  
0.731144493 0.603611735 0.54593522 0.738263203  
rs4944961:74559481:C:T ENSG00000166435  
rs673731:74566400:G:A:ENSG00000166435 0.260395929 0.039514306  
0.782893708 0.478009532 0.198669295 0.140342165 rs673731:74566400:G:A  
ENSG00000166435  
rs507305:74594380:T:G:ENSG00000166435 0.239371492 0.039514306  
0.782893708 0.450346002 0.173591669 0.140342165 rs507305:74594380:T:G  
ENSG00000166435  
rs1315299:74598976:G:C:ENSG00000166435 0.239371492 0.039514306  
0.786960718 0.455203609 0.173591669 0.140342165  
rs1315299:74598976:G:C ENSG00000166435  
rs111694354:76464812:GCGGAAAAAGTTA:G:ENSG00000254632 0.18193752  
0.039514306 0.828327833 0.072575018 0.173591669 0.382106273  
rs111694354:76464812:GCGGAAAAAGTTA:G ENSG00000254632  
rs7942368:ENSG00000254632 0.336997499 0.039514306 0.792227512  
0.072575018 0.148497947 0.174366738 rs7942368 ENSG00000254632  
rs10160769:76474827:G:C:ENSG00000254632 0.146968287 0.039514306  
0.621329859 0.072575018 0.148497947 0.174366738  
rs10160769:76474827:G:C ENSG00000254632  
rs7933092:76475488:C:T:ENSG00000254632 0.328661655 0.039514306 0.80410788  
0.123210094 0.266901314 0.401203391 rs7933092:76475488:C:T  
ENSG00000254632

rs1440977:76476429:C:T:ENSG00000254632 0.328661655 0.039514306 0.80525444  
0.123210094 0.266901314 0.401203391 rs1440977:76476429:C:T  
ENSG00000254632

rs1149600:76478854:C:T:ENSG00000254632 0.035322296 0.039514306  
0.539346559 0.072575018 0.112902598 0.063994875  
rs1149600:76478854:C:T ENSG00000254632

rs876361:76479205:A:G:ENSG00000254632 0.035322296 0.039514306 0.5960947  
0.072575018 0.112902598 0.063994875 rs876361:76479205:A:G  
ENSG00000254632

rs3077873:76479391:A:AGCCTTCCT:ENSG00000254632 0.155490932  
0.039514306 0.828327833 0.123210094 0.148497947 0.140342165  
rs3077873:76479391:A:AGCCTTCCT ENSG00000254632

rs1149602:76479810:G:A:ENSG00000254632 0.146968287 0.039514306  
0.485354668 0.072575018 0.069942274 0.063994875  
rs1149602:76479810:G:A ENSG00000254632

rs1149603:ENSG00000254632 0.035322296 0.039514306 0.608285859  
0.072575018 0.112902598 0.063994875 rs1149603 ENSG00000254632

rs11826199:82644764:C:G:ENSG00000137509 0.175415731 0.039514306  
0.578118442 0.751091602 0.87814657 0.75395128  
rs11826199:82644764:C:G ENSG00000137509

rs7927201:ENSG00000137509 0.205647498 0.039514306 0.589831546  
0.751091602 0.878531039 0.75609486 rs7927201 ENSG00000137509

rs76009608:82656522:G:A:ENSG00000137509 0.162871942 0.039514306  
0.579382297 0.751091602 0.87814657 0.75395128  
rs76009608:82656522:G:A ENSG00000137509

rs609124:94065953:G:A:ENSG00000020922 0.310004009 0.039514306  
0.828327833 0.226823504 0.87814657 0.813853703 rs609124:94065953:G:A  
ENSG00000020922

rs519263:94068220:C:T:ENSG00000020922 0.378927762 0.039514306  
0.828327833 0.263905944 0.937640919 0.813853703 rs519263:94068220:C:T  
ENSG00000020922

rs608238:94068829:A:G:ENSG00000020922 0.378927762 0.039514306  
0.824592807 0.263905944 0.931119464 0.813853703 rs608238:94068829:A:G  
ENSG00000020922

rs1784090:94068974:C:T:ENSG00000020922 0.378927762 0.039514306 0.82369917  
0.263905944 0.930914437 0.813853703 rs1784090:94068974:C:T  
ENSG00000020922

rs610401:94069332:A:C:ENSG00000020922 0.378927762 0.039514306  
0.820123249 0.263905944 0.930914437 0.813853703 rs610401:94069332:A:C  
ENSG00000020922

rs1783679:94069399:C:A:ENSG00000020922 0.381061816 0.039514306  
0.820914955 0.263905944 0.931119464 0.813853703  
rs1783679:94069399:C:A ENSG00000020922

rs622647:94069719:T:C:ENSG00000020922 0.290380371 0.039514306  
0.828327833 0.165229468 0.945708374 0.740998143 rs622647:94069719:T:C  
ENSG00000020922

rs694262:94071167:A:G:ENSG00000020922 0.271758927 0.039514306  
0.837103534 0.123210094 0.9305498 0.603453089 rs694262:94071167:A:G  
ENSG00000020922

rs10910420:234509259:G:C:ENSG00000168275 0.035322296 0.066642396  
0.626808341 0.558498626 0.887480433 0.813853703  
rs10910420:234509259:G:C ENSG00000168275



rs7523348:234511503:A:G:ENSG00000168275 0.035322296 0.066642396  
0.622330718 0.558498626 0.884443178 0.813853703  
rs7523348:234511503:A:G ENSG00000168275  
rs74680187:236690989:CA:CAAAAA:ENSG00000223776 0.146968287  
0.039514306 0.054815691 0.165229468 0.311775972 0.550290331  
rs74680187:236690989:CA:CAAAAA ENSG00000223776  
rs113450127:236691228:G:T:ENSG00000223776 0.035322296 0.039514306  
0.054815691 0.072575018 0.069942274 0.382106273  
rs113450127:236691228:G:T ENSG00000223776  
rs73113011:236692480:G:A:ENSG00000223776 0.146968287 0.039514306  
0.485354668 0.326422852 0.484480155 0.69709058  
rs73113011:236692480:G:A ENSG00000223776  
rs73113014:236695157:T:C:ENSG00000223776 0.146968287 0.039514306  
0.054815691 0.165229468 0.288162171 0.545172079  
rs73113014:236695157:T:C ENSG00000223776  
rs73113027:236699455:C:T:ENSG00000223776 0.200359533 0.039514306  
0.238368074 0.399004389 0.467095788 0.590052663  
rs73113027:236699455:C:T ENSG00000223776  
rs2093516:236700386:G:C:ENSG00000223776 0.035322296 0.039514306 0.14398786  
0.072575018 0.57001038 0.56328436 rs2093516:236700386:G:C  
ENSG00000223776  
exml61782:ENSG00000223776 0.035322296 0.089622533 0.184980376  
0.123210094 0.636822477 0.616432465 exml61782 ENSG00000223776  
rs2298096:236709508:G:A:ENSG00000223776 0.035322296 0.12731097  
0.090437058 0.276782326 0.731870438 0.550290331  
rs2298096:236709508:G:A ENSG00000223776  
exml61831:ENSG00000223776 0.146968287 0.039514306 0.470302738  
0.301206855 0.490050927 0.681432383 exml61831 ENSG00000223776  
rs73113054:236718060:C:T:ENSG00000223776 0.100009087 0.039514306  
0.054815691 0.276782326 0.279727316 0.471730191  
rs73113054:236718060:C:T ENSG00000223776  
rs73113088:236726027:T:G:ENSG00000223776 0.117465891 0.039514306  
0.090437058 0.263905944 0.279727316 0.497503372  
rs73113088:236726027:T:G ENSG00000223776  
rs73113092:236727517:A:C:ENSG00000223776 0.035322296 0.039514306  
0.054815691 0.072575018 0.112902598 0.374953256  
rs73113092:236727517:A:C ENSG00000223776  
rs16833919:236728236:C:G:ENSG00000223776 0.132837758 0.039514306  
0.054815691 0.123210094 0.300892226 0.52739468  
rs16833919:236728236:C:G ENSG00000223776  
rs7545816:236747701:C:T:ENSG00000223776 0.146968287 0.039514306  
0.054815691 0.072575018 0.403448628 0.501122218  
rs7545816:236747701:C:T ENSG00000223776  
rs16833998:236750122:C:T:ENSG00000223776 0.146968287 0.039514306  
0.054815691 0.072575018 0.395007577 0.501122218  
rs16833998:236750122:C:T ENSG00000223776  
rs16834003:236751619:T:C:ENSG00000223776 0.211426254 0.039514306  
0.548514013 0.36680942 0.650850274 0.674365303  
rs16834003:236751619:T:C ENSG00000223776  
rs113697446:236753538:G:GT:ENSG00000223776 0.282721177 0.039514306  
0.054815691 0.072575018 0.403448628 0.535941137  
rs113697446:236753538:G:GT ENSG00000223776  
JHU\_1.242345673:ENSG00000229022 0.100009087 0.039514306 0.640107889  
0.701322763 0.690981753 0.347302535 JHU\_1.242345673 ENSG00000229022

rs316837:ENSG00000229022 0.117465891 0.039514306 0.640107889  
0.701322763 0.690981753 0.347302535 rs316837 ENSG00000229022  
rs316828:242358772:G:T:ENSG00000229022 0.117465891 0.039514306  
0.628778955 0.700422823 0.690981753 0.333543658  
rs316828:242358772:G:T ENSG00000229022  
rs420622:242364908:T:C:ENSG00000229022 0.146129194 0.039514306  
0.743226112 0.684309281 0.676756626 0.282646046  
rs420622:242364908:T:C ENSG00000229022  
rs316867:242366734:G:A:ENSG00000229022 0.146129194 0.039514306  
0.770177467 0.682707496 0.635943247 0.24867752  
rs316867:242366734:G:A ENSG00000229022  
rs316856:242372705:A:G:ENSG00000229022 0.162871942 0.039514306  
0.828327833 0.668553647 0.595947504 0.201281701  
rs316856:242372705:A:G ENSG00000229022  
rs7523438:ENSG00000229447 0.446625656 0.039514306 0.054815691  
0.072575018 0.490050927 0.769253158 rs7523438 ENSG00000229447  
rs6669381:31833506:A:G:ENSG00000229447 0.295612735 0.039514306  
0.054815691 0.263905944 0.484480155 0.731384436  
rs6669381:31833506:A:G ENSG00000229447  
rs35970612:43579734:A:T:ENSG00000186973 0.035322296 0.651399716  
0.283332252 0.072575018 0.484480155 0.707675982  
rs35970612:43579734:A:T ENSG00000186973  
rs1098564:43579899:C:T:ENSG00000186973 0.035322296 0.651399716  
0.269469279 0.072575018 0.484480155 0.707675982  
rs1098564:43579899:C:T ENSG00000186973  
rs11213820:111160491:T:C:ENSG00000196167 0.390769583 0.039514306  
0.054815691 0.566350534 0.589126514 0.347302535  
rs11213820:111160491:T:C ENSG00000196167  
rs4477469:111160753:C:T:ENSG00000196167 0.390769583 0.039514306  
0.054815691 0.566350534 0.589126514 0.347302535  
rs4477469:111160753:C:T ENSG00000196167  
rs10789822:111162691:A:G:ENSG00000196167 0.398495813 0.039514306  
0.054815691 0.563128951 0.599377315 0.369977602  
rs10789822:111162691:A:G ENSG00000196167  
rs7103178:111165009:C:T:ENSG00000196167 0.446625656 0.039514306  
0.360243455 0.617124137 0.71243013 0.511827661  
rs7103178:111165009:C:T ENSG00000196167  
rs12296076:111166504:G:A:ENSG00000196167 0.301603763 0.039514306  
0.222302049 0.558498626 0.54593522 0.460921055  
rs12296076:111166504:G:A ENSG00000196167  
rs7944895:111167776:C:G:ENSG00000196167 0.253880551 0.039514306  
0.054815691 0.481611326 0.532319281 0.108665807  
rs7944895:111167776:C:G ENSG00000196167  
rs11213823:111169990:T:C:ENSG00000196167 0.39944164 0.039514306  
0.090437058 0.558498626 0.704734536 0.282646046  
rs11213823:111169990:T:C ENSG00000196167  
rs7105857:111170744:C:T:ENSG00000196167 0.260395929 0.039514306  
0.054815691 0.478009532 0.498016841 0.108665807  
rs7105857:111170744:C:T ENSG00000196167  
rs7122375:111171071:T:C:ENSG00000196167 0.393141652 0.039514306  
0.121437838 0.558498626 0.699395727 0.24867752  
rs7122375:111171071:T:C ENSG00000196167

rs3802840:111171646:T:G:ENSG00000196167 0.393141652 0.039514306  
0.121437838 0.558498626 0.699395727 0.269135872  
rs3802840:111171646:T:G ENSG00000196167  
rs3802841:111171672:G:T:ENSG00000196167 0.393141652 0.039514306  
0.121437838 0.558498626 0.699395727 0.269135872  
rs3802841:111171672:G:T ENSG00000196167  
rs3802842:ENSG00000196167 0.401149097 0.039514306 0.090437058  
0.558498626 0.70749687 0.282646046 rs3802842 ENSG00000196167  
JHU\_11.111172178:ENSG00000196167 0.386834658 0.039514306 0.054815691  
0.558498626 0.690981753 0.225997306 JHU\_11.111172178 ENSG00000196167  
rs61914772:11013319:C:T:ENSG00000247157 0.488334683 0.039514306 0.65244831  
0.072575018 0.112902598 0.593888412 rs61914772:11013319:C:T  
ENSG00000247157  
rs17742991:11019271:T:C:ENSG00000247157 0.488334683 0.039514306 0.65244831  
0.072575018 0.112902598 0.593888412 rs17742991:11019271:T:C  
ENSG00000247157  
rs140711835:11044252:CTTG:C:ENSG00000255837 0.215796307 0.039514306  
0.618696386 0.442167795 0.731951824 0.619162849  
rs140711835:11044252:CTTG:C ENSG00000255837  
rs10772383:11049651:G:A:ENSG00000247157 0.343380618 0.039514306 0.48190184  
0.072575018 0.069942274 0.358316132 rs10772383:11049651:G:A  
ENSG00000247157  
rs10845233:11051749:T:G:ENSG00000255837 0.132837758 0.039514306  
0.539346559 0.36680942 0.603710229 0.464247637  
rs10845233:11051749:T:G ENSG00000255837  
rs7486068:11054322:C:T:ENSG00000255837 0.146129194 0.039514306  
0.568513848 0.385352708 0.683006713 0.510329036  
rs7486068:11054322:C:T ENSG00000255837  
rs2418220:11055314:T:A:ENSG00000255837 0.146968287 0.039514306  
0.507796015 0.36680942 0.580298595 0.451526982  
rs2418220:11055314:T:A ENSG00000255837  
rs2110094:11055946:A:C:ENSG00000255837 0.132837758 0.039514306  
0.539346559 0.36680942 0.603710229 0.464247637  
rs2110094:11055946:A:C ENSG00000255837  
rs2110095:11056062:C:T:ENSG00000255837 0.132837758 0.039514306  
0.539346559 0.36680942 0.603710229 0.464247637  
rs2110095:11056062:C:T ENSG00000255837  
rs11054068:11056511:A:G:ENSG00000255837 0.132837758 0.039514306  
0.539346559 0.36680942 0.603710229 0.464247637  
rs11054068:11056511:A:G ENSG00000255837  
rs10845236:11057035:T:C:ENSG00000255837 0.248591073 0.039514306  
0.624665248 0.489772876 0.765632175 0.650718924  
rs10845236:11057035:T:C ENSG00000255837  
rs10845237:11057384:G:C:ENSG00000255837 0.132837758 0.039514306  
0.539346559 0.36680942 0.603710229 0.464247637  
rs10845237:11057384:G:C ENSG00000255837  
rs7968736:11058890:T:A:ENSG00000255837 0.132837758 0.039514306  
0.539346559 0.36680942 0.603710229 0.464247637  
rs7968736:11058890:T:A ENSG00000255837  
rs10845239:11059191:T:A:ENSG00000255837 0.253880551 0.039514306  
0.634291162 0.491850645 0.771563861 0.643131518  
rs10845239:11059191:T:A ENSG00000255837  
exm984113:ENSG00000255837 0.248591073 0.039514306 0.625050185  
0.491850645 0.765632175 0.659336192 exm984113 ENSG00000255837

rs10772386:11062996:G:A:ENSG00000255837 0.132837758 0.039514306  
0.545428271 0.36680942 0.617728871 0.469127215  
rs10772386:11062996:G:A ENSG00000255837  
rs10772387:11063365:G:A:ENSG00000255837 0.169284753 0.039514306  
0.572955873 0.406267798 0.690981753 0.553258882  
rs10772387:11063365:G:A ENSG00000255837  
rs7299223:11063996:A:G:ENSG00000255837 0.169284753 0.039514306  
0.572955873 0.406267798 0.690981753 0.553258882  
rs7299223:11063996:A:G ENSG00000255837  
rs10845241:11065827:T:C:ENSG00000255837 0.18193752 0.039514306  
0.575705306 0.406267798 0.690981753 0.556049114  
rs10845241:11065827:T:C ENSG00000255837  
rs718109:11067108:C:A:ENSG00000255837 0.132837758 0.039514306  
0.614457891 0.263905944 0.477032507 0.464247637 rs718109:11067108:C:A  
ENSG00000255837  
rs7398041:11067524:G:A:ENSG00000247157 0.349088436 0.039514306  
0.613735952 0.072575018 0.148497947 0.140342165  
rs7398041:11067524:G:A ENSG00000247157  
rs35885379:11068880:ACT:A:ENSG00000255837 0.18193752 0.039514306  
0.579382297 0.419678998 0.690981753 0.562535698  
rs35885379:11068880:ACT:A ENSG00000255837  
rs10772389:11069712:A:G:ENSG00000255837 0.18193752 0.039514306  
0.579382297 0.419678998 0.690981753 0.562535698  
rs10772389:11069712:A:G ENSG00000255837  
rs11054073:11070679:T:C:ENSG00000255837 0.18193752 0.039514306  
0.579382297 0.419678998 0.690981753 0.562535698  
rs11054073:11070679:T:C ENSG00000255837  
rs34861336:11300493:C:T:ENSG00000247157 0.501944426 0.039514306  
0.618696386 0.496527133 0.559581427 0.174366738  
rs34861336:11300493:C:T ENSG00000247157  
rs7312090:ENSG00000256564 0.081933656 0.039514306 0.054815691  
0.072575018 0.266901314 0.063994875 rs7312090 ENSG00000256564  
rs10744119:16522636:C:T:ENSG00000256564 0.100009087 0.039514306  
0.054815691 0.072575018 0.438540244 0.063994875  
rs10744119:16522636:C:T ENSG00000256564  
rs10783858:58322764:C:A:ENSG00000166896 0.282721177 0.039514306  
0.828327833 0.558498626 0.882854595 0.282646046  
rs10783858:58322764:C:A ENSG00000166896  
rs2372309:58329820:G:A:ENSG00000166896 0.25732594 0.039514306  
0.828327833 0.528521718 0.842584591 0.295623551  
rs2372309:58329820:G:A ENSG00000166896  
rs139501087:58330211:CTTTA:C:ENSG00000166896 0.271758927 0.039514306  
0.828327833 0.558498626 0.874881554 0.308405655  
rs139501087:58330211:CTTTA:C ENSG00000166896  
rs77531406:58331514:C:CAAAAACA:ENSG00000166896 0.28152348  
0.039514306 0.828327833 0.558498626 0.892634082 0.347302535  
rs77531406:58331514:C:CAAAAACA ENSG00000166896  
rs3751326:58335330:C:G:ENSG00000166896 0.280686821 0.039514306  
0.828327833 0.5834429 0.901801828 0.358316132  
rs3751326:58335330:C:G ENSG00000166896  
rs11172841:59352431:A:C:ENSG00000139263 0.035322296 0.281740211  
0.845255291 0.731347216 0.9305498 0.813853703  
rs11172841:59352431:A:C ENSG00000139263

rs61919473:59356801:T:C:ENSG00000139263 0.035322296 0.110495165  
0.828327833 0.671388768 0.871663065 0.767777303  
rs61919473:59356801:T:C ENSG00000139263  
rs10877194:59359384:T:A:ENSG00000139263 0.035322296 0.089622533  
0.828327833 0.679809501 0.882854595 0.772415663  
rs10877194:59359384:T:A ENSG00000139263  
rs7967014:75870595:C:T:ENSG00000257497 0.035322296 0.364271932  
0.548514013 0.290136921 0.069942274 0.468334324  
rs7967014:75870595:C:T ENSG00000257497  
rs11180540:ENSG00000257497 0.035322296 0.367821565 0.536792521  
0.358702521 0.069942274 0.460921055 rs11180540 ENSG00000257497  
rs2292010:75876181:A:G:ENSG00000257497 0.035322296 0.311964405  
0.495886418 0.326422852 0.069942274 0.423659401  
rs2292010:75876181:A:G ENSG00000257497  
rs3741496:75891253:T:C:ENSG00000257497 0.035322296 0.290843861 0.50017961  
0.387628207 0.069942274 0.390568128 rs3741496:75891253:T:C  
ENSG00000257497  
rs77121786:102446675:T:G:ENSG00000120860 0.035322296 0.110495165  
0.725010873 0.491850645 0.931716561 0.813853703  
rs77121786:102446675:T:G ENSG00000120860  
rs7977178:102483822:G:C:ENSG00000120860 0.035322296 0.039514306  
0.612361159 0.445043357 0.9305498 0.806716707  
rs7977178:102483822:G:C ENSG00000120860  
rs11111163:102491983:C:T:ENSG00000120860 0.035322296 0.039514306  
0.536792521 0.491850645 0.9305498 0.762727032  
rs11111163:102491983:C:T ENSG00000120860  
rs75162381:102497698:A:G:ENSG00000120860 0.035322296 0.039514306  
0.580001614 0.36680942 0.9305498 0.782163764  
rs75162381:102497698:A:G ENSG00000120860  
rs5800497:102508138:AC:A:ENSG00000120860 0.035322296 0.039514306  
0.587216849 0.442167795 0.9305498 0.798338031  
rs5800497:102508138:AC:A ENSG00000120860  
rs11111168:102509931:C:A:ENSG00000120860 0.035322296 0.039514306  
0.576180386 0.350892299 0.9305498 0.782163764  
rs11111168:102509931:C:A ENSG00000120860  
rs17529215:102510208:G:T:ENSG00000120860 0.035322296 0.039514306  
0.603335467 0.441817908 0.9305498 0.806716707  
rs17529215:102510208:G:T ENSG00000120860  
rs11111173:102531566:A:C:ENSG00000120860 0.035322296 0.039514306  
0.59314904 0.445043357 0.9305498 0.797872501  
rs11111173:102531566:A:C ENSG00000120860  
rs76825149:102541667:A:G:ENSG00000120860 0.100009087 0.039514306  
0.650184334 0.491850645 0.9305498 0.813853703  
rs76825149:102541667:A:G ENSG00000120860  
rs11111183:102551714:C:T:ENSG00000120860 0.035322296 0.039514306  
0.679533134 0.491850645 0.9305498 0.791549651  
rs11111183:102551714:C:T ENSG00000120860  
rs115193870:102577710:G:A:ENSG00000120860 0.035322296 0.202241296  
0.679533134 0.558498626 0.946682669 0.629184088  
rs115193870:102577710:G:A ENSG00000120860  
rs56307643:102600358:CTT:C:ENSG00000120860 0.035322296 0.066642396  
0.752478809 0.489772876 0.9305498 0.7765296  
rs56307643:102600358:CTT:C ENSG00000120860

rs73388778:102760710:C:G:ENSG00000120860 0.035322296 0.3227674  
0.794505705 0.677268785 0.938476707 0.629184088  
rs73388778:102760710:C:G ENSG00000120860  
rs73388787:102770163:G:C:ENSG00000120860 0.035322296 0.329515493  
0.80525444 0.689549544 0.9305498 0.640308963  
rs73388787:102770163:G:C ENSG00000120860  
rs1027949:110430968:A:G:ENSG00000174456 0.035322296 0.507089732  
0.184980376 0.751091602 0.519536868 0.469127215  
rs1027949:110430968:A:G ENSG00000174456  
rs10849627:110438238:G:T:ENSG00000174456 0.035322296 0.525463402  
0.165546404 0.755899513 0.519536868 0.460921055  
rs10849627:110438238:G:T ENSG00000174456  
rs7300927:110458532:A:G:ENSG00000174456 0.035322296 0.493116043  
0.090437058 0.752790479 0.480692872 0.447199093  
rs7300927:110458532:A:G ENSG00000174456  
rs59188958:111919638:G:A:ENSG00000198270 0.35010809 0.039514306  
0.576180386 0.747912191 0.9305498 0.83504529  
rs59188958:111919638:G:A ENSG00000198270  
rs57081594:112009830:A:AG:ENSG00000198270 0.146968287 0.039514306  
0.813888623 0.780515676 0.850760242 0.798338031  
rs57081594:112009830:A:AG ENSG00000198270  
rs73418393:112111353:T:C:ENSG00000198270 0.248591073 0.039514306  
0.782434772 0.77760195 0.9305498 0.813853703  
rs73418393:112111353:T:C ENSG00000198270  
rs77509231:112111613:A:G:ENSG00000198270 0.243759522 0.039514306  
0.78047011 0.778469816 0.9305498 0.813853703  
rs77509231:112111613:A:G ENSG00000198270  
rs12315456:112129324:G:A:ENSG00000198270 0.243759522 0.039514306  
0.780198788 0.778868396 0.9305498 0.813853703  
rs12315456:112129324:G:A ENSG00000198270  
rs57748028:112136576:G:A:ENSG00000198270 0.23524183 0.039514306  
0.778199855 0.773621024 0.9305498 0.813853703  
rs57748028:112136576:G:A ENSG00000198270  
rs12310926:112144646:C:T:ENSG00000198270 0.23524183 0.039514306  
0.778199855 0.773621024 0.9305498 0.813853703  
rs12310926:112144646:C:T ENSG00000198270  
rs11064845:120051929:G:C:ENSG00000224982 0.035322296 0.675482151  
0.64643305 0.571216401 0.57001038 0.517746279  
rs11064845:120051929:G:C ENSG00000224982  
rs113428610:132621022:C:T:ENSG00000185684 0.395046141 0.039514306  
0.525522206 0.558498626 0.731325674 0.52739468  
rs113428610:132621022:C:T ENSG00000185684  
rs3199045:132621375:A:G:ENSG00000185163 0.035322296 0.257351931 0.42239248  
0.244282474 0.741314291 0.525367746 rs3199045:132621375:A:G  
ENSG00000185163  
rs10128885:132621754:G:A:ENSG00000185163 0.035322296 0.463260354  
0.14398786 0.276782326 0.903252402 0.451526982  
rs10128885:132621754:G:A ENSG00000185163  
rs11246938:132623186:C:T:ENSG00000185163 0.035322296 0.248891879  
0.42239248 0.276782326 0.750632228 0.540231732  
rs11246938:132623186:C:T ENSG00000185163  
rs12424892:132623389:G:C:ENSG00000185163 0.035322296 0.248891879  
0.42239248 0.276782326 0.750632228 0.545172079  
rs12424892:132623389:G:C ENSG00000185163



rs11246940:132623473:T:C:ENSG00000185163 0.035322296 0.265249339  
0.42239248 0.276782326 0.758499809 0.540231732  
rs11246940:132623473:T:C ENSG00000185163  
rs2442452:21211999:T:C:ENSG00000238286 0.035322296 0.668532818  
0.828327833 0.717626797 0.9305498 0.813853703  
rs2442452:21211999:T:C ENSG00000238286  
rs2497495:21216614:G:A:ENSG00000238286 0.035322296 0.668532818  
0.828327833 0.717626797 0.9305498 0.813853703  
rs2497495:21216614:G:A ENSG00000238286  
rs2442454:21216618:C:G:ENSG00000222726 0.035322296 0.654488658  
0.090437058 0.623386692 0.069942274 0.813853703  
rs2442454:21216618:C:G ENSG00000222726  
rs2442454:21216618:C:G:ENSG00000238286 0.035322296 0.517717788  
0.557353332 0.701991814 0.9305498 0.753387287  
rs2442454:21216618:C:G ENSG00000238286  
rs2497498:21222419:C:T:ENSG00000238286 0.035322296 0.668345116  
0.828327833 0.716753308 0.9305498 0.813853703  
rs2497498:21222419:C:T ENSG00000238286  
rs2497499:21223187:A:G:ENSG00000238286 0.035322296 0.668532818  
0.828327833 0.716285682 0.9305498 0.813853703  
rs2497499:21223187:A:G ENSG00000238286  
rs67051903:21250907:T:C:ENSG00000238286 0.035322296 0.668532818  
0.828327833 0.725128731 0.9305498 0.813853703  
rs67051903:21250907:T:C ENSG00000238286  
rs10400669:21253143:G:A:ENSG00000238286 0.035322296 0.670820679  
0.828327833 0.729477175 0.9305498 0.813853703  
rs10400669:21253143:G:A ENSG00000238286  
rs10400673:21253566:C:T:ENSG00000238286 0.035322296 0.670372225  
0.828327833 0.728294934 0.9305498 0.813853703  
rs10400673:21253566:C:T ENSG00000238286  
rs3969100:21255998:C:G:ENSG00000238286 0.035322296 0.668532818  
0.828327833 0.705423917 0.925113964 0.813853703  
rs3969100:21255998:C:G ENSG00000238286  
rs7982682:21257331:G:A:ENSG00000222726 0.035322296 0.563997567  
0.054815691 0.37163762 0.069942274 0.818977027  
rs7982682:21257331:G:A ENSG00000222726  
rs7982682:21257331:G:A:ENSG00000238286 0.035322296 0.668532818  
0.774174244 0.681982985 0.9305498 0.813853703  
rs7982682:21257331:G:A ENSG00000238286  
rs7984715:21257791:C:T:ENSG00000238286 0.035322296 0.654180889  
0.618696386 0.622429433 0.9305498 0.813853703  
rs7984715:21257791:C:T ENSG00000238286  
rs143824011:21260179:T:TC:ENSG00000222726 0.035322296 0.651399716  
0.054815691 0.379688866 0.069942274 0.813853703  
rs143824011:21260179:T:TC ENSG00000222726  
rs143824011:21260179:T:TC:ENSG00000238286 0.035322296 0.668532818  
0.828327833 0.70721118 0.925113964 0.813853703  
rs143824011:21260179:T:TC ENSG00000238286  
rs149752839:21260778:TATG:T:ENSG00000222726 0.035322296 0.651399716  
0.054815691 0.379688866 0.069942274 0.813853703  
rs149752839:21260778:TATG:T ENSG00000222726  
rs149752839:21260778:TATG:T:ENSG00000238286 0.035322296 0.668532818  
0.828327833 0.70721118 0.925113964 0.813853703  
rs149752839:21260778:TATG:T ENSG00000238286

rs7330396:21263439:T:C:ENSG00000222726 0.035322296 0.651399716  
0.121437838 0.390584104 0.069942274 0.813853703  
rs7330396:21263439:T:C ENSG00000222726  
rs7330396:21263439:T:C:ENSG00000238286 0.035322296 0.668532818  
0.828327833 0.709320069 0.925113964 0.813853703  
rs7330396:21263439:T:C ENSG00000238286  
rs11619739:24473381:C:T:ENSG00000205861 0.035322296 0.659458527  
0.054815691 0.072575018 0.9305498 0.063994875  
rs11619739:24473381:C:T ENSG00000205861  
rs11617793:24474724:G:A:ENSG00000205861 0.035322296 0.661594802  
0.054815691 0.072575018 0.9305498 0.063994875  
rs11617793:24474724:G:A ENSG00000205861  
rs372562884:28024687:GTACAGCGGATCTGCGGCGAGTCCCC:G:ENSG00000122033  
0.035322296 0.3227674 0.054815691 0.072575018 0.498016841  
0.063994875 rs372562884:28024687:GTACAGCGGATCTGCGGCGAGTCCCC:G  
ENSG00000122033  
rs7321650:28026695:G:A:ENSG00000122033 0.035322296 0.316996396  
0.054815691 0.072575018 0.493250562 0.063994875  
rs7321650:28026695:G:A ENSG00000122033  
rs146889296:43623125:CAT:C:ENSG00000120675 0.565744657 0.039514306  
0.65244831 0.77086265 0.069942274 0.063994875  
rs146889296:43623125:CAT:C ENSG00000120675  
rs111683717:43625539:GT:G:ENSG00000120675 0.565744657 0.039514306  
0.651509705 0.769112355 0.069942274 0.063994875  
rs111683717:43625539:GT:G ENSG00000120675  
rs9533362:43625801:A:G:ENSG00000120675 0.58567939 0.039514306  
0.842937047 0.751091602 0.069942274 0.419171564  
rs9533362:43625801:A:G ENSG00000120675  
rs9533363:43626226:G:A:ENSG00000120675 0.565744657 0.039514306  
0.651509705 0.76780829 0.069942274 0.063994875  
rs9533363:43626226:G:A ENSG00000120675  
rs9533376:43641050:C:T:ENSG00000120675 0.561219495 0.039514306 0.65244831  
0.753959404 0.112902598 0.108665807 rs9533376:43641050:C:T  
ENSG00000120675  
rs9525732:43645337:C:A:ENSG00000120675 0.367519282 0.039514306 0.50017961  
0.751091602 0.731325674 0.441545027 rs9525732:43645337:C:A  
ENSG00000120675  
rs9533378:43646516:G:A:ENSG00000120675 0.367519282 0.039514306 0.50017961  
0.751091602 0.731870438 0.441545027 rs9533378:43646516:G:A  
ENSG00000120675  
rs9594879:43653549:A:T:ENSG00000120675 0.36952798 0.039514306 0.50017961  
0.751091602 0.731325674 0.441545027 rs9594879:43653549:A:T  
ENSG00000120675  
rs10870768:43654658:G:A:ENSG00000120675 0.561052842 0.039514306  
0.651509705 0.754218833 0.112902598 0.108665807  
rs10870768:43654658:G:A ENSG00000120675  
rs11384038:43655581:A:AT:ENSG00000120675 0.359567157 0.039514306  
0.50017961 0.751091602 0.734695661 0.447199093  
rs11384038:43655581:A:AT ENSG00000120675  
rs68161393:43656319:GA:G:ENSG00000120675 0.472812833 0.039514306  
0.090437058 0.751091602 0.519536868 0.664807456  
rs68161393:43656319:GA:G ENSG00000120675

rs9315986:43656443:C:A:ENSG00000120675 0.36952798 0.039514306  
0.498407593 0.751091602 0.730942663 0.441545027  
rs9315986:43656443:C:A ENSG00000120675  
rs9533381:43658209:G:A:ENSG00000120675 0.36952798 0.039514306 0.50017961  
0.751091602 0.731325674 0.447199093 rs9533381:43658209:G:A  
ENSG00000120675  
rs9525733:43659274:T:C:ENSG00000120675 0.373921919 0.039514306 0.50017961  
0.751091602 0.731325674 0.447199093 rs9525733:43659274:T:C  
ENSG00000120675  
rs9533383:43663837:A:T:ENSG00000120675 0.559376911 0.039514306  
0.655792554 0.751091602 0.173591669 0.201281701  
rs9533383:43663837:A:T ENSG00000120675  
rs112020474:45915501:G:T:ENSG00000170919 0.035322296 0.512971076  
0.269469279 0.751091602 0.589126514 0.740998143  
rs112020474:45915501:G:T ENSG00000170919  
rs9595306:45919127:A:C:ENSG00000170919 0.035322296 0.396207958 0.20393713  
0.704092316 0.559581427 0.737268887 rs9595306:45919127:A:C  
ENSG00000170919  
rs9590895:45923747:A:G:ENSG00000170919 0.035322296 0.396207958 0.20393713  
0.704092316 0.559581427 0.736913564 rs9590895:45923747:A:G  
ENSG00000170919  
rs113967463:45933580:G:A:ENSG00000170919 0.035322296 0.407321946  
0.20393713 0.707827228 0.574209974 0.739943978  
rs113967463:45933580:G:A ENSG00000170919  
rs61704280:45934861:T:C:ENSG00000170919 0.035322296 0.413564954 0.20393713  
0.709320069 0.574209974 0.740076738 rs61704280:45934861:T:C  
ENSG00000170919  
rs9595313:45938671:C:A:ENSG00000170919 0.035322296 0.523385358  
0.269469279 0.751091602 0.614364441 0.752990839  
rs9595313:45938671:C:A ENSG00000170919  
rs73476557:45946982:C:A:ENSG00000170919 0.035322296 0.555150776  
0.269469279 0.751091602 0.679445541 0.762727032  
rs73476557:45946982:C:A ENSG00000170919  
rs9595316:45948359:G:A:ENSG00000170919 0.035322296 0.56559224  
0.269469279 0.751091602 0.685405973 0.772415663  
rs9595316:45948359:G:A ENSG00000170919  
rs9805304:45949677:C:T:ENSG00000170919 0.035322296 0.512971076  
0.238368074 0.726760123 0.679445541 0.769253158  
rs9805304:45949677:C:T ENSG00000170919  
rs10161660:45950930:T:G:ENSG00000170919 0.035322296 0.570353739  
0.269469279 0.751091602 0.690981753 0.7785228  
rs10161660:45950930:T:G ENSG00000170919  
rs10162203:45952609:C:G:ENSG00000170919 0.035322296 0.586797265  
0.283332252 0.757155561 0.690981753 0.781735686  
rs10162203:45952609:C:G ENSG00000170919  
rs56350840:45953293:G:T:ENSG00000170919 0.035322296 0.58760415  
0.283332252 0.751091602 0.690981753 0.780608344  
rs56350840:45953293:G:T ENSG00000170919  
rs55885295:45953307:C:T:ENSG00000170919 0.035322296 0.590118  
0.283332252 0.754218833 0.690981753 0.78106651  
rs55885295:45953307:C:T ENSG00000170919  
rs11841598:45954224:G:T:ENSG00000170919 0.035322296 0.515426761  
0.269469279 0.726760123 0.690981753 0.781735686  
rs11841598:45954224:G:T ENSG00000170919

rs28435544:45954988:G:C:ENSG00000170919 0.035322296 0.502579396  
0.054815691 0.69625478 0.450253392 0.358316132  
rs28435544:45954988:G:C ENSG00000170919  
rs111473660:45956575:T:G:ENSG00000170919 0.035322296 0.643711938  
0.269469279 0.729821915 0.812687026 0.813789279  
rs111473660:45956575:T:G ENSG00000170919  
rs74070670:45956644:C:G:ENSG00000170919 0.035322296 0.58760415  
0.269469279 0.75677042 0.690981753 0.781735686  
rs74070670:45956644:C:G ENSG00000170919  
rs113256989:45965483:G:A:ENSG00000170919 0.035322296 0.524250773  
0.238368074 0.731347216 0.690981753 0.777460719  
rs113256989:45965483:G:A ENSG00000170919  
rs78670880:24963826:G:A:ENSG00000100445 0.035322296 0.305849216  
0.054815691 0.778955161 0.069942274 0.813853703  
rs78670880:24963826:G:A ENSG00000100445  
rs77307365:34865302:T:G:ENSG00000165389 0.035322296 0.039514306  
0.054815691 0.072575018 0.112902598 0.063994875  
rs77307365:34865302:T:G ENSG00000165389  
rs7160736:34891565:T:C:ENSG00000165389 0.035322296 0.202241296  
0.054815691 0.290136921 0.112902598 0.063994875  
rs7160736:34891565:T:C ENSG00000165389  
rs12100582:35725889:T:G:ENSG00000100890 0.253880551 0.039514306  
0.828327833 0.435112224 0.311775972 0.813853703  
rs12100582:35725889:T:G ENSG00000100890  
rs2415278:35726224:G:A:ENSG00000100890 0.205647498 0.039514306  
0.832893967 0.123210094 0.420268827 0.813853703  
rs2415278:35726224:G:A ENSG00000100890  
rs10132920:35729291:C:T:ENSG00000100890 0.271758927 0.039514306  
0.828327833 0.445043357 0.371793022 0.813853703  
rs10132920:35729291:C:T ENSG00000100890  
rs28505171:35732891:C:A:ENSG00000100890 0.22504072 0.039514306  
0.828327833 0.390584104 0.311775972 0.813853703  
rs28505171:35732891:C:A ENSG00000100890  
rs8016140:ENSG00000100890 0.169284753 0.039514306 0.830713684  
0.406267798 0.266901314 0.813853703 rs8016140 ENSG00000100890  
rs34728568:35741240:C:CA:ENSG00000100890 0.228236375 0.039514306  
0.828327833 0.408307051 0.311775972 0.813853703  
rs34728568:35741240:C:CA ENSG00000100890  
rs8009666:35743596:C:T:ENSG00000100890 0.228236375 0.039514306  
0.828327833 0.408307051 0.311775972 0.813853703  
rs8009666:35743596:C:T ENSG00000100890  
rs7493705:35744288:A:C:ENSG00000100890 0.288194279 0.039514306  
0.828369156 0.424824518 0.347424829 0.813853703  
rs7493705:35744288:A:C ENSG00000100890  
rs2415284:35744568:G:T:ENSG00000100890 0.155490932 0.039514306  
0.853698456 0.290136921 0.173591669 0.813853703  
rs2415284:35744568:G:T ENSG00000100890  
rs1064248:35744839:G:A:ENSG00000100890 0.211426254 0.039514306  
0.853698456 0.358702521 0.218559406 0.813853703  
rs1064248:35744839:G:A ENSG00000100890  
rs28665705:35746312:A:G:ENSG00000100890 0.282721177 0.039514306  
0.828327833 0.442167795 0.371793022 0.813853703  
rs28665705:35746312:A:G ENSG00000100890

rs17103147:35747918:C:T:ENSG00000100890 0.282721177 0.039514306  
0.828327833 0.442167795 0.381322091 0.813853703  
rs17103147:35747918:C:T ENSG00000100890  
rs10149823:35748640:T:C:ENSG00000100890 0.282721177 0.039514306  
0.828327833 0.442167795 0.381322091 0.813853703  
rs10149823:35748640:T:C ENSG00000100890  
rs73239072:35749956:A:T:ENSG00000100890 0.282721177 0.039514306  
0.828327833 0.442167795 0.381322091 0.813853703  
rs73239072:35749956:A:T ENSG00000100890  
rs28708376:35751030:A:G:ENSG00000100890 0.282721177 0.039514306  
0.828327833 0.442167795 0.381322091 0.813853703  
rs28708376:35751030:A:G ENSG00000100890  
rs11845364:35752310:A:G:ENSG00000100890 0.219347314 0.039514306  
0.828327833 0.072575018 0.218559406 0.732355467  
rs11845364:35752310:A:G ENSG00000100890  
rs6571709:35753888:G:T:ENSG00000100890 0.291376195 0.039514306  
0.828327833 0.447551187 0.381322091 0.813853703  
rs6571709:35753888:G:T ENSG00000100890  
rs10142846:35755087:G:T:ENSG00000100890 0.190392053 0.039514306 0.83247031  
0.414104514 0.311775972 0.813853703 rs10142846:35755087:G:T  
ENSG00000100890  
rs876996:35755296:G:A:ENSG00000100890 0.200359533 0.039514306  
0.853698456 0.350892299 0.218559406 0.813853703 rs876996:35755296:G:A  
ENSG00000100890  
rs2277461:35761366:A:G:ENSG00000100890 0.28152348 0.039514306  
0.828327833 0.442167795 0.381322091 0.813853703  
rs2277461:35761366:A:G ENSG00000100890  
rs2277459:ENSG00000100890 0.282721177 0.039514306 0.828327833  
0.442167795 0.371793022 0.813853703 rs2277459 ENSG00000100890  
rs28595436:35763438:G:T:ENSG00000100890 0.271758927 0.039514306  
0.828327833 0.399004389 0.311775972 0.813853703  
rs28595436:35763438:G:T ENSG00000100890  
rs35985921:35763480:A:AC:ENSG00000100890 0.290380371 0.039514306  
0.828327833 0.447551187 0.445056985 0.813853703  
rs35985921:35763480:A:AC ENSG00000100890  
rs56899036:35767934:T:TTTA:ENSG00000100890 0.271758927 0.039514306  
0.70601294 0.419678998 0.381322091 0.822986502  
rs56899036:35767934:T:TTTA ENSG00000100890  
rs8010905:35768272:G:A:ENSG00000100890 0.288194279 0.039514306  
0.728288658 0.476011459 0.395007577 0.823834589  
rs8010905:35768272:G:A ENSG00000100890  
rs10134308:35777531:G:A:ENSG00000100890 0.361838155 0.039514306  
0.806718901 0.472415297 0.493250562 0.833015383  
rs10134308:35777531:G:A ENSG00000100890  
rs111388219:35782964:A:G:ENSG00000100890 0.336997499 0.039514306  
0.774918193 0.454179145 0.477032507 0.83346897  
rs111388219:35782964:A:G ENSG00000100890  
rs7149602:35787669:T:C:ENSG00000100890 0.365060315 0.039514306  
0.806718901 0.472415297 0.519536868 0.831753861  
rs7149602:35787669:T:C ENSG00000100890  
rs7148424:35787827:A:G:ENSG00000100890 0.339000963 0.039514306  
0.774918193 0.450346002 0.480692872 0.832178722  
rs7148424:35787827:A:G ENSG00000100890

rs1804820:57676330:G:T:ENSG00000070367 0.035322296 0.583196386  
0.761772115 0.736814521 0.069942274 0.614118716  
rs1804820:57676330:G:T ENSG00000070367  
rs10143527:57676511:T:A:ENSG00000070367 0.035322296 0.682685759  
0.589831546 0.653716589 0.069942274 0.768929031  
rs10143527:57676511:T:A ENSG00000070367  
rs28807516:57678446:C:A:ENSG00000070367 0.035322296 0.59034627  
0.749414821 0.736267142 0.069942274 0.611611212  
rs28807516:57678446:C:A ENSG00000070367  
rs73290112:57678791:C:T:ENSG00000070367 0.035322296 0.573615857  
0.746997764 0.736814521 0.069942274 0.60918994  
rs73290112:57678791:C:T ENSG00000070367  
rs10140987:57679484:A:G:ENSG00000070367 0.035322296 0.57709595  
0.747767793 0.735483942 0.069942274 0.60918994  
rs10140987:57679484:A:G ENSG00000070367  
rs10130517:57679765:T:C:ENSG00000070367 0.035322296 0.574428997  
0.746997764 0.736140631 0.069942274 0.60918994  
rs10130517:57679765:T:C ENSG00000070367  
rs10133566:57680056:C:T:ENSG00000070367 0.035322296 0.570701598  
0.828327833 0.684309281 0.069942274 0.540231732  
rs10133566:57680056:C:T ENSG00000070367  
rs111355148:57680556:T:C:ENSG00000070367 0.035322296 0.573615857  
0.744376278 0.735483942 0.069942274 0.611611212  
rs111355148:57680556:T:C ENSG00000070367  
rs73290116:57680603:A:G:ENSG00000070367 0.035322296 0.458797961  
0.641688238 0.688857419 0.112902598 0.775020218  
rs73290116:57680603:A:G ENSG00000070367  
rs113394236:57680666:A:C:ENSG00000070367 0.035322296 0.573615857  
0.747767793 0.736140631 0.069942274 0.611611212  
rs113394236:57680666:A:C ENSG00000070367  
rs73290117:57680886:A:G:ENSG00000070367 0.035322296 0.574428997  
0.750174412 0.736267142 0.069942274 0.611611212  
rs73290117:57680886:A:G ENSG00000070367  
rs57976868:57680938:G:A:ENSG00000070367 0.035322296 0.573615857 0.75173213  
0.736140631 0.069942274 0.60918994 rs57976868:57680938:G:A  
ENSG00000070367  
rs8019850:57685434:C:T:ENSG00000070367 0.035322296 0.603890882  
0.578118442 0.472415297 0.069942274 0.813853703  
rs8019850:57685434:C:T ENSG00000070367  
rs10133958:57687488:G:A:ENSG00000070367 0.035322296 0.57709595  
0.754949626 0.735483942 0.069942274 0.611611212  
rs10133958:57687488:G:A ENSG00000070367  
rs8015967:57687997:A:G:ENSG00000070367 0.035322296 0.580313  
0.622330718 0.493098162 0.069942274 0.813853703  
rs8015967:57687997:A:G ENSG00000070367  
rs11846972:57688856:A:T:ENSG00000070367 0.035322296 0.316996396  
0.647729604 0.558498626 0.069942274 0.813853703  
rs11846972:57688856:A:T ENSG00000070367  
rs7141360:57691734:C:T:ENSG00000070367 0.035322296 0.578883077  
0.759245271 0.735483942 0.069942274 0.613318589  
rs7141360:57691734:C:T ENSG00000070367  
rs10133193:57692731:G:A:ENSG00000070367 0.035322296 0.578883077  
0.759245271 0.735483942 0.069942274 0.613318589  
rs10133193:57692731:G:A ENSG00000070367



rs10133137:57692835:C:A:ENSG00000070367 0.035322296 0.578883077  
0.760415187 0.734906841 0.069942274 0.613318589  
rs10133137:57692835:C:A ENSG00000070367  
rs7152967:57693437:C:G:ENSG00000070367 0.035322296 0.631133206  
0.568513848 0.559048117 0.069942274 0.813853703  
rs7152967:57693437:C:G ENSG00000070367  
rs10136423:57693829:C:T:ENSG00000070367 0.035322296 0.58760415  
0.753805316 0.734906841 0.069942274 0.619162849  
rs10136423:57693829:C:T ENSG00000070367  
JHU\_14.57697163:ENSG00000070367 0.035322296 0.38687185 0.734607875  
0.723001209 0.069942274 0.617532259 JHU\_14.57697163 ENSG00000070367  
rs1980783:57704232:T:C:ENSG00000070367 0.035322296 0.651399716  
0.645109255 0.705838141 0.069942274 0.813853703  
rs1980783:57704232:T:C ENSG00000070367  
rs9323304:57712482:A:C:ENSG00000070367 0.035322296 0.581512524  
0.626634581 0.500294942 0.069942274 0.813853703  
rs9323304:57712482:A:C ENSG00000070367  
rs7147218:57722057:T:G:ENSG00000070367 0.035322296 0.629866286  
0.568513848 0.558498626 0.069942274 0.813853703  
rs7147218:57722057:T:G ENSG00000070367  
rs10147752:57732270:A:G:ENSG00000070367 0.035322296 0.631133206  
0.568513848 0.558498626 0.069942274 0.813853703  
rs10147752:57732270:A:G ENSG00000070367  
rs4898929:ENSG00000070367 0.561476075 0.039514306 0.400191924  
0.197042097 0.9305498 0.369977602 rs4898929 ENSG00000070367  
rs6573144:57772968:A:G:ENSG00000070367 0.561202335 0.039514306  
0.400191924 0.197042097 0.9305498 0.374953256  
rs6573144:57772968:A:G ENSG00000070367  
rs10146535:57774291:C:G:ENSG00000070367 0.578959133 0.039514306  
0.626634581 0.493098162 0.9305498 0.682445152  
rs10146535:57774291:C:G ENSG00000070367  
rs10146846:57774721:A:G:ENSG00000070367 0.561173628 0.039514306  
0.398350929 0.226823504 0.924570959 0.401203391  
rs10146846:57774721:A:G ENSG00000070367  
rs4465520:57777207:G:A:ENSG00000070367 0.58925339 0.039514306  
0.618696386 0.37163762 0.864454465 0.813853703  
rs4465520:57777207:G:A ENSG00000070367  
rs71114129:61133161:ATG:A:ENSG00000020426 0.035322296 0.661628136  
0.054815691 0.401539023 0.300892226 0.761294408  
rs71114129:61133161:ATG:A ENSG00000020426  
rs61990855:78125855:C:T:ENSG00000239272 0.146129194 0.039514306  
0.568513848 0.263905944 0.603364769 0.813853703  
rs61990855:78125855:C:T ENSG00000239272  
14:78135510:CAA:C:ENSG00000239272 0.155490932 0.039514306 0.054815691  
0.263905944 0.388754065 0.813853703 14:78135510:CAA:C:ENSG00000239272  
rs61992869:78136458:G:A:ENSG00000239272 0.146968287 0.039514306  
0.609676623 0.276782326 0.647818531 0.813853703  
rs61992869:78136458:G:A ENSG00000239272  
rs80346581:78138187:T:C:ENSG00000239272 0.155490932 0.039514306  
0.054815691 0.263905944 0.410008196 0.813853703  
rs80346581:78138187:T:C ENSG00000239272  
rs4903628:78142964:A:G:ENSG00000239272 0.190392053 0.039514306  
0.054815691 0.314254491 0.519536868 0.813853703  
rs4903628:78142964:A:G ENSG00000239272

rs8014720:78146606:C:A:ENSG00000239272 0.190392053 0.039514306  
0.054815691 0.314254491 0.519536868 0.813853703  
rs8014720:78146606:C:A ENSG00000239272  
rs4899671:78153052:C:T:ENSG00000239272 0.155490932 0.039514306  
0.054815691 0.276782326 0.403448628 0.813853703  
rs4899671:78153052:C:T ENSG00000239272  
rs61992917:78154069:T:C:ENSG00000239272 0.132837758 0.039514306  
0.582677515 0.263905944 0.580298595 0.813853703  
rs61992917:78154069:T:C ENSG00000239272  
rs7147748:78154856:C:T:ENSG00000239272 0.146129194 0.039514306  
0.589831546 0.276782326 0.603364769 0.813853703  
rs7147748:78154856:C:T ENSG00000239272  
rs61992919:78156487:G:A:ENSG00000239272 0.146968287 0.039514306  
0.054815691 0.290136921 0.472198515 0.813853703  
rs61992919:78156487:G:A ENSG00000239272  
rs7143382:78157186:C:T:ENSG00000239272 0.175415731 0.039514306  
0.054815691 0.290136921 0.490050927 0.813853703  
rs7143382:78157186:C:T ENSG00000239272  
rs79133654:78158945:T:C:ENSG00000239272 0.146968287 0.039514306  
0.054815691 0.276782326 0.410008196 0.813853703  
rs79133654:78158945:T:C ENSG00000239272  
rs113912605:78166415:T:A:ENSG00000239272 0.060909118 0.039514306  
0.626634581 0.350892299 0.647818531 0.813853703  
rs113912605:78166415:T:A ENSG00000239272  
rs45611739:78187032:T:C:ENSG00000239272 0.146968287 0.039514306  
0.054815691 0.276782326 0.410008196 0.813853703  
rs45611739:78187032:T:C ENSG00000239272  
rs6574390:78193545:C:T:ENSG00000239272 0.146968287 0.039514306  
0.054815691 0.276782326 0.410008196 0.813853703  
rs6574390:78193545:C:T ENSG00000239272  
rs45519831:78203713:T:C:ENSG00000239272 0.146968287 0.039514306  
0.581240934 0.263905944 0.565674613 0.813853703  
rs45519831:78203713:T:C ENSG00000239272  
rs1030152:78206148:C:A:ENSG00000239272 0.155490932 0.039514306  
0.618696386 0.326422852 0.672672971 0.813853703  
rs1030152:78206148:C:A ENSG00000239272  
rs142051467:78208428:G:C:ENSG00000239272 0.035322296 0.039514306  
0.351078567 0.072575018 0.173591669 0.497503372  
rs142051467:78208428:G:C ENSG00000239272  
rs57654091:78210958:C:T:ENSG00000239272 0.146968287 0.039514306  
0.054815691 0.276782326 0.410008196 0.813853703  
rs57654091:78210958:C:T ENSG00000239272  
JHU\_14.78224363:ENSG00000239272 0.146968287 0.039514306 0.054815691  
0.276782326 0.410008196 0.813853703 JHU\_14.78224363 ENSG00000239272  
rs139185593:78226163:T:TA:ENSG00000239272 0.146968287 0.039514306  
0.593231314 0.276782326 0.603710229 0.813853703  
rs139185593:78226163:T:TA ENSG00000239272  
rs78518545:78252381:C:T:ENSG00000239272 0.155490932 0.039514306  
0.618696386 0.326422852 0.672672971 0.813853703  
rs78518545:78252381:C:T ENSG00000239272  
rs61990717:78268930:A:C:ENSG00000239272 0.146968287 0.039514306  
0.618696386 0.326422852 0.675380087 0.813853703  
rs61990717:78268930:A:C ENSG00000239272

rs115634906:78277759:A:C:ENSG00000239272 0.035322296 0.039514306  
0.090437058 0.072575018 0.112902598 0.108665807  
rs115634906:78277759:A:C ENSG00000239272  
rs2278314:ENSG00000259287 0.035322296 0.039514306 0.718826765  
0.072575018 0.148497947 0.431187426 rs2278314 ENSG00000259287  
rs7174516:34141310:T:C:ENSG00000259287 0.035322296 0.039514306  
0.762115044 0.072575018 0.069942274 0.401203391  
rs7174516:34141310:T:C ENSG00000259287  
rs7169684:34141327:A:G:ENSG00000259287 0.035322296 0.039514306  
0.763265946 0.072575018 0.069942274 0.401203391  
rs7169684:34141327:A:G ENSG00000259287  
rs11270611:34144264:A:ATTTGCTGAGGTTATTCTTC:ENSG00000259287  
0.035322296 0.039514306 0.801175004 0.123210094 0.173591669  
0.460921055 rs11270611:34144264:A:ATTTGCTGAGGTTATTCTTC  
ENSG00000259287  
rs11630104:34146324:C:G:ENSG00000259287 0.035322296 0.202241296  
0.828327833 0.385352708 0.460100455 0.80054243  
rs11630104:34146324:C:G ENSG00000259287  
rs11634201:34149446:T:C:ENSG00000259287 0.035322296 0.202241296  
0.828327833 0.333474506 0.410008196 0.783188262  
rs11634201:34149446:T:C ENSG00000259287  
rs61351846:34149452:CACCA:C:ENSG00000259287 0.035322296 0.189251465  
0.828327833 0.333474506 0.410008196 0.782163764  
rs61351846:34149452:CACCA:C ENSG00000259287  
rs375469840:34149457:GCAC:G:ENSG00000259287 0.035322296 0.189251465  
0.828327833 0.333474506 0.410008196 0.782163764  
rs375469840:34149457:GCAC:G ENSG00000259287  
rs144134586:34149461:C:T:ENSG00000259287 0.035322296 0.240653097  
0.828327833 0.37163762 0.490050927 0.786798608  
rs144134586:34149461:C:T ENSG00000259287  
rs8042944:34154687:T:C:ENSG00000259287 0.035322296 0.248891879  
0.767962809 0.333474506 0.498016841 0.776319597  
rs8042944:34154687:T:C ENSG00000259287  
rs891342:34173978:A:T:ENSG00000259287 0.035322296 0.248891879  
0.767962809 0.333474506 0.498016841 0.776319597 rs891342:34173978:A:T  
ENSG00000259287  
rs144257161:34186220:G:A:ENSG00000259287 0.035322296 0.396207958  
0.814800802 0.340834261 0.438540244 0.813853703  
rs144257161:34186220:G:A ENSG00000259287  
rs11629711:40853692:C:T:ENSG00000128891 0.035322296 0.568032122  
0.381585774 0.503364172 0.381322091 0.782163764  
rs11629711:40853692:C:T ENSG00000128891  
rs74632444:65729522:C:T:ENSG00000074621 0.100009087 0.039514306  
0.090437058 0.072575018 0.069942274 0.063994875  
rs74632444:65729522:C:T ENSG00000074621  
rs7179918:65730235:G:C:ENSG00000074621 0.100009087 0.039514306  
0.054815691 0.072575018 0.069942274 0.063994875  
rs7179918:65730235:G:C ENSG00000074621  
rs58686752:65731657:C:T:ENSG00000074621 0.081933656 0.039514306  
0.090437058 0.072575018 0.069942274 0.063994875  
rs58686752:65731657:C:T ENSG00000074621  
rs892651:65732920:G:A:ENSG00000074621 0.100009087 0.039514306  
0.054815691 0.072575018 0.069942274 0.063994875 rs892651:65732920:G:A  
ENSG00000074621

rs7178060:65735497:A:G:ENSG00000074621 0.100009087 0.039514306  
0.054815691 0.072575018 0.069942274 0.063994875  
rs7178060:65735497:A:G ENSG00000074621  
rs58506591:65739487:A:G:ENSG00000074621 0.100009087 0.039514306  
0.054815691 0.072575018 0.069942274 0.063994875  
rs58506591:65739487:A:G ENSG00000074621  
rs79730739:65742978:C:T:ENSG00000074621 0.060909118 0.039514306  
0.090437058 0.072575018 0.069942274 0.063994875  
rs79730739:65742978:C:T ENSG00000074621  
rs7178317:65744010:C:G:ENSG00000074621 0.035322296 0.039514306  
0.054815691 0.072575018 0.069942274 0.063994875  
rs7178317:65744010:C:G ENSG00000074621  
rs146315273:65750602:CTTT:C:ENSG00000074621 0.035322296 0.039514306  
0.054815691 0.072575018 0.069942274 0.063994875  
rs146315273:65750602:CTTT:C ENSG00000074621  
rs352470:65765149:A:G:ENSG00000074621 0.035322296 0.039514306  
0.054815691 0.072575018 0.069942274 0.063994875 rs352470:65765149:A:G  
ENSG00000074621  
rs150933386:65766292:A:G:ENSG00000074621 0.035322296 0.039514306  
0.054815691 0.072575018 0.069942274 0.063994875  
rs150933386:65766292:A:G ENSG00000074621  
rs7166973:65766893:A:C:ENSG00000074621 0.035322296 0.039514306  
0.054815691 0.072575018 0.069942274 0.063994875  
rs7166973:65766893:A:C ENSG00000074621  
rs80129848:65769314:G:A:ENSG00000074621 0.035322296 0.039514306  
0.054815691 0.072575018 0.069942274 0.063994875  
rs80129848:65769314:G:A ENSG00000074621  
rs146269890:65770706:C:T:ENSG00000074621 0.035322296 0.039514306  
0.054815691 0.072575018 0.069942274 0.063994875  
rs146269890:65770706:C:T ENSG00000074621  
rs389377:65771454:T:A:ENSG00000074621 0.035322296 0.039514306  
0.054815691 0.072575018 0.069942274 0.063994875 rs389377:65771454:T:A  
ENSG00000074621  
rs78660811:65771545:T:C:ENSG00000074621 0.035322296 0.039514306  
0.054815691 0.072575018 0.069942274 0.063994875  
rs78660811:65771545:T:C ENSG00000074621  
rs386739:65772158:T:C:ENSG00000074621 0.035322296 0.039514306  
0.054815691 0.072575018 0.069942274 0.063994875 rs386739:65772158:T:C  
ENSG00000074621  
rs352461:65772698:T:C:ENSG00000074621 0.035322296 0.174910011  
0.054815691 0.072575018 0.069942274 0.063994875 rs352461:65772698:T:C  
ENSG00000074621  
rs352459:65773405:A:G:ENSG00000074621 0.035322296 0.039514306  
0.054815691 0.072575018 0.069942274 0.063994875 rs352459:65773405:A:G  
ENSG00000074621  
rs144248686:65774370:G:A:ENSG00000074621 0.035322296 0.039514306  
0.054815691 0.072575018 0.069942274 0.063994875  
rs144248686:65774370:G:A ENSG00000074621  
rs352457:65777205:G:A:ENSG00000074621 0.035322296 0.174910011  
0.054815691 0.072575018 0.069942274 0.063994875 rs352457:65777205:G:A  
ENSG00000074621  
rs144530655:65779117:T:C:ENSG00000074621 0.035322296 0.039514306  
0.054815691 0.072575018 0.069942274 0.063994875  
rs144530655:65779117:T:C ENSG00000074621

rs78122233:65781291:G:A:ENSG00000074621 0.035322296 0.039514306  
0.054815691 0.072575018 0.069942274 0.063994875  
rs78122233:65781291:G:A ENSG00000074621  
rs137885667:65782040:G:A:ENSG00000074621 0.035322296 0.039514306  
0.054815691 0.072575018 0.069942274 0.063994875  
rs137885667:65782040:G:A ENSG00000074621  
rs58891728:65784107:G:T:ENSG00000074621 0.035322296 0.039514306  
0.054815691 0.072575018 0.069942274 0.063994875  
rs58891728:65784107:G:T ENSG00000074621  
rs148948226:65784224:C:T:ENSG00000074621 0.035322296 0.039514306  
0.054815691 0.072575018 0.069942274 0.063994875  
rs148948226:65784224:C:T ENSG00000074621  
rs114242275:65784607:G:T:ENSG00000074621 0.035322296 0.039514306  
0.054815691 0.072575018 0.069942274 0.063994875  
rs114242275:65784607:G:T ENSG00000074621  
rs620188:65785277:T:A:ENSG00000074621 0.035322296 0.110495165  
0.054815691 0.072575018 0.069942274 0.063994875 rs620188:65785277:T:A  
ENSG00000074621  
rs610683:65785420:T:C:ENSG00000074621 0.035322296 0.110495165  
0.054815691 0.072575018 0.069942274 0.063994875 rs610683:65785420:T:C  
ENSG00000074621  
rs140160070:65786784:C:G:ENSG00000074621 0.035322296 0.039514306  
0.054815691 0.072575018 0.069942274 0.063994875  
rs140160070:65786784:C:G ENSG00000074621  
rs145340349:65789423:T:C:ENSG00000074621 0.035322296 0.039514306  
0.054815691 0.072575018 0.069942274 0.063994875  
rs145340349:65789423:T:C ENSG00000074621  
rs115499592:65789521:G:A:ENSG00000074621 0.035322296 0.039514306  
0.054815691 0.072575018 0.069942274 0.063994875  
rs115499592:65789521:G:A ENSG00000074621  
rs138305134:65793497:G:A:ENSG00000074621 0.035322296 0.039514306  
0.054815691 0.072575018 0.069942274 0.063994875  
rs138305134:65793497:G:A ENSG00000074621  
rs143050071:65796293:T:G:ENSG00000074621 0.035322296 0.039514306  
0.054815691 0.072575018 0.069942274 0.063994875  
rs143050071:65796293:T:G ENSG00000074621  
rs115612979:65796399:C:T:ENSG00000074621 0.035322296 0.039514306  
0.054815691 0.072575018 0.069942274 0.063994875  
rs115612979:65796399:C:T ENSG00000074621  
rs139283067:65796443:G:A:ENSG00000074621 0.035322296 0.039514306  
0.054815691 0.072575018 0.069942274 0.063994875  
rs139283067:65796443:G:A ENSG00000074621  
rs116152077:65796557:C:T:ENSG00000074621 0.035322296 0.039514306  
0.054815691 0.072575018 0.069942274 0.063994875  
rs116152077:65796557:C:T ENSG00000074621  
rs150649020:65798584:T:G:ENSG00000074621 0.035322296 0.039514306  
0.054815691 0.072575018 0.069942274 0.063994875  
rs150649020:65798584:T:G ENSG00000074621  
rs7166386:65801863:T:C:ENSG00000074621 0.035322296 0.039514306  
0.054815691 0.072575018 0.069942274 0.063994875  
rs7166386:65801863:T:C ENSG00000074621  
rs61261367:65802179:T:G:ENSG00000074621 0.035322296 0.039514306  
0.054815691 0.072575018 0.069942274 0.063994875  
rs61261367:65802179:T:G ENSG00000074621

rs352475:65805638:G:A:ENSG00000074621 0.035322296 0.110495165  
0.054815691 0.072575018 0.069942274 0.063994875 rs352475:65805638:G:A  
ENSG00000074621

rs10581611:65806077:CTAA:C:ENSG00000074621 0.035322296 0.110495165  
0.054815691 0.072575018 0.069942274 0.063994875  
rs10581611:65806077:CTAA:C ENSG00000074621

rs138825157:65807137:C:T:ENSG00000074621 0.035322296 0.039514306  
0.054815691 0.072575018 0.069942274 0.063994875  
rs138825157:65807137:C:T ENSG00000074621

rs352471:65807558:C:G:ENSG00000074621 0.035322296 0.257351931  
0.054815691 0.072575018 0.069942274 0.063994875 rs352471:65807558:C:G  
ENSG00000074621

rs75156244:65808387:G:C:ENSG00000074621 0.035322296 0.039514306  
0.054815691 0.072575018 0.069942274 0.063994875  
rs75156244:65808387:G:C ENSG00000074621

rs75220880:65809918:C:T:ENSG00000074621 0.035322296 0.039514306  
0.054815691 0.072575018 0.069942274 0.063994875  
rs75220880:65809918:C:T ENSG00000074621

rs398157:65810413:C:T:ENSG00000074621 0.035322296 0.110495165  
0.054815691 0.072575018 0.069942274 0.063994875 rs398157:65810413:C:T  
ENSG00000074621

rs115493777:65813027:C:T:ENSG00000074621 0.035322296 0.039514306  
0.054815691 0.072575018 0.069942274 0.063994875  
rs115493777:65813027:C:T ENSG00000074621

rs375004:65813652:G:A:ENSG00000074621 0.035322296 0.110495165  
0.054815691 0.072575018 0.069942274 0.063994875 rs375004:65813652:G:A  
ENSG00000074621

rs399741:65813689:A:T:ENSG00000074621 0.035322296 0.110495165  
0.054815691 0.072575018 0.069942274 0.063994875 rs399741:65813689:A:T  
ENSG00000074621

rs71409143:65815642:G:T:ENSG00000074621 0.035322296 0.089622533  
0.054815691 0.072575018 0.069942274 0.063994875  
rs71409143:65815642:G:T ENSG00000074621

rs183902769:65815761:G:A:ENSG00000074621 0.035322296 0.039514306  
0.054815691 0.072575018 0.069942274 0.063994875  
rs183902769:65815761:G:A ENSG00000074621

rs192707620:65815832:G:A:ENSG00000074621 0.035322296 0.039514306  
0.054815691 0.072575018 0.069942274 0.063994875  
rs192707620:65815832:G:A ENSG00000074621

rs2437046:65822175:A:C:ENSG00000074621 0.035322296 0.257351931  
0.054815691 0.072575018 0.069942274 0.063994875  
rs2437046:65822175:A:C ENSG00000074621

rs422390:65822823:C:G:ENSG00000074621 0.035322296 0.202241296  
0.054815691 0.072575018 0.069942274 0.063994875 rs422390:65822823:C:G  
ENSG00000074621

rs79212417:65823783:C:G:ENSG00000074621 0.035322296 0.039514306  
0.054815691 0.072575018 0.069942274 0.063994875  
rs79212417:65823783:C:G ENSG00000074621

rs77713110:65827474:C:T:ENSG00000074621 0.035322296 0.039514306  
0.054815691 0.072575018 0.069942274 0.063994875  
rs77713110:65827474:C:T ENSG00000074621

rs8031064:65834031:T:G:ENSG00000074621 0.035322296 0.039514306  
0.054815691 0.072575018 0.069942274 0.063994875  
rs8031064:65834031:T:G ENSG00000074621



rs149382453:65834304:C:T:ENSG00000074621 0.035322296 0.039514306  
0.054815691 0.072575018 0.069942274 0.063994875  
rs149382453:65834304:C:T ENSG00000074621  
rs140759299:65836389:C:T:ENSG00000074621 0.035322296 0.039514306  
0.054815691 0.072575018 0.069942274 0.063994875  
rs140759299:65836389:C:T ENSG00000074621  
rs649438:65838082:C:T:ENSG00000074621 0.035322296 0.290843861  
0.054815691 0.072575018 0.069942274 0.063994875 rs649438:65838082:C:T  
ENSG00000074621  
rs8032937:65838303:C:T:ENSG00000074621 0.035322296 0.039514306  
0.054815691 0.072575018 0.069942274 0.063994875  
rs8032937:65838303:C:T ENSG00000074621  
rs77106195:65838642:A:G:ENSG00000074621 0.035322296 0.039514306  
0.054815691 0.072575018 0.069942274 0.063994875  
rs77106195:65838642:A:G ENSG00000074621  
rs77291118:65840043:A:G:ENSG00000074621 0.035322296 0.039514306  
0.054815691 0.072575018 0.069942274 0.063994875  
rs77291118:65840043:A:G ENSG00000074621  
rs4496075:65841104:A:G:ENSG00000074621 0.060909118 0.039514306  
0.090437058 0.072575018 0.069942274 0.063994875  
rs4496075:65841104:A:G ENSG00000074621  
rs1003104:65843154:G:A:ENSG00000074621 0.035322296 0.039514306  
0.054815691 0.072575018 0.069942274 0.063994875  
rs1003104:65843154:G:A ENSG00000074621  
rs1003103:65843333:C:T:ENSG00000074621 0.035322296 0.039514306  
0.054815691 0.072575018 0.069942274 0.063994875  
rs1003103:65843333:C:T ENSG00000074621  
rs145069801:65845025:T:A:ENSG00000074621 0.035322296 0.039514306  
0.054815691 0.072575018 0.069942274 0.063994875  
rs145069801:65845025:T:A ENSG00000074621  
rs78172739:65847502:A:G:ENSG00000074621 0.035322296 0.039514306  
0.054815691 0.072575018 0.069942274 0.063994875  
rs78172739:65847502:A:G ENSG00000074621  
rs114597995:65848669:A:T:ENSG00000074621 0.035322296 0.039514306  
0.054815691 0.072575018 0.069942274 0.063994875  
rs114597995:65848669:A:T ENSG00000074621  
rs6494525:ENSG00000074621 0.035322296 0.039514306 0.054815691  
0.072575018 0.069942274 0.063994875 rs6494525 ENSG00000074621  
rs7164255:65850729:C:T:ENSG00000074621 0.035322296 0.039514306  
0.054815691 0.072575018 0.069942274 0.063994875  
rs7164255:65850729:C:T ENSG00000074621  
rs370784977:65854743:CTG:C:ENSG00000074621 0.035322296 0.039514306  
0.054815691 0.072575018 0.069942274 0.063994875  
rs370784977:65854743:CTG:C ENSG00000074621  
rs146124680:65856266:C:A:ENSG00000074621 0.035322296 0.039514306  
0.054815691 0.072575018 0.069942274 0.063994875  
rs146124680:65856266:C:A ENSG00000074621  
rs11484:ENSG00000074621 0.035322296 0.174910011 0.090437058  
0.072575018 0.069942274 0.063994875 rs11484 ENSG00000074621  
rs2454451:76861461:G:T:ENSG00000140386 0.357981916 0.039514306  
0.054815691 0.072575018 0.538368464 0.308405655  
rs2454451:76861461:G:T ENSG00000140386

rs2404736:76875943:T:C:ENSG00000140386 0.035322296 0.661270668  
0.679533134 0.491850645 0.85654698 0.511827661  
rs2404736:76875943:T:C:ENSG00000140386  
rs12591557:78811732:A:G:ENSG00000169684 0.418609874 0.039514306  
0.828327833 0.558498626 0.617728871 0.749650459  
rs12591557:78811732:A:G ENSG00000169684  
15:78865425-T-C:ENSG00000169684 0.200359533 0.039514306 0.679533134  
0.481611326 0.112902598 0.282646046 15:78865425-T-C ENSG00000169684  
rs2456019:78868489:T:G:ENSG00000169684 0.035322296 0.039514306  
0.717524365 0.424824518 0.069942274 0.108665807  
rs2456019:78868489:T:G:ENSG00000169684  
rs692780:78876505:C:G:ENSG00000169684 0.035322296 0.039514306  
0.718826765 0.406267798 0.069942274 0.108665807 rs692780:78876505:C:G  
ENSG00000169684  
rs514743:78884227:T:A:ENSG00000169684 0.100009087 0.039514306  
0.767163632 0.385352708 0.251839208 0.225997306 rs514743:78884227:T:A  
ENSG00000169684  
rs7182583:78899210:G:C:ENSG00000169684 0.035322296 0.039514306  
0.618696386 0.559048117 0.069942274 0.295623551  
rs7182583:78899210:G:C:ENSG00000169684  
rs7496812:79222924:C:T:ENSG00000103811 0.260395929 0.039514306  
0.828327833 0.709051726 0.734695661 0.785329549  
rs7496812:79222924:C:T:ENSG00000103811  
rs2289699:79223681:G:A:ENSG00000103811 0.260395929 0.039514306  
0.828327833 0.709051726 0.734695661 0.785329549  
rs2289699:79223681:G:A:ENSG00000103811  
rs34778376:79231180:GT:G:ENSG00000103811 0.22504072 0.039514306  
0.827435543 0.739334999 0.729195963 0.789755639  
rs34778376:79231180:GT:G ENSG00000103811  
rs28655102:79232700:C:T:ENSG00000103811 0.228236375 0.039514306  
0.828327833 0.74296186 0.730942663 0.790913456  
rs28655102:79232700:C:T ENSG00000103811  
rs28595235:101103927:A:G:ENSG00000270127 0.035322296 0.110495165  
0.054815691 0.165229468 0.173591669 0.063994875  
rs28595235:101103927:A:G ENSG00000270127  
rs61562452:101104500:C:G:ENSG00000270127 0.035322296 0.12731097  
0.054815691 0.165229468 0.198669295 0.063994875  
rs61562452:101104500:C:G ENSG00000270127  
rs6598355:101105579:T:A:ENSG00000270127 0.035322296 0.110495165  
0.054815691 0.165229468 0.173591669 0.063994875  
rs6598355:101105579:T:A ENSG00000270127  
rs12593204:101105809:G:A:ENSG00000270127 0.035322296 0.110495165  
0.054815691 0.165229468 0.173591669 0.063994875  
rs12593204:101105809:G:A ENSG00000270127  
rs12593224:101105897:G:T:ENSG00000270127 0.035322296 0.110495165  
0.054815691 0.165229468 0.173591669 0.063994875  
rs12593224:101105897:G:T ENSG00000270127  
rs11630819:101106830:A:T:ENSG00000270127 0.035322296 0.110495165  
0.054815691 0.165229468 0.173591669 0.063994875  
rs11630819:101106830:A:T ENSG00000270127  
rs28668152:101107057:T:C:ENSG00000270127 0.035322296 0.110495165  
0.054815691 0.165229468 0.173591669 0.063994875  
rs28668152:101107057:T:C ENSG00000270127

rs8029435:101107362:G:A:ENSG00000270127 0.035322296 0.110495165  
0.054815691 0.165229468 0.173591669 0.063994875  
rs8029435:101107362:G:A ENSG00000270127  
rs28497202:101108908:C:T:ENSG00000270127 0.546606023 0.039514306  
0.054815691 0.424824518 0.787720344 0.390568128  
rs28497202:101108908:C:T ENSG00000270127  
rs238683:1879065:A:T:ENSG00000180185 0.295612735 0.039514306  
0.649343605 0.072575018 0.069942274 0.174366738 rs238683:1879065:A:T  
ENSG00000180185  
rs344373:1924350:A:G:ENSG00000180185 0.035322296 0.654488658  
0.828327833 0.539448558 0.705614658 0.813853703 rs344373:1924350:A:G  
ENSG00000180185  
rs9928549:20597512:T:G:ENSG00000260201 0.035322296 0.110495165  
0.054815691 0.244282474 0.069942274 0.063994875  
rs9928549:20597512:T:G ENSG00000260201  
rs11860659:20597873:A:G:ENSG00000260201 0.035322296 0.209793344  
0.054815691 0.314254491 0.069942274 0.063994875  
rs11860659:20597873:A:G ENSG00000260201  
rs30012:23420943:A:G:ENSG00000166847 0.035322296 0.651399716 0.7518355  
0.558498626 0.814700007 0.813853703 rs30012:23420943:A:G  
ENSG00000166847  
rs30010:23422658:G:C:ENSG00000166847 0.035322296 0.640315667  
0.730770151 0.558498626 0.787720344 0.813853703 rs30010:23422658:G:C  
ENSG00000166847  
rs40817:23422672:C:G:ENSG00000166847 0.035322296 0.642113186  
0.731144493 0.558498626 0.771563861 0.813853703 rs40817:23422672:C:G  
ENSG00000166847  
rs250579:23425585:A:G:ENSG00000166847 0.035322296 0.64771467  
0.753805316 0.558498626 0.805872786 0.813853703 rs250579:23425585:A:G  
ENSG00000166847  
rs11861636:23439997:T:C:ENSG00000166847 0.035322296 0.651227337  
0.756966764 0.565024683 0.811065379 0.813853703  
rs11861636:23439997:T:C ENSG00000166847  
rs11074562:23499700:G:A:ENSG00000166847 0.035322296 0.42813865 0.33856507  
0.744127379 0.198669295 0.74623957 rs11074562:23499700:G:A  
ENSG00000166847  
rs4968011:23500558:T:C:ENSG00000103356 0.31683404 0.039514306  
0.121437838 0.385352708 0.198669295 0.414364157  
rs4968011:23500558:T:C ENSG00000103356  
rs7202661:23504041:A:C:ENSG00000103356 0.285198641 0.039514306  
0.184980376 0.533143145 0.340307796 0.347302535  
rs7202661:23504041:A:C ENSG00000103356  
rs7203580:23504248:G:A:ENSG00000103356 0.305615864 0.039514306  
0.121437838 0.350892299 0.251839208 0.201281701  
rs7203580:23504248:G:A ENSG00000103356  
rs59785925:23508360:C:CTTGAGGCTGA:ENSG00000103356 0.271758927  
0.039514306 0.165546404 0.496527133 0.251839208 0.269135872  
rs59785925:23508360:C:CTTGAGGCTGA ENSG00000103356  
rs2040574:23510326:A:G:ENSG00000103356 0.271758927 0.039514306  
0.165546404 0.496527133 0.251839208 0.269135872  
rs2040574:23510326:A:G ENSG00000103356  
rs4968013:23512592:G:T:ENSG00000103356 0.271758927 0.039514306  
0.165546404 0.496527133 0.251839208 0.269135872  
rs4968013:23512592:G:T ENSG00000103356

rs5816214:23518214:T:TC:ENSG00000103356 0.271758927 0.039514306  
0.184980376 0.49621531 0.279727316 0.269135872  
rs5816214:23518214:T:TC ENSG00000103356  
rs3785408:23519986:T:C:ENSG00000103356 0.271758927 0.039514306  
0.184980376 0.49621531 0.266901314 0.269135872  
rs3785408:23519986:T:C ENSG00000103356  
rs2285521:23521780:C:T:ENSG00000103356 0.271758927 0.039514306  
0.165546404 0.491850645 0.251839208 0.269135872  
rs2285521:23521780:C:T ENSG00000103356  
rs35947720:23522639:ATT:A:ENSG00000103356 0.271758927 0.039514306  
0.184980376 0.491850645 0.251839208 0.295623551  
rs35947720:23522639:ATT:A ENSG00000103356  
rs112294873:23523296:T:TCAGCTGTCTA:ENSG00000103356 0.271758927  
0.039514306 0.165546404 0.491850645 0.251839208 0.269135872  
rs112294873:23523296:T:TCAGCTGTCTA ENSG00000103356  
rs7186729:23526094:T:C:ENSG00000103356 0.271758927 0.039514306 0.20393713  
0.49621531 0.266901314 0.269135872 rs7186729:23526094:T:C  
ENSG00000103356  
rs11300207:23535156:CT:C:ENSG00000103356 0.239371492 0.039514306  
0.184980376 0.491850645 0.218559406 0.225997306  
rs11300207:23535156:CT:C ENSG00000103356  
rs1468138:23535680:A:C:ENSG00000103356 0.439359535 0.039514306  
0.360243455 0.445043357 0.595947504 0.640308963  
rs1468138:23535680:A:C ENSG00000103356  
rs6497670:23536366:T:C:ENSG00000103356 0.439359535 0.039514306  
0.351078567 0.445043357 0.594105975 0.640308963  
rs6497670:23536366:T:C ENSG00000103356  
rs55859005:23537431:CTTT:C:ENSG00000103356 0.320653282 0.039514306  
0.090437058 0.290136921 0.266901314 0.24867752  
rs55859005:23537431:CTTT:C ENSG00000103356  
rs7405243:23537678:T:C:ENSG00000103356 0.297292124 0.039514306  
0.054815691 0.276782326 0.251839208 0.225997306  
rs7405243:23537678:T:C ENSG00000103356  
rs8046051:23538666:G:A:ENSG00000103356 0.297292124 0.039514306  
0.054815691 0.276782326 0.251839208 0.225997306  
rs8046051:23538666:G:A ENSG00000103356  
rs4968018:23543131:G:A:ENSG00000103356 0.322853095 0.039514306  
0.360243455 0.558498626 0.410008196 0.419171564  
rs4968018:23543131:G:A ENSG00000103356  
rs6497672:23544295:G:A:ENSG00000103356 0.325001177 0.039514306  
0.360243455 0.558498626 0.403448628 0.414364157  
rs6497672:23544295:G:A ENSG00000103356  
rs4527034:31131614:A:G:ENSG00000151006 0.520295402 0.039514306 0.33856507  
0.617868032 0.218559406 0.063994875 rs4527034:31131614:A:G  
ENSG00000151006  
rs34087264:70323126:C:T:ENSG00000261777 0.271758927 0.039514306 0.20393713  
0.689549544 0.690981753 0.813853703 rs34087264:70323126:C:T  
ENSG00000261777  
rs28733806:70335323:C:G:ENSG00000261777 0.271758927 0.039514306 0.20393713  
0.691044883 0.690981753 0.813853703 rs28733806:70335323:C:G  
ENSG00000261777  
rs11075762:70372339:C:T:ENSG00000261777 0.146129194 0.039514306  
0.054815691 0.579004696 0.288162171 0.583309947  
rs11075762:70372339:C:T ENSG00000261777

rs12325412:70646728:G:A:ENSG00000157353 0.035322296 0.272806835  
0.222302049 0.589583216 0.363699827 0.282646046  
rs12325412:70646728:G:A ENSG00000157353  
rs74435681:70663852:T:C:ENSG00000157353 0.288194279 0.039514306  
0.255451763 0.613788364 0.70366248 0.75395128  
rs74435681:70663852:T:C ENSG00000157353  
rs112410113:85042561:G:C:ENSG00000153786 0.47030173 0.039514306  
0.645109255 0.558498626 0.724883143 0.308405655  
rs112410113:85042561:G:C ENSG00000153786  
rs8191470:88878176:C:A:ENSG00000198931 0.035322296 0.039514306  
0.054815691 0.072575018 0.069942274 0.063994875  
rs8191470:88878176:C:A ENSG00000198931  
rs77639392:88928599:C:G:ENSG00000198931 0.035322296 0.110495165  
0.054815691 0.072575018 0.069942274 0.063994875  
rs77639392:88928599:C:G ENSG00000198931  
rs115461902:88932284:T:G:ENSG00000198931 0.035322296 0.039514306  
0.054815691 0.072575018 0.069942274 0.063994875  
rs115461902:88932284:T:G ENSG00000198931  
rs4782465:89163502:T:C:ENSG00000176715 0.100009087 0.039514306  
0.604215794 0.667818093 0.917665418 0.818977027  
rs4782465:89163502:T:C ENSG00000176715  
rs11863384:89163839:A:C:ENSG00000176715 0.060909118 0.039514306  
0.579532834 0.647697296 0.904520929 0.813853703  
rs11863384:89163839:A:C ENSG00000176715  
rs11863385:89163846:A:C:ENSG00000176715 0.146968287 0.039514306 0.59267775  
0.655092891 0.90539517 0.813853703 rs11863385:89163846:A:C  
ENSG00000176715  
rs11076763:89164081:G:C:ENSG00000176715 0.035322296 0.039514306  
0.370396184 0.491850645 0.776230732 0.813853703  
rs11076763:89164081:G:C ENSG00000176715  
rs35044159:89164181:GA:G:ENSG00000176715 0.146968287 0.039514306  
0.59267775 0.653716589 0.905346124 0.814472792  
rs35044159:89164181:GA:G ENSG00000176715  
rs11076764:89164207:G:A:ENSG00000176715 0.146968287 0.039514306 0.59267775  
0.653716589 0.905346124 0.814472792 rs11076764:89164207:G:A  
ENSG00000176715  
rs11076765:89164208:C:T:ENSG00000176715 0.146968287 0.039514306 0.59267775  
0.653716589 0.905346124 0.814472792 rs11076765:89164208:C:T  
ENSG00000176715  
rs4782464:89164429:C:T:ENSG00000176715 0.100009087 0.039514306  
0.599411169 0.665448201 0.916868319 0.819500231  
rs4782464:89164429:C:T ENSG00000176715  
rs4782331:89164540:G:A:ENSG00000176715 0.060909118 0.039514306  
0.576180386 0.647697296 0.901523284 0.813853703  
rs4782331:89164540:G:A ENSG00000176715  
rs36099289:89164974:C:A:ENSG00000176715 0.035322296 0.039514306  
0.400191924 0.197042097 0.173591669 0.813853703  
rs36099289:89164974:C:A ENSG00000176715  
rs7499425:89165575:G:C:ENSG00000176715 0.081933656 0.039514306  
0.582677515 0.649756756 0.90377607 0.813853703  
rs7499425:89165575:G:C ENSG00000176715  
rs59788479:89165748:T:C:ENSG00000176715 0.146968287 0.039514306  
0.592067279 0.6524842 0.901523284 0.816484635  
rs59788479:89165748:T:C ENSG00000176715

rs8053006:89166048:G:A:ENSG00000176715 0.146968287 0.039514306  
0.592067279 0.6524842 0.901523284 0.816484635  
rs8053006:89166048:G:A ENSG00000176715  
rs35740910:89166386:CAA:C:ENSG00000176715 0.100009087 0.039514306  
0.59267775 0.656357343 0.909167584 0.821642632  
rs35740910:89166386:CAA:C ENSG00000176715  
rs8046141:89166424:T:C:ENSG00000176715 0.100009087 0.039514306 0.59267775  
0.661219565 0.910108997 0.821642632 rs8046141:89166424:T:C  
ENSG00000176715  
rs56386090:89166669:C:T:ENSG00000176715 0.117465891 0.039514306  
0.594989053 0.646725407 0.903252402 0.813853703  
rs56386090:89166669:C:T ENSG00000176715  
rs12449019:89166807:A:G:ENSG00000176715 0.146968287 0.039514306  
0.589831546 0.651493039 0.899479198 0.817686609  
rs12449019:89166807:A:G ENSG00000176715  
rs7195892:89166941:C:T:ENSG00000176715 0.100009087 0.039514306 0.59267775  
0.658786134 0.909167584 0.821642632 rs7195892:89166941:C:T  
ENSG00000176715  
rs57558972:89167066:C:G:ENSG00000176715 0.155490932 0.039514306  
0.593231314 0.664826765 0.90539517 0.813853703  
rs57558972:89167066:C:G ENSG00000176715  
rs6500526:89167395:C:T:ENSG00000176715 0.146968287 0.039514306  
0.674868706 0.754737609 0.931119464 0.813853703  
rs6500526:89167395:C:T ENSG00000176715  
rs7193255:89167404:T:C:ENSG00000176715 0.200359533 0.039514306  
0.679533134 0.754218833 0.934841002 0.813853703  
rs7193255:89167404:T:C ENSG00000176715  
rs6500529:89167458:C:A:ENSG00000176715 0.162871942 0.039514306  
0.667476732 0.751091602 0.9305498 0.813853703  
rs6500529:89167458:C:A ENSG00000176715  
rs8060043:89167792:C:T:ENSG00000176715 0.060909118 0.039514306  
0.568513848 0.624518909 0.87814657 0.814472792  
rs8060043:89167792:C:T ENSG00000176715  
rs71387680:89168723:C:T:ENSG00000176715 0.035322296 0.039514306  
0.419451892 0.326422852 0.266901314 0.801880573  
rs71387680:89168723:C:T ENSG00000176715  
rs7194635:89168725:A:G:ENSG00000176715 0.297292124 0.039514306  
0.731144493 0.757711539 0.920076405 0.813853703  
rs7194635:89168725:A:G ENSG00000176715  
rs7200676:ENSG00000176715 0.291376195 0.039514306 0.713452083  
0.760145967 0.90539517 0.813853703 rs7200676 ENSG00000176715  
rs4782458:89168935:G:C:ENSG00000176715 0.297292124 0.039514306  
0.726206733 0.757155561 0.917401119 0.813853703  
rs4782458:89168935:G:C ENSG00000176715  
rs4782457:89168981:T:C:ENSG00000176715 0.297292124 0.039514306  
0.726206733 0.757155561 0.917401119 0.813853703  
rs4782457:89168981:T:C ENSG00000176715  
rs4782456:89169205:C:G:ENSG00000176715 0.297292124 0.039514306  
0.728288658 0.757711539 0.91897099 0.813853703  
rs4782456:89169205:C:G ENSG00000176715  
rs4782455:89169312:T:C:ENSG00000176715 0.297292124 0.039514306  
0.726206733 0.757155561 0.917401119 0.813853703  
rs4782455:89169312:T:C ENSG00000176715



rs4782454:89170027:T:C:ENSG00000176715 0.297292124 0.039514306  
0.727343376 0.757155561 0.917665418 0.813853703  
rs4782454:89170027:T:C ENSG00000176715  
rs4782453:89170047:T:C:ENSG00000176715 0.304041304 0.039514306  
0.736223303 0.761207831 0.927817937 0.813853703  
rs4782453:89170047:T:C ENSG00000176715  
rs4782330:89170064:C:T:ENSG00000176715 0.304041304 0.039514306  
0.736223303 0.761207831 0.927817937 0.813853703  
rs4782330:89170064:C:T ENSG00000176715  
rs7184784:89170171:T:C:ENSG00000176715 0.290380371 0.039514306  
0.718826765 0.75652549 0.920590777 0.813853703  
rs7184784:89170171:T:C ENSG00000176715  
rs8044145:89170679:A:G:ENSG00000176715 0.297292124 0.039514306  
0.727343376 0.757384683 0.917666866 0.813853703  
rs8044145:89170679:A:G ENSG00000176715  
rs8044192:89170777:A:G:ENSG00000176715 0.297292124 0.039514306  
0.727343376 0.757384683 0.917666866 0.813853703  
rs8044192:89170777:A:G ENSG00000176715  
rs8056878:89170856:C:T:ENSG00000176715 0.297292124 0.039514306  
0.727343376 0.757384683 0.917666866 0.813853703  
rs8056878:89170856:C:T ENSG00000176715  
rs8056882:89170861:C:T:ENSG00000176715 0.297292124 0.039514306  
0.727343376 0.757384683 0.917666866 0.813853703  
rs8056882:89170861:C:T ENSG00000176715  
rs8061488:89170974:G:T:ENSG00000176715 0.295612735 0.039514306  
0.726206733 0.758135828 0.914508095 0.813853703  
rs8061488:89170974:G:T ENSG00000176715  
rs8057217:89171018:C:G:ENSG00000176715 0.295612735 0.039514306  
0.726206733 0.758135828 0.914508095 0.813853703  
rs8057217:89171018:C:G ENSG00000176715  
rs11640002:89171384:G:A:ENSG00000176715 0.391536163 0.039514306  
0.828327833 0.663069216 0.54593522 0.813853703  
rs11640002:89171384:G:A ENSG00000176715  
rs12447910:89171389:T:C:ENSG00000176715 0.297292124 0.039514306  
0.727343376 0.757384683 0.917666866 0.813853703  
rs12447910:89171389:T:C ENSG00000176715  
rs12446096:89171442:C:T:ENSG00000176715 0.28152348 0.039514306 0.70008691  
0.752110581 0.917135423 0.813853703 rs12446096:89171442:C:T  
ENSG00000176715  
rs7190776:89171544:A:G:ENSG00000176715 0.295612735 0.039514306  
0.726206733 0.758783797 0.914508095 0.813853703  
rs7190776:89171544:A:G ENSG00000176715  
rs11076766:89171646:C:T:ENSG00000176715 0.297292124 0.039514306  
0.726206733 0.764321564 0.920590777 0.813853703  
rs11076766:89171646:C:T ENSG00000176715  
rs7405366:89172122:C:A:ENSG00000176715 0.297292124 0.039514306  
0.728288658 0.757384683 0.918894926 0.813853703  
rs7405366:89172122:C:A ENSG00000176715  
rs28538054:89173583:C:G:ENSG00000176715 0.146968287 0.039514306  
0.552896362 0.577552537 0.525520858 0.813853703  
rs28538054:89173583:C:G ENSG00000176715  
rs8044701:89176878:G:A:ENSG00000176715 0.243759522 0.039514306 0.63054575  
0.720146805 0.846769489 0.837651503 rs8044701:89176878:G:A  
ENSG00000176715

rs12918883:89176957:G:A:ENSG00000176715 0.196140407 0.039514306  
0.638829519 0.492233123 0.371793022 0.832178722  
rs12918883:89176957:G:A ENSG00000176715  
rs4782450:89177506:G:T:ENSG00000176715 0.205647498 0.039514306  
0.612361159 0.679809501 0.730942663 0.813853703  
rs4782450:89177506:G:T ENSG00000176715  
rs4782329:89178839:T:C:ENSG00000176715 0.155490932 0.039514306  
0.568513848 0.612613944 0.565674613 0.823519159  
rs4782329:89178839:T:C ENSG00000176715  
rs7186059:89179874:A:G:ENSG00000176715 0.155490932 0.039514306  
0.593231314 0.679809501 0.701945326 0.813853703  
rs7186059:89179874:A:G ENSG00000176715  
rs4782447:89181890:T:C:ENSG00000176715 0.175415731 0.039514306  
0.618696386 0.611407088 0.63278855 0.813853703  
rs4782447:89181890:T:C ENSG00000176715  
rs4782446:89182104:A:G:ENSG00000176715 0.175415731 0.039514306  
0.618696386 0.611407088 0.63278855 0.813853703  
rs4782446:89182104:A:G ENSG00000176715  
rs4782328:89182218:A:G:ENSG00000176715 0.200359533 0.039514306  
0.611290285 0.589583216 0.574209974 0.813853703  
rs4782328:89182218:A:G ENSG00000176715  
rs8052780:89182926:A:G:ENSG00000176715 0.196140407 0.039514306  
0.625050185 0.621111272 0.688090257 0.82406001  
rs8052780:89182926:A:G ENSG00000176715  
rs8053537:89183197:G:A:ENSG00000176715 0.169284753 0.039514306  
0.618696386 0.608765679 0.641673925 0.813853703  
rs8053537:89183197:G:A ENSG00000176715  
rs8057399:89183217:A:G:ENSG00000176715 0.169284753 0.039514306  
0.618696386 0.608765679 0.641673925 0.813853703  
rs8057399:89183217:A:G ENSG00000176715  
rs9938518:89183780:A:G:ENSG00000176715 0.117465891 0.039514306  
0.545428271 0.520505218 0.288162171 0.813853703  
rs9938518:89183780:A:G ENSG00000176715  
rs4782327:89184135:G:C:ENSG00000176715 0.175415731 0.039514306  
0.593231314 0.628695369 0.63278855 0.82972085  
rs4782327:89184135:G:C ENSG00000176715  
rs34573246:89187764:T:G:ENSG00000176715 0.18193752 0.039514306  
0.579382297 0.559048117 0.54593522 0.813853703  
rs34573246:89187764:T:G ENSG00000176715  
rs11645063:89187809:T:C:ENSG00000176715 0.18193752 0.039514306  
0.579382297 0.559048117 0.54593522 0.813853703  
rs11645063:89187809:T:C ENSG00000176715  
rs60524679:89192519:T:C:ENSG00000176715 0.205647498 0.039514306  
0.568513848 0.406267798 0.438540244 0.813789279  
rs60524679:89192519:T:C ENSG00000176715  
rs59346323:89192902:C:G:ENSG00000176715 0.060909118 0.039514306  
0.503583077 0.197042097 0.173591669 0.784142169  
rs59346323:89192902:C:G ENSG00000176715  
rs76924932:89194594:G:C:ENSG00000176715 0.132837758 0.039514306  
0.492105461 0.333474506 0.288162171 0.772415663  
rs76924932:89194594:G:C ENSG00000176715  
rs74036126:89195932:T:G:ENSG00000176715 0.146968287 0.039514306  
0.485354668 0.326422852 0.288162171 0.781735686  
rs74036126:89195932:T:G ENSG00000176715

rs2349284:16758619:A:G:ENSG00000205312 0.035322296 0.189251465  
0.470302738 0.660426802 0.237095457 0.201281701  
rs2349284:16758619:A:G ENSG00000205312  
rs2349287:16762638:A:C:ENSG00000205312 0.035322296 0.189251465  
0.470302738 0.660426802 0.237095457 0.201281701  
rs2349287:16762638:A:C ENSG00000205312  
rs112853808:16763280:C:T:ENSG00000205312 0.035322296 0.189251465  
0.466752146 0.660426802 0.237095457 0.201281701  
rs112853808:16763280:C:T ENSG00000205312  
rs111383287:16763685:T:A:ENSG00000205312 0.035322296 0.189251465  
0.466752146 0.660426802 0.237095457 0.201281701  
rs111383287:16763685:T:A ENSG00000205312  
rs11651251:16764499:A:G:ENSG00000205312 0.035322296 0.189251465  
0.466752146 0.660426802 0.237095457 0.201281701  
rs11651251:16764499:A:G ENSG00000205312  
rs11658859:16775339:G:T:ENSG00000205312 0.035322296 0.189251465  
0.458471274 0.662029528 0.237095457 0.201281701  
rs11658859:16775339:G:T ENSG00000205312  
rs117121559:16777657:G:A:ENSG00000205312 0.035322296 0.145249232  
0.400191924 0.670181625 0.148497947 0.108665807  
rs117121559:16777657:G:A ENSG00000205312  
rs17793114:16781145:A:G:ENSG00000205312 0.035322296 0.189251465  
0.458471274 0.663069216 0.237095457 0.201281701  
rs17793114:16781145:A:G ENSG00000205312  
rs11654224:16783999:G:A:ENSG00000205312 0.035322296 0.334648487  
0.419451892 0.720678952 0.381322091 0.24867752  
rs11654224:16783999:G:A ENSG00000205312  
rs142594862:16788546:G:C:ENSG00000205312 0.035322296 0.334648487  
0.419451892 0.720321711 0.381322091 0.24867752  
rs142594862:16788546:G:C ENSG00000205312  
rs11656859:16791960:C:A:ENSG00000205312 0.035322296 0.33968813 0.42239248  
0.720321711 0.381322091 0.24867752 rs11656859:16791960:C:A  
ENSG00000205312  
rs34032548:16798206:A:AT:ENSG00000205312 0.035322296 0.546437754  
0.406502841 0.751922411 0.758499809 0.431187426  
rs34032548:16798206:A:AT ENSG00000205312  
17:16801712:T:G:ENSG00000205312 0.035322296 0.33968813 0.42239248  
0.720321711 0.381322091 0.24867752 17:16801712:T:G ENSG00000205312  
rs11657586:16804523:G:T:ENSG00000205312 0.035322296 0.33968813 0.42239248  
0.720321711 0.381322091 0.24867752 rs11657586:16804523:G:T  
ENSG00000205312  
rs144299169:16805798:C:A:ENSG00000205312 0.035322296 0.281740211  
0.360243455 0.721730419 0.300892226 0.201281701  
rs144299169:16805798:C:A ENSG00000205312  
rs11651972:16807364:A:C:ENSG00000205312 0.035322296 0.33968813 0.42239248  
0.720321711 0.381322091 0.24867752 rs11651972:16807364:A:C  
ENSG00000205312  
rs78936092:16810284:G:T:ENSG00000205312 0.035322296 0.33968813 0.42239248  
0.720321711 0.381322091 0.24867752 rs78936092:16810284:G:T  
ENSG00000205312  
rs11658549:16810959:A:G:ENSG00000205312 0.035322296 0.290843861 0.33856507  
0.723369143 0.288162171 0.140342165 rs11658549:16810959:A:G  
ENSG00000205312

rs113982579:38294446:C:G:ENSG00000266208 0.060909118 0.039514306  
0.579382297 0.072575018 0.069942274 0.063994875  
rs113982579:38294446:C:G ENSG00000266208  
rs111792830:38294504:C:T:ENSG00000266208 0.100009087 0.039514306  
0.605977561 0.072575018 0.069942274 0.063994875  
rs111792830:38294504:C:T ENSG00000266208  
rs113161637:38297544:T:TCATCTATTTTC:ENSG00000266208 0.132837758  
0.039514306 0.605977561 0.072575018 0.148497947 0.063994875  
rs113161637:38297544:T:TCATCTATTTTC ENSG00000266208  
rs41283417:38297716:T:C:ENSG00000266208 0.035322296 0.039514306  
0.560108139 0.072575018 0.069942274 0.063994875  
rs41283417:38297716:T:C ENSG00000266208  
rs144521793:38301114:G:A:ENSG00000266208 0.117465891 0.039514306  
0.619854485 0.072575018 0.069942274 0.063994875  
rs144521793:38301114:G:A ENSG00000266208  
rs9898500:38305381:G:A:ENSG00000266208 0.035322296 0.039514306  
0.568513848 0.072575018 0.069942274 0.063994875  
rs9898500:38305381:G:A ENSG00000266208  
rs112581084:38307008:T:TG:ENSG00000266208 0.035322296 0.039514306  
0.560108139 0.072575018 0.069942274 0.063994875  
rs112581084:38307008:T:TG ENSG00000266208  
17:38307010:T:A:ENSG00000266208 0.035322296 0.039514306 0.560108139  
0.072575018 0.069942274 0.063994875 17:38307010:T:A ENSG00000266208  
rs111385527:38310200:G:A:ENSG00000266208 0.035322296 0.039514306  
0.560108139 0.072575018 0.069942274 0.063994875  
rs111385527:38310200:G:A ENSG00000266208  
rs111398422:38313286:AC:A:ENSG00000266208 0.060909118 0.039514306  
0.608285859 0.072575018 0.069942274 0.063994875  
rs111398422:38313286:AC:A ENSG00000266208  
rs113041992:38320590:C:T:ENSG00000266208 0.035322296 0.039514306  
0.560108139 0.072575018 0.069942274 0.063994875  
rs113041992:38320590:C:T ENSG00000266208  
rs112500395:38324782:AT:A:ENSG00000266208 0.035322296 0.039514306  
0.562861286 0.072575018 0.069942274 0.063994875  
rs112500395:38324782:AT:A ENSG00000266208  
rs9899956:40032384:C:T:ENSG00000141698 0.561476075 0.039514306  
0.786960718 0.561168554 0.92199093 0.813853703  
rs9899956:40032384:C:T ENSG00000141698  
rs11652377:41212169:C:T:ENSG00000267681 0.035322296 0.447397811  
0.370396184 0.558498626 0.493250562 0.063994875  
rs11652377:41212169:C:T ENSG00000267681  
rs8176263:41214209:CAA:C:ENSG00000267681 0.035322296 0.455090809  
0.351078567 0.560086389 0.54593522 0.108665807  
rs8176263:41214209:CAA:C ENSG00000267681  
rs8176234:41219780:T:C:ENSG00000267681 0.035322296 0.661628136  
0.621329859 0.450346002 0.54593522 0.358316132  
rs8176234:41219780:T:C ENSG00000267681  
rs8176233:41219804:T:C:ENSG00000267681 0.035322296 0.661628136  
0.621329859 0.450346002 0.54593522 0.358316132  
rs8176233:41219804:T:C ENSG00000267681  
rs8176231:41220223:A:G:ENSG00000267681 0.035322296 0.661628136  
0.621329859 0.450346002 0.54593522 0.358316132  
rs8176231:41220223:A:G ENSG00000267681

exm1326521:ENSG00000267681 0.035322296 0.661628136 0.621329859  
0.450346002 0.54593522 0.358316132 exm1326521 ENSG00000267681  
rs8176214:41225839:T:C:ENSG00000267681 0.035322296 0.661628136  
0.621329859 0.450346002 0.54593522 0.358316132  
rs8176214:41225839:T:C ENSG00000267681  
rs8176091:41270277:C:T:ENSG00000267681 0.035322296 0.382430049  
0.283332252 0.558498626 0.388754065 0.108665807  
rs8176091:41270277:C:T ENSG00000267681  
rs8176087:41270666:C:A:ENSG00000267681 0.035322296 0.382430049  
0.283332252 0.558498626 0.388754065 0.108665807  
rs8176087:41270666:C:A ENSG00000267681  
rs34942571:41273379:G:C:ENSG00000267681 0.035322296 0.382430049  
0.283332252 0.558498626 0.388754065 0.108665807  
rs34942571:41273379:G:C ENSG00000267681  
rs149141411:41275081:G:GA:ENSG00000267681 0.035322296 0.407321946  
0.400191924 0.530641947 0.498016841 0.140342165  
rs149141411:41275081:G:GA ENSG00000267681  
rs8176083:41275151:G:C:ENSG00000267681 0.035322296 0.467084083  
0.390230616 0.558498626 0.493250562 0.063994875  
rs8176083:41275151:G:C ENSG00000267681  
rs35981166:41279837:C:A:ENSG00000267681 0.035322296 0.461224231 0.42239248  
0.558498626 0.504458419 0.108665807 rs35981166:41279837:C:A  
ENSG00000267681  
rs1877837:41281754:G:A:ENSG00000267681 0.035322296 0.371735893  
0.269469279 0.558498626 0.395007577 0.108665807  
rs1877837:41281754:G:A ENSG00000267681  
rs11650848:41284699:A:G:ENSG00000267681 0.035322296 0.382430049  
0.269469279 0.558498626 0.395007577 0.108665807  
rs11650848:41284699:A:G ENSG00000267681  
rs11651905:41284792:T:A:ENSG00000267681 0.035322296 0.38687185  
0.269469279 0.558498626 0.395007577 0.108665807  
rs11651905:41284792:T:A ENSG00000267681  
rs35286533:41287315:G:GC:ENSG00000267681 0.035322296 0.455090809  
0.33856507 0.559048117 0.559581427 0.108665807  
rs35286533:41287315:G:GC ENSG00000267681  
rs33961729:41287924:C:A:ENSG00000267681 0.035322296 0.378243214  
0.269469279 0.558498626 0.395007577 0.108665807  
rs33961729:41287924:C:A ENSG00000267681  
rs11657835:41291953:C:G:ENSG00000267681 0.035322296 0.364271932  
0.283332252 0.544839734 0.371793022 0.063994875  
rs11657835:41291953:C:G ENSG00000267681  
rs33933224:41298434:T:C:ENSG00000267681 0.035322296 0.359391426  
0.269469279 0.548833684 0.363699827 0.063994875  
rs33933224:41298434:T:C ENSG00000267681  
rs4792979:41298515:C:T:ENSG00000267681 0.035322296 0.364271932  
0.269469279 0.549689754 0.371793022 0.063994875  
rs4792979:41298515:C:T ENSG00000267681  
rs12951574:41299589:C:T:ENSG00000267681 0.035322296 0.661594802  
0.568513848 0.491850645 0.603364769 0.453831125  
rs12951574:41299589:C:T ENSG00000267681  
rs4793212:41302750:T:C:ENSG00000267681 0.035322296 0.354347171  
0.269469279 0.549689754 0.363699827 0.063994875  
rs4793212:41302750:T:C ENSG00000267681

rs34534709:41302940:C:G:ENSG00000267681 0.035322296 0.354347171  
0.269469279 0.549689754 0.363699827 0.063994875  
rs34534709:41302940:C:G ENSG00000267681  
rs2037075:41305826:G:T:ENSG00000267681 0.035322296 0.507089732  
0.492105461 0.617124137 0.585329409 0.282646046  
rs2037075:41305826:G:T ENSG00000267681  
rs35646478:41306697:TTAAG:T:ENSG00000267681 0.035322296 0.371735893  
0.351078567 0.558498626 0.403448628 0.063994875  
rs35646478:41306697:TTAAG:T ENSG00000267681  
rs5018132:41307702:G:C:ENSG00000267681 0.035322296 0.440891171  
0.429802874 0.558498626 0.493250562 0.063994875  
rs5018132:41307702:G:C ENSG00000267681  
rs7501753:41307703:C:T:ENSG00000267681 0.035322296 0.469499546  
0.419451892 0.558498626 0.54593522 0.140342165  
rs7501753:41307703:C:T ENSG00000267681  
rs34120358:41309752:G:T:ENSG00000267681 0.035322296 0.476967581  
0.406502841 0.558498626 0.538368464 0.174366738  
rs34120358:41309752:G:T ENSG00000267681  
rs34365396:41325020:T:C:ENSG00000267681 0.035322296 0.49581991  
0.458471274 0.577552537 0.54593522 0.295623551  
rs34365396:41325020:T:C ENSG00000267681  
rs12940037:41325342:A:G:ENSG00000267681 0.035322296 0.488175625  
0.443593462 0.576920785 0.54593522 0.295623551  
rs12940037:41325342:A:G ENSG00000267681  
rs11650132:41326087:T:G:ENSG00000267681 0.035322296 0.476967581  
0.429802874 0.579004696 0.519536868 0.282646046  
rs11650132:41326087:T:G ENSG00000267681  
rs11654731:41326940:G:A:ENSG00000267681 0.035322296 0.486304322  
0.458471274 0.577552537 0.532319281 0.295623551  
rs11654731:41326940:G:A ENSG00000267681  
rs11656945:41330265:A:G:ENSG00000267681 0.035322296 0.475271007  
0.443593462 0.577552537 0.532319281 0.282646046  
rs11656945:41330265:A:G ENSG00000267681  
rs12944430:41330820:C:G:ENSG00000267681 0.035322296 0.505984373  
0.458471274 0.604627172 0.54593522 0.282646046  
rs12944430:41330820:C:G ENSG00000267681  
rs11653460:41331306:C:T:ENSG00000267681 0.035322296 0.496502649  
0.458471274 0.602462075 0.54593522 0.282646046  
rs11653460:41331306:C:T ENSG00000267681  
rs11650913:41331597:T:C:ENSG00000267681 0.035322296 0.496502649  
0.454299825 0.603611735 0.54593522 0.282646046  
rs11650913:41331597:T:C ENSG00000267681  
rs12936831:41331816:C:T:ENSG00000267681 0.035322296 0.505984373  
0.454299825 0.602462075 0.54593522 0.282646046  
rs12936831:41331816:C:T ENSG00000267681  
rs11658499:41334749:C:T:ENSG00000267681 0.035322296 0.463260354  
0.406502841 0.572952418 0.519536868 0.24867752  
rs11658499:41334749:C:T ENSG00000267681  
rs77259033:41351400:T:A:ENSG00000267681 0.035322296 0.378243214  
0.297111757 0.491850645 0.340307796 0.063994875  
rs77259033:41351400:T:A ENSG00000267681  
rs2306829:41353806:C:T:ENSG00000267681 0.035322296 0.467084083  
0.381585774 0.558498626 0.477032507 0.063994875  
rs2306829:41353806:C:T ENSG00000267681



rs71379211:41356947:A:G:ENSG00000267681 0.035322296 0.461224231  
0.370396184 0.519043541 0.381322091 0.063994875  
rs71379211:41356947:A:G ENSG00000267681  
rs35221180:41358152:G:A:ENSG00000267681 0.035322296 0.359391426  
0.184980376 0.450346002 0.266901314 0.063994875  
rs35221180:41358152:G:A ENSG00000267681  
rs13851:41371844:A:G:ENSG00000267681 0.035322296 0.359391426  
0.165546404 0.419678998 0.218559406 0.063994875 rs13851:41371844:A:G  
ENSG00000267681  
rs1807433:41373899:C:G:ENSG00000267681 0.035322296 0.651399716  
0.324917292 0.301206855 0.340307796 0.295623551  
rs1807433:41373899:C:G ENSG00000267681  
rs372125809:41374780:GT:G:ENSG00000267681 0.035322296 0.632005909  
0.450702715 0.301206855 0.279727316 0.369977602  
rs372125809:41374780:GT:G ENSG00000267681  
17:41374793:GT:G:ENSG00000267681 0.035322296 0.632005909 0.454299825  
0.301206855 0.279727316 0.369977602 17:41374793:GT:G ENSG00000267681  
rs111274735:41375509:T:A:ENSG00000267681 0.035322296 0.594149718  
0.390230616 0.340834261 0.340307796 0.414364157  
rs111274735:41375509:T:A ENSG00000267681  
rs17600371:41375555:T:G:ENSG00000267681 0.035322296 0.38687185  
0.165546404 0.438119062 0.251839208 0.063994875  
rs17600371:41375555:T:G ENSG00000267681  
rs1133320:41375597:A:G:ENSG00000267681 0.035322296 0.631133206  
0.454299825 0.290136921 0.266901314 0.369977602  
rs1133320:41375597:A:G ENSG00000267681  
rs3744244:41376104:C:T:ENSG00000267681 0.035322296 0.631133206  
0.454299825 0.290136921 0.266901314 0.369977602  
rs3744244:41376104:C:T ENSG00000267681  
rs35960318:41377185:C:T:ENSG00000267681 0.035322296 0.632005909  
0.454299825 0.290136921 0.266901314 0.369977602  
rs35960318:41377185:C:T ENSG00000267681  
rs113488312:41377739:T:A:ENSG00000267681 0.035322296 0.396207958  
0.184980376 0.445043357 0.266901314 0.063994875  
rs113488312:41377739:T:A ENSG00000267681  
rs112666191:41377741:T:A:ENSG00000267681 0.035322296 0.391301538  
0.165546404 0.445043357 0.266901314 0.063994875  
rs112666191:41377741:T:A ENSG00000267681  
rs7406399:41377871:C:T:ENSG00000267681 0.035322296 0.396207958  
0.184980376 0.445043357 0.266901314 0.063994875  
rs7406399:41377871:C:T ENSG00000267681  
rs7406411:41377969:C:T:ENSG00000267681 0.035322296 0.632005909  
0.454299825 0.290136921 0.266901314 0.369977602  
rs7406411:41377969:C:T ENSG00000267681  
rs71361513:41378392:AAAG:A:ENSG00000267681 0.035322296 0.469499546  
0.184980376 0.197042097 0.069942274 0.108665807  
rs71361513:41378392:AAAG:A ENSG00000267681  
rs34094168:41379112:A:G:ENSG00000267681 0.035322296 0.631133206  
0.454299825 0.290136921 0.266901314 0.369977602  
rs34094168:41379112:A:G ENSG00000267681  
rs71274038:41380756:C:T:ENSG00000267681 0.035322296 0.375516094  
0.165546404 0.429269101 0.237095457 0.063994875  
rs71274038:41380756:C:T ENSG00000267681

rs201687968:41383726:C:CTGTG:ENSG00000267681 0.035322296 0.422190018  
0.20393713 0.455203609 0.251839208 0.063994875  
rs201687968:41383726:C:CTGTG:ENSG00000267681  
rs113379364:41387871:G:A:ENSG00000267681 0.035322296 0.447397811  
0.310525978 0.491850645 0.347424829 0.108665807  
rs113379364:41387871:G:A:ENSG00000267681  
rs1574329:41401582:A:G:ENSG00000267681 0.035322296 0.476967581  
0.310525978 0.500294942 0.388754065 0.063994875  
rs1574329:41401582:A:G:ENSG00000267681  
rs111784069:41401730:G:A:ENSG00000267681 0.035322296 0.469861597  
0.324917292 0.509242766 0.371793022 0.108665807  
rs111784069:41401730:G:A:ENSG00000267681  
rs34977165:41403329:C:G:ENSG00000267681 0.035322296 0.442358463 0.14398786  
0.491850645 0.218559406 0.108665807 rs34977165:41403329:C:G  
ENSG00000267681  
rs2343818:41409774:G:A:ENSG00000267681 0.035322296 0.445133661 0.14398786  
0.49621531 0.237095457 0.108665807 rs2343818:41409774:G:A  
ENSG00000267681  
rs36114164:41410460:C:T:ENSG00000267681 0.035322296 0.472808011  
0.283332252 0.546358114 0.381322091 0.108665807  
rs36114164:41410460:C:T:ENSG00000267681  
rs71190320:41414025:A:G:ENSG00000267681 0.035322296 0.695919225  
0.400191924 0.491850645 0.395007577 0.414364157  
rs71190320:41414025:A:G:ENSG00000267681  
rs4346244:41414293:G:A:ENSG00000267681 0.035322296 0.69497631  
0.269469279 0.447551187 0.288162171 0.308405655  
rs4346244:41414293:G:A:ENSG00000267681  
rs4600503:41414324:C:G:ENSG00000267681 0.035322296 0.69497631  
0.184980376 0.379688866 0.218559406 0.225997306  
rs4600503:41414324:C:G:ENSG00000267681  
rs4352088:41414679:A:G:ENSG00000267681 0.035322296 0.33968813  
0.054815691 0.486971863 0.069942274 0.063994875  
rs4352088:41414679:A:G:ENSG00000267681  
rs9675035:41415016:A:T:ENSG00000267681 0.035322296 0.697946469  
0.406502841 0.491850645 0.403448628 0.401203391  
rs9675035:41415016:A:T:ENSG00000267681  
rs9675026:41415023:T:C:ENSG00000267681 0.035322296 0.69714067  
0.406502841 0.503364172 0.403448628 0.382106273  
rs9675026:41415023:T:C:ENSG00000267681  
rs12951008:41417382:A:G:ENSG00000267681 0.035322296 0.698760559  
0.411358711 0.509242766 0.403448628 0.414364157  
rs12951008:41417382:A:G:ENSG00000267681  
rs11654051:41419656:C:T:ENSG00000267681 0.035322296 0.422190018  
0.297111757 0.507376693 0.410008196 0.108665807  
rs11654051:41419656:C:T:ENSG00000267681  
rs11653303:41420143:G:T:ENSG00000267681 0.035322296 0.51143522  
0.419451892 0.558498626 0.480692872 0.269135872  
rs11653303:41420143:G:T:ENSG00000267681  
rs56729776:41422131:C:T:ENSG00000267681 0.035322296 0.240653097  
0.054815691 0.385352708 0.148497947 0.063994875  
rs56729776:41422131:C:T:ENSG00000267681  
rs35956818:41422985:T:C:ENSG00000267681 0.035322296 0.69714067  
0.184980376 0.395341642 0.218559406 0.140342165  
rs35956818:41422985:T:C:ENSG00000267681

rs34610160:41423017:G:A:ENSG00000267681 0.035322296 0.42813865  
0.310525978 0.519043541 0.403448628 0.140342165  
rs34610160:41423017:G:A ENSG00000267681  
JHU\_17.43487573:ENSG00000214401 0.23524183 0.039514306 0.429802874  
0.764321564 0.824032297 0.813853703 JHU\_17.43487573 ENSG00000214401  
rs12936645:43495420:A:T:ENSG00000214401 0.162871942 0.039514306  
0.454299825 0.775056511 0.861392531 0.813853703  
rs12936645:43495420:A:T ENSG00000214401  
17:43666385:C:T:ENSG00000238083 0.035322296 0.626739008 0.419451892  
0.333474506 0.266901314 0.813853703 17:43666385:C:T ENSG00000238083  
17:43666820:G:A:ENSG00000238083 0.035322296 0.627222552 0.42239248  
0.333474506 0.266901314 0.813853703 17:43666820:G:A ENSG00000238083  
rs376183404:43667413:CTT:C:ENSG00000238083 0.035322296 0.039514306  
0.360243455 0.072575018 0.198669295 0.687592023  
rs376183404:43667413:CTT:C ENSG00000238083  
17:43667537:C:T:ENSG00000238083 0.035322296 0.627222552 0.42239248  
0.333474506 0.266901314 0.813853703 17:43667537:C:T ENSG00000238083  
17:43669879:A:G:ENSG00000238083 0.035322296 0.039514306 0.165546404  
0.072575018 0.251839208 0.619162849 17:43669879:A:G ENSG00000238083  
17:43681149:C:CA:ENSG00000238083 0.035322296 0.624712816 0.419451892  
0.340834261 0.266901314 0.813853703 17:43681149:C:CA ENSG00000238083  
rs113155081:43752078:A:AC:ENSG00000238083 0.035322296 0.651399716  
0.429802874 0.399004389 0.355219989 0.813853703  
rs113155081:43752078:A:AC ENSG00000238083  
rs62055663:43753454:A:G:ENSG00000238083 0.035322296 0.651399716  
0.429802874 0.399004389 0.355219989 0.813853703  
rs62055663:43753454:A:G ENSG00000238083  
rs62055665:43754505:A:C:ENSG00000238083 0.035322296 0.651399716  
0.429802874 0.399004389 0.355219989 0.813853703  
rs62055665:43754505:A:C ENSG00000238083  
rs62055689:43754569:G:A:ENSG00000238083 0.035322296 0.651399716  
0.429802874 0.399004389 0.355219989 0.813853703  
rs62055689:43754569:G:A ENSG00000238083  
rs62055692:43754909:A:G:ENSG00000238083 0.035322296 0.651399716  
0.429802874 0.399004389 0.355219989 0.813853703  
rs62055692:43754909:A:G ENSG00000238083  
17:43756171:A:AAAAC:ENSG00000238083 0.035322296 0.651399716  
0.429802874 0.399004389 0.355219989 0.813853703 17:43756171:A:AAAAC  
ENSG00000238083  
rs757503:43756466:T:C:ENSG00000238083 0.035322296 0.651399716  
0.429802874 0.399004389 0.355219989 0.813853703 rs757503:43756466:T:C  
ENSG00000238083  
17:43757776:T:C:ENSG00000238083 0.035322296 0.651399716 0.429802874  
0.399004389 0.355219989 0.813853703 17:43757776:T:C ENSG00000238083  
17:43757777:C:T:ENSG00000238083 0.035322296 0.651399716 0.429802874  
0.399004389 0.355219989 0.813853703 17:43757777:C:T ENSG00000238083  
rs112155389:43758078:G:A:ENSG00000238083 0.035322296 0.651399716  
0.429802874 0.399004389 0.355219989 0.813853703  
rs112155389:43758078:G:A ENSG00000238083  
17:43758116:AAAAG:A:ENSG00000238083 0.035322296 0.651399716  
0.429802874 0.399004389 0.355219989 0.813853703 17:43758116:AAAAG:A  
ENSG00000238083

rs62055696:43758125:A:G:ENSG00000238083 0.035322296 0.651399716  
0.429802874 0.399004389 0.355219989 0.813853703  
rs62055696:43758125:A:G ENSG00000238083  
rs62055701:43758787:G:A:ENSG00000238083 0.035322296 0.651399716  
0.429802874 0.399004389 0.355219989 0.813853703  
rs62055701:43758787:G:A ENSG00000238083  
rs62055702:43758790:C:T:ENSG00000238083 0.035322296 0.651399716  
0.429802874 0.399004389 0.355219989 0.813853703  
rs62055702:43758790:C:T ENSG00000238083  
rs76333921:43759426:C:T:ENSG00000238083 0.035322296 0.651399716  
0.429802874 0.399004389 0.355219989 0.813853703  
rs76333921:43759426:C:T ENSG00000238083  
rs56400821:43760080:C:A:ENSG00000238083 0.035322296 0.651399716  
0.429802874 0.399004389 0.355219989 0.813853703  
rs56400821:43760080:C:A ENSG00000238083  
rs112169475:43760192:A:G:ENSG00000238083 0.035322296 0.651399716  
0.429802874 0.399004389 0.355219989 0.813853703  
rs112169475:43760192:A:G ENSG00000238083  
17:43760374:A:AT:ENSG00000238083 0.035322296 0.651399716 0.42786084  
0.37163762 0.288162171 0.813853703 17:43760374:A:AT ENSG00000238083  
rs17761124:43760516:A:T:ENSG00000238083 0.035322296 0.651399716  
0.429802874 0.399004389 0.355219989 0.813853703  
rs17761124:43760516:A:T ENSG00000238083  
rs62055705:43760599:A:C:ENSG00000238083 0.035322296 0.651399716  
0.429802874 0.399004389 0.355219989 0.813853703  
rs62055705:43760599:A:C ENSG00000238083  
rs62055706:43760685:T:C:ENSG00000238083 0.035322296 0.651399716  
0.429802874 0.399004389 0.355219989 0.813853703  
rs62055706:43760685:T:C ENSG00000238083  
rs75115093:43761381:A:G:ENSG00000238083 0.035322296 0.651399716  
0.429802874 0.399004389 0.355219989 0.813853703  
rs75115093:43761381:A:G ENSG00000238083  
rs62055707:43761482:T:C:ENSG00000238083 0.035322296 0.651399716  
0.429802874 0.399004389 0.355219989 0.813853703  
rs62055707:43761482:T:C ENSG00000238083  
rs2049515:43761856:C:T:ENSG00000238083 0.035322296 0.651399716  
0.429802874 0.399004389 0.355219989 0.813853703  
rs2049515:43761856:C:T ENSG00000238083  
rs62055708:43761974:C:A:ENSG00000238083 0.035322296 0.651399716  
0.429802874 0.399004389 0.355219989 0.813853703  
rs62055708:43761974:C:A ENSG00000238083  
rs76927677:43761985:A:T:ENSG00000238083 0.035322296 0.651399716  
0.429802874 0.399004389 0.355219989 0.813853703  
rs76927677:43761985:A:T ENSG00000238083  
rs62055709:43762429:C:T:ENSG00000238083 0.035322296 0.651399716  
0.429802874 0.399004389 0.355219989 0.813853703  
rs62055709:43762429:C:T ENSG00000238083  
rs62055710:43762537:T:A:ENSG00000238083 0.035322296 0.651399716  
0.429802874 0.399004389 0.355219989 0.813853703  
rs62055710:43762537:T:A ENSG00000238083  
rs17688002:43762594:A:T:ENSG00000238083 0.035322296 0.651399716  
0.429802874 0.399004389 0.355219989 0.813853703  
rs17688002:43762594:A:T ENSG00000238083

rs17688032:43763202:G:A:ENSG00000238083 0.035322296 0.651399716  
0.429802874 0.399004389 0.355219989 0.813853703  
rs17688032:43763202:G:A ENSG00000238083  
rs17688068:43763935:A:G:ENSG00000238083 0.035322296 0.651399716  
0.429802874 0.399004389 0.355219989 0.813853703  
rs17688068:43763935:A:G ENSG00000238083  
rs199798669:43764027:GGCCGAGGTGAGAGGCT:G:ENSG00000238083 0.035322296  
0.651399716 0.429802874 0.399004389 0.355219989 0.813853703  
rs199798669:43764027:GGCCGAGGTGAGAGGCT:G ENSG00000238083  
rs62055712:43764565:A:G:ENSG00000238083 0.035322296 0.651399716  
0.429802874 0.399004389 0.355219989 0.813853703  
rs62055712:43764565:A:G ENSG00000238083  
rs62055713:43764685:C:T:ENSG00000238083 0.035322296 0.651399716  
0.429802874 0.399004389 0.355219989 0.813853703  
rs62055713:43764685:C:T ENSG00000238083  
rs62055714:43764796:G:T:ENSG00000238083 0.035322296 0.651399716  
0.429802874 0.399004389 0.355219989 0.813853703  
rs62055714:43764796:G:T ENSG00000238083  
rs17688126:43765080:A:G:ENSG00000238083 0.035322296 0.651227337  
0.429802874 0.395341642 0.355219989 0.813853703  
rs17688126:43765080:A:G ENSG00000238083  
rs77310586:43765381:G:C:ENSG00000238083 0.035322296 0.651227337  
0.429802874 0.390584104 0.355219989 0.813853703  
rs77310586:43765381:G:C ENSG00000238083  
rs17689824:43904397:C:T:ENSG00000238083 0.035322296 0.651399716  
0.485354668 0.429269101 0.403448628 0.813853703  
rs17689824:43904397:C:T ENSG00000238083  
rs62057153:43904528:T:C:ENSG00000238083 0.035322296 0.651399716  
0.492105461 0.435112224 0.429827068 0.813853703  
rs62057153:43904528:T:C ENSG00000238083  
rs17763086:43905481:T:G:ENSG00000238083 0.035322296 0.667212307  
0.450702715 0.565024683 0.54593522 0.813853703  
rs17763086:43905481:T:G ENSG00000238083  
17:44013966:T:C:ENSG00000238083 0.035322296 0.651399716 0.5196698  
0.387628207 0.371793022 0.739809647 17:44013966:T:C ENSG00000238083  
rs62062287:44096541:T:G:ENSG00000238083 0.035322296 0.675994358  
0.450702715 0.519043541 0.690981753 0.775020218  
rs62062287:44096541:T:G ENSG00000238083  
rs66472415:44206455:G:GA:ENSG00000238083 0.035322296 0.407321946  
0.283332252 0.226823504 0.477032507 0.659336192  
rs66472415:44206455:G:GA ENSG00000238083  
17:44310961:A:AT:ENSG00000238083 0.035322296 0.682012197 0.283332252  
0.558498626 0.429827068 0.813853703 17:44310961:A:AT ENSG00000238083  
rs73311808:45316245:G:A:ENSG00000259207 0.035322296 0.12731097  
0.165546404 0.226823504 0.808377886 0.453831125  
rs73311808:45316245:G:A ENSG00000259207  
rs11868912:45359414:A:T:ENSG00000178852 0.398495813 0.039514306  
0.789231612 0.621111272 0.198669295 0.768929031  
rs11868912:45359414:A:T ENSG00000178852  
rs13306485:45361047:G:A:ENSG00000178852 0.351885919 0.039514306  
0.750174412 0.601101423 0.069942274 0.755308559  
rs13306485:45361047:G:A ENSG00000178852

rs73320494:45373571:T:C:ENSG00000178852 0.18193752 0.039514306  
0.429802874 0.340834261 0.069942274 0.726813924  
rs73320494:45373571:T:C ENSG00000178852  
rs11870252:45377825:T:C:ENSG00000178852 0.446625656 0.039514306  
0.679533134 0.498363812 0.538368464 0.840957308  
rs11870252:45377825:T:C ENSG00000178852  
rs11867192:45378468:G:A:ENSG00000178852 0.446625656 0.039514306  
0.679533134 0.498363812 0.538368464 0.840957308  
rs11867192:45378468:G:A ENSG00000178852  
rs55706706:45380570:C:T:ENSG00000178852 0.446625656 0.039514306  
0.679533134 0.500294942 0.538368464 0.840957308  
rs55706706:45380570:C:T ENSG00000178852  
rs11869835:45381823:G:T:ENSG00000178852 0.446625656 0.039514306  
0.679533134 0.500294942 0.544223189 0.840957308  
rs11869835:45381823:G:T ENSG00000178852  
rs11870781:45383295:C:T:ENSG00000178852 0.446625656 0.039514306  
0.679533134 0.503364172 0.544223189 0.840957308  
rs11870781:45383295:C:T ENSG00000178852  
rs17817829:53010381:T:G:ENSG00000166260 0.035322296 0.671714138  
0.528262409 0.197042097 0.636822477 0.813853703  
rs17817829:53010381:T:G ENSG00000166260  
rs11079141:53021790:G:A:ENSG00000166260 0.035322296 0.668532818  
0.601406435 0.263905944 0.610999891 0.813853703  
rs11079141:53021790:G:A ENSG00000166260  
rs12936375:53022866:G:T:ENSG00000166260 0.035322296 0.668532818  
0.618696386 0.276782326 0.690981753 0.813853703  
rs12936375:53022866:G:T ENSG00000166260  
rs11869726:53023489:A:G:ENSG00000166260 0.035322296 0.668532818  
0.599411169 0.263905944 0.610999891 0.813853703  
rs11869726:53023489:A:G ENSG00000166260  
rs4793782:53025342:C:T:ENSG00000166260 0.035322296 0.668532818  
0.618696386 0.276782326 0.690981753 0.813853703  
rs4793782:53025342:C:T ENSG00000166260  
rs34391032:53028683:C:T:ENSG00000166260 0.035322296 0.668532818  
0.618696386 0.276782326 0.690981753 0.813853703  
rs34391032:53028683:C:T ENSG00000166260  
rs34632315:53030668:G:T:ENSG00000166260 0.035322296 0.668532818  
0.599411169 0.263905944 0.610999891 0.813853703  
rs34632315:53030668:G:T ENSG00000166260  
rs2024465:53034652:T:C:ENSG00000166260 0.035322296 0.661628136  
0.542268712 0.072575018 0.490050927 0.793644504  
rs2024465:53034652:T:C ENSG00000166260  
rs57632493:53037489:C:T:ENSG00000166260 0.035322296 0.661628136  
0.571157005 0.263905944 0.585329409 0.813853703  
rs57632493:53037489:C:T ENSG00000166260  
rs60736080:53037609:C:A:ENSG00000166260 0.035322296 0.661628136  
0.571157005 0.263905944 0.585329409 0.813853703  
rs60736080:53037609:C:A ENSG00000166260  
rs1057980:53038783:G:A:ENSG00000166260 0.035322296 0.680193701  
0.411358711 0.123210094 0.595947504 0.813853703  
rs1057980:53038783:G:A ENSG00000166260  
rs35310805:53043117:G:A:ENSG00000166260 0.035322296 0.661471783  
0.536792521 0.072575018 0.480692872 0.79451053  
rs35310805:53043117:G:A ENSG00000166260



rs11869638:53043894:T:C:ENSG00000166260 0.035322296 0.655089161  
0.568513848 0.244282474 0.574209974 0.812790135  
rs11869638:53043894:T:C ENSG00000166260  
rs11872021:53043978:G:T:ENSG00000166260 0.035322296 0.654488658  
0.568513848 0.263905944 0.565674613 0.813853703  
rs11872021:53043978:G:T ENSG00000166260  
17:53045325-G-A:ENSG00000166260 0.035322296 0.591220107 0.370396184  
0.226823504 0.467095788 0.813853703 17:53045325-G-A ENSG00000166260  
rs8064882:53046209:C:T:ENSG00000166260 0.035322296 0.58760415  
0.222302049 0.072575018 0.311775972 0.813853703  
rs8064882:53046209:C:T ENSG00000166260  
rs8072827:53073858:A:G:ENSG00000166260 0.035322296 0.628196016  
0.625050185 0.123210094 0.679445541 0.813853703  
rs8072827:53073858:A:G ENSG00000166260  
rs2787479:53100954:G:A:ENSG00000166260 0.035322296 0.58760415  
0.575705306 0.072575018 0.504458419 0.813853703  
rs2787479:53100954:G:A ENSG00000166260  
rs2541248:53135536:C:T:ENSG00000166260 0.035322296 0.604833185  
0.613735952 0.123210094 0.603710229 0.813853703  
rs2541248:53135536:C:T ENSG00000166260  
rs369825956:53161870:G:T:ENSG00000166260 0.035322296 0.603261923  
0.612361159 0.123210094 0.603364769 0.813853703  
rs369825956:53161870:G:T ENSG00000166260  
rs2628295:53169723:A:G:ENSG00000166260 0.035322296 0.596551252  
0.597182664 0.123210094 0.610999891 0.813853703  
rs2628295:53169723:A:G ENSG00000166260  
rs2111098:53174171:C:T:ENSG00000166260 0.035322296 0.566392291  
0.568513848 0.123210094 0.688090257 0.813853703  
rs2111098:53174171:C:T ENSG00000166260  
rs2529500:53188379:G:A:ENSG00000166260 0.035322296 0.591220107  
0.618696386 0.226823504 0.758499809 0.813853703  
rs2529500:53188379:G:A ENSG00000166260  
rs66476175:53197139:TTAA:T:ENSG00000166260 0.035322296 0.591220107  
0.618696386 0.226823504 0.760373793 0.813853703  
rs66476175:53197139:TTAA:T ENSG00000166260  
rs2628322:53205356:G:A:ENSG00000166260 0.035322296 0.600158632  
0.621329859 0.226823504 0.765632175 0.813853703  
rs2628322:53205356:G:A ENSG00000166260  
rs1029626:53220620:A:G:ENSG00000166260 0.035322296 0.602503447  
0.645109255 0.072575018 0.690981753 0.813853703  
rs1029626:53220620:A:G ENSG00000166260  
rs61756761:77079576:A:G:ENSG00000167280 0.117465891 0.039514306  
0.054815691 0.072575018 0.198669295 0.447199093  
rs61756761:77079576:A:G ENSG00000167280  
rs75984315:78011524:G:A:ENSG00000261978 0.295612735 0.039514306  
0.828327833 0.419678998 0.690981753 0.813853703  
rs75984315:78011524:G:A ENSG00000261978  
rs143724060:78067597:G:A:ENSG00000141519 0.035322296 0.615606804  
0.828327833 0.778955161 0.758499809 0.735371396  
rs143724060:78067597:G:A ENSG00000141519  
rs1970763:661812:A:G:ENSG00000132199 0.035322296 0.039514306  
0.828327833 0.276782326 0.544223189 0.628577259 rs1970763:661812:A:G  
ENSG00000132199

rs2612100:672363:G:A:ENSG00000132199 0.035322296 0.039514306  
0.806718901 0.276782326 0.54593522 0.650718924 rs2612100:672363:G:A  
ENSG00000132199

rs2741186:678947:A:G:ENSG00000132199 0.146129194 0.039514306  
0.828327833 0.226823504 0.484480155 0.813853703 rs2741186:678947:A:G  
ENSG00000132199

rs2612093:679334:T:C:ENSG00000132199 0.146129194 0.039514306  
0.828327833 0.226823504 0.484480155 0.813853703 rs2612093:679334:T:C  
ENSG00000132199

rs12968865:772622:A:G:ENSG00000132199 0.146129194 0.039514306  
0.828327833 0.579004696 0.690981753 0.813853703 rs12968865:772622:A:G  
ENSG00000132199

rs606105:11993038:A:G:ENSG00000141401 0.035322296 0.039514306  
0.054815691 0.072575018 0.069942274 0.063994875 rs606105:11993038:A:G  
ENSG00000141401

rs606020:11993096:T:G:ENSG00000141401 0.146968287 0.039514306  
0.054815691 0.072575018 0.112902598 0.063994875 rs606020:11993096:T:G  
ENSG00000141401

rs605636:11993138:C:G:ENSG00000141401 0.339000963 0.039514306  
0.238368074 0.276782326 0.54593522 0.063994875 rs605636:11993138:C:G  
ENSG00000141401

rs591061:11993175:C:T:ENSG00000141401 0.332523749 0.039514306  
0.054815691 0.072575018 0.148497947 0.063994875 rs591061:11993175:C:T  
ENSG00000141401

rs592577:11993748:A:G:ENSG00000141401 0.320653282 0.039514306  
0.238368074 0.244282474 0.54593522 0.063994875 rs592577:11993748:A:G  
ENSG00000141401

rs604962:11993889:T:C:ENSG00000141401 0.100009087 0.039514306  
0.054815691 0.072575018 0.069942274 0.063994875 rs604962:11993889:T:C  
ENSG00000141401

rs605047:11993959:T:C:ENSG00000141401 0.311750411 0.039514306  
0.222302049 0.276782326 0.512857075 0.063994875 rs605047:11993959:T:C  
ENSG00000141401

rs605964:11994163:T:C:ENSG00000141401 0.081933656 0.039514306  
0.054815691 0.072575018 0.069942274 0.063994875 rs605964:11994163:T:C  
ENSG00000141401

rs606370:11994253:T:C:ENSG00000141401 0.305615864 0.039514306  
0.222302049 0.276782326 0.484480155 0.063994875 rs606370:11994253:T:C  
ENSG00000141401

rs590277:11994258:G:A:ENSG00000141401 0.060909118 0.039514306  
0.054815691 0.072575018 0.069942274 0.063994875 rs590277:11994258:G:A  
ENSG00000141401

rs607200:11994414:C:T:ENSG00000141401 0.311750411 0.039514306 0.20393713  
0.276782326 0.484480155 0.063994875 rs607200:11994414:C:T  
ENSG00000141401

rs669838:ENSG00000141401 0.146968287 0.039514306 0.054815691  
0.072575018 0.237095457 0.063994875 rs669838 ENSG00000141401

rs636173:11996337:G:A:ENSG00000141401 0.035322296 0.039514306  
0.054815691 0.072575018 0.069942274 0.063994875 rs636173:11996337:G:A  
ENSG00000141401

rs671470:ENSG00000141401 0.035322296 0.039514306 0.054815691  
0.072575018 0.069942274 0.063994875 rs671470 ENSG00000141401

rs663401:12001971:C:T:ENSG00000141401 0.035322296 0.039514306  
0.054815691 0.072575018 0.069942274 0.063994875 rs663401:12001971:C:T  
ENSG00000141401

rs1249977:12002689:G:T:ENSG00000141401 0.035322296 0.039514306  
0.054815691 0.072575018 0.069942274 0.063994875  
rs1249977:12002689:G:T ENSG00000141401

rs7226475:12002922:T:C:ENSG00000141401 0.035322296 0.039514306  
0.054815691 0.072575018 0.069942274 0.063994875  
rs7226475:12002922:T:C ENSG00000141401

rs7244661:12002963:G:A:ENSG00000141401 0.035322296 0.039514306  
0.054815691 0.072575018 0.069942274 0.063994875  
rs7244661:12002963:G:A ENSG00000141401

rs9955982:12003278:C:T:ENSG00000141401 0.035322296 0.039514306  
0.054815691 0.072575018 0.069942274 0.063994875  
rs9955982:12003278:C:T ENSG00000141401

rs6505704:12003760:T:C:ENSG00000141401 0.035322296 0.039514306  
0.054815691 0.072575018 0.069942274 0.063994875  
rs6505704:12003760:T:C ENSG00000141401

rs6505706:12003953:T:C:ENSG00000141401 0.035322296 0.039514306  
0.054815691 0.072575018 0.148497947 0.063994875  
rs6505706:12003953:T:C ENSG00000141401

rs7234493:12004090:A:G:ENSG00000141401 0.035322296 0.039514306  
0.054815691 0.072575018 0.069942274 0.063994875  
rs7234493:12004090:A:G ENSG00000141401

rs626097:12004696:A:G:ENSG00000141401 0.035322296 0.039514306  
0.054815691 0.072575018 0.173591669 0.063994875 rs626097:12004696:A:G  
ENSG00000141401

rs12953406:12550908:T:C:ENSG00000134278 0.33585794 0.039514306  
0.090437058 0.123210094 0.112902598 0.108665807  
rs12953406:12550908:T:C ENSG00000134278

rs12961966:12552632:A:T:ENSG00000134278 0.271758927 0.039514306  
0.054815691 0.072575018 0.069942274 0.063994875  
rs12961966:12552632:A:T ENSG00000134278

rs58215411:12554125:C:T:ENSG00000134278 0.34585993 0.039514306  
0.121437838 0.123210094 0.148497947 0.108665807  
rs58215411:12554125:C:T ENSG00000134278

rs10445428:12555127:C:T:ENSG00000134278 0.243759522 0.039514306  
0.054815691 0.072575018 0.069942274 0.063994875  
rs10445428:12555127:C:T ENSG00000134278

rs11080582:12555802:C:T:ENSG00000134278 0.336997499 0.039514306  
0.121437838 0.123210094 0.148497947 0.108665807  
rs11080582:12555802:C:T ENSG00000134278

rs12964660:12556646:G:A:ENSG00000134278 0.271758927 0.039514306  
0.054815691 0.072575018 0.069942274 0.063994875  
rs12964660:12556646:G:A ENSG00000134278

rs11080584:12558095:T:C:ENSG00000134278 0.34585993 0.039514306  
0.121437838 0.123210094 0.148497947 0.108665807  
rs11080584:12558095:T:C ENSG00000134278

rs34456643:12565250:T:C:ENSG00000134278 0.278501935 0.039514306  
0.054815691 0.072575018 0.069942274 0.063994875  
rs34456643:12565250:T:C ENSG00000134278

rs114098461:29406593:G:A:ENSG00000153339 0.035322296 0.039514306  
0.828327833 0.739901512 0.942538391 0.063994875  
rs114098461:29406593:G:A ENSG00000153339

rs113509740:29412326:CAAT:C:ENSG00000153339 0.23344096 0.039514306  
0.572955873 0.476011459 0.647818531 0.063994875  
rs113509740:29412326:CAAT:C ENSG00000153339  
rs76611163:29418590:C:T:ENSG00000153339 0.278501935 0.039514306  
0.618696386 0.528521718 0.70366248 0.063994875  
rs76611163:29418590:C:T ENSG00000153339  
rs112148461:29428676:A:C:ENSG00000153339 0.330291618 0.039514306  
0.752478809 0.395341642 0.690981753 0.063994875  
rs112148461:29428676:A:C ENSG00000153339  
rs111250816:29436305:G:T:ENSG00000153339 0.228236375 0.039514306  
0.568513848 0.476011459 0.636822477 0.063994875  
rs111250816:29436305:G:T ENSG00000153339  
rs113286310:29438926:C:T:ENSG00000153339 0.228236375 0.039514306  
0.568513848 0.476011459 0.636822477 0.063994875  
rs113286310:29438926:C:T ENSG00000153339  
rs112629964:29443439:A:G:ENSG00000153339 0.331782397 0.039514306  
0.753805316 0.395341642 0.690981753 0.063994875  
rs112629964:29443439:A:G ENSG00000153339  
exm1381480:ENSG00000153339 0.228236375 0.039514306 0.568513848  
0.476011459 0.636822477 0.063994875 exm1381480 ENSG00000153339  
rs16962533:29451312:G:A:ENSG00000153339 0.278501935 0.039514306  
0.618696386 0.528521718 0.70366248 0.063994875  
rs16962533:29451312:G:A ENSG00000153339  
rs75328836:29456039:T:G:ENSG00000153339 0.228236375 0.039514306  
0.568513848 0.476011459 0.636822477 0.063994875  
rs75328836:29456039:T:G ENSG00000153339  
rs113256718:29462996:G:A:ENSG00000153339 0.282721177 0.039514306  
0.61437749 0.528521718 0.693223878 0.063994875  
rs113256718:29462996:G:A ENSG00000153339  
rs112287298:29466720:C:T:ENSG00000153339 0.278501935 0.039514306  
0.618696386 0.528521718 0.70366248 0.063994875  
rs112287298:29466720:C:T ENSG00000153339  
rs141693008:29469581:TATTTC:T:ENSG00000153339 0.282721177 0.039514306  
0.61437749 0.528521718 0.693223878 0.063994875  
rs141693008:29469581:TATTTC:T ENSG00000153339  
rs147324270:29474436:GA:G:ENSG00000153339 0.228236375 0.039514306  
0.568513848 0.476011459 0.636822477 0.063994875  
rs147324270:29474436:GA:G ENSG00000153339  
18:29477698:A:T:ENSG00000153339 0.280686821 0.039514306 0.614457891  
0.530641947 0.70366248 0.063994875 18:29477698:A:T ENSG00000153339  
rs111563713:29482778:C:T:ENSG00000153339 0.228236375 0.039514306  
0.568513848 0.476011459 0.636822477 0.063994875  
rs111563713:29482778:C:T ENSG00000153339  
rs16962565:29483666:G:A:ENSG00000153339 0.278501935 0.039514306  
0.618696386 0.528521718 0.70366248 0.063994875  
rs16962565:29483666:G:A ENSG00000153339  
rs77159512:29487639:A:T:ENSG00000153339 0.28152348 0.039514306  
0.612361159 0.528521718 0.690981753 0.063994875  
rs77159512:29487639:A:T ENSG00000153339  
rs113666085:29504598:G:T:ENSG00000153339 0.228236375 0.039514306  
0.568513848 0.476011459 0.636822477 0.063994875  
rs113666085:29504598:G:T ENSG00000153339

rs111311196:29506020:G:A:ENSG00000153339 0.228236375 0.039514306  
0.568513848 0.476011459 0.636822477 0.063994875  
rs111311196:29506020:G:A ENSG00000153339  
rs116765600:29507807:T:G:ENSG00000153339 0.27577637 0.039514306  
0.617968597 0.528521718 0.70366248 0.063994875  
rs116765600:29507807:T:G ENSG00000153339  
rs75684315:29522933:G:A:ENSG00000153339 0.146968287 0.039514306  
0.568513848 0.613788364 0.9305498 0.063994875  
rs75684315:29522933:G:A ENSG00000153339  
rs4806173:36024925:G:C:ENSG00000105677 0.169284753 0.039514306  
0.090437058 0.395341642 0.593489895 0.471730191  
rs4806173:36024925:G:C ENSG00000105677  
rs2251124:ENSG00000105677 0.271758927 0.039514306 0.655258797  
0.558498626 0.750632228 0.813853703 rs2251124 ENSG00000105677  
rs171376:38266993:C:T:ENSG00000120784 0.595986607 0.039514306  
0.770611985 0.491850645 0.933432342 0.063994875 rs171376:38266993:C:T  
ENSG00000120784  
rs3815710:41386494:A:C:ENSG00000213908 0.190392053 0.039514306  
0.466752146 0.447551187 0.355219989 0.108665807  
rs3815710:41386494:A:C ENSG00000213908  
rs28602288:41388740:C:T:ENSG00000213908 0.271758927 0.039514306  
0.390230616 0.072575018 0.069942274 0.201281701  
rs28602288:41388740:C:T ENSG00000213908  
rs28427254:41388777:A:G:ENSG00000213908 0.293391132 0.039514306  
0.370396184 0.466610843 0.237095457 0.108665807  
rs28427254:41388777:A:G ENSG00000213908  
rs11083580:41388836:G:A:ENSG00000213908 0.271758927 0.039514306  
0.310525978 0.408307051 0.251839208 0.108665807  
rs11083580:41388836:G:A ENSG00000213908  
rs16981882:ENSG00000268001 0.035322296 0.354347171 0.054815691  
0.165229468 0.787720344 0.319318857 rs16981882 ENSG00000268001  
rs7254361:48758095:A:G:ENSG00000268001 0.035322296 0.329515493  
0.054815691 0.123210094 0.749667392 0.319318857  
rs7254361:48758095:A:G ENSG00000268001  
rs113148838:49366864:T:C:ENSG00000104808 0.035322296 0.496476304  
0.054815691 0.263905944 0.760373793 0.063994875  
rs113148838:49366864:T:C ENSG00000104808  
JHU\_19.49369283:ENSG00000104808 0.035322296 0.455090809 0.054815691  
0.197042097 0.71243013 0.063994875 JHU\_19.49369283 ENSG00000104808  
rs10423971:50469876:C:T:ENSG00000105053 0.035322296 0.651399716  
0.778199855 0.512101623 0.54593522 0.569708815  
rs10423971:50469876:C:T ENSG00000105053  
rs4542770:50477507:C:T:ENSG00000105053 0.035322296 0.545396919  
0.618696386 0.244282474 0.112902598 0.201281701  
rs4542770:50477507:C:T ENSG00000105053  
rs57178813:50478287:GATC:G:ENSG00000105053 0.035322296 0.545396919  
0.618696386 0.244282474 0.112902598 0.201281701  
rs57178813:50478287:GATC:G ENSG00000105053  
rs79125155:50478852:C:T:ENSG00000105053 0.035322296 0.651399716  
0.767163632 0.505302083 0.544223189 0.56328436  
rs79125155:50478852:C:T ENSG00000105053  
rs79125155:50478852:C:T:ENSG00000204666 0.035322296 0.039514306  
0.054815691 0.072575018 0.54593522 0.269135872  
rs79125155:50478852:C:T ENSG00000204666

rs73933920:50479676:C:T:ENSG00000105053 0.035322296 0.461224231  
0.568513848 0.072575018 0.069942274 0.063994875  
rs73933920:50479676:C:T ENSG00000105053  
rs13345672:50479887:C:T:ENSG00000105053 0.035322296 0.618523 0.70008691  
0.458827356 0.363699827 0.471730191 rs13345672:50479887:C:T  
ENSG00000105053  
rs35937899:50480004:ATT:AT:ENSG00000105053 0.035322296 0.605632687  
0.683035763 0.455203609 0.347424829 0.451526982  
rs35937899:50480004:ATT:AT ENSG00000105053  
rs722121:50480164:A:G:ENSG00000105053 0.035322296 0.543518091  
0.618696386 0.226823504 0.112902598 0.201281701 rs722121:50480164:A:G  
ENSG00000105053  
rs55706842:50480657:T:C:ENSG00000105053 0.035322296 0.543518091  
0.618696386 0.226823504 0.112902598 0.201281701  
rs55706842:50480657:T:C ENSG00000105053  
rs56140915:50480668:C:T:ENSG00000105053 0.035322296 0.618523 0.70008691  
0.458827356 0.363699827 0.469127215 rs56140915:50480668:C:T  
ENSG00000105053  
rs16981592:50480709:T:C:ENSG00000105053 0.035322296 0.618523 0.70008691  
0.458827356 0.363699827 0.469127215 rs16981592:50480709:T:C  
ENSG00000105053  
rs73933923:50480726:G:A:ENSG00000105053 0.035322296 0.290843861  
0.400191924 0.072575018 0.069942274 0.063994875  
rs73933923:50480726:G:A ENSG00000105053  
rs73933924:50480762:G:A:ENSG00000105053 0.035322296 0.461224231  
0.568366244 0.072575018 0.069942274 0.063994875  
rs73933924:50480762:G:A ENSG00000105053  
rs16981594:50480767:G:A:ENSG00000105053 0.035322296 0.618523 0.70008691  
0.458827356 0.363699827 0.469127215 rs16981594:50480767:G:A  
ENSG00000105053  
rs10413752:50480909:A:G:ENSG00000105053 0.035322296 0.651399716  
0.762115044 0.505302083 0.538368464 0.56328436  
rs10413752:50480909:A:G ENSG00000105053  
rs10414478:50480919:G:A:ENSG00000105053 0.035322296 0.611028519  
0.762115044 0.520505218 0.595947504 0.477177495  
rs10414478:50480919:G:A ENSG00000105053  
rs34958342:50481082:A:T:ENSG00000204666 0.035322296 0.651227337  
0.184980376 0.379688866 0.9305498 0.063994875  
rs34958342:50481082:A:T ENSG00000204666  
rs10416166:50481154:T:C:ENSG00000105053 0.035322296 0.440891171  
0.545428271 0.072575018 0.069942274 0.063994875  
rs10416166:50481154:T:C ENSG00000105053  
rs10414636:50481271:A:T:ENSG00000105053 0.035322296 0.480240845  
0.568513848 0.072575018 0.069942274 0.063994875  
rs10414636:50481271:A:T ENSG00000105053  
rs205338:50481284:G:A:ENSG00000105053 0.035322296 0.517058604  
0.584308021 0.123210094 0.069942274 0.108665807 rs205338:50481284:G:A  
ENSG00000105053  
rs10416566:50481320:T:C:ENSG00000105053 0.035322296 0.600158632  
0.664963743 0.390584104 0.237095457 0.390568128  
rs10416566:50481320:T:C ENSG00000105053  
rs73932218:50481411:A:G:ENSG00000105053 0.035322296 0.463260354  
0.568513848 0.072575018 0.069942274 0.063994875  
rs73932218:50481411:A:G ENSG00000105053



rs73932219:50481510:A:G:ENSG00000105053 0.035322296 0.612465533  
0.680579361 0.408307051 0.311775972 0.441545027  
rs73932219:50481510:A:G ENSG00000105053  
rs73932220:50481645:C:T:ENSG00000105053 0.035322296 0.463260354  
0.568513848 0.072575018 0.069942274 0.063994875  
rs73932220:50481645:C:T ENSG00000105053  
rs73932221:50481652:T:C:ENSG00000105053 0.035322296 0.604833185  
0.674762224 0.438119062 0.340307796 0.441545027  
rs73932221:50481652:T:C ENSG00000105053  
rs755969:50481927:C:T:ENSG00000105053 0.035322296 0.604833185  
0.674171317 0.438119062 0.340307796 0.441545027 rs755969:50481927:C:T  
ENSG00000105053  
rs15983:50482480:C:T:ENSG00000105053 0.035322296 0.604833185  
0.674171317 0.438119062 0.340307796 0.441545027 rs15983:50482480:C:T  
ENSG00000105053  
rs35464650:50482910:C:T:ENSG00000105053 0.035322296 0.626739008  
0.466752146 0.197042097 0.069942274 0.797872501  
rs35464650:50482910:C:T ENSG00000105053  
rs200204653:50483142:A:AG:ENSG00000105053 0.035322296 0.604833185  
0.674171317 0.432896498 0.340307796 0.438723573  
rs200204653:50483142:A:AG ENSG00000105053  
rs10417880:50483149:T:C:ENSG00000105053 0.035322296 0.515426761  
0.592067279 0.123210094 0.069942274 0.108665807  
rs10417880:50483149:T:C ENSG00000105053  
rs149213678:50483334:A:AAAAT:ENSG00000105053 0.035322296 0.535783092  
0.605977561 0.165229468 0.069942274 0.140342165  
rs149213678:50483334:A:AAAAT ENSG00000105053  
rs16981613:50483670:T:C:ENSG00000105053 0.035322296 0.634930259  
0.718826765 0.491850645 0.438540244 0.506819053  
rs16981613:50483670:T:C ENSG00000105053  
rs201173142:50484030:T:TTG:ENSG00000105053 0.035322296 0.634930259  
0.718826765 0.491850645 0.438540244 0.506819053  
rs201173142:50484030:T:TTG ENSG00000105053  
rs59712866:50484032:T:TG:ENSG00000105053 0.035322296 0.634930259  
0.718826765 0.491850645 0.438540244 0.506819053  
rs59712866:50484032:T:TG ENSG00000105053  
rs16981615:50484052:C:T:ENSG00000105053 0.035322296 0.634930259  
0.718826765 0.491850645 0.438540244 0.506819053  
rs16981615:50484052:C:T ENSG00000105053  
rs56404076:50484208:G:A:ENSG00000105053 0.035322296 0.634930259  
0.718826765 0.491850645 0.438540244 0.506819053  
rs56404076:50484208:G:A ENSG00000105053  
JHU\_19.50484346:ENSG00000105053 0.035322296 0.634930259 0.718826765  
0.489772876 0.438540244 0.506819053 JHU\_19.50484346 ENSG00000105053  
19:50484571:A:AG:ENSG00000105053 0.035322296 0.632005909 0.714717525  
0.478009532 0.438540244 0.506819053 19:50484571:A:AG ENSG00000105053  
rs73932222:50485134:A:G:ENSG00000105053 0.035322296 0.624052474 0.69711943  
0.478009532 0.438540244 0.503271951 rs73932222:50485134:A:G  
ENSG00000105053  
rs73932225:50485384:G:T:ENSG00000105053 0.035322296 0.621180076  
0.693319897 0.459055393 0.340307796 0.468334324  
rs73932225:50485384:G:T ENSG00000105053

rs73932226:50485478:A:G:ENSG00000105053 0.035322296 0.626739008 0.70601294  
0.447551187 0.328523647 0.467974804 rs73932226:50485478:A:G  
ENSG00000105053

rs73932227:50485548:T:C:ENSG00000105053 0.035322296 0.632005909  
0.717524365 0.486971863 0.438540244 0.503271951  
rs73932227:50485548:T:C ENSG00000105053

rs57672084:50485747:G:GA:ENSG00000105053 0.035322296 0.613345947  
0.680579361 0.401539023 0.218559406 0.419171564  
rs57672084:50485747:G:GA ENSG00000105053

rs59324729:50486023:C:T:ENSG00000105053 0.035322296 0.614466288  
0.685268659 0.401539023 0.266901314 0.401203391  
rs59324729:50486023:C:T ENSG00000105053

rs61631403:50486056:T:C:ENSG00000105053 0.035322296 0.648883851  
0.740552043 0.469436994 0.347424829 0.476127813  
rs61631403:50486056:T:C ENSG00000105053

rs56793526:50486060:A:C:ENSG00000105053 0.035322296 0.64788567  
0.740140062 0.472415297 0.340307796 0.476127813  
rs56793526:50486060:A:C ENSG00000105053

rs16981625:50486314:G:C:ENSG00000105053 0.035322296 0.651227337  
0.744376278 0.509242766 0.480692872 0.563139599  
rs16981625:50486314:G:C ENSG00000105053

rs73932228:50486440:A:G:ENSG00000105053 0.035322296 0.650780207  
0.743226112 0.512101623 0.477032507 0.563139599  
rs73932228:50486440:A:G ENSG00000105053

rs73932230:50486521:G:A:ENSG00000105053 0.035322296 0.651399716  
0.797880971 0.558498626 0.690981753 0.562535698  
rs73932230:50486521:G:A ENSG00000105053

rs73932232:50486540:G:A:ENSG00000105053 0.035322296 0.637435282  
0.738200785 0.463396258 0.355219989 0.457928806  
rs73932232:50486540:G:A ENSG00000105053

rs73932233:50486687:G:A:ENSG00000105053 0.035322296 0.642113186  
0.731144493 0.466610843 0.355219989 0.487204938  
rs73932233:50486687:G:A ENSG00000105053

rs148093508:50487193:TG:T:ENSG00000105053 0.035322296 0.642113186  
0.731144493 0.466610843 0.355219989 0.487204938  
rs148093508:50487193:TG:T ENSG00000105053

rs12165126:50487432:G:C:ENSG00000105053 0.035322296 0.346656012  
0.406502841 0.263905944 0.069942274 0.063994875  
rs12165126:50487432:G:C ENSG00000105053

rs13382171:50487821:G:A:ENSG00000105053 0.035322296 0.62210204 0.70008691  
0.463396258 0.395007577 0.477177495 rs13382171:50487821:G:A  
ENSG00000105053

rs59634487:50487994:T:C:ENSG00000105053 0.035322296 0.62210204 0.69711943  
0.463396258 0.395007577 0.477177495 rs59634487:50487994:T:C  
ENSG00000105053

rs77696537:50488259:T:C:ENSG00000105053 0.035322296 0.62210204 0.69711943  
0.463396258 0.395007577 0.477177495 rs77696537:50488259:T:C  
ENSG00000105053

rs116574306:50488311:G:A:ENSG00000105053 0.035322296 0.621195464  
0.694666609 0.459055393 0.395007577 0.4815871  
rs116574306:50488311:G:A ENSG00000105053

rs55780989:50488495:C:T:ENSG00000105053 0.035322296 0.621195464  
0.694666609 0.459055393 0.395007577 0.4815871  
rs55780989:50488495:C:T ENSG00000105053

rs73932236:50488606:C:T:ENSG00000105053 0.035322296 0.621195464  
0.694666609 0.459055393 0.395007577 0.4815871  
rs73932236:50488606:C:T ENSG00000105053  
rs73932237:50488639:C:T:ENSG00000105053 0.035322296 0.615606804  
0.695869412 0.454179145 0.388754065 0.464247637  
rs73932237:50488639:C:T ENSG00000105053  
rs11083993:50488958:G:C:ENSG00000105053 0.035322296 0.603890882  
0.670633075 0.429269101 0.288162171 0.441545027  
rs11083993:50488958:G:C ENSG00000105053  
rs11083994:50489044:G:T:ENSG00000105053 0.035322296 0.621195464  
0.694666609 0.459055393 0.395007577 0.4815871  
rs11083994:50489044:G:T ENSG00000105053  
rs11083995:50489046:T:C:ENSG00000105053 0.035322296 0.621195464  
0.694666609 0.459055393 0.395007577 0.4815871  
rs11083995:50489046:T:C ENSG00000105053  
rs10408871:50489359:C:G:ENSG00000105053 0.035322296 0.621195464  
0.694666609 0.459055393 0.395007577 0.4815871  
rs10408871:50489359:C:G ENSG00000105053  
rs10409147:50489564:A:G:ENSG00000105053 0.035322296 0.621195464  
0.694666609 0.459055393 0.395007577 0.4815871  
rs10409147:50489564:A:G ENSG00000105053  
rs11882374:50489825:T:C:ENSG00000105053 0.035322296 0.613345947  
0.681949548 0.414104514 0.300892226 0.438723573  
rs11882374:50489825:T:C ENSG00000105053  
rs11879527:50489961:A:G:ENSG00000105053 0.035322296 0.629866286  
0.712504133 0.491850645 0.403448628 0.51457021  
rs11879527:50489961:A:G ENSG00000105053  
rs11879568:50490075:C:T:ENSG00000105053 0.035322296 0.621195464  
0.694666609 0.459055393 0.395007577 0.4815871  
rs11879568:50490075:C:T ENSG00000105053  
rs73932262:50490170:A:C:ENSG00000105053 0.035322296 0.62210204 0.69711943  
0.463396258 0.395007577 0.477177495 rs73932262:50490170:A:C  
ENSG00000105053  
rs34927402:50490352:C:T:ENSG00000105053 0.035322296 0.623013991 0.69711943  
0.463396258 0.395007577 0.477177495 rs34927402:50490352:C:T  
ENSG00000105053  
19:50490490-C-T:ENSG00000105053 0.035322296 0.628196016 0.707238467  
0.491850645 0.445056985 0.535941137 19:50490490-C-T ENSG00000105053  
rs11879659:50490522:C:T:ENSG00000105053 0.035322296 0.626739008 0.70601294  
0.491850645 0.450253392 0.535941137 rs11879659:50490522:C:T  
ENSG00000105053  
19:50490539-C-T:ENSG00000105053 0.035322296 0.624868528 0.707238467  
0.491850645 0.450253392 0.535941137 19:50490539-C-T ENSG00000105053  
rs11879641:ENSG00000105053 0.035322296 0.626739008 0.704400012  
0.491850645 0.450253392 0.535941137 rs11879641 ENSG00000105053  
rs11882531:50490580:T:C:ENSG00000105053 0.035322296 0.626739008  
0.704400012 0.491850645 0.450253392 0.535941137  
rs11882531:50490580:T:C ENSG00000105053  
rs72382574:50490686:GCTCC:G:ENSG00000105053 0.035322296 0.6447756  
0.738200785 0.496527133 0.455878819 0.550290331  
rs72382574:50490686:GCTCC:G ENSG00000105053  
JHU\_19.50490767:ENSG00000105053 0.035322296 0.651399716 0.767163632  
0.546358114 0.550609082 0.613318589 JHU\_19.50490767 ENSG00000105053

rs150922686:50491039:A:G:ENSG00000105053 0.035322296 0.651399716  
0.767163632 0.546358114 0.550609082 0.613318589  
rs150922686:50491039:A:G ENSG00000105053  
rs181644066:50491047:A:C:ENSG00000105053 0.035322296 0.603890882  
0.668344684 0.395341642 0.251839208 0.374953256  
rs181644066:50491047:A:C ENSG00000105053  
rs187102874:50491053:A:G:ENSG00000105053 0.035322296 0.628196016  
0.708429962 0.450346002 0.395007577 0.469127215  
rs187102874:50491053:A:G ENSG00000105053  
rs73932267:50491346:T:G:ENSG00000105053 0.035322296 0.600158632  
0.660396949 0.401539023 0.251839208 0.382106273  
rs73932267:50491346:T:G ENSG00000105053  
rs201067979:50491571:TCCACCTGCAGGGTTCTGCTGA:T:ENSG00000105053  
0.035322296 0.612465533 0.679533134 0.399004389 0.173591669  
0.401203391 rs201067979:50491571:TCCACCTGCAGGGTTCTGCTGA:T  
ENSG00000105053  
rs73932268:50491733:G:A:ENSG00000105053 0.035322296 0.592406993  
0.655258797 0.395341642 0.173591669 0.382106273  
rs73932268:50491733:G:A ENSG00000105053  
exml493319:ENSG00000105053 0.035322296 0.612465533 0.679533134  
0.399004389 0.198669295 0.414364157 exml493319 ENSG00000105053  
rs59676748:50491936:T:TCTTA:ENSG00000105053 0.035322296 0.614466288  
0.681949548 0.406267798 0.198669295 0.431187426  
rs59676748:50491936:T:TCTTA ENSG00000105053  
rs7254850:50492030:C:T:ENSG00000105053 0.035322296 0.608740409  
0.678642404 0.399004389 0.266901314 0.431187426  
rs7254850:50492030:C:T ENSG00000105053  
rs7254964:50492120:C:T:ENSG00000105053 0.035322296 0.610547431  
0.679533134 0.401539023 0.279727316 0.438723573  
rs7254964:50492120:C:T ENSG00000105053  
rs16981637:50492272:A:G:ENSG00000105053 0.035322296 0.619608693  
0.687554362 0.406267798 0.218559406 0.419171564  
rs16981637:50492272:A:G ENSG00000105053  
rs56284138:50492308:C:T:ENSG00000105053 0.035322296 0.619608693  
0.686442642 0.408307051 0.266901314 0.441545027  
rs56284138:50492308:C:T ENSG00000105053  
rs10418911:50492751:C:T:ENSG00000105053 0.035322296 0.604833185  
0.671106111 0.385352708 0.237095457 0.401203391  
rs10418911:50492751:C:T ENSG00000105053  
rs10424249:50492813:C:T:ENSG00000105053 0.035322296 0.651399716  
0.761772115 0.496527133 0.484480155 0.545172079  
rs10424249:50492813:C:T ENSG00000105053  
rs73932271:50493535:A:G:ENSG00000105053 0.035322296 0.596551252  
0.655792554 0.350892299 0.173591669 0.295623551  
rs73932271:50493535:A:G ENSG00000105053  
rs80095022:50493581:T:C:ENSG00000105053 0.035322296 0.591771121 0.65418952  
0.358702521 0.237095457 0.319318857 rs80095022:50493581:T:C  
ENSG00000105053  
rs10541451:50493976:CTA:C:ENSG00000105053 0.035322296 0.595671165  
0.655792554 0.333474506 0.148497947 0.295623551  
rs10541451:50493976:CTA:C ENSG00000105053  
rs8102461:50493992:G:C:ENSG00000105053 0.035322296 0.634437555  
0.717524365 0.469436994 0.340307796 0.469127215  
rs8102461:50493992:G:C ENSG00000105053

rs11315688:50494040:AT:A:ENSG00000105053 0.035322296 0.624868528  
0.828327833 0.491850645 0.438540244 0.550290331  
rs11315688:50494040:AT:A ENSG00000105053  
rs8103252:50494102:T:C:ENSG00000105053 0.035322296 0.63739825  
0.721465596 0.459055393 0.328523647 0.467974804  
rs8103252:50494102:T:C ENSG00000105053  
rs8103340:50494123:T:C:ENSG00000105053 0.035322296 0.602503447  
0.661919508 0.340834261 0.173591669 0.333543658  
rs8103340:50494123:T:C ENSG00000105053  
rs8103356:50494166:T:C:ENSG00000105053 0.035322296 0.607630844  
0.674868706 0.424824518 0.311775972 0.451526982  
rs8103356:50494166:T:C ENSG00000105053  
rs8102635:50494242:C:T:ENSG00000105053 0.035322296 0.613345947  
0.680579361 0.429269101 0.300892226 0.438723573  
rs8102635:50494242:C:T ENSG00000105053  
rs10406726:50494485:A:G:ENSG00000105053 0.035322296 0.631133206  
0.712504133 0.435112224 0.347424829 0.467974804  
rs10406726:50494485:A:G ENSG00000105053  
rs10407109:50494563:C:A:ENSG00000105053 0.035322296 0.632005909  
0.713452083 0.435112224 0.340307796 0.467974804  
rs10407109:50494563:C:A ENSG00000105053  
rs59511347:50494792:G:A:ENSG00000105053 0.035322296 0.469499546  
0.642599458 0.379688866 0.266901314 0.308405655  
rs59511347:50494792:G:A ENSG00000105053  
rs10413464:50495076:C:T:ENSG00000105053 0.035322296 0.604833185  
0.670633075 0.432896498 0.311775972 0.447199093  
rs10413464:50495076:C:T ENSG00000105053  
rs10413869:50495240:C:T:ENSG00000105053 0.035322296 0.596551252  
0.655792554 0.387628207 0.218559406 0.369977602  
rs10413869:50495240:C:T ENSG00000105053  
rs7253014:50495527:A:G:ENSG00000105053 0.035322296 0.650780207  
0.743226112 0.513724482 0.538368464 0.586168441  
rs7253014:50495527:A:G ENSG00000105053  
rs7253041:50495589:A:G:ENSG00000105053 0.035322296 0.649779607  
0.743226112 0.519043541 0.538368464 0.58035006  
rs7253041:50495589:A:G ENSG00000105053  
rs10423200:50496444:T:C:ENSG00000105053 0.035322296 0.649779607  
0.741940112 0.519043541 0.538368464 0.577395471  
rs10423200:50496444:T:C ENSG00000105053  
rs9304691:50496622:G:A:ENSG00000105053 0.035322296 0.651399716  
0.800036916 0.546358114 0.54593522 0.593888412  
rs9304691:50496622:G:A ENSG00000105053  
rs9304692:50496783:G:A:ENSG00000105053 0.035322296 0.600790062  
0.661919508 0.414104514 0.251839208 0.419171564  
rs9304692:50496783:G:A ENSG00000105053  
rs150214388:50496802:G:C:ENSG00000105053 0.035322296 0.602503447  
0.668344684 0.419678998 0.266901314 0.423659401  
rs150214388:50496802:G:C ENSG00000105053  
rs145781311:50496804:T:C:ENSG00000105053 0.035322296 0.602503447  
0.668344684 0.419678998 0.266901314 0.423659401  
rs145781311:50496804:T:C ENSG00000105053  
rs148928059:50496805:G:A:ENSG00000105053 0.035322296 0.604833185  
0.669205477 0.414104514 0.251839208 0.423659401  
rs148928059:50496805:G:A ENSG00000105053

rs9304693:50496814:C:A:ENSG00000105053 0.035322296 0.604833185  
0.669205477 0.414104514 0.251839208 0.423659401  
rs9304693:50496814:C:A ENSG00000105053  
rs9304694:50496953:G:A:ENSG00000105053 0.035322296 0.604833185  
0.671106111 0.429269101 0.251839208 0.423659401  
rs9304694:50496953:G:A ENSG00000105053  
rs9304695:50497084:C:T:ENSG00000105053 0.035322296 0.603890882  
0.667476732 0.399004389 0.237095457 0.390568128  
rs9304695:50497084:C:T ENSG00000105053  
rs7247777:50497747:T:G:ENSG00000105053 0.035322296 0.604833185  
0.669205477 0.401539023 0.237095457 0.390568128  
rs7247777:50497747:T:G ENSG00000105053  
rs73935115:50497783:C:T:ENSG00000105053 0.035322296 0.604833185  
0.669205477 0.401539023 0.237095457 0.390568128  
rs73935115:50497783:C:T ENSG00000105053  
rs57668237:50497976:TG:T:ENSG00000105053 0.035322296 0.651399716  
0.782893708 0.558498626 0.679445541 0.661034047  
rs57668237:50497976:TG:T ENSG00000105053  
rs10409085:50497987:A:T:ENSG00000105053 0.035322296 0.651399716  
0.781136655 0.558498626 0.650850274 0.643131518  
rs10409085:50497987:A:T ENSG00000105053  
rs10411020:50498037:T:C:ENSG00000105053 0.035322296 0.651399716  
0.788355591 0.558498626 0.676756626 0.663342074  
rs10411020:50498037:T:C ENSG00000105053  
exm1493342:ENSG00000105053 0.035322296 0.651399716 0.790544482  
0.558498626 0.679445541 0.663342074 exm1493342 ENSG00000105053  
exm1493346:ENSG00000105053 0.035322296 0.651399716 0.791608149  
0.558498626 0.683006713 0.663342074 exm1493346 ENSG00000105053  
rs9304696:50498328:T:C:ENSG00000105053 0.035322296 0.651399716  
0.790544482 0.558498626 0.667917828 0.660124342  
rs9304696:50498328:T:C ENSG00000105053  
rs9304697:50498388:G:A:ENSG00000105053 0.035322296 0.654488658 0.80410788  
0.563128951 0.690981753 0.707675982 rs9304697:50498388:G:A  
ENSG00000105053  
rs9304698:50498552:G:A:ENSG00000105053 0.035322296 0.651399716  
0.795919388 0.558498626 0.676756626 0.681432383  
rs9304698:50498552:G:A ENSG00000105053  
rs9304700:50498635:C:T:ENSG00000105053 0.035322296 0.654488658  
0.809082901 0.572233838 0.690981753 0.713958104  
rs9304700:50498635:C:T ENSG00000105053  
rs10417604:50499230:G:A:ENSG00000105053 0.035322296 0.654488658  
0.808362103 0.572952418 0.690981753 0.713958104  
rs10417604:50499230:G:A ENSG00000105053  
rs10417608:50499240:G:A:ENSG00000105053 0.035322296 0.654488658  
0.808362103 0.572952418 0.690981753 0.713958104  
rs10417608:50499240:G:A ENSG00000105053  
rs58859982:50499476:C:CT:ENSG00000105053 0.035322296 0.60953669  
0.759245271 0.558498626 0.603364769 0.628577259  
rs58859982:50499476:C:CT ENSG00000105053  
rs116271340:50500126:A:G:ENSG00000105053 0.035322296 0.638346134  
0.727343376 0.489772876 0.460100455 0.522761587  
rs116271340:50500126:A:G ENSG00000105053



rs76503872:50500192:G:A:ENSG00000105053 0.035322296 0.651399716  
0.782434772 0.553367313 0.54593522 0.615926697  
rs76503872:50500192:G:A ENSG00000105053  
rs57217408:50500283:T:C:ENSG00000105053 0.035322296 0.640371361  
0.729810297 0.491850645 0.467095788 0.525367746  
rs57217408:50500283:T:C ENSG00000105053  
rs149403807:50500323:T:C:ENSG00000105053 0.035322296 0.638346134  
0.726206733 0.491850645 0.429827068 0.52739468  
rs149403807:50500323:T:C ENSG00000105053  
rs61476152:50500386:T:C:ENSG00000105053 0.035322296 0.563654004  
0.618696386 0.290136921 0.112902598 0.282646046  
rs61476152:50500386:T:C ENSG00000105053  
rs10425470:50500647:C:T:ENSG00000105053 0.035322296 0.563654004  
0.618696386 0.290136921 0.112902598 0.282646046  
rs10425470:50500647:C:T ENSG00000105053  
rs10425307:50500697:A:G:ENSG00000105053 0.035322296 0.563654004  
0.618696386 0.290136921 0.112902598 0.282646046  
rs10425307:50500697:A:G ENSG00000105053  
rs10404987:50500916:A:G:ENSG00000105053 0.035322296 0.581512524  
0.644499314 0.326422852 0.069942274 0.319318857  
rs10404987:50500916:A:G ENSG00000105053  
rs10405594:50500970:G:A:ENSG00000105053 0.035322296 0.563654004  
0.618696386 0.290136921 0.112902598 0.282646046  
rs10405594:50500970:G:A ENSG00000105053  
rs10407013:50501054:T:A:ENSG00000105053 0.035322296 0.563654004  
0.618696386 0.290136921 0.112902598 0.282646046  
rs10407013:50501054:T:A ENSG00000105053  
rs10407036:50501097:T:C:ENSG00000105053 0.035322296 0.588835269  
0.552896362 0.450346002 0.371793022 0.063994875  
rs10407036:50501097:T:C ENSG00000105053  
rs10405696:50501185:C:T:ENSG00000105053 0.035322296 0.583196386  
0.644499314 0.326422852 0.069942274 0.319318857  
rs10405696:50501185:C:T ENSG00000105053  
rs59151138:50501240:C:T:ENSG00000105053 0.035322296 0.582202806  
0.642599458 0.333474506 0.112902598 0.319318857  
rs59151138:50501240:C:T ENSG00000105053  
rs56969688:50501282:G:A:ENSG00000105053 0.035322296 0.56175896  
0.618696386 0.290136921 0.112902598 0.282646046  
rs56969688:50501282:G:A ENSG00000105053  
rs72202397:50501428:TTAA:T:ENSG00000105053 0.035322296 0.650780207  
0.743226112 0.498363812 0.429827068 0.556049114  
rs72202397:50501428:TTAA:T ENSG00000105053  
rs78635820:50501545:A:G:ENSG00000105053 0.035322296 0.649989953  
0.741940112 0.491850645 0.445056985 0.52739468  
rs78635820:50501545:A:G ENSG00000105053  
rs146029016:50501590:G:A:ENSG00000105053 0.035322296 0.649989953  
0.741940112 0.491850645 0.445056985 0.525367746  
rs146029016:50501590:G:A ENSG00000105053  
rs139597461:50501615:G:A:ENSG00000105053 0.035322296 0.651399716  
0.757967988 0.513724482 0.477032507 0.571826948  
rs139597461:50501615:G:A ENSG00000105053  
rs149747798:50501683:G:T:ENSG00000105053 0.035322296 0.649989953  
0.741940112 0.491850645 0.445056985 0.525367746  
rs149747798:50501683:G:T ENSG00000105053

rs199500647:50502044:CACACAT:C:ENSG00000105053 0.035322296  
0.649989953 0.741940112 0.491850645 0.445056985 0.525367746  
rs199500647:50502044:CACACAT:C ENSG00000105053  
rs80198463:50502177:G:A:ENSG00000105053 0.035322296 0.651399716  
0.759245271 0.513724482 0.472198515 0.566496688  
rs80198463:50502177:G:A ENSG00000105053  
rs28495077:50502314:T:A:ENSG00000105053 0.035322296 0.651399716  
0.759245271 0.513724482 0.472198515 0.566496688  
rs28495077:50502314:T:A ENSG00000105053  
rs28417980:50502610:C:T:ENSG00000105053 0.035322296 0.649989953  
0.741940112 0.491850645 0.445056985 0.525367746  
rs28417980:50502610:C:T ENSG00000105053  
rs28585040:50502722:C:T:ENSG00000105053 0.035322296 0.649989953  
0.741940112 0.491850645 0.445056985 0.525367746  
rs28585040:50502722:C:T ENSG00000105053  
rs11881396:50502896:C:A:ENSG00000105053 0.035322296 0.649989953  
0.741940112 0.491850645 0.445056985 0.525367746  
rs11881396:50502896:C:A ENSG00000105053  
rs11881395:50502932:A:G:ENSG00000105053 0.035322296 0.649989953  
0.741940112 0.491850645 0.445056985 0.525367746  
rs11881395:50502932:A:G ENSG00000105053  
rs11881422:50502994:C:T:ENSG00000105053 0.035322296 0.649989953  
0.741940112 0.491850645 0.445056985 0.525367746  
rs11881422:50502994:C:T ENSG00000105053  
rs11881402:50502995:A:G:ENSG00000105053 0.035322296 0.649989953  
0.741940112 0.491850645 0.445056985 0.525367746  
rs11881402:50502995:A:G ENSG00000105053  
rs11878912:50503181:T:C:ENSG00000105053 0.035322296 0.649989953  
0.741940112 0.491850645 0.445056985 0.525367746  
rs11878912:50503181:T:C ENSG00000105053  
rs10408432:50503589:C:G:ENSG00000105053 0.035322296 0.649779607  
0.743226112 0.491850645 0.445056985 0.525367746  
rs10408432:50503589:C:G ENSG00000105053  
rs142667207:50503645:TTC:T:ENSG00000105053 0.035322296 0.649989953  
0.741940112 0.491850645 0.445056985 0.525367746  
rs142667207:50503645:TTC:T ENSG00000105053  
JHU\_19.50503893:ENSG00000105053 0.035322296 0.649989953 0.741940112  
0.491850645 0.445056985 0.525367746 JHU\_19.50503893 ENSG00000105053  
rs11882190:50503904:G:A:ENSG00000105053 0.035322296 0.649989953  
0.741940112 0.491850645 0.445056985 0.525367746  
rs11882190:50503904:G:A ENSG00000105053  
JHU\_19.50503907:ENSG00000105053 0.035322296 0.649989953 0.743226112  
0.491850645 0.445056985 0.525367746 JHU\_19.50503907 ENSG00000105053  
rs11882175:50503972:C:G:ENSG00000105053 0.035322296 0.649989953  
0.743226112 0.491850645 0.445056985 0.525367746  
rs11882175:50503972:C:G ENSG00000105053  
19:50504056-TC:ENSG00000105053 0.035322296 0.649989953 0.743226112  
0.491850645 0.445056985 0.525367746 19:50504056-TC ENSG00000105053  
exm1493362:ENSG00000105053 0.035322296 0.6447756 0.734607875  
0.491850645 0.450253392 0.549252346 exm1493362 ENSG00000105053  
rs73935126:50504343:C:T:ENSG00000105053 0.035322296 0.624712816  
0.702915418 0.459055393 0.300892226 0.467974804  
rs73935126:50504343:C:T ENSG00000105053

rs73935127:50504368:C:T:ENSG00000105053 0.035322296 0.62210204  
0.694666609 0.458827356 0.340307796 0.477177495  
rs73935127:50504368:C:T ENSG00000105053  
rs73935128:50504543:A:G:ENSG00000105053 0.035322296 0.535783092  
0.605977561 0.276782326 0.148497947 0.225997306  
rs73935128:50504543:A:G ENSG00000105053  
rs28479082:50504584:T:C:ENSG00000105053 0.035322296 0.607630844  
0.674762224 0.395341642 0.279727316 0.390568128  
rs28479082:50504584:T:C ENSG00000105053  
rs28492981:50504620:G:A:ENSG00000105053 0.035322296 0.607882402  
0.674868706 0.395341642 0.279727316 0.390568128  
rs28492981:50504620:G:A ENSG00000105053  
rs75265852:50504808:T:C:ENSG00000105053 0.035322296 0.607630844  
0.674868706 0.390584104 0.173591669 0.390568128  
rs75265852:50504808:T:C ENSG00000105053  
rs73935129:50504968:G:C:ENSG00000105053 0.035322296 0.634930259  
0.720006217 0.459055393 0.420268827 0.471730191  
rs73935129:50504968:G:C ENSG00000105053  
rs73935130:50505096:G:A:ENSG00000105053 0.035322296 0.604833185  
0.671106111 0.463396258 0.311775972 0.476127813  
rs73935130:50505096:G:A ENSG00000105053  
rs10423007:50505316:G:A:ENSG00000105053 0.035322296 0.632005909  
0.716164833 0.472415297 0.363699827 0.501122218  
rs10423007:50505316:G:A ENSG00000105053  
rs10423245:50505423:G:C:ENSG00000105053 0.035322296 0.631133206  
0.710954776 0.466610843 0.410008196 0.497503372  
rs10423245:50505423:G:C ENSG00000105053  
rs141724231:50505549:A:AGG:ENSG00000105053 0.035322296 0.537967079  
0.609676623 0.123210094 0.069942274 0.108665807  
rs141724231:50505549:A:AGG ENSG00000105053  
rs10423126:50505571:C:T:ENSG00000105053 0.035322296 0.537967079  
0.611290285 0.123210094 0.069942274 0.108665807  
rs10423126:50505571:C:T ENSG00000105053  
rs28695592:50505797:G:A:ENSG00000105053 0.035322296 0.537967079  
0.611290285 0.123210094 0.069942274 0.108665807  
rs28695592:50505797:G:A ENSG00000105053  
rs10403001:50505996:C:T:ENSG00000105053 0.035322296 0.555252837  
0.618696386 0.276782326 0.069942274 0.269135872  
rs10403001:50505996:C:T ENSG00000105053  
rs10403418:50506135:C:T:ENSG00000105053 0.035322296 0.597037291 0.65652076  
0.350892299 0.237095457 0.319318857 rs10403418:50506135:C:T  
ENSG00000105053  
rs10403900:50506321:C:G:ENSG00000105053 0.035322296 0.618523  
0.685268659 0.445043357 0.328523647 0.469127215  
rs10403900:50506321:C:G ENSG00000105053  
rs73935135:50506872:C:T:ENSG00000105053 0.035322296 0.607630844  
0.675900586 0.447551187 0.311775972 0.467974804  
rs73935135:50506872:C:T ENSG00000105053  
rs73935136:50507113:T:C:ENSG00000105053 0.035322296 0.605632687  
0.674171317 0.445043357 0.288162171 0.467974804  
rs73935136:50507113:T:C ENSG00000105053  
rs10411332:50507196:G:A:ENSG00000105053 0.035322296 0.509235376  
0.580001614 0.123210094 0.069942274 0.108665807  
rs10411332:50507196:G:A ENSG00000105053

rs10411542:50507281:G:A:ENSG00000105053 0.035322296 0.552128457  
0.618696386 0.165229468 0.069942274 0.140342165  
rs10411542:50507281:G:A ENSG00000105053  
rs10411204:50507336:A:G:ENSG00000105053 0.035322296 0.555252837  
0.618696386 0.165229468 0.069942274 0.140342165  
rs10411204:50507336:A:G ENSG00000105053  
rs10412963:50507361:T:G:ENSG00000105053 0.035322296 0.563654004  
0.618696386 0.333474506 0.069942274 0.282646046  
rs10412963:50507361:T:G ENSG00000105053  
rs10411985:50507495:G:C:ENSG00000105053 0.035322296 0.56559224  
0.618696386 0.340834261 0.148497947 0.269135872  
rs10411985:50507495:G:C ENSG00000105053  
rs56154904:50507504:T:G:ENSG00000105053 0.035322296 0.606705251  
0.674868706 0.419678998 0.251839208 0.441545027  
rs56154904:50507504:T:G ENSG00000105053  
rs56229440:50507535:C:T:ENSG00000105053 0.035322296 0.563654004  
0.618696386 0.333474506 0.148497947 0.319318857  
rs56229440:50507535:C:T ENSG00000105053  
rs28594879:50507584:T:C:ENSG00000105053 0.035322296 0.607630844  
0.674868706 0.419678998 0.251839208 0.441545027  
rs28594879:50507584:T:C ENSG00000105053  
rs28416420:50507678:T:C:ENSG00000105053 0.035322296 0.607630844  
0.674762224 0.424824518 0.251839208 0.441545027  
rs28416420:50507678:T:C ENSG00000105053  
rs28637413:50507774:G:C:ENSG00000105053 0.035322296 0.635828582  
0.683867068 0.459055393 0.279727316 0.460921055  
rs28637413:50507774:G:C ENSG00000105053  
rs28447400:50507827:C:T:ENSG00000105053 0.035322296 0.604833185  
0.668344684 0.399004389 0.218559406 0.401203391  
rs28447400:50507827:C:T ENSG00000105053  
rs77184646:50508154:G:A:ENSG00000105053 0.035322296 0.607630844  
0.674762224 0.450346002 0.237095457 0.453831125  
rs77184646:50508154:G:A ENSG00000105053  
rs114504678:50509638:A:C:ENSG00000105053 0.035322296 0.607630844  
0.674762224 0.450346002 0.237095457 0.453831125  
rs114504678:50509638:A:C ENSG00000105053  
rs201998359:50509639:AT:A:ENSG00000105053 0.035322296 0.635547176  
0.71850039 0.441817908 0.311775972 0.460921055  
rs201998359:50509639:AT:A ENSG00000105053  
rs148935239:50509790:A:G:ENSG00000105053 0.035322296 0.603890882  
0.666514548 0.36680942 0.237095457 0.347302535  
rs148935239:50509790:A:G ENSG00000105053  
rs58558256:50509914:G:A:ENSG00000105053 0.035322296 0.607882402  
0.678642404 0.408307051 0.328523647 0.423659401  
rs58558256:50509914:G:A ENSG00000105053  
rs7249301:50510604:C:T:ENSG00000105053 0.035322296 0.607882402  
0.677261746 0.408307051 0.328523647 0.423659401  
rs7249301:50510604:C:T ENSG00000105053  
rs11547883:ENSG00000105053 0.035322296 0.60953669 0.678642404  
0.408307051 0.328523647 0.423659401 rs11547883 ENSG00000105053  
exml493371:ENSG00000105053 0.035322296 0.60953669 0.678642404  
0.408307051 0.328523647 0.423659401 exml493371 ENSG00000105053

rs35914377:50511183:G:A:ENSG00000105053 0.035322296 0.629866286  
0.709425259 0.438119062 0.347424829 0.441545027  
rs35914377:50511183:G:A ENSG00000105053  
rs73935141:50512274:G:A:ENSG00000105053 0.035322296 0.621195464  
0.778199855 0.399004389 0.484480155 0.51457021  
rs73935141:50512274:G:A ENSG00000105053  
rs16981659:50512316:G:A:ENSG00000105053 0.035322296 0.651399716  
0.827435543 0.469436994 0.603364769 0.615926697  
rs16981659:50512316:G:A ENSG00000105053  
exml493378:ENSG00000105053 0.035322296 0.643711938 0.80525444  
0.463396258 0.565674613 0.603453089 exml493378 ENSG00000105053  
rs59977614:50513140:G:C:ENSG00000105053 0.035322296 0.629866286  
0.709425259 0.438119062 0.347424829 0.441545027  
rs59977614:50513140:G:C ENSG00000105053  
rs60638840:50513280:C:T:ENSG00000105053 0.035322296 0.629866286  
0.709425259 0.438119062 0.347424829 0.441545027  
rs60638840:50513280:C:T ENSG00000105053  
rs12151038:50513318:C:T:ENSG00000204666 0.035322296 0.281740211  
0.090437058 0.350892299 0.525520858 0.295623551  
rs12151038:50513318:C:T ENSG00000204666  
rs10416613:50513377:C:T:ENSG00000105053 0.035322296 0.572794149 0.63054575  
0.333474506 0.218559406 0.295623551 rs10416613:50513377:C:T  
ENSG00000105053  
rs10416851:50513565:A:G:ENSG00000105053 0.035322296 0.578883077  
0.640107889 0.358702521 0.198669295 0.347302535  
rs10416851:50513565:A:G ENSG00000105053  
rs10417047:50513586:C:T:ENSG00000105053 0.035322296 0.629866286  
0.709425259 0.441817908 0.347424829 0.441545027  
rs10417047:50513586:C:T ENSG00000105053  
rs10417044:50513620:A:G:ENSG00000105053 0.035322296 0.629866286  
0.709425259 0.438119062 0.347424829 0.441545027  
rs10417044:50513620:A:G ENSG00000105053  
19:50513635-T-C:ENSG00000105053 0.035322296 0.572794149 0.628778955  
0.333474506 0.218559406 0.295623551 19:50513635-T-C ENSG00000105053  
rs10422826:50513882:C:A:ENSG00000105053 0.035322296 0.629866286  
0.709425259 0.441817908 0.347424829 0.441545027  
rs10422826:50513882:C:A ENSG00000105053  
rs60214147:50514261:C:CT:ENSG00000105053 0.035322296 0.629866286  
0.709425259 0.441817908 0.347424829 0.441545027  
rs60214147:50514261:C:CT ENSG00000105053  
rs58889703:50514289:G:A:ENSG00000105053 0.035322296 0.629866286  
0.709425259 0.441817908 0.347424829 0.441545027  
rs58889703:50514289:G:A ENSG00000105053  
rs60774863:50514336:G:A:ENSG00000105053 0.035322296 0.578883077  
0.638829519 0.340834261 0.218559406 0.295623551  
rs60774863:50514336:G:A ENSG00000105053  
rs73935143:50515206:G:A:ENSG00000105053 0.035322296 0.629866286  
0.709425259 0.441817908 0.347424829 0.441545027  
rs73935143:50515206:G:A ENSG00000105053  
rs78109736:50515311:C:T:ENSG00000105053 0.035322296 0.629866286  
0.709425259 0.441817908 0.347424829 0.441545027  
rs78109736:50515311:C:T ENSG00000105053

rs10405404:50515456:C:T:ENSG00000105053 0.035322296 0.629866286  
0.709425259 0.441817908 0.347424829 0.441545027  
rs10405404:50515456:C:T ENSG00000105053  
JHU\_19.50515576:ENSG00000105053 0.035322296 0.628930054 0.708429962  
0.429269101 0.347424829 0.441545027 JHU\_19.50515576 ENSG00000105053  
rs10405664:50515579:C:T:ENSG00000105053 0.035322296 0.572794149 0.63054575  
0.333474506 0.218559406 0.295623551 rs10405664:50515579:C:T  
ENSG00000105053  
JHU\_19.50515592:ENSG00000105053 0.035322296 0.629866286 0.709425259  
0.441817908 0.347424829 0.441545027 JHU\_19.50515592 ENSG00000105053  
rs10407701:50515804:T:G:ENSG00000105053 0.035322296 0.572794149 0.63054575  
0.333474506 0.218559406 0.295623551 rs10407701:50515804:T:G  
ENSG00000105053  
rs10411894:50515880:G:A:ENSG00000105053 0.035322296 0.572794149 0.63054575  
0.333474506 0.218559406 0.295623551 rs10411894:50515880:G:A  
ENSG00000105053  
rs28528240:50516146:C:T:ENSG00000105053 0.035322296 0.570701598  
0.626634581 0.333474506 0.218559406 0.319318857  
rs28528240:50516146:C:T ENSG00000105053  
rs28580557:50516410:C:T:ENSG00000105053 0.035322296 0.600790062  
0.655792554 0.406267798 0.300892226 0.431187426  
rs28580557:50516410:C:T ENSG00000105053  
rs28648807:50516528:A:G:ENSG00000105053 0.035322296 0.600158632 0.65900997  
0.406267798 0.300892226 0.431187426 rs28648807:50516528:A:G  
ENSG00000105053  
rs59088209:50516871:C:G:ENSG00000105053 0.035322296 0.632692665  
0.716164833 0.445043357 0.363699827 0.467974804  
rs59088209:50516871:C:G ENSG00000105053  
rs59731041:50517172:C:T:ENSG00000105053 0.035322296 0.651399716  
0.765578222 0.558498626 0.559581427 0.615926697  
rs59731041:50517172:C:T ENSG00000105053  
rs57368713:50517191:T:C:ENSG00000105053 0.035322296 0.600158632 0.65900997  
0.406267798 0.300892226 0.431187426 rs57368713:50517191:T:C  
ENSG00000105053  
rs76089359:50517212:A:G:ENSG00000105053 0.035322296 0.607882402  
0.674868706 0.408307051 0.288162171 0.438723573  
rs76089359:50517212:A:G ENSG00000105053  
rs74924314:50517249:C:A:ENSG00000105053 0.035322296 0.600158632 0.65900997  
0.406267798 0.300892226 0.431187426 rs74924314:50517249:C:A  
ENSG00000105053  
rs146258686:50517521:TA:T:ENSG00000105053 0.035322296 0.607882402  
0.674868706 0.408307051 0.288162171 0.438723573  
rs146258686:50517521:TA:T ENSG00000105053  
rs10422211:50517672:T:C:ENSG00000105053 0.035322296 0.629866286  
0.709425259 0.441817908 0.347424829 0.441545027  
rs10422211:50517672:T:C ENSG00000105053  
rs10420790:50517715:C:T:ENSG00000105053 0.035322296 0.607882402  
0.674868706 0.408307051 0.288162171 0.438723573  
rs10420790:50517715:C:T ENSG00000105053  
rs10421202:50517785:G:A:ENSG00000105053 0.035322296 0.629866286  
0.709425259 0.441817908 0.347424829 0.441545027  
rs10421202:50517785:G:A ENSG00000105053



rs10425966:50517815:A:C:ENSG00000105053 0.035322296 0.629866286  
0.709425259 0.441817908 0.347424829 0.441545027  
rs10425966:50517815:A:C ENSG00000105053  
rs10426566:50517899:G:T:ENSG00000105053 0.035322296 0.629866286  
0.709425259 0.441817908 0.347424829 0.441545027  
rs10426566:50517899:G:T ENSG00000105053  
19:50518571:A:AT:ENSG00000105053 0.035322296 0.646854489 0.799305445  
0.558498626 0.636822477 0.522761587 19:50518571:A:AT ENSG00000105053  
rs142980242:50518622:A:G:ENSG00000105053 0.035322296 0.607882402  
0.674868706 0.408307051 0.288162171 0.438723573  
rs142980242:50518622:A:G ENSG00000105053  
rs150658795:50518626:T:C:ENSG00000105053 0.035322296 0.629866286  
0.709425259 0.438119062 0.347424829 0.441545027  
rs150658795:50518626:T:C ENSG00000105053  
rs58551501:50518949:T:C:ENSG00000105053 0.035322296 0.607882402  
0.674868706 0.408307051 0.300892226 0.441545027  
rs58551501:50518949:T:C ENSG00000105053  
rs57515835:50519216:G:A:ENSG00000105053 0.035322296 0.607882402  
0.674868706 0.408307051 0.300892226 0.441545027  
rs57515835:50519216:G:A ENSG00000105053  
rs57723601:50519240:T:C:ENSG00000105053 0.035322296 0.607882402  
0.674868706 0.408307051 0.300892226 0.441545027  
rs57723601:50519240:T:C ENSG00000105053  
rs61311983:50520231:GAGGTT:G:ENSG00000105053 0.035322296 0.607882402  
0.674868706 0.408307051 0.300892226 0.441545027  
rs61311983:50520231:GAGGTT:G ENSG00000105053  
rs115732142:50520432:G:C:ENSG00000105053 0.035322296 0.607882402  
0.674868706 0.408307051 0.300892226 0.441545027  
rs115732142:50520432:G:C ENSG00000105053  
rs59720830:50520447:T:C:ENSG00000105053 0.035322296 0.628930054  
0.709425259 0.438119062 0.347424829 0.441545027  
rs59720830:50520447:T:C ENSG00000105053  
rs10418484:50520771:T:C:ENSG00000105053 0.035322296 0.610547431  
0.679533134 0.408307051 0.311775972 0.441545027  
rs10418484:50520771:T:C ENSG00000105053  
rs10417302:50520772:G:A:ENSG00000105053 0.035322296 0.610547431  
0.679533134 0.408307051 0.311775972 0.441545027  
rs10417302:50520772:G:A ENSG00000105053  
rs10416786:50520788:A:G:ENSG00000105053 0.035322296 0.632692665  
0.713452083 0.438119062 0.347424829 0.441545027  
rs10416786:50520788:A:G ENSG00000105053  
rs10423821:50520826:T:C:ENSG00000105053 0.035322296 0.62210204  
0.695869412 0.450346002 0.328523647 0.451526982  
rs10423821:50520826:T:C ENSG00000105053  
rs10423869:50520883:T:C:ENSG00000105053 0.035322296 0.628930054  
0.709425259 0.438119062 0.347424829 0.441545027  
rs10423869:50520883:T:C ENSG00000105053  
rs10424288:50521061:T:C:ENSG00000105053 0.035322296 0.607882402  
0.674868706 0.408307051 0.300892226 0.441545027  
rs10424288:50521061:T:C ENSG00000105053  
rs73935146:50521391:T:C:ENSG00000105053 0.035322296 0.607882402  
0.674868706 0.408307051 0.300892226 0.441545027  
rs73935146:50521391:T:C ENSG00000105053

rs73935147:50521476:C:T:ENSG00000105053 0.035322296 0.607882402  
0.674868706 0.408307051 0.300892226 0.441545027  
rs73935147:50521476:C:T ENSG00000105053  
rs16981691:50521660:A:C:ENSG00000105053 0.035322296 0.571275414  
0.626808341 0.333474506 0.218559406 0.319318857  
rs16981691:50521660:A:C ENSG00000105053  
rs55683678:50521751:T:C:ENSG00000105053 0.035322296 0.628930054  
0.710954776 0.438119062 0.347424829 0.441545027  
rs55683678:50521751:T:C ENSG00000105053  
rs56934989:50521838:T:C:ENSG00000105053 0.035322296 0.628930054  
0.709425259 0.438119062 0.347424829 0.441545027  
rs56934989:50521838:T:C ENSG00000105053  
rs61538099:50521850:G:C:ENSG00000105053 0.035322296 0.626068412  
0.708429962 0.438119062 0.347424829 0.441545027  
rs61538099:50521850:G:C ENSG00000105053  
rs57270300:50522052:C:CA:ENSG00000105053 0.035322296 0.57709595  
0.640107889 0.326422852 0.218559406 0.319318857  
rs57270300:50522052:C:CA ENSG00000105053  
rs60229698:50522194:G:C:ENSG00000105053 0.035322296 0.571275414  
0.628654228 0.326422852 0.218559406 0.319318857  
rs60229698:50522194:G:C ENSG00000105053  
rs188426931:50522321:C:T:ENSG00000105053 0.035322296 0.628930054  
0.709425259 0.438119062 0.347424829 0.441545027  
rs188426931:50522321:C:T ENSG00000105053  
rs192306884:50522379:A:G:ENSG00000105053 0.035322296 0.571275414  
0.628302745 0.333474506 0.218559406 0.319318857  
rs192306884:50522379:A:G ENSG00000105053  
rs148767095:50522391:C:T:ENSG00000105053 0.035322296 0.571275414  
0.628302745 0.333474506 0.218559406 0.319318857  
rs148767095:50522391:C:T ENSG00000105053  
rs182296059:50522464:A:T:ENSG00000105053 0.035322296 0.571275414  
0.628302745 0.333474506 0.218559406 0.319318857  
rs182296059:50522464:A:T ENSG00000105053  
rs147510483:50522482:C:T:ENSG00000105053 0.035322296 0.58514239  
0.625050185 0.350892299 0.148497947 0.369977602  
rs147510483:50522482:C:T ENSG00000105053  
rs140355106:50522546:A:G:ENSG00000105053 0.035322296 0.628930054  
0.709425259 0.438119062 0.347424829 0.441545027  
rs140355106:50522546:A:G ENSG00000105053  
rs75805849:50523024:C:G:ENSG00000105053 0.035322296 0.628930054  
0.710954776 0.438119062 0.347424829 0.441545027  
rs75805849:50523024:C:G ENSG00000105053  
rs145134642:50523156:G:A:ENSG00000105053 0.035322296 0.628930054  
0.709425259 0.438119062 0.347424829 0.441545027  
rs145134642:50523156:G:A ENSG00000105053  
rs28601875:50523365:T:C:ENSG00000105053 0.035322296 0.571275414  
0.628302745 0.333474506 0.218559406 0.319318857  
rs28601875:50523365:T:C ENSG00000105053  
rs28363699:50523367:A:G:ENSG00000105053 0.035322296 0.604833185  
0.671106111 0.424824518 0.279727316 0.441545027  
rs28363699:50523367:A:G ENSG00000105053  
rs28687150:50523544:C:T:ENSG00000105053 0.035322296 0.571275414  
0.628302745 0.333474506 0.218559406 0.319318857  
rs28687150:50523544:C:T ENSG00000105053

rs28542894:50523623:T:G:ENSG00000105053 0.035322296 0.571275414  
0.628302745 0.333474506 0.218559406 0.319318857  
rs28542894:50523623:T:G ENSG00000105053  
JHU\_19.50523625:ENSG00000105053 0.035322296 0.628930054 0.709425259  
0.438119062 0.347424829 0.441545027 JHU\_19.50523625 ENSG00000105053  
JHU\_19.50523632:ENSG00000105053 0.035322296 0.651399716 0.747767793  
0.519043541 0.467095788 0.569708815 JHU\_19.50523632 ENSG00000105053  
rs28656909:50523654:A:G:ENSG00000105053 0.035322296 0.568032122  
0.621329859 0.350892299 0.148497947 0.295623551  
rs28656909:50523654:A:G ENSG00000105053  
rs10500302:50523722:T:C:ENSG00000105053 0.035322296 0.568032122  
0.621329859 0.350892299 0.148497947 0.295623551  
rs10500302:50523722:T:C ENSG00000105053  
rs28416898:50524797:C:G:ENSG00000105053 0.035322296 0.645915879  
0.736223303 0.496527133 0.455878819 0.563139599  
rs28416898:50524797:C:G ENSG00000105053  
rs28720999:50525002:T:G:ENSG00000105053 0.035322296 0.645915879  
0.736223303 0.496527133 0.455878819 0.563139599  
rs28720999:50525002:T:G ENSG00000105053  
rs28446996:50525009:G:A:ENSG00000105053 0.035322296 0.645915879  
0.738200785 0.496527133 0.455878819 0.56328436  
rs28446996:50525009:G:A ENSG00000105053  
rs61380983:50525196:G:T:ENSG00000105053 0.035322296 0.628930054  
0.709425259 0.438119062 0.347424829 0.441545027  
rs61380983:50525196:G:T ENSG00000105053  
rs60827350:50525353:C:T:ENSG00000105053 0.035322296 0.645915879  
0.736223303 0.496527133 0.455878819 0.563139599  
rs60827350:50525353:C:T ENSG00000105053  
rs10414564:50525640:C:G:ENSG00000105053 0.035322296 0.651399716  
0.752478809 0.517229412 0.490050927 0.569708815  
rs10414564:50525640:C:G ENSG00000105053  
rs10416182:50525698:T:A:ENSG00000105053 0.035322296 0.566392291  
0.618696386 0.333474506 0.148497947 0.308405655  
rs10416182:50525698:T:A ENSG00000105053  
rs10415168:50525781:G:A:ENSG00000105053 0.035322296 0.628930054  
0.709425259 0.438119062 0.347424829 0.441545027  
rs10415168:50525781:G:A ENSG00000105053  
rs10420596:50525912:G:A:ENSG00000105053 0.035322296 0.56559224  
0.618696386 0.314254491 0.148497947 0.295623551  
rs10420596:50525912:G:A ENSG00000105053  
rs10420278:50525956:C:T:ENSG00000105053 0.035322296 0.566392291  
0.618696386 0.333474506 0.148497947 0.319318857  
rs10420278:50525956:C:T ENSG00000105053  
rs60002760:50526221:C:CA:ENSG00000105053 0.035322296 0.566392291  
0.618696386 0.333474506 0.148497947 0.319318857  
rs60002760:50526221:C:CA ENSG00000105053  
rs115779557:50526251:A:G:ENSG00000105053 0.035322296 0.566392291  
0.618696386 0.333474506 0.148497947 0.319318857  
rs115779557:50526251:A:G ENSG00000105053  
rs114425365:50526252:A:C:ENSG00000105053 0.035322296 0.590785513  
0.651320451 0.408307051 0.251839208 0.401203391  
rs114425365:50526252:A:C ENSG00000105053

rs60536986:50526278:T:C:ENSG00000105053 0.035322296 0.591220107  
0.651509705 0.406267798 0.251839208 0.414364157  
rs60536986:50526278:T:C ENSG00000105053  
rs56821693:50526344:C:A:ENSG00000105053 0.035322296 0.590785513  
0.650184334 0.350892299 0.173591669 0.269135872  
rs56821693:50526344:C:A ENSG00000105053  
rs59698565:50526345:T:C:ENSG00000105053 0.035322296 0.590785513  
0.650184334 0.350892299 0.173591669 0.269135872  
rs59698565:50526345:T:C ENSG00000105053  
rs200170434:50526994:GGT:G:ENSG00000105053 0.035322296 0.616712847  
0.686442642 0.406267798 0.300892226 0.419171564  
rs200170434:50526994:GGT:G ENSG00000105053  
19:50526998:G:C:ENSG00000105053 0.035322296 0.616712847 0.686442642  
0.406267798 0.300892226 0.419171564 19:50526998:G:C ENSG00000105053  
rs11880872:50527043:A:G:ENSG00000105053 0.035322296 0.602208356  
0.601406435 0.333474506 0.173591669 0.24867752  
rs11880872:50527043:A:G ENSG00000105053  
rs10402421:50527442:A:G:ENSG00000105053 0.035322296 0.57709595  
0.637161235 0.358702521 0.173591669 0.333543658  
rs10402421:50527442:A:G ENSG00000105053  
rs10409358:50527913:G:A:ENSG00000105053 0.035322296 0.590785513  
0.650184334 0.350892299 0.173591669 0.269135872  
rs10409358:50527913:G:A ENSG00000105053  
rs10410818:50528062:T:G:ENSG00000105053 0.035322296 0.603890882  
0.666514548 0.385352708 0.198669295 0.333543658  
rs10410818:50528062:T:G ENSG00000105053  
rs10411239:50528233:T:C:ENSG00000105053 0.035322296 0.604833185  
0.671660261 0.401539023 0.300892226 0.419171564  
rs10411239:50528233:T:C ENSG00000105053  
rs10410111:50528284:G:A:ENSG00000105053 0.035322296 0.604833185  
0.671660261 0.401539023 0.300892226 0.419171564  
rs10410111:50528284:G:A ENSG00000105053  
rs10410420:50528594:C:T:ENSG00000105053 0.035322296 0.604833185  
0.671660261 0.401539023 0.300892226 0.419171564  
rs10410420:50528594:C:T ENSG00000105053  
19:50528696-T-C:ENSG00000105053 0.035322296 0.604833185 0.671660261  
0.401539023 0.300892226 0.419171564 19:50528696-T-C ENSG00000105053  
rs73935150:50528787:T:G:ENSG00000105053 0.035322296 0.604833185  
0.668344684 0.395341642 0.266901314 0.390568128  
rs73935150:50528787:T:G ENSG00000105053  
rs144949081:50528949:CCTTA:C:ENSG00000105053 0.035322296 0.604833185  
0.671660261 0.401539023 0.300892226 0.419171564  
rs144949081:50528949:CCTTA:C ENSG00000105053  
rs56660415:50529104:A:ACT:ENSG00000105053 0.035322296 0.604833185  
0.671660261 0.401539023 0.300892226 0.419171564  
rs56660415:50529104:A:ACT ENSG00000105053  
rs58602067:50529356:G:A:ENSG00000105053 0.035322296 0.604833185  
0.671660261 0.401539023 0.300892226 0.419171564  
rs58602067:50529356:G:A ENSG00000105053  
rs8108728:50529557:A:G:ENSG00000105053 0.035322296 0.605632687  
0.672834733 0.401539023 0.300892226 0.419171564  
rs8108728:50529557:A:G ENSG00000105053

rs11386821:50529603:G:GA:ENSG00000105053 0.035322296 0.603890882  
0.664963743 0.399004389 0.300892226 0.401203391  
rs11386821:50529603:G:GA ENSG00000105053  
rs8109020:50529713:C:G:ENSG00000105053 0.035322296 0.604833185  
0.671660261 0.401539023 0.300892226 0.419171564  
rs8109020:50529713:C:G ENSG00000105053  
rs8109836:50529739:T:C:ENSG00000105053 0.035322296 0.59034627  
0.650184334 0.340834261 0.173591669 0.269135872  
rs8109836:50529739:T:C ENSG00000105053  
rs8112214:50529943:G:C:ENSG00000105053 0.035322296 0.604833185  
0.671106111 0.401539023 0.300892226 0.419171564  
rs8112214:50529943:G:C ENSG00000105053  
19:50530289-T-C:ENSG00000105053 0.035322296 0.604833185 0.671106111  
0.401539023 0.300892226 0.419171564 19:50530289-T-C ENSG00000105053  
rs10425282:50530705:C:T:ENSG00000105053 0.035322296 0.604833185  
0.671106111 0.401539023 0.300892226 0.419171564  
rs10425282:50530705:C:T ENSG00000105053  
rs143780611:50530964:GT:G:ENSG00000105053 0.035322296 0.604833185  
0.671106111 0.401539023 0.300892226 0.419171564  
rs143780611:50530964:GT:G ENSG00000105053  
rs10406823:50531105:T:C:ENSG00000105053 0.035322296 0.563654004  
0.618696386 0.290136921 0.173591669 0.24867752  
rs10406823:50531105:T:C ENSG00000105053  
rs10405466:50531188:C:T:ENSG00000105053 0.035322296 0.628196016  
0.707238467 0.455203609 0.363699827 0.487204938  
rs10405466:50531188:C:T ENSG00000105053  
rs28677916:50531281:T:C:ENSG00000105053 0.035322296 0.654488658  
0.760866298 0.491850645 0.490050927 0.563139599  
rs28677916:50531281:T:C ENSG00000105053  
rs28372420:50531540:A:G:ENSG00000105053 0.035322296 0.624868528  
0.704400012 0.481611326 0.445056985 0.497503372  
rs28372420:50531540:A:G ENSG00000105053  
rs60810248:50531772:AT:A:ENSG00000105053 0.035322296 0.624238809  
0.683035763 0.459055393 0.445056985 0.494607223  
rs60810248:50531772:AT:A ENSG00000105053  
rs10439113:50531946:A:G:ENSG00000105053 0.035322296 0.633580657  
0.716164833 0.491850645 0.472198515 0.532059322  
rs10439113:50531946:A:G ENSG00000105053  
rs147669843:50532424:G:A:ENSG00000105053 0.035322296 0.632692665  
0.713452083 0.478009532 0.438540244 0.503271951  
rs147669843:50532424:G:A ENSG00000105053  
rs76856727:50532462:C:A:ENSG00000105053 0.035322296 0.632005909  
0.712504133 0.478009532 0.455878819 0.506819053  
rs76856727:50532462:C:A ENSG00000105053  
rs144667688:50532574:A:G:ENSG00000105053 0.035322296 0.628930054  
0.708429962 0.478009532 0.467095788 0.506819053  
rs144667688:50532574:A:G ENSG00000105053  
rs146171887:50532683:A:G:ENSG00000105053 0.035322296 0.629866286  
0.712504133 0.491850645 0.484480155 0.52739468  
rs146171887:50532683:A:G ENSG00000105053  
rs59552263:50532894:C:T:ENSG00000105053 0.035322296 0.614466288  
0.681949548 0.466610843 0.395007577 0.497503372  
rs59552263:50532894:C:T ENSG00000105053

rs10422354:50532917:A:G:ENSG00000105053 0.035322296 0.63739825  
0.721465596 0.491850645 0.467095788 0.547086582  
rs10422354:50532917:A:G ENSG00000105053  
rs60448139:50532939:G:A:ENSG00000105053 0.035322296 0.615606804 0.65652076  
0.429269101 0.251839208 0.401203391 rs60448139:50532939:G:A  
ENSG00000105053  
rs10422936:50532972:G:A:ENSG00000105053 0.035322296 0.610547431  
0.679533134 0.438119062 0.347424829 0.467974804  
rs10422936:50532972:G:A ENSG00000105053  
rs8112474:50533194:T:C:ENSG00000105053 0.035322296 0.60953669  
0.678642404 0.435112224 0.340307796 0.460921055  
rs8112474:50533194:T:C ENSG00000105053  
rs8112178:50533425:G:T:ENSG00000105053 0.035322296 0.607882402  
0.677261746 0.435112224 0.340307796 0.457928806  
rs8112178:50533425:G:T ENSG00000105053  
rs11083998:50533767:C:A:ENSG00000105053 0.035322296 0.607882402  
0.675900586 0.435112224 0.340307796 0.457928806  
rs11083998:50533767:C:A ENSG00000105053  
rs11083999:50534229:T:C:ENSG00000105053 0.035322296 0.607882402  
0.677261746 0.419678998 0.288162171 0.441545027  
rs11083999:50534229:T:C ENSG00000105053  
rs58435652:50534556:C:T:ENSG00000105053 0.035322296 0.599639892  
0.657729896 0.432896498 0.279727316 0.453831125  
rs58435652:50534556:C:T ENSG00000105053  
rs10405642:50534768:C:T:ENSG00000105053 0.035322296 0.604833185  
0.671660261 0.432896498 0.328523647 0.457928806  
rs10405642:50534768:C:T ENSG00000105053  
rs10413334:50535205:T:C:ENSG00000105053 0.035322296 0.604833185  
0.671106111 0.432896498 0.328523647 0.457928806  
rs10413334:50535205:T:C ENSG00000105053  
rs150208931:50535986:C:CT:ENSG00000105053 0.035322296 0.621180076  
0.689151367 0.429269101 0.311775972 0.447199093  
rs150208931:50535986:C:CT ENSG00000105053  
rs57711730:50536756:C:T:ENSG00000105053 0.035322296 0.623013991  
0.772899639 0.544839734 0.603710229 0.525367746  
rs57711730:50536756:C:T ENSG00000105053  
rs73935155:50536862:T:G:ENSG00000105053 0.035322296 0.618523  
0.689151367 0.491850645 0.420268827 0.510329036  
rs73935155:50536862:T:G ENSG00000105053  
rs73935156:50536884:T:A:ENSG00000105053 0.035322296 0.592406993 0.65418952  
0.326422852 0.173591669 0.308405655 rs73935156:50536884:T:A  
ENSG00000105053  
rs11880683:50536929:C:T:ENSG00000105053 0.035322296 0.583196386  
0.645109255 0.36680942 0.198669295 0.358316132  
rs11880683:50536929:C:T ENSG00000105053  
rs11878219:50537085:T:C:ENSG00000105053 0.035322296 0.629866286  
0.714717525 0.491850645 0.429827068 0.522761587  
rs11878219:50537085:T:C ENSG00000105053  
rs10408078:50538126:G:C:ENSG00000105053 0.035322296 0.597037291  
0.657729896 0.419678998 0.251839208 0.419171564  
rs10408078:50538126:G:C ENSG00000105053  
rs10407938:50538247:C:T:ENSG00000105053 0.035322296 0.575799627  
0.637161235 0.37163762 0.218559406 0.358316132  
rs10407938:50538247:C:T ENSG00000105053



rs10408370:50538287:G:T:ENSG00000105053 0.035322296 0.64771467  
0.739251903 0.491850645 0.381322091 0.510329036  
rs10408370:50538287:G:T ENSG00000105053  
rs78682540:50539314:A:C:ENSG00000105053 0.035322296 0.646854489  
0.739251903 0.491850645 0.381322091 0.510329036  
rs78682540:50539314:A:C ENSG00000105053  
rs145711982:50539475:T:C:ENSG00000105053 0.035322296 0.646854489  
0.739251903 0.491850645 0.381322091 0.510329036  
rs145711982:50539475:T:C ENSG00000105053  
rs60740879:50539639:T:C:ENSG00000105053 0.035322296 0.643711938  
0.732120658 0.491850645 0.395007577 0.511827661  
rs60740879:50539639:T:C ENSG00000105053  
rs58492510:50539656:T:C:ENSG00000105053 0.035322296 0.636565017  
0.721465596 0.466610843 0.363699827 0.471730191  
rs58492510:50539656:T:C ENSG00000105053  
rs57997248:50539782:T:C:ENSG00000105053 0.035322296 0.632005909  
0.713452083 0.463396258 0.328523647 0.476127813  
rs57997248:50539782:T:C ENSG00000105053  
rs59716573:50539791:C:T:ENSG00000105053 0.035322296 0.632692665  
0.713452083 0.463396258 0.328523647 0.476127813  
rs59716573:50539791:C:T ENSG00000105053  
rs61217015:50539834:G:A:ENSG00000105053 0.035322296 0.616712847  
0.683867068 0.438119062 0.340307796 0.457928806  
rs61217015:50539834:G:A ENSG00000105053  
rs157549:50540071:C:T:ENSG00000105053 0.035322296 0.651399716 0.80410788  
0.558498626 0.672672971 0.547086582 rs157549:50540071:C:T  
ENSG00000105053  
rs10403049:50540975:A:G:ENSG00000105053 0.035322296 0.62003748  
0.693319897 0.478009532 0.381322091 0.494607223  
rs10403049:50540975:A:G ENSG00000105053  
rs140481100:50541085:C:CTCTG:ENSG00000105053 0.035322296 0.621180076  
0.693319897 0.478009532 0.381322091 0.494607223  
rs140481100:50541085:C:CTCTG ENSG00000105053  
rs75463469:50541477:A:G:ENSG00000105053 0.035322296 0.621180076  
0.691910845 0.478009532 0.381322091 0.494607223  
rs75463469:50541477:A:G ENSG00000105053  
rs28575737:50541609:G:C:ENSG00000105053 0.035322296 0.621180076  
0.691910845 0.478009532 0.381322091 0.494607223  
rs28575737:50541609:G:C ENSG00000105053  
rs10427079:50542716:T:C:ENSG00000105053 0.035322296 0.621180076  
0.693319897 0.478009532 0.381322091 0.494607223  
rs10427079:50542716:T:C ENSG00000105053  
rs57195202:50542737:AGC:A:ENSG00000105053 0.035322296 0.621180076  
0.693319897 0.478009532 0.381322091 0.494607223  
rs57195202:50542737:AGC:A ENSG00000105053  
rs10405885:50543125:G:A:ENSG00000105053 0.035322296 0.621180076  
0.693319897 0.476011459 0.381322091 0.494607223  
rs10405885:50543125:G:A ENSG00000105053  
rs10405907:50543148:G:A:ENSG00000105053 0.035322296 0.621180076  
0.693319897 0.476011459 0.381322091 0.494607223  
rs10405907:50543148:G:A ENSG00000105053  
rs10412562:50544043:A:G:ENSG00000105053 0.035322296 0.621180076  
0.693319897 0.476011459 0.381322091 0.494607223  
rs10412562:50544043:A:G ENSG00000105053

rs10419985:50544844:G:A:ENSG00000105053 0.035322296 0.621195464  
0.691910845 0.476011459 0.381322091 0.494607223  
rs10419985:50544844:G:A ENSG00000105053  
exm1493401:ENSG00000105053 0.035322296 0.621195464 0.693319897  
0.476011459 0.381322091 0.491393172 exm1493401 ENSG00000105053  
exm1493402:ENSG00000105053 0.035322296 0.621195464 0.693319897  
0.476011459 0.381322091 0.491393172 exm1493402 ENSG00000105053  
rs10420700:50545344:C:T:ENSG00000105053 0.035322296 0.621195464  
0.637161235 0.491850645 0.467095788 0.468334324  
rs10420700:50545344:C:T ENSG00000105053  
rs11882838:50545677:A:G:ENSG00000105053 0.035322296 0.621180076  
0.690411919 0.476011459 0.371793022 0.494607223  
rs11882838:50545677:A:G ENSG00000105053  
rs11882888:50545740:C:T:ENSG00000105053 0.035322296 0.621180076  
0.690411919 0.476011459 0.381322091 0.491393172  
rs11882888:50545740:C:T ENSG00000105053  
rs73932403:50545879:C:T:ENSG00000105053 0.035322296 0.621180076  
0.691910845 0.476011459 0.381322091 0.494607223  
rs73932403:50545879:C:T ENSG00000105053  
rs11883417:50545969:A:G:ENSG00000105053 0.035322296 0.621195464  
0.691910845 0.472415297 0.381322091 0.494607223  
rs11883417:50545969:A:G ENSG00000105053  
rs11881008:50546041:T:C:ENSG00000105053 0.035322296 0.621195464  
0.691910845 0.469436994 0.381322091 0.494607223  
rs11881008:50546041:T:C ENSG00000105053  
rs73932405:50546277:G:T:ENSG00000105053 0.035322296 0.623013991 0.69711943  
0.454179145 0.388754065 0.476127813 rs73932405:50546277:G:T  
ENSG00000105053  
rs151148846:50546514:A:G:ENSG00000105053 0.035322296 0.61756659  
0.683867068 0.435112224 0.266901314 0.447199093  
rs151148846:50546514:A:G ENSG00000105053  
rs141086406:50546633:G:A:ENSG00000105053 0.035322296 0.555252837  
0.618696386 0.226823504 0.069942274 0.140342165  
rs141086406:50546633:G:A ENSG00000105053  
rs116266419:50546648:T:C:ENSG00000105053 0.035322296 0.548404403  
0.618696386 0.197042097 0.069942274 0.174366738  
rs116266419:50546648:T:C ENSG00000105053  
rs73932406:50546835:G:A:ENSG00000105053 0.035322296 0.619608693  
0.689151367 0.432896498 0.266901314 0.451526982  
rs73932406:50546835:G:A ENSG00000105053  
rs149530081:50547107:T:TACTG:ENSG00000105053 0.035322296 0.62003748  
0.690411919 0.435112224 0.288162171 0.441545027  
rs149530081:50547107:T:TACTG ENSG00000105053  
rs10410738:50547773:G:A:ENSG00000105053 0.035322296 0.614466288  
0.683867068 0.438119062 0.266901314 0.441545027  
rs10410738:50547773:G:A ENSG00000105053  
exm1493403:ENSG00000105053 0.035322296 0.614466288 0.683867068  
0.438119062 0.266901314 0.441545027 exm1493403 ENSG00000105053  
exm1493413:ENSG00000105053 0.035322296 0.603890882 0.667476732  
0.395341642 0.198669295 0.347302535 exm1493413 ENSG00000105053  
exm1493423:ENSG00000105053 0.035322296 0.62210204 0.694666609  
0.447551187 0.363699827 0.471730191 exm1493423 ENSG00000105053  
exm1493426:ENSG00000105053 0.035322296 0.62210204 0.694666609  
0.447551187 0.363699827 0.471730191 exm1493426 ENSG00000105053

exml493434:ENSG00000105053 0.035322296 0.604833185 0.672834733  
0.458827356 0.347424829 0.467974804 exml493434 ENSG00000105053  
rs10419043:50548687:T:C:ENSG00000105053 0.035322296 0.604833185  
0.671660261 0.401539023 0.328523647 0.419171564  
rs10419043:50548687:T:C ENSG00000105053  
rs60764032:50548918:C:T:ENSG00000105053 0.035322296 0.62210204  
0.694666609 0.447551187 0.363699827 0.471730191  
rs60764032:50548918:C:T ENSG00000105053  
rs10424220:50549461:A:G:ENSG00000105053 0.035322296 0.555150776  
0.618696386 0.197042097 0.069942274 0.140342165  
rs10424220:50549461:A:G ENSG00000105053  
exml493487:ENSG00000105053 0.035322296 0.626739008 0.704400012  
0.459055393 0.363699827 0.4815871 exml493487 ENSG00000105053  
exml493489:ENSG00000105053 0.035322296 0.604833185 0.674762224  
0.429269101 0.288162171 0.438723573 exml493489 ENSG00000105053  
rs11881187:50550127:A:G:ENSG00000105053 0.035322296 0.574428997  
0.634291162 0.414104514 0.251839208 0.438723573  
rs11881187:50550127:A:G ENSG00000105053  
rs9304701:50550811:C:T:ENSG00000105053 0.035322296 0.603890882  
0.666514548 0.432896498 0.288162171 0.451526982  
rs9304701:50550811:C:T ENSG00000105053  
rs16981716:50551051:T:C:ENSG00000105053 0.035322296 0.62210204 0.69711943  
0.491850645 0.381322091 0.497503372 rs16981716:50551051:T:C  
ENSG00000105053  
rs10412271:50551201:A:G:ENSG00000105053 0.035322296 0.604833185  
0.668344684 0.458827356 0.371793022 0.477177495  
rs10412271:50551201:A:G ENSG00000105053  
rs10413068:50551302:G:C:ENSG00000105053 0.035322296 0.621583901  
0.695869412 0.469436994 0.340307796 0.4815871  
rs10413068:50551302:G:C ENSG00000105053  
rs144085038:50551353:C:CAGAA:ENSG00000105053 0.035322296 0.604833185  
0.668344684 0.455203609 0.363699827 0.471730191  
rs144085038:50551353:C:CAGAA ENSG00000105053  
rs10415125:50551665:T:C:ENSG00000105053 0.035322296 0.600158632  
0.657729896 0.432896498 0.311775972 0.453831125  
rs10415125:50551665:T:C ENSG00000105053  
rs15189:ENSG00000105053 0.035322296 0.58514239 0.645109255  
0.408307051 0.328523647 0.441545027 rs15189 ENSG00000105053  
rs10406698:50551932:G:A:ENSG00000105053 0.035322296 0.560196984  
0.618696386 0.314254491 0.112902598 0.225997306  
rs10406698:50551932:G:A ENSG00000105053  
rs11878761:50552473:C:G:ENSG00000105053 0.035322296 0.623013991  
0.698688636 0.484670506 0.420268827 0.501122218  
rs11878761:50552473:C:G ENSG00000105053  
rs141207500:50552725:T:TTAAA:ENSG00000105053 0.035322296 0.62210204  
0.695869412 0.484670506 0.395007577 0.501122218  
rs141207500:50552725:T:TTAAA ENSG00000105053  
rs9973262:50552894:A:T:ENSG00000105053 0.035322296 0.624238809 0.70008691  
0.491850645 0.445056985 0.51457021 rs9973262:50552894:A:T  
ENSG00000105053  
rs371666786:50553367:GCTT:G:ENSG00000105053 0.035322296 0.624052474  
0.70008691 0.491850645 0.455878819 0.52739468  
rs371666786:50553367:GCTT:G ENSG00000105053

rs10415276:50553460:G:A:ENSG00000105053 0.035322296 0.624238809 0.70008691  
0.491850645 0.445056985 0.51457021 rs10415276:50553460:G:A  
ENSG00000105053

rs10416688:50553572:T:C:ENSG00000105053 0.035322296 0.621583901  
0.693319897 0.455203609 0.340307796 0.476127813  
rs10416688:50553572:T:C ENSG00000105053

rs10415604:50553809:C:T:ENSG00000105053 0.035322296 0.624238809 0.70008691  
0.491850645 0.455878819 0.52739468 rs10415604:50553809:C:T  
ENSG00000105053

rs58461157:50553877:TC:T:ENSG00000105053 0.035322296 0.624238809  
0.70008691 0.491850645 0.445056985 0.51457021  
rs58461157:50553877:TC:T ENSG00000105053

rs10421463:50553975:G:C:ENSG00000105053 0.035322296 0.624052474  
0.698688636 0.491850645 0.455878819 0.52739468  
rs10421463:50553975:G:C ENSG00000105053

rs11880182:50554201:C:T:ENSG00000105053 0.035322296 0.624238809 0.70008691  
0.491850645 0.445056985 0.51457021 rs11880182:50554201:C:T  
ENSG00000105053

rs10422147:50554238:G:A:ENSG00000105053 0.035322296 0.624238809 0.70008691  
0.491850645 0.445056985 0.51457021 rs10422147:50554238:G:A  
ENSG00000105053

19:50554711:G:<CN0>:50561348:ENSG00000105053 0.035322296 0.621195464  
0.691910845 0.458827356 0.328523647 0.468334324  
19:50554711:G:<CN0>:50561348 ENSG00000105053

rs55848232:50561424:T:A:ENSG00000105053 0.035322296 0.634930259  
0.740804717 0.509242766 0.484480155 0.52739468  
rs55848232:50561424:T:A ENSG00000105053

rs57867677:50561440:G:A:ENSG00000105053 0.035322296 0.632005909  
0.740552043 0.509242766 0.477032507 0.51457021  
rs57867677:50561440:G:A ENSG00000105053

rs58935183:50561659:C:T:ENSG00000105053 0.035322296 0.624238809 0.70008691  
0.491850645 0.445056985 0.51457021 rs58935183:50561659:C:T  
ENSG00000105053

rs60973487:50561779:A:G:ENSG00000105053 0.035322296 0.621195464  
0.691910845 0.458827356 0.328523647 0.468334324  
rs60973487:50561779:A:G ENSG00000105053

rs11879695:50562131:T:C:ENSG00000105053 0.035322296 0.621195464  
0.691910845 0.438119062 0.288162171 0.468334324  
rs11879695:50562131:T:C ENSG00000105053

19:50562175-T-C:ENSG00000105053 0.035322296 0.624238809 0.674171317  
0.442167795 0.237095457 0.517746279 19:50562175-T-C ENSG00000105053

rs11882324:50562464:C:A:ENSG00000105053 0.035322296 0.621195464  
0.691910845 0.438119062 0.288162171 0.468334324  
rs11882324:50562464:C:A ENSG00000105053

rs10424346:50563114:T:A:ENSG00000105053 0.035322296 0.603261923  
0.664963743 0.419678998 0.300892226 0.451526982  
rs10424346:50563114:T:A ENSG00000105053

rs10422999:50563220:C:A:ENSG00000105053 0.035322296 0.603261923  
0.664963743 0.419678998 0.311775972 0.451526982  
rs10422999:50563220:C:A ENSG00000105053

rs10424602:50563300:T:C:ENSG00000105053 0.035322296 0.621195464  
0.691910845 0.438119062 0.288162171 0.468334324  
rs10424602:50563300:T:C ENSG00000105053

rs10424805:50563406:T:C:ENSG00000105053 0.035322296 0.619608693  
0.686442642 0.435112224 0.340307796 0.447199093  
rs10424805:50563406:T:C ENSG00000105053  
rs10423709:50563545:C:T:ENSG00000105053 0.035322296 0.621180076  
0.690411919 0.435112224 0.340307796 0.447199093  
rs10423709:50563545:C:T ENSG00000105053  
rs10423788:50563698:A:G:ENSG00000105053 0.035322296 0.621180076  
0.690411919 0.435112224 0.340307796 0.447199093  
rs10423788:50563698:A:G ENSG00000105053  
rs10424489:50563726:G:A:ENSG00000105053 0.035322296 0.621180076  
0.690411919 0.435112224 0.340307796 0.447199093  
rs10424489:50563726:G:A ENSG00000105053  
rs28707533:50564059:C:T:ENSG00000105053 0.035322296 0.621180076  
0.690411919 0.435112224 0.340307796 0.451526982  
rs28707533:50564059:C:T ENSG00000105053  
rs28468531:50564088:C:T:ENSG00000105053 0.035322296 0.649779607  
0.641688238 0.395341642 0.288162171 0.308405655  
rs28468531:50564088:C:T ENSG00000105053  
rs28504051:50564214:A:G:ENSG00000105053 0.035322296 0.621195464  
0.691910845 0.438119062 0.340307796 0.453831125  
rs28504051:50564214:A:G ENSG00000105053  
rs145067293:50564413:A:AT:ENSG00000105053 0.035322296 0.621195464  
0.691910845 0.438119062 0.340307796 0.453831125  
rs145067293:50564413:A:AT ENSG00000105053  
19:50564704:GTTT:GTT:ENSG00000105053 0.035322296 0.621195464  
0.693319897 0.435112224 0.340307796 0.453831125 19:50564704:GTTT:GTT  
ENSG00000105053  
rs28658547:50564754:T:C:ENSG00000105053 0.035322296 0.621195464  
0.695869412 0.435112224 0.347424829 0.457928806  
rs28658547:50564754:T:C ENSG00000105053  
rs28754527:50564755:G:A:ENSG00000105053 0.035322296 0.621583901 0.69711943  
0.438119062 0.347424829 0.457928806 rs28754527:50564755:G:A  
ENSG00000105053  
rs10413512:50565321:T:C:ENSG00000105053 0.035322296 0.621180076  
0.693319897 0.442167795 0.347424829 0.460921055  
rs10413512:50565321:T:C ENSG00000105053  
rs10413762:50565473:T:G:ENSG00000105053 0.035322296 0.603890882  
0.667476732 0.399004389 0.237095457 0.419171564  
rs10413762:50565473:T:G ENSG00000105053  
rs28494717:50565851:C:T:ENSG00000105053 0.035322296 0.621583901  
0.693319897 0.445043357 0.381322091 0.467974804  
rs28494717:50565851:C:T ENSG00000105053  
rs78838446:50566513:G:A:ENSG00000105053 0.035322296 0.631133206  
0.712504133 0.459055393 0.381322091 0.471730191  
rs78838446:50566513:G:A ENSG00000105053  
rs78611692:50566613:G:C:ENSG00000105053 0.035322296 0.621180076  
0.693319897 0.445043357 0.381322091 0.467974804  
rs78611692:50566613:G:C ENSG00000105053  
rs77491219:50566763:T:C:ENSG00000105053 0.035322296 0.624712816  
0.701097355 0.445043357 0.371793022 0.471730191  
rs77491219:50566763:T:C ENSG00000105053  
rs28775570:50566968:A:G:ENSG00000105053 0.035322296 0.62003748  
0.689151367 0.447551187 0.371793022 0.467974804  
rs28775570:50566968:A:G ENSG00000105053

rs58165054:50567055: TG:T:ENSG00000105053 0.035322296 0.621180076  
0.687554362 0.445043357 0.381322091 0.467974804  
rs58165054:50567055: TG:T ENSG00000105053  
rs35133927:50567166:A:AAT:ENSG00000105053 0.035322296 0.62003748  
0.687554362 0.445043357 0.371793022 0.467974804  
rs35133927:50567166:A:AAT ENSG00000105053  
rs11880741:50567279:C:T:ENSG00000105053 0.035322296 0.62003748  
0.689151367 0.445043357 0.371793022 0.467974804  
rs11880741:50567279:C:T ENSG00000105053  
rs60342933:50567303:T:TA:ENSG00000105053 0.035322296 0.621180076  
0.689151367 0.445043357 0.371793022 0.467974804  
rs60342933:50567303:T:TA ENSG00000105053  
rs11880791:50567523:A:G:ENSG00000105053 0.035322296 0.596705968  
0.655792554 0.395341642 0.251839208 0.423659401  
rs11880791:50567523:A:G ENSG00000105053  
rs28721300:50567638:C:T:ENSG00000105053 0.035322296 0.59801686  
0.655792554 0.399004389 0.288162171 0.390568128  
rs28721300:50567638:C:T ENSG00000105053  
rs28422915:50567680:A:G:ENSG00000105053 0.035322296 0.595671165  
0.655792554 0.399004389 0.288162171 0.390568128  
rs28422915:50567680:A:G ENSG00000105053  
kgp9800030:ENSG00000105053 0.035322296 0.595671165 0.655792554  
0.399004389 0.288162171 0.390568128 kgp9800030 ENSG00000105053  
rs28469224:50567788:G:T:ENSG00000105053 0.035322296 0.596705968  
0.655792554 0.399004389 0.288162171 0.390568128  
rs28469224:50567788:G:T ENSG00000105053  
rs73932413:50568001:G:A:ENSG00000105053 0.035322296 0.596705968  
0.655792554 0.399004389 0.288162171 0.382106273  
rs73932413:50568001:G:A ENSG00000105053  
rs10407746:50568287:C:T:ENSG00000105053 0.035322296 0.654488658  
0.828759186 0.466610843 0.480692872 0.510329036  
rs10407746:50568287:C:T ENSG00000105053  
rs10408187:50568447:C:T:ENSG00000105053 0.035322296 0.654488658  
0.828327833 0.466610843 0.480692872 0.510329036  
rs10408187:50568447:C:T ENSG00000105053  
rs10408611:50568494:G:A:ENSG00000105053 0.035322296 0.654488658  
0.828327833 0.466610843 0.480692872 0.510329036  
rs10408611:50568494:G:A ENSG00000105053  
rs10408644:50568628:C:T:ENSG00000105053 0.035322296 0.654488658  
0.828759186 0.466610843 0.480692872 0.510329036  
rs10408644:50568628:C:T ENSG00000105053  
rs28408953:50570765:G:A:ENSG00000105053 0.035322296 0.603261923  
0.655792554 0.399004389 0.288162171 0.374953256  
rs28408953:50570765:G:A ENSG00000105053  
rs28537906:50571310:G:A:ENSG00000105053 0.035322296 0.602503447  
0.655792554 0.399004389 0.288162171 0.374953256  
rs28537906:50571310:G:A ENSG00000105053  
rs374378306:50571403:AAAAC:AAAACAAAC:ENSG00000105053 0.035322296  
0.602503447 0.655792554 0.399004389 0.279727316 0.382106273  
rs374378306:50571403:AAAAC:AAAACAAAC ENSG00000105053  
rs11881204:50572819:G:A:ENSG00000105053 0.035322296 0.602503447  
0.655792554 0.399004389 0.288162171 0.374953256  
rs11881204:50572819:G:A ENSG00000105053



rs35523621:50574737:TA:TAA:ENSG00000105053 0.035322296 0.603261923  
0.657729896 0.399004389 0.288162171 0.374953256  
rs35523621:50574737:TA:TAA:ENSG00000105053  
rs58295328:50574874:G:GC:ENSG00000105053 0.035322296 0.603261923  
0.655792554 0.399004389 0.288162171 0.382106273  
rs58295328:50574874:G:GC:ENSG00000105053  
rs10421083:50575433:G:A:ENSG00000105053 0.035322296 0.602503447  
0.655792554 0.399004389 0.288162171 0.374953256  
rs10421083:50575433:G:A:ENSG00000105053  
rs58975054:50575721:A:G:ENSG00000105053 0.035322296 0.602503447  
0.655792554 0.399004389 0.288162171 0.374953256  
rs58975054:50575721:A:G:ENSG00000105053  
rs80090024:50575999:G:T:ENSG00000105053 0.035322296 0.602503447  
0.655792554 0.399004389 0.288162171 0.374953256  
rs80090024:50575999:G:T:ENSG00000105053  
rs55808345:50576747:A:G:ENSG00000105053 0.035322296 0.602503447  
0.655792554 0.399004389 0.288162171 0.374953256  
rs55808345:50576747:A:G:ENSG00000105053  
rs56165131:50576959:C:T:ENSG00000105053 0.035322296 0.602503447  
0.655792554 0.399004389 0.288162171 0.374953256  
rs56165131:50576959:C:T:ENSG00000105053  
rs76794257:50577110:G:T:ENSG00000105053 0.035322296 0.603261923  
0.655792554 0.399004389 0.288162171 0.374953256  
rs76794257:50577110:G:T:ENSG00000105053  
rs367918715:50577449:GCAGAAAGAGAGGAAGGGAGAGGCC:G:ENSG00000105053  
0.035322296 0.602503447 0.655792554 0.406267798 0.288162171  
0.358316132 rs367918715:50577449:GCAGAAAGAGAGGAAGGGAGAGGCC:G  
ENSG00000105053  
JHU\_19.50577782:ENSG00000105053 0.035322296 0.651399716 0.660396949  
0.414104514 0.300892226 0.333543658 JHU\_19.50577782:ENSG00000105053  
rs73932419:50577889:A:G:ENSG00000105053 0.035322296 0.603890882 0.70008691  
0.326422852 0.279727316 0.295623551 rs73932419:50577889:A:G  
ENSG00000105053  
19:50579005:G:A:ENSG00000105053 0.035322296 0.618523 0.828327833  
0.466610843 0.480692872 0.494607223 19:50579005:G:A:ENSG00000105053  
rs146805943:50579355:AAAG:A:ENSG00000105053 0.035322296 0.58760415  
0.645217882 0.395341642 0.279727316 0.333543658  
rs146805943:50579355:AAAG:A:ENSG00000105053  
rs78554634:50580561:A:G:ENSG00000105053 0.035322296 0.665071191 0.84607387  
0.492233123 0.614364441 0.487204938 rs78554634:50580561:A:G  
ENSG00000105053  
rs28523367:50581404:G:A:ENSG00000105053 0.035322296 0.602503447  
0.655792554 0.399004389 0.288162171 0.374953256  
rs28523367:50581404:G:A:ENSG00000105053  
19:50581612:A:AAGAG:ENSG00000105053 0.035322296 0.618523  
0.761772115 0.512101623 0.54593522 0.497503372 19:50581612:A:AAGAG  
ENSG00000105053  
rs372342456:50581901:A:G:ENSG00000105053 0.035322296 0.571275414  
0.663257863 0.390584104 0.279727316 0.333543658  
rs372342456:50581901:A:G:ENSG00000105053  
rs200619699:50582004:AAAG:A:ENSG00000105053 0.035322296 0.602503447  
0.655792554 0.399004389 0.288162171 0.374953256  
rs200619699:50582004:AAAG:A:ENSG00000105053

rs10408185:50582187:T:C:ENSG00000105053 0.035322296 0.572794149  
0.666514548 0.379688866 0.173591669 0.308405655  
rs10408185:50582187:T:C ENSG00000105053  
19:50582414:T:C:ENSG00000105053 0.035322296 0.602503447 0.655792554  
0.399004389 0.288162171 0.374953256 19:50582414:T:C ENSG00000105053  
rs146164051:50582753:T:A:ENSG00000105053 0.035322296 0.56559224  
0.651509705 0.387628207 0.279727316 0.333543658  
rs146164051:50582753:T:A ENSG00000105053  
rs144485010:50583983:C:T:ENSG00000105053 0.035322296 0.602503447  
0.655792554 0.399004389 0.288162171 0.374953256  
rs144485010:50583983:C:T ENSG00000105053  
rs60315997:50584766:T:C:ENSG00000105053 0.035322296 0.602503447  
0.655792554 0.399004389 0.288162171 0.374953256  
rs60315997:50584766:T:C ENSG00000105053  
rs74182091:50585467:C:CA:ENSG00000105053 0.035322296 0.624712816  
0.680579361 0.385352708 0.300892226 0.447199093  
rs74182091:50585467:C:CA ENSG00000105053  
rs7250130:50585959:A:G:ENSG00000105053 0.035322296 0.602503447  
0.655792554 0.399004389 0.288162171 0.374953256  
rs7250130:50585959:A:G ENSG00000105053  
rs7251267:50586013:T:C:ENSG00000105053 0.035322296 0.391301538  
0.470302738 0.314254491 0.112902598 0.24867752  
rs7251267:50586013:T:C ENSG00000105053  
rs7250386:50586147:A:G:ENSG00000105053 0.035322296 0.623013991  
0.694666609 0.466610843 0.429827068 0.476127813  
rs7250386:50586147:A:G ENSG00000105053  
rs78816884:50586534:G:A:ENSG00000105053 0.035322296 0.62210204  
0.691910845 0.463396258 0.429827068 0.476127813  
rs78816884:50586534:G:A ENSG00000105053  
rs149110605:50586681:T:C:ENSG00000105053 0.035322296 0.602503447  
0.655792554 0.399004389 0.288162171 0.374953256  
rs149110605:50586681:T:C ENSG00000105053  
rs143151818:50586720:C:T:ENSG00000105053 0.035322296 0.604833185  
0.663257863 0.399004389 0.300892226 0.414364157  
rs143151818:50586720:C:T ENSG00000105053  
rs59394422:50587450:A:G:ENSG00000105053 0.035322296 0.602503447  
0.655792554 0.399004389 0.288162171 0.374953256  
rs59394422:50587450:A:G ENSG00000105053  
rs201469467:50587542:AT:A:ENSG00000105053 0.035322296 0.602503447  
0.655792554 0.399004389 0.288162171 0.374953256  
rs201469467:50587542:AT:A ENSG00000105053  
rs10401508:50588722:T:C:ENSG00000105053 0.035322296 0.602503447  
0.655792554 0.399004389 0.288162171 0.374953256  
rs10401508:50588722:T:C ENSG00000105053  
rs188748297:50589019:A:G:ENSG00000105053 0.035322296 0.563654004  
0.618696386 0.37163762 0.279727316 0.369977602  
rs188748297:50589019:A:G ENSG00000105053  
rs143256006:50589137:A:G:ENSG00000105053 0.035322296 0.569365854  
0.661919508 0.390584104 0.279727316 0.333543658  
rs143256006:50589137:A:G ENSG00000105053  
rs184927043:50589227:C:G:ENSG00000105053 0.035322296 0.602503447  
0.655792554 0.399004389 0.288162171 0.374953256  
rs184927043:50589227:C:G ENSG00000105053

rs188254493:50589345:G:C:ENSG00000105053 0.035322296 0.61756659  
0.674762224 0.419678998 0.363699827 0.457928806  
rs188254493:50589345:G:C ENSG00000105053  
rs8106662:50590384:A:G:ENSG00000105053 0.035322296 0.602503447  
0.655792554 0.399004389 0.288162171 0.374953256  
rs8106662:50590384:A:G ENSG00000105053  
rs7257061:50591235:C:T:ENSG00000105053 0.035322296 0.616712847  
0.756966764 0.551096242 0.57001038 0.503271951  
rs7257061:50591235:C:T ENSG00000105053  
rs7257211:50591348:C:T:ENSG00000105053 0.035322296 0.602503447  
0.655792554 0.399004389 0.288162171 0.374953256  
rs7257211:50591348:C:T ENSG00000105053  
rs7257411:50591355:G:A:ENSG00000105053 0.035322296 0.603890882 0.65652076  
0.395341642 0.218559406 0.369977602 rs7257411:50591355:G:A  
ENSG00000105053  
rs11882236:50592115:C:G:ENSG00000105053 0.035322296 0.604833185 0.65900997  
0.399004389 0.288162171 0.374953256 rs11882236:50592115:C:G  
ENSG00000105053  
rs10416029:50592578:A:G:ENSG00000105053 0.035322296 0.573615857  
0.671660261 0.399004389 0.288162171 0.333543658  
rs10416029:50592578:A:G ENSG00000105053  
rs10416773:50592691:G:C:ENSG00000105053 0.035322296 0.604833185  
0.663257863 0.401539023 0.288162171 0.374953256  
rs10416773:50592691:G:C ENSG00000105053  
rs10422921:50593121:G:T:ENSG00000105053 0.035322296 0.604833185  
0.668344684 0.406267798 0.288162171 0.382106273  
rs10422921:50593121:G:T ENSG00000105053  
rs142355017:50593367:G:T:ENSG00000105053 0.035322296 0.604833185  
0.668344684 0.406267798 0.288162171 0.382106273  
rs142355017:50593367:G:T ENSG00000105053  
rs11878351:50593842:A:C:ENSG00000105053 0.035322296 0.651399716  
0.613735952 0.419678998 0.251839208 0.419171564  
rs11878351:50593842:A:C ENSG00000105053  
19:50638726:C:T:ENSG00000105053 0.035322296 0.602503447 0.728288658  
0.466610843 0.504458419 0.438723573 19:50638726:C:T ENSG00000105053  
19:50642720:A:T:ENSG00000105053 0.035322296 0.681583873 0.837103534  
0.7815717 0.861392531 0.813853703 19:50642720:A:T ENSG00000105053  
rs34446688:50643321:T:A:ENSG00000105053 0.035322296 0.57709595  
0.771670385 0.49621531 0.54593522 0.441545027  
rs34446688:50643321:T:A ENSG00000105053  
rs115487435:50643555:A:G:ENSG00000105053 0.035322296 0.57709595  
0.771670385 0.49621531 0.54593522 0.441545027  
rs115487435:50643555:A:G ENSG00000105053  
rs114415709:50643558:C:T:ENSG00000105053 0.035322296 0.594149718  
0.781136655 0.520505218 0.54593522 0.453831125  
rs114415709:50643558:C:T ENSG00000105053  
rs138208418:50643645:GTCTCCC:G:ENSG00000105053 0.035322296 0.61756659  
0.761772115 0.507376693 0.54593522 0.497503372  
rs138208418:50643645:GTCTCCC:G ENSG00000105053  
rs28709104:50644269:T:C:ENSG00000105053 0.035322296 0.57709595  
0.771670385 0.49621531 0.54593522 0.441545027  
rs28709104:50644269:T:C ENSG00000105053

rs57154357:50645264:T:G:ENSG00000105053 0.035322296 0.57709595  
0.771670385 0.49621531 0.54593522 0.441545027  
rs57154357:50645264:T:G ENSG00000105053  
rs55806553:50645324:C:G:ENSG00000105053 0.035322296 0.57709595  
0.771670385 0.49621531 0.54593522 0.441545027  
rs55806553:50645324:C:G ENSG00000105053  
rs11280770:50645789:G:GAGACAGAGTC:ENSG00000105053 0.035322296  
0.569365854 0.839186759 0.53594117 0.641673925 0.510329036  
rs11280770:50645789:G:GAGACAGAGTC ENSG00000105053  
rs11280771:50645817:G:GTGTTGC:ENSG00000105053 0.035322296 0.57709595  
0.771670385 0.49621531 0.54593522 0.441545027  
rs11280771:50645817:G:GTGTTGC ENSG00000105053  
rs10414850:ENSG00000105053 0.035322296 0.505984373 0.791608149  
0.491850645 0.544223189 0.333543658 rs10414850 ENSG00000105053  
rs8107344:50648582:C:G:ENSG00000105053 0.035322296 0.562502946  
0.747767793 0.491850645 0.467095788 0.358316132  
rs8107344:50648582:C:G ENSG00000105053  
rs58248621:50649583:T:C:ENSG00000105053 0.035322296 0.5418066 0.6569085  
0.326422852 0.069942274 0.24867752 rs58248621:50649583:T:C  
ENSG00000105053  
rs10409245:50650877:A:G:ENSG00000105053 0.035322296 0.549880855  
0.672834733 0.37163762 0.279727316 0.319318857  
rs10409245:50650877:A:G ENSG00000105053  
rs61743455:50651485:A:C:ENSG00000204666 0.035322296 0.33968813  
0.269469279 0.459055393 0.625064162 0.616432465  
rs61743455:50651485:A:C ENSG00000204666  
rs10404214:50652095:C:T:ENSG00000204666 0.035322296 0.33968813  
0.269469279 0.459055393 0.636822477 0.616432465  
rs10404214:50652095:C:T ENSG00000204666  
rs28656072:50652492:C:G:ENSG00000204666 0.035322296 0.33968813  
0.269469279 0.459055393 0.635943247 0.619162849  
rs28656072:50652492:C:G ENSG00000204666  
rs28408383:50654623:T:C:ENSG00000204666 0.035322296 0.391301538  
0.255451763 0.333474506 0.589126514 0.60918994  
rs28408383:50654623:T:C ENSG00000204666  
rs10426920:50655200:G:A:ENSG00000204666 0.035322296 0.401488341  
0.255451763 0.350892299 0.574209974 0.611611212  
rs10426920:50655200:G:A ENSG00000204666  
rs4802726:51178687:G:C:ENSG00000161677 0.405404276 0.039514306  
0.498407593 0.072575018 0.9305498 0.813853703  
rs4802726:51178687:G:C ENSG00000161677  
rs3987748:51179712:A:G:ENSG00000161677 0.338515132 0.039514306  
0.450702715 0.072575018 0.910108997 0.813853703  
rs3987748:51179712:A:G ENSG00000161677  
rs60044434:51180058:T:C:ENSG00000161677 0.322853095 0.039514306  
0.470302738 0.072575018 0.899275605 0.813853703  
rs60044434:51180058:T:C ENSG00000161677  
rs4802730:51180530:T:G:ENSG00000161677 0.312801549 0.039514306  
0.443593462 0.072575018 0.899479198 0.813853703  
rs4802730:51180530:T:G ENSG00000161677  
JHU\_19.51181415:ENSG00000161677 0.325001177 0.039514306 0.443593462  
0.072575018 0.899275605 0.813853703 JHU\_19.51181415 ENSG00000161677

rs111940724:51183976:G:A:ENSG00000161677 0.342246666 0.039514306  
0.466752146 0.401539023 0.902894948 0.813853703  
rs111940724:51183976:G:A ENSG00000161677  
rs9304793:58129644:G:A:ENSG00000121417 0.035322296 0.602208356  
0.575705306 0.751091602 0.54593522 0.469127215  
rs9304793:58129644:G:A ENSG00000121417  
rs9749439:58135349:T:G:ENSG00000121417 0.035322296 0.039514306  
0.054815691 0.401539023 0.218559406 0.108665807  
rs9749439:58135349:T:G ENSG00000121417  
rs78390131:58137359:G:A:ENSG00000121417 0.035322296 0.039514306  
0.054815691 0.226823504 0.069942274 0.063994875  
rs78390131:58137359:G:A ENSG00000121417  
rs12104224:58147563:C:T:ENSG00000121417 0.035322296 0.039514306  
0.054815691 0.390584104 0.340307796 0.308405655  
rs12104224:58147563:C:T ENSG00000121417  
rs12104226:58147594:G:A:ENSG00000121417 0.035322296 0.039514306  
0.054815691 0.390584104 0.340307796 0.308405655  
rs12104226:58147594:G:A ENSG00000121417  
rs74960156:58147989:A:C:ENSG00000121417 0.035322296 0.039514306  
0.054815691 0.301206855 0.218559406 0.063994875  
rs74960156:58147989:A:C ENSG00000121417  
rs3746215:58153596:G:T:ENSG00000121417 0.035322296 0.039514306  
0.054815691 0.390584104 0.340307796 0.308405655  
rs3746215:58153596:G:T ENSG00000121417  
rs1044985:58153656:A:G:ENSG00000121417 0.035322296 0.039514306  
0.054815691 0.390584104 0.340307796 0.308405655  
rs1044985:58153656:A:G ENSG00000121417  
rs12276:58154092:G:A:ENSG00000121417 0.035322296 0.039514306  
0.054815691 0.390584104 0.340307796 0.308405655 rs12276:58154092:G:A  
ENSG00000121417  
rs113757723:58993144:GGTTTTGTTTT:G:ENSG00000171574 0.035322296  
0.689753164 0.5196698 0.718511196 0.438540244 0.201281701  
rs113757723:58993144:GGTTTTGTTTT:G ENSG00000171574  
rs77498029:58993254:G:A:ENSG00000171574 0.035322296 0.668532818  
0.495886418 0.671961709 0.484480155 0.108665807  
rs77498029:58993254:G:A ENSG00000171574  
rs59286201:30812145:AG:A:ENSG00000101346 0.273365067 0.039514306  
0.5196698 0.577552537 0.484480155 0.511827661  
rs59286201:30812145:AG:A ENSG00000101346  
rs7274665:30816456:T:C:ENSG00000101346 0.271758927 0.039514306  
0.525522206 0.581928322 0.504458419 0.511827661  
rs7274665:30816456:T:C ENSG00000101346  
rs6058568:30817542:G:A:ENSG00000101346 0.271758927 0.039514306  
0.525522206 0.581928322 0.504458419 0.511827661  
rs6058568:30817542:G:A ENSG00000101346  
rs113200303:30817961:C:G:ENSG00000101346 0.271758927 0.039514306  
0.528262409 0.581928322 0.504458419 0.511827661  
rs113200303:30817961:C:G ENSG00000101346  
rs6058570:30820576:C:T:ENSG00000101346 0.271758927 0.039514306  
0.528262409 0.581928322 0.504458419 0.511827661  
rs6058570:30820576:C:T ENSG00000101346  
rs142649615:30825768:TA:T:ENSG00000101346 0.271758927 0.039514306  
0.525522206 0.580315256 0.504458419 0.510329036  
rs142649615:30825768:TA:T ENSG00000101346

rs6120951:34045191:G:A:ENSG00000126001 0.31683404 0.039514306  
0.470302738 0.740968155 0.595947504 0.762727032  
rs6120951:34045191:G:A ENSG00000126001  
rs12480121:34045513:A:G:ENSG00000126001 0.31683404 0.039514306  
0.470302738 0.740968155 0.595947504 0.762727032  
rs12480121:34045513:A:G ENSG00000126001  
rs58458373:34045611:T:A:ENSG00000126001 0.31683404 0.039514306  
0.470302738 0.740968155 0.595947504 0.762727032  
rs58458373:34045611:T:A ENSG00000126001  
rs3818441:34046501:G:A:ENSG00000126001 0.31683404 0.039514306  
0.470302738 0.740968155 0.595947504 0.762727032  
rs3818441:34046501:G:A ENSG00000126001  
rs11433451:34047055:G:GT:ENSG00000126001 0.31683404 0.039514306  
0.470302738 0.740968155 0.595947504 0.762727032  
rs11433451:34047055:G:GT ENSG00000126001  
rs1570841:ENSG00000126001 0.273365067 0.039514306 0.398350929  
0.743867896 0.532319281 0.742226273 rs1570841 ENSG00000126001  
rs736031:34048625:T:C:ENSG00000126001 0.282721177 0.039514306  
0.400191924 0.746587726 0.54593522 0.740076738 rs736031:34048625:T:C  
ENSG00000126001  
rs736032:34048661:C:T:ENSG00000126001 0.300053761 0.039514306  
0.443593462 0.745908079 0.565674613 0.758857069 rs736032:34048661:C:T  
ENSG00000126001  
rs8116304:34054409:C:T:ENSG00000126001 0.300053761 0.039514306  
0.443593462 0.745908079 0.565674613 0.758857069  
rs8116304:34054409:C:T ENSG00000126001  
rs5841213:34055453:AG:A:ENSG00000126001 0.300053761 0.039514306  
0.443593462 0.745908079 0.565674613 0.758857069  
rs5841213:34055453:AG:A ENSG00000126001  
rs1886696:34055706:T:C:ENSG00000126001 0.301603763 0.039514306  
0.398350929 0.743867896 0.54593522 0.749650459  
rs1886696:34055706:T:C ENSG00000126001  
rs6060430:34056952:T:C:ENSG00000126001 0.301603763 0.039514306  
0.398350929 0.743867896 0.54593522 0.749650459  
rs6060430:34056952:T:C ENSG00000126001  
rs6060431:34059337:T:C:ENSG00000126001 0.280686821 0.039514306  
0.406502841 0.743314243 0.54593522 0.74132011  
rs6060431:34059337:T:C ENSG00000126001  
rs2281849:34060286:T:C:ENSG00000126001 0.280686821 0.039514306  
0.406502841 0.743314243 0.54593522 0.74132011  
rs2281849:34060286:T:C ENSG00000126001  
rs4911503:34063095:C:T:ENSG00000126001 0.297292124 0.039514306  
0.450702715 0.746587726 0.565674613 0.758857069  
rs4911503:34063095:C:T ENSG00000126001  
rs6119612:34065125:A:G:ENSG00000126001 0.297292124 0.039514306  
0.450702715 0.746587726 0.565674613 0.758857069  
rs6119612:34065125:A:G ENSG00000126001  
rs6119613:34065195:A:G:ENSG00000126001 0.305615864 0.039514306  
0.436932543 0.746587726 0.580298595 0.757470737  
rs6119613:34065195:A:G ENSG00000126001  
rs2004554:34066312:T:C:ENSG00000126001 0.297292124 0.039514306  
0.450702715 0.746587726 0.565674613 0.758857069  
rs2004554:34066312:T:C ENSG00000126001



rs750487:34066645:T:C:ENSG00000126001 0.297292124 0.039514306  
0.450702715 0.746587726 0.565674613 0.758857069 rs750487:34066645:T:C  
ENSG00000126001

rs58355182:34075687:T:G:ENSG00000126001 0.271758927 0.039514306  
0.269469279 0.744964321 0.484480155 0.705938854  
rs58355182:34075687:T:G ENSG00000126001

rs55969606:34075688:T:C:ENSG00000126001 0.25732594 0.039514306  
0.238368074 0.729821915 0.450253392 0.684588293  
rs55969606:34075688:T:C ENSG00000126001

rs6119614:34076780:A:G:ENSG00000126001 0.271758927 0.039514306  
0.269469279 0.744540267 0.480692872 0.704314191  
rs6119614:34076780:A:G ENSG00000126001

rs6120959:34077848:G:A:ENSG00000126001 0.271758927 0.039514306  
0.310525978 0.741550909 0.490050927 0.723412688  
rs6120959:34077848:G:A ENSG00000126001

rs6058254:34079494:T:C:ENSG00000126001 0.271758927 0.039514306  
0.238368074 0.744540267 0.477032507 0.69542589  
rs6058254:34079494:T:C ENSG00000126001

rs2236165:34096725:A:G:ENSG00000126001 0.271758927 0.039514306  
0.255451763 0.743311155 0.472198515 0.699560088  
rs2236165:34096725:A:G ENSG00000126001

exm-rs2236164:ENSG00000126001 0.271758927 0.039514306 0.310525978  
0.742519542 0.480692872 0.710464737 exm-rs2236164 ENSG00000126001

rs2236160:34101821:A:G:ENSG00000126001 0.253880551 0.039514306  
0.238368074 0.736267142 0.438540244 0.705938854  
rs2236160:34101821:A:G ENSG00000126001

rs6027812:35191080:T:G:ENSG00000101084 0.035322296 0.529389495  
0.722493939 0.767307763 0.794115648 0.748055982  
rs6027812:35191080:T:G ENSG00000101084

rs114847319:35191867:C:G:ENSG00000101084 0.035322296 0.529389495  
0.721465596 0.767307763 0.788891622 0.74132011  
rs114847319:35191867:C:G ENSG00000101084

rs138422983:35192738:A:G:ENSG00000101084 0.035322296 0.517717788  
0.707238467 0.761207831 0.777200875 0.735371396  
rs138422983:35192738:A:G ENSG00000101084

rs6028155:35197712:A:G:ENSG00000101084 0.035322296 0.467084083  
0.701097355 0.751091602 0.824032297 0.631825967  
rs6028155:35197712:A:G ENSG00000101084

rs76169709:35201493:T:C:ENSG00000101084 0.035322296 0.467084083  
0.701097355 0.751091602 0.823501477 0.631825967  
rs76169709:35201493:T:C ENSG00000101084

rs35893501:35215104:CCCA:C:ENSG00000101084 0.035322296 0.257351931  
0.78047011 0.751091602 0.774765425 0.742226273  
rs35893501:35215104:CCCA:C ENSG00000101084

rs6028347:35238924:A:G:ENSG00000101084 0.035322296 0.469499546  
0.679533134 0.734208802 0.801413132 0.684588293  
rs6028347:35238924:A:G ENSG00000101084

rs76402820:35256388:C:A:ENSG00000101084 0.035322296 0.538459161  
0.495886418 0.772750049 0.57001038 0.640308963  
rs76402820:35256388:C:A ENSG00000101084

rs6101519:35256718:C:A:ENSG00000101084 0.035322296 0.53025993  
0.495886418 0.772750049 0.54593522 0.628577259  
rs6101519:35256718:C:A ENSG00000101084

rs189677451:35257127:A:T:ENSG00000101084 0.035322296 0.5418066  
0.370396184 0.751091602 0.805872786 0.441545027  
rs189677451:35257127:A:T ENSG00000101084  
rs112402055:35257652:C:G:ENSG00000101084 0.035322296 0.533691809  
0.492105461 0.772750049 0.54593522 0.629719559  
rs112402055:35257652:C:G ENSG00000101084  
rs113088286:35258150:A:C:ENSG00000101084 0.035322296 0.552128457  
0.568513848 0.772750049 0.594105975 0.556049114  
rs113088286:35258150:A:C ENSG00000101084  
rs6093176:35258741:A:G:ENSG00000101084 0.035322296 0.533691809  
0.492105461 0.770188417 0.54593522 0.629184088  
rs6093176:35258741:A:G ENSG00000101084  
rs6101529:35258830:G:A:ENSG00000101084 0.035322296 0.535783092  
0.492105461 0.772750049 0.54593522 0.629184088  
rs6101529:35258830:G:A ENSG00000101084  
rs59586574:35259103:T:C:ENSG00000101084 0.035322296 0.535783092  
0.492105461 0.772750049 0.54593522 0.629184088  
rs59586574:35259103:T:C ENSG00000101084  
rs113148107:35259446:A:G:ENSG00000101084 0.035322296 0.535783092  
0.492105461 0.772111876 0.54593522 0.631825967  
rs113148107:35259446:A:G ENSG00000101084  
rs113759058:35259576:A:AG:ENSG00000101084 0.035322296 0.535783092  
0.492105461 0.772111876 0.54593522 0.631825967  
rs113759058:35259576:A:AG ENSG00000101084  
rs6101542:35259654:T:C:ENSG00000101084 0.035322296 0.529389495  
0.492105461 0.763588687 0.526407644 0.631825967  
rs6101542:35259654:T:C ENSG00000101084  
rs113167967:35259926:T:C:ENSG00000101084 0.035322296 0.537194194  
0.492105461 0.772750049 0.54593522 0.631825967  
rs113167967:35259926:T:C ENSG00000101084  
rs75466212:35260221:A:C:ENSG00000101084 0.035322296 0.570701598  
0.568513848 0.774949478 0.66458282 0.689693952  
rs75466212:35260221:A:C ENSG00000101084  
rs6101556:35260837:T:C:ENSG00000101084 0.035322296 0.566392291  
0.568513848 0.772986267 0.647818531 0.663342074  
rs6101556:35260837:T:C ENSG00000101084  
rs113803332:35261681:A:G:ENSG00000101084 0.035322296 0.560196984  
0.568513848 0.77086265 0.636822477 0.659336192  
rs113803332:35261681:A:G ENSG00000101084  
rs79781699:35261771:A:G:ENSG00000101084 0.035322296 0.560196984  
0.568513848 0.771395682 0.636822477 0.657031972  
rs79781699:35261771:A:G ENSG00000101084  
rs59018650:35262288:G:A:ENSG00000101084 0.035322296 0.563997567  
0.568513848 0.772750049 0.641673925 0.655547185  
rs59018650:35262288:G:A ENSG00000101084  
rs62202464:37379082:G:A:ENSG00000101442 0.542960896 0.039514306 0.515964  
0.441817908 0.112902598 0.174366738 rs62202464:37379082:G:A  
ENSG00000101442  
rs11480019:37379778:AT:A:ENSG00000101442 0.543396977 0.039514306  
0.515964 0.442167795 0.112902598 0.174366738  
rs11480019:37379778:AT:A ENSG00000101442  
rs113793312:37381562:C:CT:ENSG00000101442 0.515193516 0.039514306  
0.677261746 0.539448558 0.218559406 0.063994875  
rs113793312:37381562:C:CT ENSG00000101442

rs143267835:37383250:T:G:ENSG00000101442 0.556419241 0.039514306  
0.562861286 0.469436994 0.112902598 0.174366738  
rs143267835:37383250:T:G ENSG00000101442  
rs62202471:37385921:C:G:ENSG00000101442 0.556889001 0.039514306  
0.562861286 0.472415297 0.112902598 0.174366738  
rs62202471:37385921:C:G ENSG00000101442  
rs7267156:37387056:G:A:ENSG00000101442 0.534802497 0.039514306  
0.360243455 0.165229468 0.148497947 0.24867752  
rs7267156:37387056:G:A ENSG00000101442  
rs6128906:37387582:A:T:ENSG00000101442 0.556889001 0.039514306  
0.562861286 0.472415297 0.112902598 0.174366738  
rs6128906:37387582:A:T ENSG00000101442  
rs6128907:37387862:T:C:ENSG00000101442 0.556889001 0.039514306  
0.562861286 0.472415297 0.112902598 0.174366738  
rs6128907:37387862:T:C ENSG00000101442  
rs62202472:37390786:G:A:ENSG00000101442 0.534802497 0.039514306  
0.360243455 0.165229468 0.148497947 0.24867752  
rs62202472:37390786:G:A ENSG00000101442  
rs10485651:37394032:C:T:ENSG00000101442 0.534802497 0.039514306  
0.360243455 0.165229468 0.148497947 0.24867752  
rs10485651:37394032:C:T ENSG00000101442  
20:37399488-C-T:ENSG00000101442 0.557545872 0.039514306 0.562861286  
0.478009532 0.112902598 0.174366738 20:37399488-C-T ENSG00000101442  
rs8125582:ENSG00000101442 0.525727277 0.039514306 0.360243455  
0.165229468 0.198669295 0.597837774 rs8125582 ENSG00000101442  
rs6128959:37402395:C:T:ENSG00000101442 0.557545872 0.039514306  
0.562861286 0.478009532 0.112902598 0.174366738  
rs6128959:37402395:C:T ENSG00000101442  
rs1535431:37404419:T:G:ENSG00000101442 0.557545872 0.039514306  
0.562861286 0.478009532 0.112902598 0.174366738  
rs1535431:37404419:T:G ENSG00000101442  
rs73104045:ENSG00000101442 0.533786189 0.039514306 0.360243455  
0.165229468 0.148497947 0.269135872 rs73104045 ENSG00000101442  
rs116490114:37408170:G:A:ENSG00000101442 0.557545872 0.039514306  
0.560108139 0.478009532 0.112902598 0.174366738  
rs116490114:37408170:G:A ENSG00000101442  
rs62202485:37408568:G:A:ENSG00000101442 0.557545872 0.039514306  
0.560108139 0.478009532 0.112902598 0.174366738  
rs62202485:37408568:G:A ENSG00000101442  
rs113875872:37413026:AT:A:ENSG00000101442 0.557545872 0.039514306  
0.560108139 0.478009532 0.112902598 0.174366738  
rs113875872:37413026:AT:A ENSG00000101442  
rs6019535:47541517:G:A:ENSG00000124207 0.035322296 0.039514306  
0.054815691 0.072575018 0.069942274 0.063994875  
rs6019535:47541517:G:A ENSG00000124207  
rs34984028:47549047:C:T:ENSG00000124207 0.035322296 0.066642396  
0.090437058 0.072575018 0.112902598 0.063994875  
rs34984028:47549047:C:T ENSG00000124207  
rs5841741:47549979:TA:T:ENSG00000124207 0.10009087 0.039514306  
0.054815691 0.072575018 0.069942274 0.063994875  
rs5841741:47549979:TA:T ENSG00000124207  
rs6095367:47550488:C:T:ENSG00000124207 0.035322296 0.066642396  
0.090437058 0.072575018 0.112902598 0.063994875  
rs6095367:47550488:C:T ENSG00000124207

rs186527529:47552596:G:A:ENSG00000124207 0.035322296 0.039514306  
0.054815691 0.072575018 0.069942274 0.063994875  
rs186527529:47552596:G:A ENSG00000124207  
rs35166218:47552761:G:A:ENSG00000124207 0.035322296 0.066642396  
0.090437058 0.072575018 0.112902598 0.063994875  
rs35166218:47552761:G:A ENSG00000124207  
rs6019545:47557014:G:A:ENSG00000124207 0.035322296 0.039514306  
0.054815691 0.072575018 0.069942274 0.063994875  
rs6019545:47557014:G:A ENSG00000124207  
rs1983639:47572282:G:A:ENSG00000124207 0.035322296 0.089622533  
0.054815691 0.072575018 0.198669295 0.063994875  
rs1983639:47572282:G:A ENSG00000124207  
rs2295027:47582884:G:A:ENSG00000124207 0.035322296 0.039514306  
0.054815691 0.072575018 0.069942274 0.063994875  
rs2295027:47582884:G:A ENSG00000124207  
rs6019557:47583372:T:G:ENSG00000124207 0.035322296 0.089622533  
0.054815691 0.072575018 0.198669295 0.063994875  
rs6019557:47583372:T:G ENSG00000124207  
rs6019558:47583480:C:A:ENSG00000124207 0.035322296 0.039514306  
0.054815691 0.072575018 0.069942274 0.063994875  
rs6019558:47583480:C:A ENSG00000124207  
rs6019567:47595961:G:A:ENSG00000124207 0.035322296 0.089622533  
0.054815691 0.072575018 0.198669295 0.063994875  
rs6019567:47595961:G:A ENSG00000124207  
rs6090932:47598298:A:C:ENSG00000124207 0.035322296 0.039514306  
0.054815691 0.072575018 0.069942274 0.063994875  
rs6090932:47598298:A:C ENSG00000124207  
rs1569749:47601509:A:G:ENSG00000124207 0.035322296 0.089622533  
0.054815691 0.072575018 0.198669295 0.063994875  
rs1569749:47601509:A:G ENSG00000124207  
rs1997854:47602339:A:G:ENSG00000124207 0.035322296 0.039514306  
0.054815691 0.072575018 0.069942274 0.063994875  
rs1997854:47602339:A:G ENSG00000124207  
rs1048590:47610297:G:T:ENSG00000124207 0.035322296 0.089622533  
0.054815691 0.072575018 0.198669295 0.063994875  
rs1048590:47610297:G:T ENSG00000124207  
rs2295033:47610896:C:T:ENSG00000124207 0.035322296 0.039514306  
0.054815691 0.072575018 0.069942274 0.063994875  
rs2295033:47610896:C:T ENSG00000124207  
rs34537217:47624486:ATTT:A:ENSG00000124207 0.035322296 0.089622533  
0.054815691 0.072575018 0.198669295 0.063994875  
rs34537217:47624486:ATTT:A ENSG00000124207  
rs2869692:47638256:G:A:ENSG00000124207 0.035322296 0.039514306  
0.054815691 0.072575018 0.069942274 0.063994875  
rs2869692:47638256:G:A ENSG00000124207  
rs7270848:47639737:A:G:ENSG00000124207 0.035322296 0.089622533  
0.054815691 0.072575018 0.198669295 0.063994875  
rs7270848:47639737:A:G ENSG00000124207  
rs6019591:47640029:T:A:ENSG00000124207 0.035322296 0.039514306  
0.054815691 0.072575018 0.069942274 0.063994875  
rs6019591:47640029:T:A ENSG00000124207  
rs6019593:47640168:T:C:ENSG00000124207 0.035322296 0.089622533  
0.054815691 0.072575018 0.198669295 0.063994875  
rs6019593:47640168:T:C ENSG00000124207

rs66970580:47641339:T:C:ENSG00000124207 0.035322296 0.039514306  
0.054815691 0.072575018 0.069942274 0.063994875  
rs66970580:47641339:T:C ENSG00000124207  
rs13041022:47642476:G:A:ENSG00000124207 0.035322296 0.089622533  
0.054815691 0.072575018 0.198669295 0.063994875  
rs13041022:47642476:G:A ENSG00000124207  
rs7262379:47642579:A:G:ENSG00000124207 0.035322296 0.039514306  
0.054815691 0.072575018 0.069942274 0.063994875  
rs7262379:47642579:A:G ENSG00000124207  
rs6019594:47643554:C:G:ENSG00000124207 0.035322296 0.089622533  
0.054815691 0.072575018 0.198669295 0.063994875  
rs6019594:47643554:C:G ENSG00000124207  
rs6019595:47644032:A:G:ENSG00000124207 0.035322296 0.039514306  
0.054815691 0.072575018 0.069942274 0.063994875  
rs6019595:47644032:A:G ENSG00000124207  
rs68087998:47644292:TGTA:T:ENSG00000124207 0.035322296 0.089622533  
0.054815691 0.072575018 0.198669295 0.063994875  
rs68087998:47644292:TGTA:T ENSG00000124207  
rs73623293:47645002:G:GT:ENSG00000124207 0.035322296 0.039514306  
0.054815691 0.072575018 0.069942274 0.063994875  
rs73623293:47645002:G:GT ENSG00000124207  
rs6095400:47645989:A:C:ENSG00000124207 0.035322296 0.089622533  
0.054815691 0.072575018 0.198669295 0.063994875  
rs6095400:47645989:A:C ENSG00000124207  
rs71184247:47646132:AT:A:ENSG00000124207 0.035322296 0.039514306  
0.054815691 0.072575018 0.069942274 0.063994875  
rs71184247:47646132:AT:A ENSG00000124207  
rs139675382:47646437:G:GA:ENSG00000124207 0.035322296 0.159643516  
0.121437838 0.123210094 0.237095457 0.108665807  
rs139675382:47646437:G:GA ENSG00000124207  
rs6095401:47646621:G:A:ENSG00000124207 0.035322296 0.039514306  
0.054815691 0.072575018 0.069942274 0.063994875  
rs6095401:47646621:G:A ENSG00000124207  
rs6012586:47647417:T:C:ENSG00000124207 0.035322296 0.089622533  
0.054815691 0.072575018 0.198669295 0.063994875  
rs6012586:47647417:T:C ENSG00000124207  
rs6019601:47647662:T:C:ENSG00000124207 0.035322296 0.039514306  
0.054815691 0.072575018 0.069942274 0.063994875  
rs6019601:47647662:T:C ENSG00000124207  
rs13042947:47647876:T:C:ENSG00000124207 0.035322296 0.12731097  
0.090437058 0.072575018 0.237095457 0.063994875  
rs13042947:47647876:T:C ENSG00000124207  
rs1022688:47648856:G:A:ENSG00000124207 0.035322296 0.039514306  
0.054815691 0.072575018 0.069942274 0.063994875  
rs1022688:47648856:G:A ENSG00000124207  
rs6019602:47651492:G:A:ENSG00000124207 0.035322296 0.089622533  
0.054815691 0.072575018 0.198669295 0.063994875  
rs6019602:47651492:G:A ENSG00000124207  
rs707533:47652254:A:G:ENSG00000124207 0.035322296 0.039514306  
0.054815691 0.072575018 0.069942274 0.063994875 rs707533:47652254:A:G  
ENSG00000124207  
rs707534:ENSG00000124207 0.035322296 0.039514306 0.054815691  
0.072575018 0.112902598 0.063994875 rs707534 ENSG00000124207

rs16994347:47653361:T:G:ENSG00000124207 0.035322296 0.089622533  
0.054815691 0.072575018 0.198669295 0.063994875  
rs16994347:47653361:T:G ENSG00000124207  
rs6019603:47653406:T:C:ENSG00000124207 0.035322296 0.039514306  
0.054815691 0.072575018 0.069942274 0.063994875  
rs6019603:47653406:T:C ENSG00000124207  
rs6019604:47653498:G:A:ENSG00000124207 0.035322296 0.089622533  
0.054815691 0.072575018 0.198669295 0.063994875  
rs6019604:47653498:G:A ENSG00000124207  
rs927160:47654564:C:G:ENSG00000124207 0.035322296 0.039514306  
0.054815691 0.072575018 0.069942274 0.063994875 rs927160:47654564:C:G  
ENSG00000124207  
rs6019609:47655768:C:G:ENSG00000124207 0.035322296 0.089622533  
0.054815691 0.072575018 0.198669295 0.063994875  
rs6019609:47655768:C:G ENSG00000124207  
rs35167846:47655844:TG:T:ENSG00000124207 0.035322296 0.039514306  
0.054815691 0.072575018 0.069942274 0.063994875  
rs35167846:47655844:TG:T ENSG00000124207  
rs11905116:47658064:A:G:ENSG00000124207 0.035322296 0.089622533  
0.054815691 0.072575018 0.198669295 0.063994875  
rs11905116:47658064:A:G ENSG00000124207  
rs6095407:47661470:G:C:ENSG00000124207 0.035322296 0.039514306  
0.054815691 0.072575018 0.069942274 0.063994875  
rs6095407:47661470:G:C ENSG00000124207  
rs3817652:47663368:A:G:ENSG00000124207 0.035322296 0.089622533  
0.054815691 0.072575018 0.198669295 0.063994875  
rs3817652:47663368:A:G ENSG00000124207  
rs6019613:47664667:C:T:ENSG00000124207 0.035322296 0.039514306  
0.054815691 0.072575018 0.069942274 0.063994875  
rs6019613:47664667:C:T ENSG00000124207  
rs6090939:47665825:A:G:ENSG00000124207 0.035322296 0.089622533  
0.054815691 0.072575018 0.198669295 0.063994875  
rs6090939:47665825:A:G ENSG00000124207  
rs6090940:47666027:G:T:ENSG00000124207 0.035322296 0.039514306  
0.054815691 0.072575018 0.069942274 0.063994875  
rs6090940:47666027:G:T ENSG00000124207  
rs6012590:47667237:C:T:ENSG00000124207 0.035322296 0.089622533  
0.054815691 0.072575018 0.198669295 0.063994875  
rs6012590:47667237:C:T ENSG00000124207  
rs6012591:47667342:T:C:ENSG00000124207 0.035322296 0.039514306  
0.054815691 0.072575018 0.069942274 0.063994875  
rs6012591:47667342:T:C ENSG00000124207  
rs35018308:47667922:A:AAG:ENSG00000124207 0.035322296 0.089622533  
0.054815691 0.072575018 0.198669295 0.063994875  
rs35018308:47667922:A:AAG ENSG00000124207  
rs7509369:47668037:G:A:ENSG00000124207 0.035322296 0.039514306  
0.054815691 0.072575018 0.069942274 0.063994875  
rs7509369:47668037:G:A ENSG00000124207  
rs2869694:47668383:C:T:ENSG00000124207 0.035322296 0.089622533  
0.054815691 0.072575018 0.198669295 0.063994875  
rs2869694:47668383:C:T ENSG00000124207  
rs73611328:47669980:T:C:ENSG00000124207 0.035322296 0.039514306  
0.054815691 0.072575018 0.069942274 0.063994875  
rs73611328:47669980:T:C ENSG00000124207



rs6019618:47671538:T:C:ENSG00000124207 0.035322296 0.039514306  
0.054815691 0.072575018 0.069942274 0.063994875  
rs6019618:47671538:T:C ENSG00000124207  
rs3795082:47673002:G:C:ENSG00000124207 0.035322296 0.089622533  
0.054815691 0.072575018 0.198669295 0.063994875  
rs3795082:47673002:G:C ENSG00000124207  
rs6090941:47676951:G:A:ENSG00000124207 0.035322296 0.039514306  
0.054815691 0.072575018 0.069942274 0.063994875  
rs6090941:47676951:G:A ENSG00000124207  
rs6095416:47677007:C:T:ENSG00000124207 0.035322296 0.089622533  
0.054815691 0.072575018 0.198669295 0.063994875  
rs6095416:47677007:C:T ENSG00000124207  
rs6012592:47677162:C:A:ENSG00000124207 0.035322296 0.039514306  
0.054815691 0.072575018 0.069942274 0.063994875  
rs6012592:47677162:C:A ENSG00000124207  
rs6019619:47677834:T:C:ENSG00000124207 0.035322296 0.039514306  
0.054815691 0.072575018 0.069942274 0.063994875  
rs6019619:47677834:T:C ENSG00000124207  
rs6012593:47677835:G:A:ENSG00000124207 0.035322296 0.089622533  
0.054815691 0.072575018 0.198669295 0.063994875  
rs6012593:47677835:G:A ENSG00000124207  
rs200355693:47678023:ATTAT:A:ENSG00000124207 0.035322296 0.039514306  
0.054815691 0.072575018 0.069942274 0.063994875  
rs200355693:47678023:ATTAT:A ENSG00000124207  
rs6095417:47678201:G:A:ENSG00000124207 0.035322296 0.089622533  
0.054815691 0.072575018 0.198669295 0.063994875  
rs6095417:47678201:G:A ENSG00000124207  
rs6019620:47679300:T:A:ENSG00000124207 0.035322296 0.039514306  
0.054815691 0.072575018 0.069942274 0.063994875  
rs6019620:47679300:T:A ENSG00000124207  
rs10714453:47679655:AT:A:ENSG00000124207 0.035322296 0.089622533  
0.054815691 0.072575018 0.198669295 0.063994875  
rs10714453:47679655:AT:A ENSG00000124207  
rs6019621:47679963:C:T:ENSG00000124207 0.035322296 0.039514306  
0.054815691 0.072575018 0.069942274 0.063994875  
rs6019621:47679963:C:T ENSG00000124207  
rs2075675:47685493:T:C:ENSG00000124207 0.035322296 0.089622533  
0.054815691 0.072575018 0.198669295 0.063994875  
rs2075675:47685493:T:C ENSG00000124207  
rs6019624:47685815:G:A:ENSG00000124207 0.035322296 0.039514306  
0.054815691 0.072575018 0.069942274 0.063994875  
rs6019624:47685815:G:A ENSG00000124207  
rs6512567:47688620:T:G:ENSG00000124207 0.035322296 0.089622533  
0.054815691 0.072575018 0.198669295 0.063994875  
rs6512567:47688620:T:G ENSG00000124207  
rs2075676:47691211:C:A:ENSG00000124207 0.035322296 0.039514306  
0.054815691 0.072575018 0.069942274 0.063994875  
rs2075676:47691211:C:A ENSG00000124207  
rs2426117:47693160:G:A:ENSG00000124207 0.035322296 0.089622533  
0.054815691 0.072575018 0.198669295 0.063994875  
rs2426117:47693160:G:A ENSG00000124207  
rs199723911:47695997:T:TC:ENSG00000124207 0.035322296 0.039514306  
0.054815691 0.072575018 0.069942274 0.063994875  
rs199723911:47695997:T:TC ENSG00000124207

20:47695999:A:T:ENSG00000124207 0.035322296 0.039514306 0.054815691  
0.072575018 0.148497947 0.063994875 20:47695999:A:T ENSG00000124207  
rs34799440:47696000:G:GA:ENSG00000124207 0.035322296 0.039514306  
0.054815691 0.072575018 0.069942274 0.063994875  
rs34799440:47696000:G:GA ENSG00000124207  
rs2426120:47697253:T:A:ENSG00000124207 0.035322296 0.089622533  
0.054815691 0.072575018 0.198669295 0.063994875  
rs2426120:47697253:T:A ENSG00000124207  
rs112964185:47697524:TTC:T:ENSG00000124207 0.035322296 0.039514306  
0.054815691 0.072575018 0.069942274 0.063994875  
rs112964185:47697524:TTC:T ENSG00000124207  
rs2426121:47697732:A:C:ENSG00000124207 0.035322296 0.066642396  
0.054815691 0.072575018 0.198669295 0.063994875  
rs2426121:47697732:A:C ENSG00000124207  
rs2426122:47697939:A:G:ENSG00000124207 0.035322296 0.039514306  
0.054815691 0.072575018 0.069942274 0.063994875  
rs2426122:47697939:A:G ENSG00000124207  
rs2426125:47700982:A:G:ENSG00000124207 0.035322296 0.089622533  
0.054815691 0.072575018 0.198669295 0.063994875  
rs2426125:47700982:A:G ENSG00000124207  
rs1885163:47701765:T:C:ENSG00000124207 0.035322296 0.039514306  
0.054815691 0.072575018 0.069942274 0.063994875  
rs1885163:47701765:T:C ENSG00000124207  
rs1538482:47705496:T:C:ENSG00000124207 0.035322296 0.089622533  
0.054815691 0.072575018 0.198669295 0.063994875  
rs1538482:47705496:T:C ENSG00000124207  
rs3092348:47705763:GTT:G:ENSG00000124207 0.035322296 0.039514306  
0.054815691 0.072575018 0.069942274 0.063994875  
rs3092348:47705763:GTT:G ENSG00000124207  
rs2295714:47739814:C:T:ENSG00000124207 0.301603763 0.039514306  
0.054815691 0.072575018 0.069942274 0.063994875  
rs2295714:47739814:C:T ENSG00000124207  
rs71337493:47746627:A:AATAG:ENSG00000124207 0.300053761 0.039514306  
0.054815691 0.072575018 0.069942274 0.063994875  
rs71337493:47746627:A:AATAG ENSG00000124207  
rs6066979:47760856:A:G:ENSG00000124207 0.407773261 0.039514306  
0.054815691 0.072575018 0.069942274 0.063994875  
rs6066979:47760856:A:G ENSG00000124207  
rs348258:47768988:C:T:ENSG00000124207 0.035322296 0.039514306  
0.054815691 0.072575018 0.069942274 0.063994875 rs348258:47768988:C:T  
ENSG00000124207  
rs56131635:47774343:G:A:ENSG00000124207 0.407773261 0.039514306  
0.054815691 0.072575018 0.069942274 0.063994875  
rs56131635:47774343:G:A ENSG00000124207  
rs3092427:47774781:G:T:ENSG00000124207 0.035322296 0.039514306  
0.054815691 0.072575018 0.069942274 0.063994875  
rs3092427:47774781:G:T ENSG00000124207  
rs2426139:47780105:G:A:ENSG00000124207 0.035322296 0.039514306  
0.054815691 0.072575018 0.069942274 0.063994875  
rs2426139:47780105:G:A ENSG00000124207  
rs237700:47909822:A:G:ENSG00000222365 0.415662768 0.039514306  
0.539346559 0.617124137 0.804199657 0.832178722 rs237700:47909822:A:G  
ENSG00000222365

rs73119461:48775989:T:A:ENSG00000237595 0.447672715 0.039514306  
0.828327833 0.530641947 0.069942274 0.78856276  
rs73119461:48775989:T:A ENSG00000237595  
rs6020301:48776465:G:C:ENSG00000237595 0.600453444 0.039514306  
0.828327833 0.558498626 0.069942274 0.813853703  
rs6020301:48776465:G:C ENSG00000237595  
rs13044470:48776806:A:G:ENSG00000237595 0.594931318 0.039514306  
0.828327833 0.572233838 0.069942274 0.813853703  
rs13044470:48776806:A:G ENSG00000237595  
rs13044872:48776807:G:T:ENSG00000237595 0.594931318 0.039514306  
0.828327833 0.572233838 0.069942274 0.813853703  
rs13044872:48776807:G:T ENSG00000237595  
rs11475322:48776989:AG:A:ENSG00000237595 0.611777942 0.039514306  
0.828327833 0.574425668 0.069942274 0.813853703  
rs11475322:48776989:AG:A ENSG00000237595  
rs6020303:48777041:G:C:ENSG00000237595 0.61044023 0.039514306  
0.828327833 0.576920785 0.069942274 0.813853703  
rs6020303:48777041:G:C ENSG00000237595  
rs2149895:48777401:G:A:ENSG00000237595 0.604255099 0.039514306  
0.828327833 0.590665154 0.069942274 0.807989632  
rs2149895:48777401:G:A ENSG00000237595  
rs2149896:48777495:T:C:ENSG00000237595 0.601727875 0.039514306  
0.828327833 0.593810582 0.069942274 0.806410789  
rs2149896:48777495:T:C ENSG00000237595  
rs1974103:48780079:G:A:ENSG00000237595 0.603511499 0.039514306  
0.828327833 0.628695369 0.069942274 0.782163764  
rs1974103:48780079:G:A ENSG00000237595  
rs1974105:48780131:A:G:ENSG00000237595 0.608696126 0.039514306  
0.828327833 0.626314657 0.069942274 0.786798608  
rs1974105:48780131:A:G ENSG00000237595  
exml557361:ENSG00000092758 0.461917041 0.039514306 0.42239248  
0.424824518 0.069942274 0.451526982 exml557361 ENSG00000092758  
rs243597:19158039:C:G:ENSG00000154642 0.035322296 0.039514306  
0.360243455 0.072575018 0.716444316 0.282646046 rs243597:19158039:C:G  
ENSG00000154642  
rs243603:19160300:T:C:ENSG00000154642 0.035322296 0.066642396  
0.390230616 0.072575018 0.690981753 0.269135872 rs243603:19160300:T:C  
ENSG00000154642  
rs243605:19161120:G:C:ENSG00000154642 0.035322296 0.039514306  
0.238368074 0.072575018 0.526407644 0.174366738 rs243605:19161120:G:C  
ENSG00000154642  
rs243607:19161515:A:G:ENSG00000154642 0.035322296 0.066642396  
0.390230616 0.072575018 0.690981753 0.269135872 rs243607:19161515:A:G  
ENSG00000154642  
rs12997656:55394166:T:G:ENSG00000162994 0.035322296 0.110495165  
0.090437058 0.751091602 0.690981753 0.813853703  
rs12997656:55394166:T:G ENSG00000162994  
rs10167669:55397523:C:T:ENSG00000162994 0.035322296 0.329515493 0.14398786  
0.561168554 0.838427208 0.813853703 rs10167669:55397523:C:T  
ENSG00000162994  
rs61119180:55399837:TA:T:ENSG00000162994 0.035322296 0.651399716  
0.360243455 0.226823504 0.714300296 0.813853703  
rs61119180:55399837:TA:T ENSG00000162994

rs11692206:ENSG00000162994 0.035322296 0.654488658 0.485354668  
0.385352708 0.900733954 0.833818368 rs11692206 ENSG00000162994  
rs12618111:55414364:G:A:ENSG00000162994 0.035322296 0.066642396  
0.090437058 0.751091602 0.690981753 0.813853703  
rs12618111:55414364:G:A ENSG00000162994  
rs12615414:55419043:A:C:ENSG00000162994 0.035322296 0.53025993  
0.324917292 0.569579255 0.770256297 0.813853703  
rs12615414:55419043:A:C ENSG00000162994  
rs62165172:55736237:A:G:ENSG00000138035 0.48524743 0.039514306 0.83357244  
0.36680942 0.782536654 0.813853703 rs62165172:55736237:A:G  
ENSG00000138035  
rs62165173:55741666:T:C:ENSG00000138035 0.488334683 0.039514306  
0.844049413 0.36680942 0.789584113 0.813853703  
rs62165173:55741666:T:C ENSG00000138035  
rs62165175:55745810:T:A:ENSG00000138035 0.515908395 0.039514306  
0.828327833 0.463396258 0.9305498 0.804202828  
rs62165175:55745810:T:A ENSG00000138035  
rs6739513:55749902:G:A:ENSG00000138035 0.46913627 0.039514306  
0.828327833 0.447551187 0.750632228 0.813853703  
rs6739513:55749902:G:A ENSG00000138035  
2:55762957-C-T:ENSG00000138035 0.466235935 0.039514306 0.828327833  
0.450346002 0.74808171 0.813853703 2:55762957-C-T ENSG00000138035  
rs4672054:55773093:C:A:ENSG00000138035 0.467901626 0.039514306  
0.828327833 0.442167795 0.758499809 0.813853703  
rs4672054:55773093:C:A ENSG00000138035  
rs1058582:55775069:C:T:ENSG00000138035 0.467901626 0.039514306  
0.828327833 0.442167795 0.758499809 0.813853703  
rs1058582:55775069:C:T ENSG00000138035  
rs62165182:55786311:C:T:ENSG00000138035 0.467901626 0.039514306  
0.828327833 0.450346002 0.750632228 0.813853703  
rs62165182:55786311:C:T ENSG00000138035  
rs62165184:55788253:G:C:ENSG00000138035 0.467901626 0.039514306  
0.828327833 0.450346002 0.74808171 0.813853703  
rs62165184:55788253:G:C ENSG00000138035  
rs12991267:55789414:T:C:ENSG00000138035 0.482848054 0.039514306  
0.238368074 0.747187568 0.498016841 0.174366738  
rs12991267:55789414:T:C ENSG00000138035  
rs4672055:55797231:A:G:ENSG00000138035 0.466235935 0.039514306  
0.828327833 0.450346002 0.74808171 0.813853703  
rs4672055:55797231:A:G ENSG00000138035  
2:55797507-T-C:ENSG00000138035 0.466235935 0.039514306 0.828327833  
0.450346002 0.74808171 0.813853703 2:55797507-T-C ENSG00000138035  
rs11358675:55798445:CA:C:ENSG00000138035 0.461917041 0.039514306  
0.828327833 0.450346002 0.801413132 0.813853703  
rs11358675:55798445:CA:C ENSG00000138035  
rs4290693:55799991:C:G:ENSG00000138035 0.466235935 0.039514306  
0.828327833 0.450346002 0.74808171 0.813853703  
rs4290693:55799991:C:G ENSG00000138035  
rs62165197:55801812:C:T:ENSG00000138035 0.466235935 0.039514306  
0.828327833 0.450346002 0.74808171 0.813853703  
rs62165197:55801812:C:T ENSG00000138035  
2:55805172-A-C:ENSG00000138035 0.466235935 0.039514306 0.828327833  
0.450346002 0.74808171 0.813853703 2:55805172-A-C ENSG00000138035

2:55806503-A-G:ENSG00000138035 0.466235935 0.039514306 0.828327833  
0.450346002 0.74808171 0.813853703 2:55806503-A-G ENSG00000138035  
2:55809054-A-G:ENSG00000138035 0.48524743 0.039514306 0.740140062  
0.617124137 0.9305498 0.640308963 2:55809054-A-G ENSG00000138035  
2:55812073-T-G:ENSG00000138035 0.466235935 0.039514306 0.828327833  
0.450346002 0.74808171 0.813853703 2:55812073-T-G ENSG00000138035  
rs2054728:55818419:C:T:ENSG00000138035 0.513785622 0.039514306  
0.645217882 0.617124137 0.9305498 0.758762279  
rs2054728:55818419:C:T ENSG00000138035  
rs62165200:55824496:C:T:ENSG00000138035 0.513785622 0.039514306  
0.645217882 0.617124137 0.9305498 0.758762279  
rs62165200:55824496:C:T ENSG00000138035  
rs935177:55826761:C:G:ENSG00000138035 0.513785622 0.039514306  
0.645217882 0.617124137 0.9305498 0.758762279 rs935177:55826761:C:G  
ENSG00000138035  
rs2586968:55828718:G:T:ENSG00000138035 0.513785622 0.039514306  
0.645217882 0.617124137 0.9305498 0.758762279  
rs2586968:55828718:G:T ENSG00000138035  
2:55836165-A-C:ENSG00000138035 0.466235935 0.039514306 0.828327833  
0.450346002 0.746195972 0.813853703 2:55836165-A-C ENSG00000138035  
2:55841640-T-C:ENSG00000138035 0.561476075 0.039514306 0.828327833  
0.197042097 0.714734306 0.702759696 2:55841640-T-C ENSG00000138035  
rs782590:ENSG00000138035 0.466235935 0.039514306 0.828327833  
0.450346002 0.74808171 0.813853703 rs782590 ENSG00000138035  
rs782595:55845596:C:G:ENSG00000138035 0.466235935 0.039514306  
0.828327833 0.445043357 0.749667392 0.813853703 rs782595:55845596:C:G  
ENSG00000138035  
2:55847423-C-T:ENSG00000138035 0.33585794 0.039514306 0.83357244  
0.276782326 0.66458282 0.813853703 2:55847423-C-T ENSG00000138035  
2:55848244-T-C:ENSG00000138035 0.326821943 0.039514306 0.837990064  
0.263905944 0.636822477 0.813853703 2:55848244-T-C ENSG00000138035  
2:55853341-T-C:ENSG00000138035 0.461917041 0.039514306 0.831071716  
0.492233123 0.746195972 0.782163764 2:55853341-T-C ENSG00000138035  
rs143406758:55858767:T:TAA:ENSG00000138035 0.405404276 0.039514306  
0.83357244 0.491850645 0.614364441 0.813853703  
rs143406758:55858767:T:TAA ENSG00000138035  
rs782650:55860399:T:C:ENSG00000138035 0.47802723 0.039514306  
0.853698456 0.478009532 0.694942942 0.813853703 rs782650:55860399:T:C  
ENSG00000138035  
rs201929616:55864006:AAACAACAAC:AAAC:ENSG00000138035 0.554566691  
0.039514306 0.801175004 0.558498626 0.90539517 0.66967784  
rs201929616:55864006:AAACAACAAC:AAAC ENSG00000138035  
rs10579642:55872969:ACTT:A:ENSG00000138035 0.552982152 0.039514306  
0.805916186 0.558498626 0.899275605 0.674365303  
rs10579642:55872969:ACTT:A ENSG00000138035  
rs2627776:55873301:T:A:ENSG00000138035 0.552661405 0.039514306  
0.809704997 0.558498626 0.897716677 0.674365303  
rs2627776:55873301:T:A ENSG00000138035  
rs62165226:55878339:C:T:ENSG00000138035 0.484913843 0.039514306  
0.704400012 0.558498626 0.850094681 0.6481702  
rs62165226:55878339:C:T ENSG00000138035  
rs7557134:55878927:A:T:ENSG00000138035 0.606481133 0.039514306  
0.690411919 0.519043541 0.934841002 0.282646046  
rs7557134:55878927:A:T ENSG00000138035

rs782566:55880182:T:C:ENSG00000138035 0.552661405 0.039514306  
0.809704997 0.558498626 0.897716677 0.674365303 rs782566:55880182:T:C  
ENSG00000138035  
2:55881538-T-C:ENSG00000138035 0.552661405 0.039514306 0.809704997  
0.558498626 0.897716677 0.674365303 2:55881538-T-C ENSG00000138035  
rs7571474:55882471:A:T:ENSG00000138035 0.552661405 0.039514306  
0.809704997 0.558498626 0.897716677 0.674365303  
rs7571474:55882471:A:T ENSG00000138035  
rs2627765:ENSG00000138035 0.561173628 0.039514306 0.760415187  
0.558498626 0.9305498 0.650718924 rs2627765 ENSG00000138035  
rs2586952:55884363:C:T:ENSG00000138035 0.552268484 0.039514306  
0.803318767 0.558498626 0.894985085 0.672369682  
rs2586952:55884363:C:T ENSG00000138035  
rs7596377:55888612:T:A:ENSG00000138035 0.548948418 0.039514306  
0.695869412 0.648772991 0.873234478 0.813853703  
rs7596377:55888612:T:A ENSG00000138035  
2:55897700-T-C:ENSG00000138035 0.561219495 0.039514306 0.539346559  
0.737553103 0.9305498 0.511827661 2:55897700-T-C ENSG00000138035  
rs782632:55898290:C:G:ENSG00000138035 0.562225676 0.039514306  
0.542268712 0.734208802 0.9305498 0.522761587 rs782632:55898290:C:G  
ENSG00000138035  
2:55899425-T-C:ENSG00000138035 0.561219495 0.039514306 0.539346559  
0.737553103 0.9305498 0.511827661 2:55899425-T-C ENSG00000138035  
2:55900459-A-G:ENSG00000138035 0.561219495 0.039514306 0.536792521  
0.736814521 0.9305498 0.511827661 2:55900459-A-G ENSG00000138035  
rs782619:55908317:G:C:ENSG00000138035 0.366255875 0.039514306  
0.828327833 0.751091602 0.750632228 0.813853703 rs782619:55908317:G:C  
ENSG00000138035  
2:55912961-T-C:ENSG00000138035 0.359567157 0.039514306 0.828327833  
0.751091602 0.758499809 0.813853703 2:55912961-T-C ENSG00000138035  
rs12617719:55915826:G:C:ENSG00000138035 0.366255875 0.039514306  
0.828327833 0.751091602 0.846769489 0.823761454  
rs12617719:55915826:G:C ENSG00000138035  
rs782579:55917604:A:G:ENSG00000138035 0.52990015 0.039514306  
0.828369156 0.751091602 0.710284102 0.772415663 rs782579:55917604:A:G  
ENSG00000138035  
rs782584:55921116:C:G:ENSG00000138035 0.360450974 0.039514306  
0.828327833 0.751091602 0.752490742 0.813853703 rs782584:55921116:C:G  
ENSG00000138035  
2:55922930-C-T:ENSG00000138035 0.363374684 0.039514306 0.828327833  
0.732912465 0.760373793 0.813853703 2:55922930-C-T ENSG00000138035  
rs2627769:55927288:G:C:ENSG00000138035 0.519923405 0.039514306  
0.634291162 0.52264501 0.90539517 0.813853703  
rs2627769:55927288:G:C ENSG00000138035  
2:55928444-G-T:ENSG00000138035 0.525107551 0.039514306 0.618696386  
0.558498626 0.9305498 0.813853703 2:55928444-G-T ENSG00000138035  
rs1084525:ENSG00000138035 0.512944974 0.039514306 0.708429962  
0.387628207 0.749667392 0.841430456 rs1084525 ENSG00000138035  
rs2000415:38539844:G:A:ENSG00000185808 0.035322296 0.039514306  
0.617060937 0.290136921 0.455878819 0.453831125  
rs2000415:38539844:G:A ENSG00000185808  
rs6586290:43415883:T:C:ENSG00000237232 0.035322296 0.571275414  
0.683867068 0.756308082 0.173591669 0.813853703  
rs6586290:43415883:T:C ENSG00000237232



rs469359:43416334:C:T:ENSG00000237232 0.035322296 0.607882402  
0.853303291 0.751091602 0.774765425 0.813853703 rs469359:43416334:C:T  
ENSG00000237232

rs6586291:43417417:G:T:ENSG00000237232 0.035322296 0.272806835  
0.852758128 0.704759469 0.288162171 0.813853703  
rs6586291:43417417:G:T ENSG00000237232

rs467618:43418579:T:C:ENSG00000237232 0.035322296 0.603890882  
0.851622677 0.751091602 0.774765425 0.813853703 rs467618:43418579:T:C  
ENSG00000237232

rs2187239:43420555:C:A:ENSG00000237232 0.035322296 0.240653097 0.83247031  
0.69212661 0.328523647 0.813853703 rs2187239:43420555:C:A  
ENSG00000237232

rs3074939:43422429:ACAGT:A:ENSG00000237232 0.035322296 0.590785513  
0.845605705 0.751091602 0.784162464 0.813853703  
rs3074939:43422429:ACAGT:A ENSG00000237232

rs469622:43423214:T:C:ENSG00000237232 0.035322296 0.189251465  
0.828327833 0.670181625 0.340307796 0.813853703 rs469622:43423214:T:C  
ENSG00000237232

rs8130883:43426260:A:G:ENSG00000237232 0.035322296 0.509235376  
0.828327833 0.731916708 0.838427208 0.825642696  
rs8130883:43426260:A:G ENSG00000237232

rs4919969:43426579:C:T:ENSG00000237232 0.035322296 0.066642396  
0.766562582 0.611407088 0.438540244 0.818977027  
rs4919969:43426579:C:T ENSG00000237232

rs8132937:ENSG00000237232 0.035322296 0.367821565 0.767163632  
0.719332589 0.864250612 0.813853703 rs8132937 ENSG00000237232

rs987523:43427963:A:C:ENSG00000237232 0.035322296 0.039514306  
0.560108139 0.580315256 0.512857075 0.813853703 rs987523:43427963:A:C  
ENSG00000237232

rs7282789:ENSG00000237232 0.035322296 0.484305836 0.828327833  
0.720321711 0.848727643 0.833818368 rs7282789 ENSG00000237232

rs7281176:43428378:A:G:ENSG00000237232 0.035322296 0.039514306  
0.560108139 0.580315256 0.512857075 0.813853703  
rs7281176:43428378:A:G ENSG00000237232

rs11405691:43429267:G:GT:ENSG00000237232 0.035322296 0.42813865  
0.828327833 0.752110581 0.838427208 0.822016603  
rs11405691:43429267:G:GT ENSG00000237232

rs1628526:43429434:G:A:ENSG00000237232 0.035322296 0.039514306  
0.542268712 0.580315256 0.526407644 0.813853703  
rs1628526:43429434:G:A ENSG00000237232

rs76434486:44487601:C:T:ENSG00000160200 0.605787723 0.039514306  
0.568513848 0.491850645 0.683006713 0.382106273  
rs76434486:44487601:C:T ENSG00000160200

rs114917457:45421081:A:G:ENSG00000160221 0.035322296 0.039514306  
0.618696386 0.751091602 0.864454465 0.447199093  
rs114917457:45421081:A:G ENSG00000160221

rs60407126:45424867:T:C:ENSG00000160221 0.035322296 0.265249339  
0.745572892 0.663069216 0.550609082 0.464247637  
rs60407126:45424867:T:C ENSG00000160221

rs3838123:45433031:CT:C:ENSG00000241945 0.035322296 0.651399716  
0.651320451 0.558498626 0.218559406 0.619162849  
rs3838123:45433031:CT:C ENSG00000241945

rs3788097:45433269:C:T:ENSG00000241945 0.035322296 0.696563739  
0.642599458 0.705838141 0.279727316 0.785329549  
rs3788097:45433269:C:T ENSG00000241945  
rs4819366:45433468:G:A:ENSG00000160221 0.035322296 0.627222552  
0.398350929 0.276782326 0.069942274 0.108665807  
rs4819366:45433468:G:A ENSG00000160221  
rs2838466:45435187:A:T:ENSG00000160221 0.035322296 0.651399716 0.42239248  
0.276782326 0.069942274 0.108665807 rs2838466:45435187:A:T  
ENSG00000160221  
rs2838467:45436355:G:A:ENSG00000241945 0.035322296 0.651399716  
0.619854485 0.549689754 0.173591669 0.586168441  
rs2838467:45436355:G:A ENSG00000241945  
rs2838468:45437074:G:C:ENSG00000160221 0.035322296 0.663854097 0.42239248  
0.414104514 0.069942274 0.108665807 rs2838468:45437074:G:C  
ENSG00000160221  
rs60369997:45438024:CT:C:ENSG00000160221 0.035322296 0.664230643  
0.42239248 0.419678998 0.069942274 0.108665807  
rs60369997:45438024:CT:C ENSG00000160221  
rs58479261:45438251:CT:C:ENSG00000160221 0.035322296 0.272806835  
0.745572892 0.662029528 0.550609082 0.464247637  
rs58479261:45438251:CT:C ENSG00000160221  
rs9974165:45438432:T:C:ENSG00000241945 0.035322296 0.661628136  
0.690411919 0.621489118 0.218559406 0.774345221  
rs9974165:45438432:T:C ENSG00000241945  
rs2299812:45438890:C:T:ENSG00000241945 0.035322296 0.661628136  
0.690411919 0.621489118 0.218559406 0.774345221  
rs2299812:45438890:C:T ENSG00000241945  
rs2299813:45439053:T:G:ENSG00000241945 0.035322296 0.661628136  
0.690411919 0.621489118 0.218559406 0.774345221  
rs2299813:45439053:T:G ENSG00000241945  
rs2299815:45439812:T:A:ENSG00000241945 0.035322296 0.661628136  
0.690411919 0.621489118 0.218559406 0.774345221  
rs2299815:45439812:T:A ENSG00000241945  
rs4818878:45443290:C:T:ENSG00000160221 0.035322296 0.651399716 0.42239248  
0.276782326 0.069942274 0.108665807 rs4818878:45443290:C:T  
ENSG00000160221  
rs2276530:45444829:C:G:ENSG00000160221 0.035322296 0.638346134  
0.470302738 0.276782326 0.069942274 0.225997306  
rs2276530:45444829:C:G ENSG00000160221  
rs2256392:45446504:T:C:ENSG00000160221 0.035322296 0.634930259  
0.485354668 0.276782326 0.069942274 0.108665807  
rs2256392:45446504:T:C ENSG00000160221  
rs2256441:45446589:G:A:ENSG00000160221 0.035322296 0.634930259  
0.485354668 0.276782326 0.069942274 0.108665807  
rs2256441:45446589:G:A ENSG00000160221  
rs2238704:45448138:T:C:ENSG00000160221 0.035322296 0.651399716 0.42239248  
0.276782326 0.069942274 0.108665807 rs2238704:45448138:T:C  
ENSG00000160221  
rs2238706:45448595:A:C:ENSG00000160221 0.035322296 0.634930259  
0.485354668 0.276782326 0.069942274 0.108665807  
rs2238706:45448595:A:C ENSG00000160221  
rs2238707:45448793:T:C:ENSG00000160221 0.035322296 0.651399716 0.42239248  
0.276782326 0.069942274 0.108665807 rs2238707:45448793:T:C  
ENSG00000160221

rs2238709:45449218:A:C:ENSG00000241945 0.035322296 0.661628136  
0.691910845 0.621111272 0.237095457 0.775020218  
rs2238709:45449218:A:C ENSG00000241945  
rs2838471:45449845:A:G:ENSG00000160221 0.035322296 0.621180076  
0.360243455 0.165229468 0.069942274 0.108665807  
rs2838471:45449845:A:G ENSG00000160221  
rs2838472:45450717:C:T:ENSG00000160221 0.035322296 0.621180076  
0.360243455 0.165229468 0.069942274 0.108665807  
rs2838472:45450717:C:T ENSG00000160221  
rs8126754:45450869:G:A:ENSG00000160221 0.035322296 0.658405986  
0.360243455 0.36680942 0.069942274 0.108665807  
rs8126754:45450869:G:A ENSG00000160221  
rs2238710:45453616:C:T:ENSG00000241945 0.035322296 0.651399716 0.65244831  
0.757384683 0.690981753 0.813853703 rs2238710:45453616:C:T  
ENSG00000241945  
rs2238711:45453956:A:G:ENSG00000241945 0.035322296 0.651399716  
0.634291162 0.558498626 0.173591669 0.614118716  
rs2238711:45453956:A:G ENSG00000241945  
rs2238712:45454778:A:G:ENSG00000241945 0.035322296 0.690185039 0.65418952  
0.714638955 0.614364441 0.775020218 rs2238712:45454778:A:G  
ENSG00000241945  
rs2247400:45456458:C:T:ENSG00000160221 0.035322296 0.40461139  
0.090437058 0.072575018 0.069942274 0.063994875  
rs2247400:45456458:C:T ENSG00000160221  
rs729882:45457300:C:G:ENSG00000160221 0.035322296 0.665537052 0.42239248  
0.414104514 0.069942274 0.108665807 rs729882:45457300:C:G  
ENSG00000160221  
rs56218303:45460697:A:G:ENSG00000160221 0.035322296 0.110495165  
0.579532834 0.653716589 0.403448628 0.382106273  
rs56218303:45460697:A:G ENSG00000160221  
rs9982663:45464898:C:T:ENSG00000160221 0.035322296 0.603890882 0.42239248  
0.165229468 0.069942274 0.108665807 rs9982663:45464898:C:T  
ENSG00000160221  
rs7279727:45465860:G:A:ENSG00000241945 0.035322296 0.693773499  
0.655792554 0.660057498 0.690981753 0.674365303  
rs7279727:45465860:G:A ENSG00000241945  
rs2277805:45494183:G:A:ENSG00000160221 0.487561869 0.039514306  
0.090437058 0.123210094 0.54593522 0.108665807  
rs2277805:45494183:G:A ENSG00000160221  
rs2000469:24245292:A:G:ENSG00000272787 0.268135474 0.039514306  
0.090437058 0.442167795 0.069942274 0.457928806  
rs2000469:24245292:A:G ENSG00000272787  
rs4822451:ENSG00000272787 0.349088436 0.039514306 0.542268712  
0.491850645 0.069942274 0.282646046 rs4822451 ENSG00000272787  
rs4822451:ENSG00000273295 0.564612602 0.039514306 0.121437838  
0.558498626 0.311775972 0.319318857 rs4822451 ENSG00000273295  
rs2330635:24251344:T:C:ENSG00000272787 0.035322296 0.039514306  
0.184980376 0.290136921 0.069942274 0.063994875  
rs2330635:24251344:T:C ENSG00000272787  
rs2330635:24251344:T:C:ENSG00000273295 0.515908395 0.039514306  
0.466752146 0.751091602 0.355219989 0.319318857  
rs2330635:24251344:T:C ENSG00000273295

rs2154594:24254055:C:T:ENSG00000273295 0.523334588 0.039514306  
0.568513848 0.751091602 0.525520858 0.471730191  
rs2154594:24254055:C:T ENSG00000273295  
rs2186366:ENSG00000272787 0.081933656 0.039514306 0.184980376  
0.333474506 0.069942274 0.201281701 rs2186366 ENSG00000272787  
rs116096195:39522791:C:G:ENSG00000209482 0.556070492 0.039514306  
0.618696386 0.072575018 0.574209974 0.72816107  
rs116096195:39522791:C:G ENSG00000209482  
rs6001451:39533012:G:T:ENSG00000209482 0.584874096 0.039514306  
0.492105461 0.072575018 0.840433638 0.813853703  
rs6001451:39533012:G:T ENSG00000209482  
rs6001452:39536745:C:T:ENSG00000209482 0.528486083 0.039514306  
0.568513848 0.072575018 0.455878819 0.740076738  
rs6001452:39536745:C:T ENSG00000209482  
22:39538969:T:C:ENSG00000209482 0.528851151 0.039514306 0.568513848  
0.072575018 0.455878819 0.738263203 22:39538969:T:C ENSG00000209482  
rs79092618:39541398:G:A:ENSG00000209482 0.582267342 0.039514306  
0.466752146 0.072575018 0.835731578 0.813853703  
rs79092618:39541398:G:A ENSG00000209482  
rs192777317:39541721:C:G:ENSG00000209482 0.582488913 0.039514306  
0.466752146 0.072575018 0.839071584 0.813853703  
rs192777317:39541721:C:G ENSG00000209482  
rs114941660:39557691:C:T:ENSG00000209482 0.527236261 0.039514306  
0.594989053 0.072575018 0.498016841 0.753627885  
rs114941660:39557691:C:T ENSG00000209482  
rs9628166:50288611:G:A:ENSG00000182858 0.035322296 0.039514306  
0.054815691 0.072575018 0.069942274 0.063994875  
rs9628166:50288611:G:A ENSG00000182858  
rs7285892:50291435:C:G:ENSG00000182858 0.035322296 0.039514306  
0.054815691 0.072575018 0.069942274 0.063994875  
rs7285892:50291435:C:G ENSG00000182858  
rs4078978:ENSG00000221823 0.035322296 0.039514306 0.809082901  
0.589583216 0.641673925 0.814013767 rs4078978 ENSG00000221823  
rs77413521:68368278:A:G:ENSG00000221823 0.035322296 0.039514306  
0.828327833 0.601101423 0.690981753 0.813853703  
rs77413521:68368278:A:G ENSG00000221823  
rs77735628:68378367:C:A:ENSG00000221823 0.035322296 0.039514306  
0.828327833 0.593810582 0.690981753 0.813853703  
rs77735628:68378367:C:A ENSG00000221823  
rs17035043:68380184:C:G:ENSG00000221823 0.035322296 0.039514306  
0.828327833 0.558498626 0.580298595 0.813853703  
rs17035043:68380184:C:G ENSG00000221823  
rs79883557:68383901:C:T:ENSG00000221823 0.035322296 0.039514306  
0.828327833 0.558498626 0.629639249 0.813853703  
rs79883557:68383901:C:T ENSG00000221823  
rs76996709:68396495:A:C:ENSG00000221823 0.060909118 0.039514306  
0.823177523 0.558498626 0.690981753 0.842355515  
rs76996709:68396495:A:C ENSG00000221823  
rs11676702:68410587:T:C:ENSG00000221823 0.035322296 0.039514306  
0.812077641 0.524793443 0.647818531 0.83880684  
rs11676702:68410587:T:C ENSG00000221823  
rs76476469:68419127:G:A:ENSG00000221823 0.035322296 0.039514306  
0.796832314 0.491850645 0.585329409 0.838472125  
rs76476469:68419127:G:A ENSG00000221823

rs116211567:68425404:T:C:ENSG00000221823 0.035322296 0.039514306  
0.812077641 0.492233123 0.595947504 0.839791486  
rs116211567:68425404:T:C ENSG00000221823  
rs80050140:68428541:C:T:ENSG00000221823 0.035322296 0.039514306  
0.819328396 0.509242766 0.629639249 0.839299714  
rs80050140:68428541:C:T ENSG00000221823  
rs150805391:68436004:G:A:ENSG00000221823 0.035322296 0.039514306  
0.818979265 0.52264501 0.650850274 0.840382108  
rs150805391:68436004:G:A ENSG00000221823  
rs75483778:68437802:A:G:ENSG00000221823 0.035322296 0.039514306  
0.798594848 0.519043541 0.635943247 0.840382108  
rs75483778:68437802:A:G ENSG00000221823  
rs77412649:68440105:A:G:ENSG00000221823 0.035322296 0.039514306  
0.803318767 0.491850645 0.54593522 0.839791486  
rs77412649:68440105:A:G ENSG00000221823  
rs77099646:68440779:C:T:ENSG00000221823 0.035322296 0.039514306  
0.818604668 0.520505218 0.636822477 0.840209939  
rs77099646:68440779:C:T ENSG00000221823  
rs74577030:68445889:C:G:ENSG00000221823 0.035322296 0.039514306  
0.818604668 0.520505218 0.636822477 0.840209939  
rs74577030:68445889:C:G ENSG00000221823  
2:68447156:T:TA:ENSG00000221823 0.035322296 0.039514306 0.818604668  
0.520505218 0.636822477 0.840209939 2:68447156:T:TA ENSG00000221823  
rs77227574:68455362:T:C:ENSG00000221823 0.035322296 0.039514306  
0.806718901 0.491850645 0.559581427 0.84232591  
rs77227574:68455362:T:C ENSG00000221823  
rs80076253:68457046:A:G:ENSG00000221823 0.035322296 0.039514306  
0.764690605 0.447551187 0.493250562 0.835748811  
rs80076253:68457046:A:G ENSG00000221823  
rs78665953:68468287:C:T:ENSG00000221823 0.035322296 0.039514306  
0.720006217 0.390584104 0.403448628 0.837651503  
rs78665953:68468287:C:T ENSG00000221823  
rs148916743:68477949:A:AC:ENSG00000221823 0.035322296 0.039514306  
0.757967988 0.385352708 0.388754065 0.842114526  
rs148916743:68477949:A:AC ENSG00000221823  
rs72901491:ENSG00000196975 0.035322296 0.637435282 0.560108139  
0.706630618 0.688090257 0.140342165 rs72901491 ENSG00000196975  
rs72901501:69954428:C:T:ENSG00000196975 0.035322296 0.422190018  
0.324917292 0.730273051 0.574209974 0.319318857  
rs72901501:69954428:C:T ENSG00000196975  
rs73935682:69955214:A:G:ENSG00000196975 0.035322296 0.597037291  
0.593231314 0.693177798 0.690981753 0.447199093  
rs73935682:69955214:A:G ENSG00000196975  
rs59451097:69955520:C:T:ENSG00000196975 0.035322296 0.600158632  
0.419451892 0.716285682 0.746195972 0.358316132  
rs59451097:69955520:C:T ENSG00000196975  
rs78376655:69956334:C:A:ENSG00000196975 0.035322296 0.61756659  
0.617060937 0.701179176 0.7140776 0.468334324  
rs78376655:69956334:C:A ENSG00000196975  
rs77740778:69956386:T:C:ENSG00000196975 0.035322296 0.599639892  
0.592067279 0.678782234 0.690981753 0.441545027  
rs77740778:69956386:T:C ENSG00000196975

rs149599981:69956405:CA:C:ENSG00000196975 0.035322296 0.596705968  
0.48190184 0.709051726 0.74808171 0.431187426  
rs149599981:69956405:CA:C ENSG00000196975  
rs148456893:69956895:A:ATTAAAG:ENSG00000196975 0.035322296  
0.573615857 0.370396184 0.709051726 0.714300296 0.225997306  
rs148456893:69956895:A:ATTAAAG ENSG00000196975  
rs79199854:69957206:A:T:ENSG00000196975 0.035322296 0.590785513  
0.429802874 0.7025349 0.731951824 0.382106273  
rs79199854:69957206:A:T ENSG00000196975  
rs74908112:69957325:A:C:ENSG00000196975 0.035322296 0.607882402  
0.605977561 0.701179176 0.694942942 0.457928806  
rs74908112:69957325:A:C ENSG00000196975  
rs116707357:69957613:G:A:ENSG00000196975 0.035322296 0.608740409  
0.618696386 0.69625478 0.714734306 0.510329036  
rs116707357:69957613:G:A ENSG00000196975  
rs73935683:69957995:C:T:ENSG00000196975 0.035322296 0.651399716  
0.685268659 0.731347216 0.837812565 0.631825967  
rs73935683:69957995:C:T ENSG00000196975  
rs73935684:69958664:G:A:ENSG00000196975 0.035322296 0.611028519  
0.618696386 0.701179176 0.72290993 0.469127215  
rs73935684:69958664:G:A ENSG00000196975  
rs111596731:69959194:A:ACTC:ENSG00000196975 0.035322296 0.555252837  
0.466752146 0.699249305 0.73787295 0.545172079  
rs111596731:69959194:A:ACTC ENSG00000196975  
rs73935685:69961199:G:T:ENSG00000196975 0.035322296 0.597037291  
0.593231314 0.692903411 0.690981753 0.447199093  
rs73935685:69961199:G:T ENSG00000196975  
rs139026162:69964099:AATTTT:A:ENSG00000196975 0.035322296 0.597037291  
0.593231314 0.692903411 0.690981753 0.447199093  
rs139026162:69964099:AATTTT:A ENSG00000196975  
rs116521792:69965891:G:T:ENSG00000196975 0.035322296 0.611028519  
0.618696386 0.701179176 0.72290993 0.469127215  
rs116521792:69965891:G:T ENSG00000196975  
rs115970053:69965963:C:T:ENSG00000196975 0.035322296 0.57161313  
0.568513848 0.676517018 0.704734536 0.447199093  
rs115970053:69965963:C:T ENSG00000196975  
rs79921370:69970649:G:A:ENSG00000196975 0.035322296 0.651399716 0.6569085  
0.730273051 0.804199657 0.571826948 rs79921370:69970649:G:A  
ENSG00000196975  
rs73935689:69972338:C:A:ENSG00000196975 0.035322296 0.57709595  
0.584308021 0.678140685 0.688090257 0.460921055  
rs73935689:69972338:C:A ENSG00000196975  
rs55901770:69974078:C:A:ENSG00000196975 0.035322296 0.592406993  
0.597182664 0.678782234 0.690981753 0.464247637  
rs55901770:69974078:C:A ENSG00000196975  
rs13018652:86375470:A:G:ENSG00000273080 0.035322296 0.697692788  
0.269469279 0.459055393 0.9305498 0.464247637  
rs13018652:86375470:A:G ENSG00000273080  
rs62150072:86394290:C:T:ENSG00000273080 0.464690917 0.039514306  
0.054815691 0.276782326 0.069942274 0.063994875  
rs62150072:86394290:C:T ENSG00000273080  
rs2288114:86398206:C:T:ENSG00000273080 0.464133132 0.039514306  
0.054815691 0.276782326 0.069942274 0.063994875  
rs2288114:86398206:C:T ENSG00000273080



rs12475126:86421332:G:A:ENSG00000273080 0.41264224 0.039514306  
0.054815691 0.123210094 0.069942274 0.063994875  
rs12475126:86421332:G:A ENSG00000273080  
JHU\_2.87082678:ENSG00000183281 0.035322296 0.66742798 0.238368074  
0.63969334 0.882854595 0.740998143 JHU\_2.87082678 ENSG00000183281  
JHU\_2.87087811:ENSG00000183281 0.035322296 0.570701598 0.71850039  
0.751091602 0.9305498 0.813853703 JHU\_2.87087811 ENSG00000183281  
rs11688548:98167134:G:C:ENSG00000196912 0.035322296 0.700769429  
0.297111757 0.385352708 0.9305498 0.776319597  
rs11688548:98167134:G:C ENSG00000196912  
rs12998184:98169742:A:C:ENSG00000196912 0.035322296 0.700769429  
0.222302049 0.37163762 0.9305498 0.75609486  
rs12998184:98169742:A:C ENSG00000196912  
rs12993250:98175712:C:T:ENSG00000196912 0.035322296 0.698760559  
0.324917292 0.395341642 0.9305498 0.779852454  
rs12993250:98175712:C:T ENSG00000196912  
rs11681640:98177124:T:G:ENSG00000196912 0.035322296 0.699867874  
0.297111757 0.379688866 0.9305498 0.776319597  
rs11681640:98177124:T:G ENSG00000196912  
rs4086889:98184234:C:A:ENSG00000196912 0.035322296 0.680193701  
0.238368074 0.165229468 0.574209974 0.491393172  
rs4086889:98184234:C:A ENSG00000196912  
rs13027550:98188646:G:A:ENSG00000196912 0.035322296 0.698760559  
0.255451763 0.379688866 0.9305498 0.758762279  
rs13027550:98188646:G:A ENSG00000196912  
rs9679339:98189508:T:C:ENSG00000196912 0.035322296 0.69822324  
0.351078567 0.408307051 0.9305498 0.773208495  
rs9679339:98189508:T:C ENSG00000196912  
rs200863691:98191241:A:G:ENSG00000196912 0.035322296 0.69822324  
0.351078567 0.408307051 0.9305498 0.773208495  
rs200863691:98191241:A:G ENSG00000196912  
rs6721032:103332511:G:A:ENSG00000135953 0.035322296 0.039514306  
0.054815691 0.072575018 0.069942274 0.063994875  
rs6721032:103332511:G:A ENSG00000135953  
rs147365389:103333660:T:G:ENSG00000135953 0.035322296 0.039514306  
0.054815691 0.072575018 0.069942274 0.063994875  
rs147365389:103333660:T:G ENSG00000135953  
rs111362163:103339733:A:T:ENSG00000135953 0.035322296 0.039514306  
0.054815691 0.072575018 0.069942274 0.063994875  
rs111362163:103339733:A:T ENSG00000135953  
exm220234:ENSG00000198142 0.271758927 0.039514306 0.054815691  
0.301206855 0.069942274 0.501122218 exm220234 ENSG00000198142  
rs7421852:113990261:G:A:ENSG00000125618 0.175415731 0.039514306  
0.165546404 0.66652992 0.504458419 0.491393172  
rs7421852:113990261:G:A ENSG00000125618  
rs10206269:113990393:C:A:ENSG00000125618 0.175415731 0.039514306  
0.14398786 0.664350164 0.493250562 0.4815871  
rs10206269:113990393:C:A ENSG00000125618  
rs56703235:120423530:C:G:ENSG00000144120 0.035322296 0.451714699  
0.5960947 0.608765679 0.832782751 0.358316132  
rs56703235:120423530:C:G ENSG00000144120  
rs11358505:120427014:CA:C:ENSG00000144120 0.035322296 0.12731097  
0.054815691 0.463396258 0.603710229 0.713958104  
rs11358505:120427014:CA:C ENSG00000144120

rs6754531:120431274:C:T:ENSG00000144120 0.035322296 0.272806835  
0.360243455 0.539448558 0.789409778 0.374953256  
rs6754531:120431274:C:T ENSG00000144120  
rs72965093:120432159:A:T:ENSG00000144120 0.035322296 0.272806835  
0.360243455 0.549689754 0.800338944 0.382106273  
rs72965093:120432159:A:T ENSG00000144120  
rs73948943:120432619:A:G:ENSG00000144120 0.035322296 0.33968813  
0.411358711 0.558498626 0.837812565 0.423659401  
rs73948943:120432619:A:G ENSG00000144120  
rs11895880:ENSG00000144120 0.035322296 0.174910011 0.165546404  
0.491850645 0.589126514 0.590052663 rs11895880 ENSG00000144120  
exm223737:ENSG00000144120 0.035322296 0.089622533 0.054815691  
0.472415297 0.644255189 0.731384436 exm223737 ENSG00000144120  
rs1983406:120439230:C:G:ENSG00000144120 0.035322296 0.257351931  
0.121437838 0.492233123 0.690981753 0.761962752  
rs1983406:120439230:C:G ENSG00000144120  
rs2280510:120439841:C:T:ENSG00000144120 0.035322296 0.145249232  
0.054815691 0.486971863 0.629639249 0.691293333  
rs2280510:120439841:C:T ENSG00000144120  
2:128174054-G-A:ENSG00000236682 0.035322296 0.42180657 0.759245271  
0.549689754 0.690981753 0.813853703 2:128174054-G-A ENSG00000236682  
rs2069913:128178259:C:G:ENSG00000236682 0.035322296 0.668532818  
0.568513848 0.76780829 0.580298595 0.739943978  
rs2069913:128178259:C:G ENSG00000236682  
rs2069914:128178272:G:A:ENSG00000236682 0.035322296 0.695446627  
0.618696386 0.781060792 0.690981753 0.813853703  
rs2069914:128178272:G:A ENSG00000236682  
rs1880989:132186822:G:A:ENSG00000152117 0.035322296 0.661628136  
0.756966764 0.647697296 0.942757737 0.813853703  
rs1880989:132186822:G:A ENSG00000152117  
rs2007666:132187644:G:T:ENSG00000152117 0.035322296 0.661628136  
0.760415187 0.653716589 0.948389912 0.813853703  
rs2007666:132187644:G:T ENSG00000152117  
rs58765639:132202559:T:C:ENSG00000152117 0.035322296 0.461224231  
0.828327833 0.606736417 0.9305498 0.813853703  
rs58765639:132202559:T:C ENSG00000152117  
rs7590173:132216315:G:T:ENSG00000152117 0.035322296 0.624238809  
0.828327833 0.676517018 0.9305498 0.828182106  
rs7590173:132216315:G:T ENSG00000152117  
rs7600711:132216395:C:T:ENSG00000152117 0.035322296 0.451714699  
0.454299825 0.509242766 0.920590777 0.664807456  
rs7600711:132216395:C:T ENSG00000152117
